# Supplementary material for: A highly efficient catalytic method for the synthesis of phosphite diesters
Source: Royal Society of Chemistry journal article supplement (doi:10.1039/d4sc01401d), 2024-01-01
Supplement: d4sc01401d1.pdf [file d4sc01401d1.pdf]

## **A Highly Efficient Catalytic Method for the Synthesis of Phosphite Diesters**

Yuki Saito, Soomin Cho, Luca Alessandro Danieli, Akira Matsunaga, and Shū Kobayashi

shu\_kobayashi@chem.s.u-tokyo.ac.jp

Department of Chemistry, School of Science, The University of Tokyo, 7-3-1, Hongo,  
Bunkyo-Ku, Tokyo, 113-0033, JAPAN

### **Supporting Information**

#### Contents

1. General
2. Additional data for comparison with previous study
3. Additional optimizations
4. Mechanistic study
5. Data and discussion of NMR experiments
6. Experimental Procedure
7. Product data
8. NMR data
9. References

## 1. General

- JEOL JNM-ECZ 500R/M3 or ECX 600 spectrometers were used for NMR measurement. Tetramethyl silane was used as an internal standard for  $^1\text{H}$  NMR ( $\delta = 0$  ppm), and  $\text{CDCl}_3$  or  $\text{DMSO}-d_6$  was used for  $^{13}\text{C}$  NMR ( $\text{CDCl}_3$ :  $\delta = 77.00$  ppm,  $\text{DMSO}-d_6$ :  $\delta = 39.50$  ppm). Structures of known compounds were confirmed by comparing them with data shown in the literature.
- IR spectra were measured using Shimadzu IRSpirit spectrometer.
- DART and ESI mass spectra were recorded on JEOL JMS-T100TD mass spectrometer.
- APCI mass spectra were recorded on Shimadzu LCMS-IT-TOF mass spectrometer.
- Solvents were purchased in anhydrous grade from FUJIFILM Wako Pure Chemical Corporation and Kanto Chemical Co. Inc. and used as received.
- MS 5A was purchased from Sigma-Aldrich as a powder form and dried at  $100\text{ }^\circ\text{C}$  under vacuum before use.
- $\text{Zn}(\text{acac})_2$ ,  $\text{Zn}(\text{OAc})_2$ , and  $\text{Zn}(\text{TMHD})_2$  were purchased from Tokyo Chemical Industry Co., Ltd. and FUJIFILM Wako Pure Chemical Corporation and used as received.  $\text{Zn}(\text{OPiv})_2$  was prepared from commercially available starting materials by following the reported methods.<sup>[1]</sup>
- Alcohols **1** except for **1aa**, **1ad** were purchased from Tokyo Chemical Industry Co., Ltd. and FUJIFILM Wako Pure Chemical Corporation or prepared from commercially available starting materials by following reported methods.<sup>[2-10]</sup> All of them were purified by distillation or recrystallization before use.
- Phosphite **2** was prepared by following reported methods<sup>[11]</sup> and phosphite **2'** was purchased from Tokyo Chemical Industry Co., Ltd. Both of them were purified by distillation before use.
- All commercially available reagents, unless otherwise stated, were used without further purification.
- All reactions, unless otherwise stated, were carried out under an argon atmosphere.

## 2. Additional data for comparison with previous study

**Table S0. Comparison of the previous method and the new method (reactivity)**

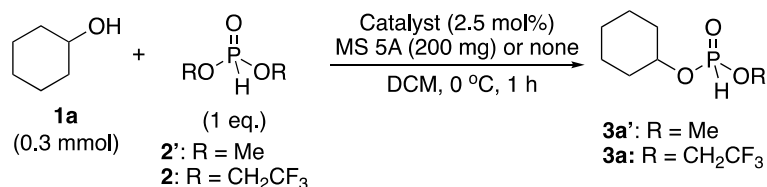

| R                               | Catalyst              | MS | Yield (%) <sup>a</sup> | Comment                      |
|---------------------------------|-----------------------|----|------------------------|------------------------------|
| Me                              | Zn(acac) <sub>2</sub> | +  | <5                     | Previous method <sup>b</sup> |
| Me                              | Zn(acac) <sub>2</sub> | –  | <5                     | Previous method <sup>b</sup> |
| CH <sub>2</sub> CF <sub>3</sub> | Zn(acac) <sub>2</sub> | –  | 42                     | New method                   |
| CH <sub>2</sub> CF <sub>3</sub> | Zn(TMHD) <sub>2</sub> | –  | 97                     | New method                   |

<sup>a</sup> Yield was determined by <sup>1</sup>H NMR analysis using 1,3,5-trimethoxybenzene as an internal standard. <sup>b</sup> *Org. Lett.* **2020**, *22*, 3171.

**Table S1. Optimization of consecutive phosphonylation of 3a' (Scheme 2)**

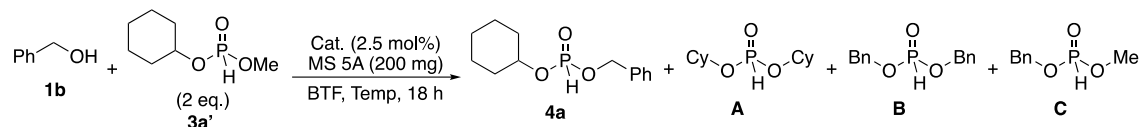

| Entry | Catalyst                              | Temp. | Yield <sup>a</sup> (%) |        |       |      |
|-------|---------------------------------------|-------|------------------------|--------|-------|------|
|       |                                       |       | 4a                     | A      | B     | C    |
| 1     | Zn(acac) <sub>2</sub>                 | rt    | 78(75)                 | 14(13) | 11(9) | 5(5) |
| 2     | Zn(TMHD) <sub>2</sub>                 | rt    | 76                     | 19     | 12    | 9    |
| 3     | Zn(acac-F <sub>6</sub> ) <sub>2</sub> | rt    | 5                      | 0      | 0     | 0    |
| 4     | Zn(OTf) <sub>2</sub>                  | rt    | 21                     | 0      | 0     | 3    |
| 5     | Zn(OAc) <sub>2</sub>                  | rt    | 84                     | 9      | 7     | 2    |
| 6     | Zn(OBz) <sub>2</sub>                  | rt    | 71                     | 4      | 6     | 3    |
| 7     | ZnEt <sub>2</sub>                     | rt    | 2(5)                   | 0(0)   | 0(0)  | 0(0) |
| 8     | ZnBr <sub>2</sub>                     | rt    | 1(3)                   | 0(0)   | 0(0)  | 0(0) |
| 9     | Zn(OMe) <sub>2</sub>                  | rt    | 0                      | 0      | 0     | 0    |
| 10    | Zn(TFA) <sub>2</sub>                  | rt    | 51(58)                 | 2(2)   | 3(4)  | 3(3) |
| 11    | Zn(OPiv) <sub>2</sub>                 | rt    | 73                     | 6      | 8     | 3    |
| 12    | Zinc isobutyrate                      | rt    | 77                     | 5      | 8     | 3    |

|    |                                        |      |    |    |   |    |
|----|----------------------------------------|------|----|----|---|----|
| 13 | Zn(acac) <sub>2</sub>                  | 0 °C | 65 | 9  | 7 | 5  |
| 14 | Zn(TMHD) <sub>2</sub>                  | 0 °C | 52 | 9  | 7 | 7  |
| 15 | Zn(OAc) <sub>2</sub>                   | 0 °C | 39 | 1  | 3 | 2  |
| 16 | Zinc propionate                        | rt   | 4  | 7  | 3 | 89 |
| 17 | Zinc formate                           | rt   | 8  | 11 | 8 | 2  |
| 18 | Zinc methoxy<br>acetate                | rt   | 6  | 0  | 0 | 0  |
| 19 | Zn(2-<br>Hydroxypyridine) <sub>2</sub> | rt   | 11 | 1  | 0 | 2  |
| 20 | Co(acac) <sub>2</sub>                  | rt   | 19 | 0  | 0 | 0  |
| 21 | Co(OAc) <sub>2</sub>                   | rt   | 71 | 4  | 8 | 3  |

<sup>a</sup>Yield was determined by <sup>1</sup>H NMR analysis using 1,2,4,5-tetramethylbenzene as an internal standard. Yield in parenthesis is the result of the second trial.

**Table S2.** Optimization of consecutive phosphorylation of **3a'** (Scheme 2)

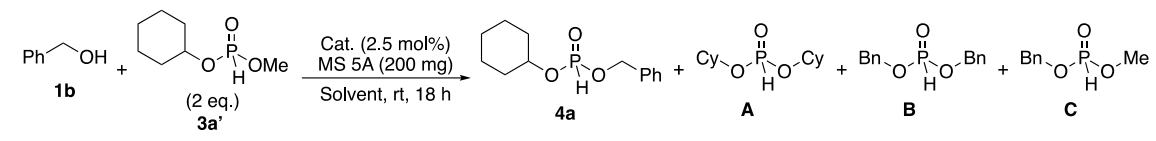

| Entry          | Solvent | MS   |        | Yield <sup>a</sup> [%] |       |      |      | Conv. [%] |
|----------------|---------|------|--------|------------------------|-------|------|------|-----------|
|                |         | Size | Amount | 4a                     | A     | B    | C    |           |
| 1              | BTF     | 5A   | 200 mg | 84(88)                 | 9(10) | 7(7) | 2(2) | >99(99)   |
| 2              | Toluene | 5A   | 200 mg | 85                     | 11    | 7    | 3    | 99        |
| 3              | DCM     | 5A   | 200 mg | 79                     | 8     | 8    | 5    | 92        |
| 4              | THF     | 5A   | 200 mg | 77                     | 4     | 7    | 5    | 79        |
| 5              | BTF     | 4A   | 200 mg | 23                     | 4     | 1    | 4    | 31        |
| 6              | BTF     | 3A   | 200 mg | 51                     | 1     | 4    | 3    | 59        |
| 7              | Toluene | 5A   | 300 mg | 82                     | 9     | 7    | 3    | 99        |
| 8 <sup>b</sup> | BTF     | 5A   | 200 mg | 64                     | 2     | 5    | 2    | 80        |

<sup>a</sup>Yield was determined by <sup>1</sup>H NMR analysis using 1,2,4,5-tetramethylbenzene as an internal standard. Yield in parenthesis is the result of the second trial. <sup>b</sup>Reaction was performed at 10 °C.

**Figure S1.** Reaction Profile of consecutive phosphorylation of **3a'** (Scheme 2)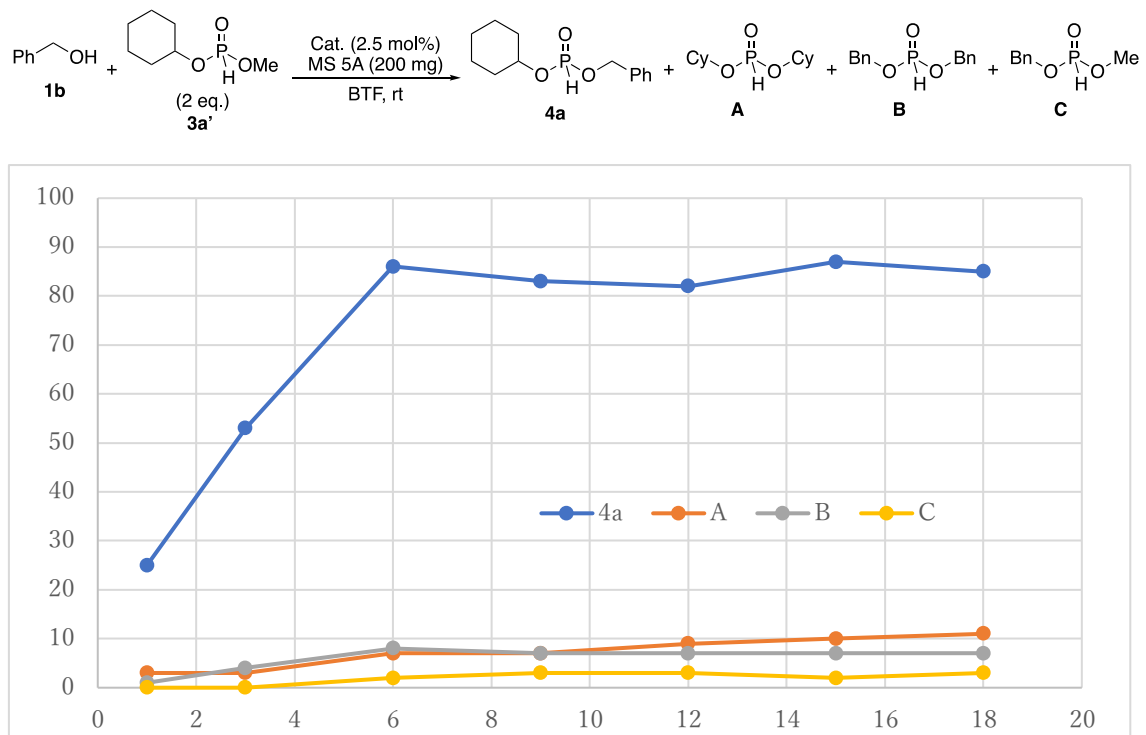

### 3. Additional optimizations

**Table S3.** Optimization of phosphonylation of **2I** with **2** (Scheme 3, Conditions B)

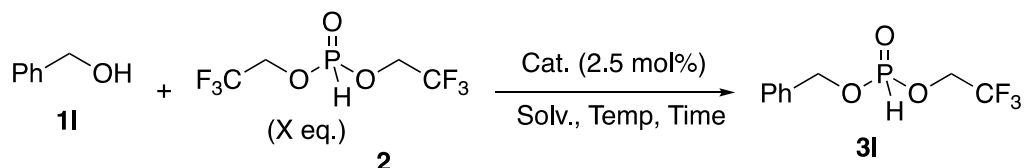

| Entry | X (eq.) | Catalyst              | Solvent | Temp. (°C) | Time (h) | Yield <sup>a</sup> (%) |
|-------|---------|-----------------------|---------|------------|----------|------------------------|
| 1     | 2       | Zn(TMHD) <sub>2</sub> | Toluene | 0          | 2        | 93                     |
| 2     | 1.5     | Zn(TMHD) <sub>2</sub> | Toluene | 0          | 2        | 89                     |
| 3     | 1.1     | Zn(TMHD) <sub>2</sub> | Toluene | 0          | 2        | 82                     |
| 4     | 2       | Zn(OPiv) <sub>2</sub> | Toluene | 0          | 2        | 95                     |
| 5     | 2       | Zn(TMHD) <sub>2</sub> | DCM     | 0          | 2        | 93                     |
| 6     | 1.1     | Zn(TMHD) <sub>2</sub> | Toluene | -20        | 22       | 86                     |
| 7     | 1.1     | Zn(OPiv) <sub>2</sub> | Toluene | -20        | 22       | 94                     |
| 8     | 1.1     | Zn(OPiv) <sub>2</sub> | Toluene | -20        | 12       | 94                     |

<sup>a</sup>Yield was determined by <sup>1</sup>H NMR analysis using 1,2,4,5-tetramethylbenzene as an internal standard.

**Table S4.** Optimization of consecutive phosphonylation of **1ac** with **2** (Scheme 3, Conditions D)

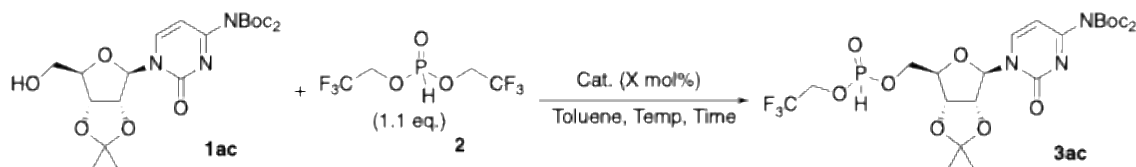

| Entry          | Catalyst              | Temp. (°C) | X (mol%) | Time (h) <sup>a</sup> | Results                                                                    |
|----------------|-----------------------|------------|----------|-----------------------|----------------------------------------------------------------------------|
| 1              | Zn(TMHD) <sub>2</sub> | rt         | 5        | 3                     | Messy crude <sup>1</sup> H & <sup>31</sup> P NMR, significant overreaction |
| 2              | Zn(OPiv) <sub>2</sub> | rt         | 5        | 8                     | Messy crude <sup>1</sup> H & <sup>31</sup> P NMR, significant overreaction |
| 3 <sup>b</sup> | Zn(OPiv) <sub>2</sub> | 0          | 2.5      | 17                    | Low conversion                                                             |
| 4 <sup>b</sup> | Zn(OPiv) <sub>2</sub> | 0          | 5        | 19                    | 96% target yield                                                           |

<sup>a</sup>Reaction monitored by TLC, quenched at full conversion. <sup>b</sup>Reaction conducted in DCM instead of Toluene

**Table S5. Optimization of One-pot Reaction (Scheme 4)**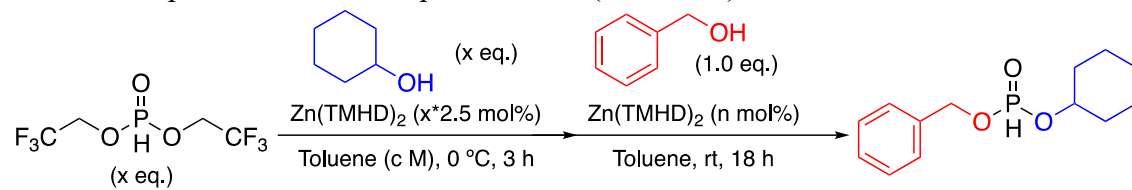

| Entry          | x (eq.) | c (M) | n (mol%) | Yield (%) |
|----------------|---------|-------|----------|-----------|
| 1              | 1       | 0.3   | 0        | 15        |
| 2              | 1.2     | 0.3   | 0        | 49        |
| 3              | 1.2     | 0.3   | 2.5      | 85        |
| 4              | 1.3     | 0.3   | 2.5      | 76        |
| 5              | 1.3     | 0.38  | 2.5      | 85        |
| 6              | 1.5     | 0.38  | 2.5      | 89        |
| 7 <sup>a</sup> | 1.5     | 0.38  | 2.5      | 89        |

#### 4. Mechanistic study

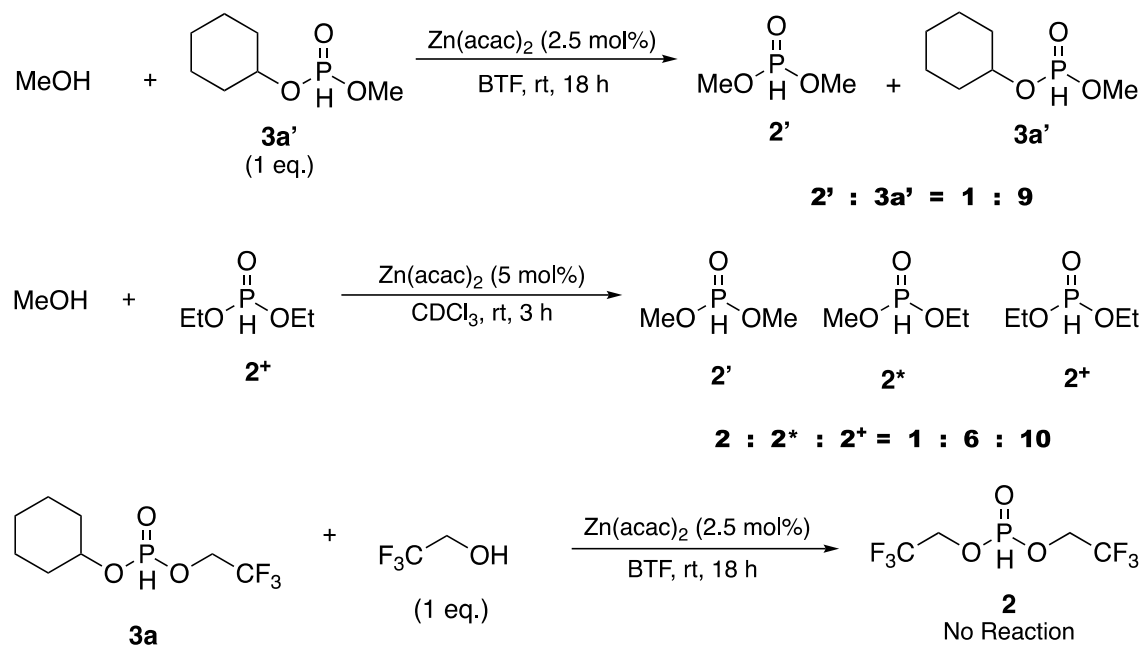

**Scheme S1.** Reversibility Experiments using **2** and **2'** as phosphorylation reagents



## 5. Data and discussion for NMR experiments

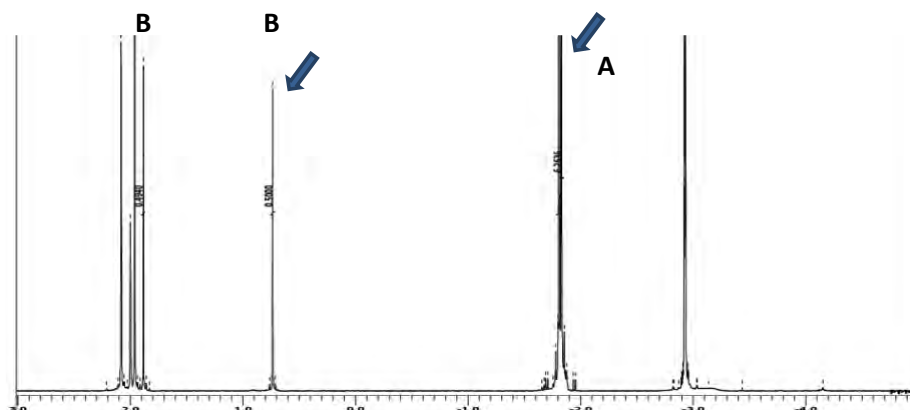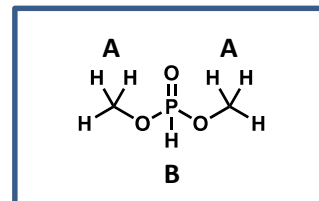

**Figure S2-1.**  $^1\text{H}$  NMR spectrum of Dimethyl Phosphite in Toluene- $d_8$

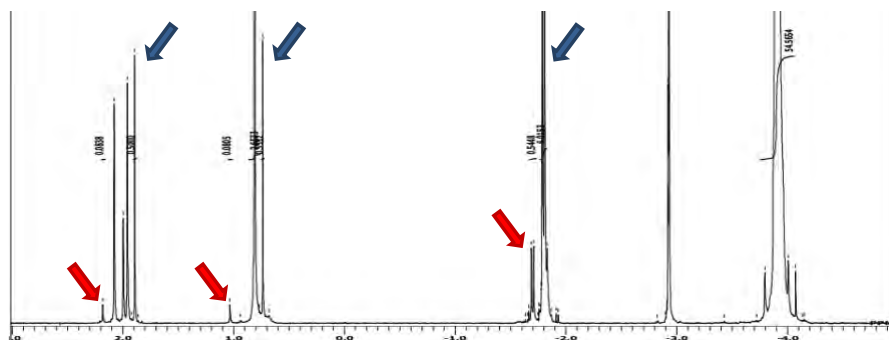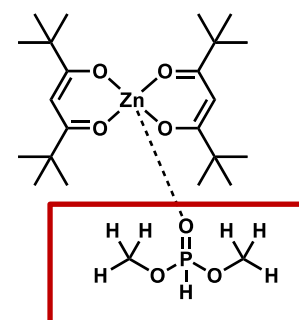

**Figure S2-2.**  $^1\text{H}$  NMR spectrum of Dimethyl Phosphite +  $\text{Zn}(\text{TMHD})_2$  1 equiv. in Toluene- $d_8$

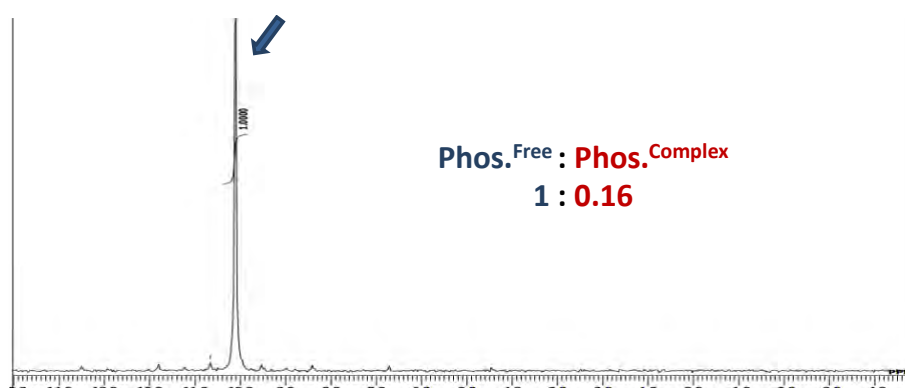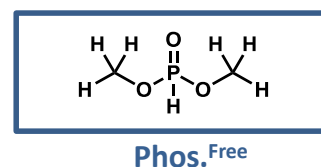

**Figure S3-1.**  $^{31}\text{P}$  NMR spectrum of Dimethyl Phosphite in Toluene- $d_8$

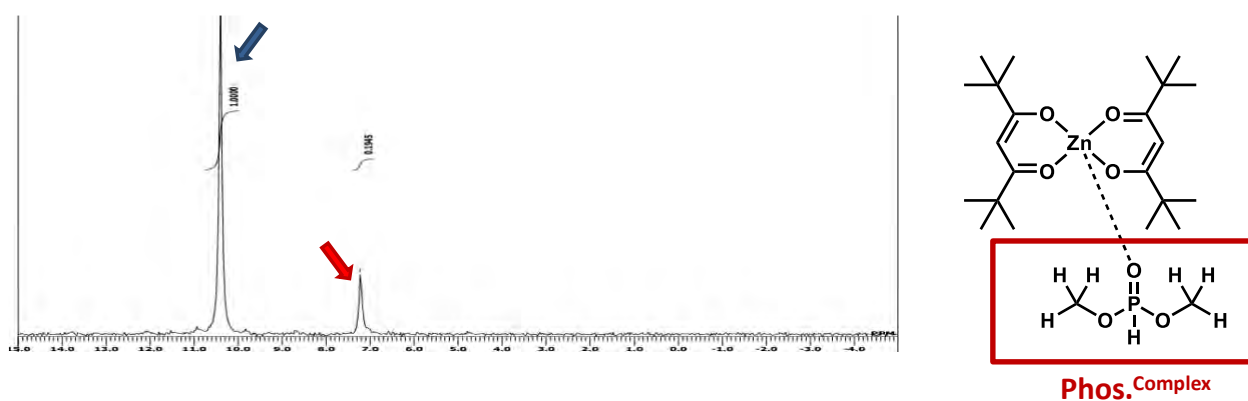

**Figure S3-2.**  $^{31}\text{P}$  NMR spectrum of Dimethyl Phosphite +  $\text{Zn}(\text{TMHD})_2$  1 equiv. in Toluene- $d_8$

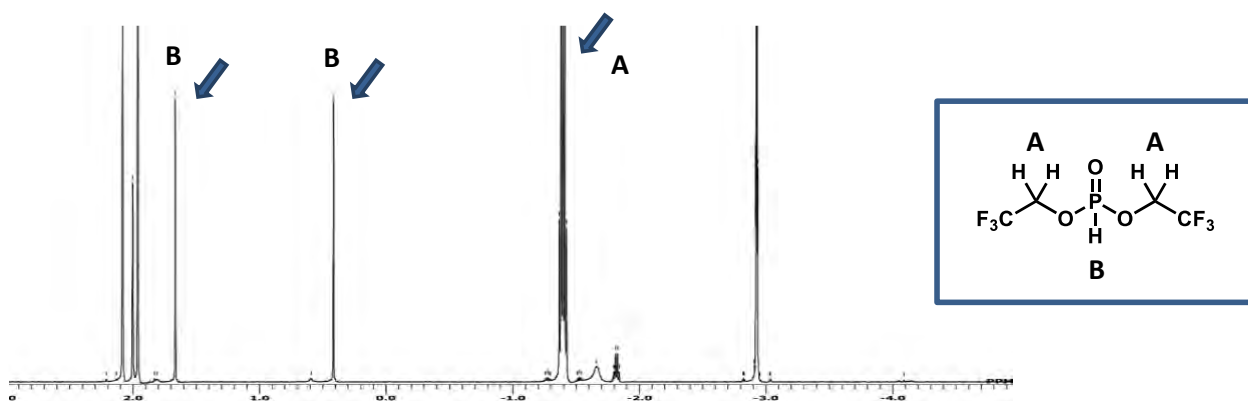

**Figure S4-1.**  $^1\text{H}$  NMR spectrum of  $(\text{CF}_3\text{CH}_2\text{O})_2(\text{H})\text{P}=\text{O}$  in Toluene- $d_8$  (Reference)

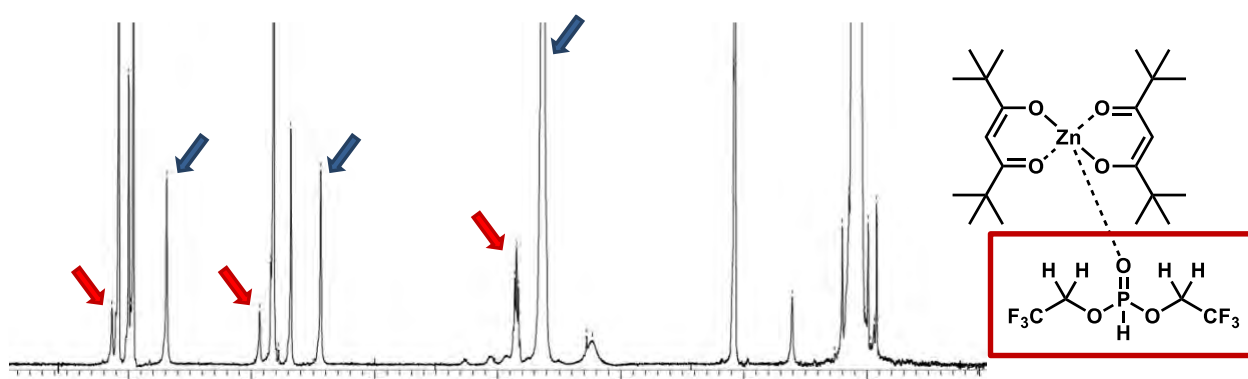

**Figure S4-2.**  $^1\text{H}$  NMR spectrum of  $(\text{CF}_3\text{CH}_2\text{O})_2(\text{H})\text{P}=\text{O}$  +  $\text{Zn}(\text{TMHD})_2$  1 equiv. in Toluene- $d_8$

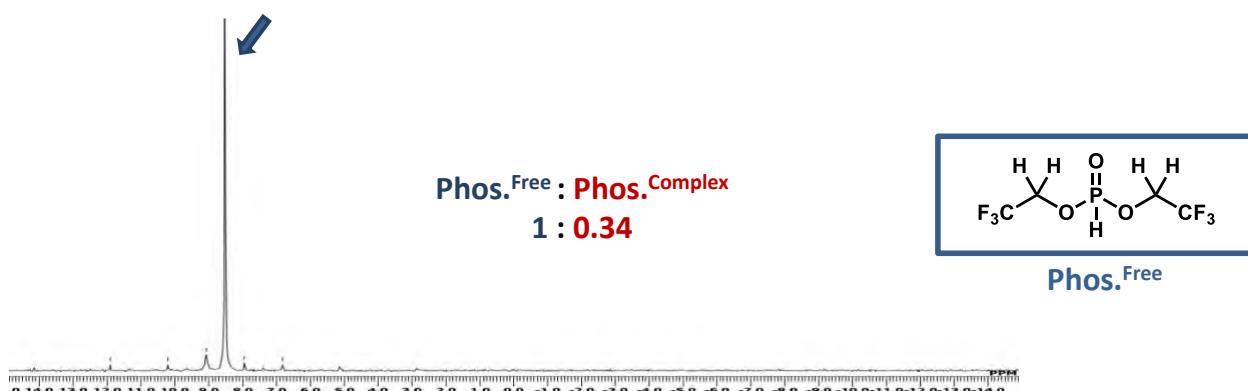

**Figure S5-1.**  $^{31}\text{P}$  NMR spectrum of  $(\text{CF}_3\text{CH}_2\text{O})_2(\text{H})\text{P}=\text{O}$  in Toluene- $\text{d}_8$  (Reference)

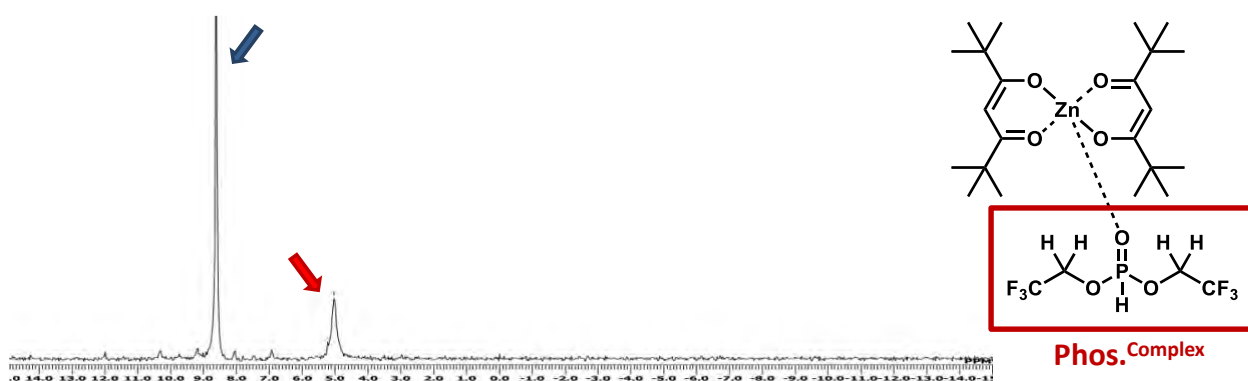

**Figure S5-2.**  $^{31}\text{P}$  NMR spectrum of  $(\text{CF}_3\text{CH}_2\text{O})_2(\text{H})\text{P}=\text{O}$  +  $\text{Zn}(\text{TMHD})_2$  1 equiv. in Toluene- $\text{d}_8$

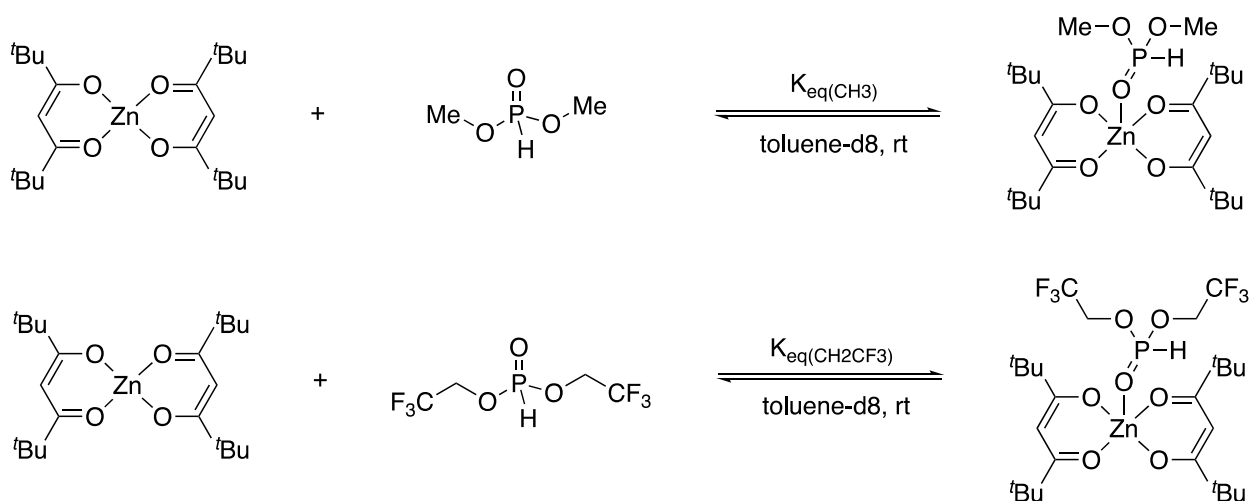

Based on the results of NMR experiments, we hypothesized that  $\text{Zn}(\text{TMHD})_2$  and phosphite formed complexes by the coordination of  $\text{P}=\text{O}$  to the Zn center.

Equilibrium constants  $K_{eq}(CH_3)$  and  $K_{eq}(CH_2CF_3)$  were calculated by the following equation. The concentration of each species was calculated based on  $^1H$  NMR.

$$K_{eq}(CH_3) = \frac{[Phos. Complex]}{[Free Zn(TMHD)_2][Free 2']} = 0.33 M^{-1}$$

$$K_{eq}(CH_2CF_3) = \frac{[Phos. Complex]}{[Free Zn(TMHD)_2][Free 2]} = 1.24 M^{-1}$$

**Table S6.** Summary of the phosphite-catalyst interaction parameters

| Phosphite                            | $K_{eq} (M^{-1})$ | $\Delta Shifts [Complex-Free Phosphite] (ppm)$ |
|--------------------------------------|-------------------|------------------------------------------------|
| Dimethyl phosphite<br>(2')           | 0.33              | 0.29                                           |
| Bis(trifluoroethyl) phosphite<br>(2) | 1.24              | 0.45                                           |

These observations lead us to hypothesize that the greater reactivity observed for bis(trifluoroethyl) phosphite when compared to dimethyl phosphite is due not solely to the leaving group ability of the substituents, but also to the favourable interaction parameters with the catalyst they bring about. Interestingly, the phosphite that would be expected to be the weakest Lewis base, with two electron-withdrawing trifluoroethyl substituents, is showing the strongest interaction with the Lewis acid, suggesting some additional interaction between BTP and the metal complex. While no such interaction can be observed or proposed presently, this matter is still under ongoing investigation.

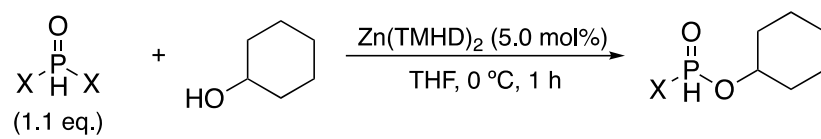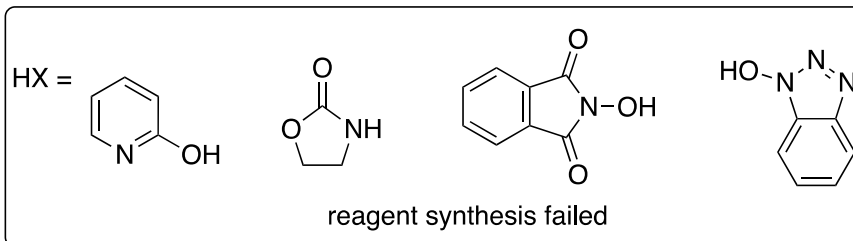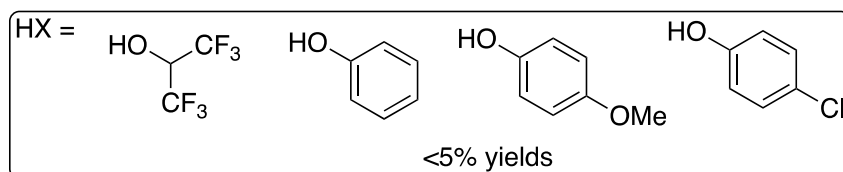

**Scheme S2.** Investigation of other leaving groups

## 6. Experimental Procedure

### 6-0. Synthesis of bis(2,2,2-trifluoroethyl) phosphite) **2** in a large scale<sup>11</sup>

To an oven-dried 3-neck flask equipped with a magnetic stirring bar and a dropping funnel was added  $\text{PCl}_3$  (20 mL, 229 mmol) under an Ar atmosphere. DCM (45 mL) was added and the flask was cooled in a water-ice bath. A solution of  $t\text{BuOH}$  (21.5 mL, 229 mmol) in DCM (22.5 mL) was added dropwise. The solution was stirred for 1 h at 0 °C and a solution of trifluoroethanol (33.3 mL, 457 mmol) in DCM (22.5 mL) was added at once. The solution was stirred for 12 h at room temperature. The solution was then stirred under reflux for 3 h. After cooling to room temperature, the solvent was removed by distillation at ambient pressure. The target compound was purified by distillation (2 mmHg, 40 °C) to obtain as a colorless oil (39.0 g, 69%).

### 6-1. A typical procedure of optimization of consecutive phosphorylation using **3a'** (Scheme 1)

To an oven-dried test tube equipped with a magnetic stirring bar was added  $\text{Zn}(\text{OAc})_2$  (1.4 mg, 0.0075 mmol) and powdered MS 5A (200 mg). The tube was capped with a septum, and connected to a vacuum line, then an Ar balloon was equipped. toluene (1.0 mL) was added to the tube, followed by the addition of cyclohexyl methyl phosphite **3a'** (106.9 mg, 0.60 mmol) and alcohol **1b** (32.4 mg, 0.30 mmol) by syringe. The reaction mixture was stirred for 18 h at room temperature. Then, the reaction mixture was diluted with ethyl acetate (5 mL). The solid material was removed by filtration and washed with ethyl acetate (5 mL\*2). The combined organic phase was evaporated and connected to a vacuum line. The  $^1\text{H}$  NMR was recorded with 1,3,5-trimethoxy benzene as an internal standard in  $\text{DMSO-}d_6$ . The yield of product **4a** was determined to be 85% by  $^1\text{H}$  NMR analysis.

### **6-2. A typical procedure of optimization of reaction conditions between phosphite 2 and cyclohexanol 1a (Table 1, entry 10)**

To an oven-dried test tube equipped with a magnetic stirring bar was added Zn(TMHD)<sub>2</sub> (3.2 mg, 0.0075 mmol). The tube was capped with a septum, and connected to a vacuum line, then an Ar balloon was equipped. DCM (1.0 mL) was added to the tube which was cooled down to 0 °C, followed by the addition of bis(2,2,2-trifluoroethyl) phosphite 2 (73.8 mg, 0.3 mmol) and cyclohexanol 1a (30.0 mg, 0.3 mmol) by syringe. The solution was stirred for 3 h at 0 °C. Then, the reaction mixture was concentrated under reduced pressure. The <sup>1</sup>H NMR was recorded with 1,3,5-trimethoxybenzene as the internal standard and the yield of 3a was calculated.

### **6-3. A general procedure of substrate scope of mono-phosphonylation using Zn(TMHD)<sub>2</sub> (Scheme 2, Conditions A)**

[For liquid alcohols]

To an oven-dried test tube equipped with a magnetic stirring bar was added Zn(TMHD)<sub>2</sub> (3.2 mg, 0.0075 mmol). The tube was capped with a septum, and connected to a vacuum line, then an Ar balloon was equipped. DCM (1.0 mL) was added to the tube which was cooled down to 0 °C, followed by the addition of bis(2,2,2-trifluoroethyl) phosphite) 2 (73.8 mg, 0.3 mmol) and alcohol 1 (0.3 mmol) by syringe. The solution was stirred for 3 h at 0 °C. Then, the reaction mixture was concentrated under reduced pressure. The <sup>1</sup>H NMR was recorded with 1,3,5-trimethoxybenzene as internal standard and the yield was calculated.

[For solid alcohols]

To an oven-dried test tube equipped with a magnetic stirring bar was added Zn(TMHD)<sub>2</sub> (3.2 mg, 0.0075 mmol) and alcohol 1 (0.3 mmol). The tube was capped with a septum, and connected to a vacuum line, then an Ar balloon was equipped. DCM (1.0 mL) was

added to the tube which was cooled down to 0 °C, followed by the addition of bis(2,2,2-trifluoroethyl) phosphite **2** (73.8 mg, 0.3 mmol) by syringe. The solution was stirred for 3 h at 0 °C. Then, the reaction mixture was concentrated under reduced pressure. The <sup>1</sup>H NMR was recorded with 1,3,5- trimethoxy as the internal standard and the yield was calculated.

#### **6-4. A general procedure of substrate scope of mono-phosphonylation using Zn(OPiv)<sub>2</sub> (Scheme 2, Conditions B)**

[For liquid alcohols]

To an oven-dried test tube equipped with a magnetic stirring bar was added Zn(OPiv)<sub>2</sub> (2.0 mg, 0.0075 mmol). The tube was capped with a septum, and connected to a vacuum line, then an Ar balloon was equipped. Toluene (1.0 mL) was added to the tube which was cooled down to -20 °C, followed by the addition of bis(2,2,2-trifluoroethyl) phosphite **2** (81.2 mg, 0.33 mmol) and alcohol **1** (0.3 mmol) by syringe. The solution was stirred for 22 h at -20 °C, after which full consumption of the alcohol was confirmed by TLC. Then, the reaction mixture was concentrated under reduced pressure. The <sup>1</sup>H NMR was recorded with 1,3,5- trimethoxybenzene as the internal standard and the yield was calculated.

[For solid alcohols]

To an oven-dried test tube equipped with a magnetic stirring bar was added Zn(OPiv)<sub>2</sub> (2.0 mg, 0.0075 mmol) and alcohol **1** (0.3 mmol). The tube was capped with a septum, and connected to a vacuum line, then an Ar balloon was equipped. Toluene (1.0 mL) was added to the tube which was cooled down to -20 °C, followed by the addition of bis(2,2,2-trifluoroethyl) phosphite **2** (81.2 mg, 0.33 mmol) by syringe. The solution was stirred for 22 h at -20 °C, after which full consumption of the alcohol was confirmed by TLC. Then, the reaction mixture was concentrated under reduced pressure. The <sup>1</sup>H NMR was recorded with 1,3,5- trimethoxybenzene as the internal standard and the yield was calculated.



**6-5. A general procedure of substrate scope of mono-phosphonylation using Zn(TMHD)<sub>2</sub> (Scheme 2, Conditions C)**

[For liquid alcohols]

To an oven-dried test tube equipped with a magnetic stirring bar was added Zn(TMHD)<sub>2</sub> (3.2 mg, 0.0075 mmol). The tube was capped with a septum, and connected to a vacuum line, then an Ar balloon was equipped. DCM (1.0 mL) was added to the tube, followed by the addition of bis(2,2,2-trifluoroethyl) phosphite **2** (11.7 mg, 0.45 mmol) and alcohol **1** (0.3 mmol) by syringe. The solution was stirred for 3 h at rt. Then, the reaction mixture was concentrated under reduced pressure. The <sup>1</sup>H NMR was recorded with 1,3,5-trimethoxybenzene as the internal standard and the yield was calculated.

[For solid alcohols]

To an oven-dried test tube equipped with a magnetic stirring bar was added Zn(TMHD)<sub>2</sub> (3.2 mg, 0.0075 mmol) and alcohol **1** (0.3 mmol). The tube was capped with a septum, and connected to a vacuum line, then an Ar balloon was equipped. DCM (1.0 mL) was added to the tube, followed by the addition of bis(2,2,2-trifluoroethyl) phosphite **2** (110.7 mg, 0.45 mmol) by syringe. The solution was stirred for 3 h at rt. Then, the reaction mixture was concentrated under reduced pressure. The <sup>1</sup>H NMR was recorded with 1,3,5-trimethoxy as internal standard and the yield was calculated.

**6-6. A general procedure of substrate scope of mono-phosphonylation using Zn(OPiv)<sub>2</sub> (Scheme 2, Conditions D)**

To an oven-dried test tube equipped with a magnetic stirring bar was added Zn(OPiv)<sub>2</sub> (4.0 mg, 0.015 mmol) and alcohol **1** (0.3 mmol). The tube was capped with a septum, and connected to a vacuum line, then an Ar balloon was equipped. DCM (1.0 mL) was added to the tube which was cooled down to 0 °C, followed by the addition of bis(2,2,2-trifluoroethyl) phosphite **2** (81.2 mg, 0.33 mmol) by syringe. The solution was stirred for

19 h at 0 °C, after which full consumption of the alcohol was confirmed by TLC. Then, the reaction mixture was concentrated under reduced pressure. The <sup>1</sup>H NMR was recorded with 1,3,5- trimethoxybenzene as the internal standard and the yield was calculated.

### 6-7. A procedure of synthesis of **3a** in a large scale

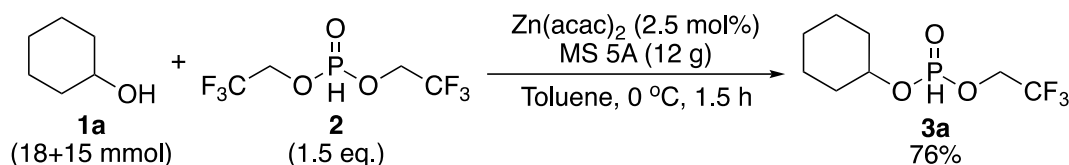

To an oven-dried 2-neck round bottom flask (200 mL) equipped with a magnetic stirring bar was added powdered MS 5A (12 g). The flask was connected to a vacuum line, heated by a heat gun, then an Ar balloon was equipped. A solution of Zn(acac)<sub>2</sub> (237.2 mg, 0.9 mmol) in toluene (60 mL) was added to the flask, followed by the addition of bis(2,2,2-trifluoroethyl) phosphite **2** (6.64 g, 27 mmol) and cyclohexanol **1a** (1.80 g, 18 mmol) by syringe. The reaction mixture was stirred for 1.5 h at room temperature. The solid material was removed by filtration and washed with ethyl acetate (20 mL\*3). The combined organic phase was evaporated and connected to a vacuum line. The <sup>1</sup>H NMR was recorded. The same reaction was performed in a 15 mmol scale for 3 h and combined crude was carefully purified by column chromatography using DCM/ethyl acetate = 9/1 as eluent. The product **3a** was isolated as a colorless oil. (6.18 g, 25.1 mmol, 76% yield)

### 6-8. A typical procedure of optimization of second substitution reaction conditions (Table 2, entry 5)

To an oven-dried test tube equipped with a magnetic stirring bar was added Zn(TMHD)<sub>2</sub> (2.0 mg, 0.0075 mmol). The tube was capped with a septum, and connected to a vacuum line, then an Ar balloon was equipped. Toluene (1.0 mL) was added to the tube, followed by the addition of cyclohexyl (2,2,2-trifluoroethyl) phosphite **3a** (81.2 mg, 0.33 mmol) and benzyl alcohol **11** (32.4 mg, 0.30 mmol) by syringe. The reaction mixture was stirred for 3 hours at room temperature after which full consumption of the alcohol was

confirmed by TLC. Then, the reaction mixture was concentrated under reduced pressure. The  $^1\text{H}$  NMR was recorded with 1,2,4,5-tetramethyl benzene as the internal standard and the yield of **4a** was calculated. The product could be isolated by column chromatography in 92% yield.

### **6-9. A typical procedure of substrate scope of the one-pot phosphonylation reaction (Scheme 3)**

To an oven-dried test tube equipped with a magnetic stirring bar was added  $\text{Zn}(\text{TMHD})_2$  (4.9 mg, 0.01125 mmol). The tube was capped with a septum, and connected to a vacuum line, then an Ar balloon was equipped. Toluene (1.2 mL) was added to the tube which was cooled down to 0 °C, followed by the addition of bis(2,2,2-trifluoroethyl) phosphite) **2** (110.7 mg, 0.45 mmol) and secondary **1** (0.45 mmol) by syringe. The solution was stirred for 3 h at 0 °C. This solution was then transferred to a separate test tube containing primary alcohol **1** (0.30 mmol) and  $\text{Zn}(\text{TMHD})_2$  (3.2 mg, 0.0075 mmol) by syringe and the syringe was rinsed with toluene (2\*0.15 mL). The solution was stirred for 3 h at 0 °C, after which full consumption of the primary alcohol **1** was confirmed by TLC. Then, the reaction mixture was put to a pad of silica gel and the product **4** was purified by column chromatography.

### **6-10. A procedure of the one-pot phosphonylation reaction and oxidation reaction with carbohydrates (Scheme 4a)**

To a flame-dried test tube was added alcohol **1s** (117.1 mg, 0.3 mmol) in a grove box. The tube was put in a dry chamber for 10 minutes and to the tube was added  $\text{Zn}(\text{TMHD})_2$  (9.7 mg, 0.0225 mmol). The tube was equipped with a stir bar capped with a septum and taken out from the grove box. An argon balloon was equipped. THF (1.0 mL) was added to the tube and it was cooled down to 0 °C, followed by the addition of bis(trifluoroethyl) phosphite **2** (81.2 mg, 0.33 mmol) by syringe. The solution was stirred at 0 °C for 2.5 h.

Zn(TMHD)<sub>2</sub> (12.9 mg, 0.03 mmol) in THF (0.3 mL) was transferred by cannulation with THF (2\*0.1 mL), followed by the addition of alcohol **1t** (110.3 mg, 0.54 mmol). The solution was stirred at 0 °C for 15 h. Then, the reaction mixture was diluted with hexane (5 mL) and put on a pad of silica gel. The fractions containing Zn(TMHD)<sub>2</sub> were removed with the elution of ethyl acetate/hexane (1:4) (15 mL) and the remaining compounds were collected with the elution of ethyl acetate (70 mL). The latter was concentrated under reduced pressure and the reaction crude was analyzed by <sup>1</sup>H NMR with durene as an internal standard.

To a 20 mL, 2-neck round bottom flask was transferred the crude with DCM and the solvent was removed under reduced pressure. The flask was equipped with a stir bar and capped with a septum. An argon balloon was equipped, followed by the addition of anhydrous alcohol (3 mL) and DCM (1 mL). To the flask anhydrous pyridine (71.3 mg, 0.9 mmol) was added by syringe, followed by the immediate addition of I<sub>2</sub> (91.3 mg, 0.36 mmol). The solution was stirred at room temperature for 40 min. Then, the reaction mixture was quenched by saturated Na<sub>2</sub>S<sub>2</sub>O<sub>3</sub> aq. (2 mL) and extracted by DCM (10 mL\*3). The combined organic layer was washed with brine, dried with Na<sub>2</sub>SO<sub>4</sub>, filtered, and concentrated under reduced pressure. The reaction crude was purified by column chromatography and PTLC.

### 6-11. A procedure of the preparation of phosphite **3s** in a large scale

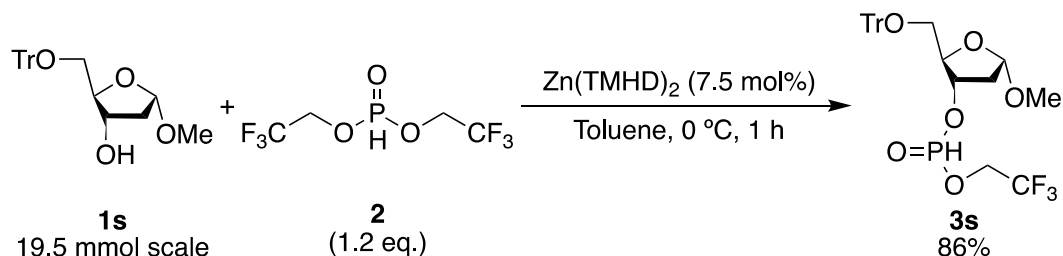

To an oven-dried 300 mL 2-neck round bottom flask was added alcohol **1s** (7.61 g, 19.5 mmol). This flask was put into a grove box and was added Zn(TMHD)<sub>2</sub> (631.3 mg, 1.46 mmol). The flask was equipped with a stir bar, capped with a septum and a three-way cock, and taken out from the grove box. An argon balloon was equipped. Toluene

(65 mL) was added to the flask and it was cooled down to 0 °C, followed by the addition of bis(trifluoroethyl) phosphite **2** (5.75 g, 23.4 mmol) by syringe. The solution was stirred at 0 °C for 1 h. The reaction mixture was concentrated under reduced pressure, and the crude was purified by silica gel column chromatography (ethyl acetate/hexane (5:2 to 2:1)) to afford **3s** (4.61 g, 86%) as a white gum.

#### 6-12. A procedure of the synthesis of phosphite **4n** as an authentic sample

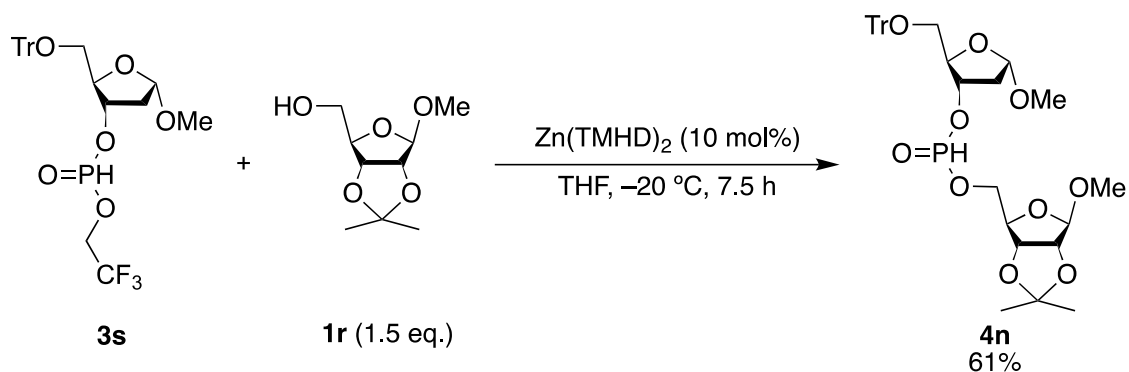

To a flame-dried test tube was added phosphite **3s** (171.1 mg, 0.3 mmol) in a grove box. The tube was put in a dry chamber for 10 minutes and to the tube was added  $\text{Zn(TMHD)}_2$  (12.9 mg, 0.03 mmol). The tube was equipped with a stir bar and capped with a septum and taken out from the grove box. An argon balloon was equipped. THF (1.0 mL) was added to the tube and it was cooled down to  $-20\text{ }^\circ\text{C}$ , followed by the addition of alcohol **1r** (91.9 mg, 0.45 mmol). The solution was stirred at  $-20\text{ }^\circ\text{C}$  for 7.5 h. Then, the reaction mixture was diluted with hexane (5 mL) and put on a pad of silica gel. The fractions containing  $\text{Zn(TMHD)}_2$  were removed with the elution of ethyl acetate/hexane (1:4) (15 mL) and the remaining compounds were collected with the elution of ethyl acetate (70 mL). The latter was concentrated under reduced pressure and the reaction crude was analyzed by  $^1\text{H}$  NMR with durene as an internal standard. Then, the crude was purified by silica gel column chromatography (ethyl acetate/hexane (3:1 to 1:1)) to afford **4n** (116.6 mg, 61%) as a white gum.

#### 6-13. A procedure of the one-pot phosphorylation reaction (Scheme 4b)

To a flame-dried test tube was added  $\text{Zn(TMHD)}_2$  (3.2 mg, 0.0075 mmol) and alcohol **1ad** (75.7 mg, 0.3 mmol) in a grove box. The tube was equipped with a stir bar and capped with a septum and taken out from the grove box. An argon balloon was equipped. THF (0.6 mL) was added to the tube and it was cooled down to 0 °C, followed by the addition

of bis(trifluoroethyl) phosphite **2** (81.2 mg, 0.33 mmol) by syringe. The solution was stirred at 0 °C for 3 h. Zn(TMHD)<sub>2</sub> (3.2 mg, 0.0075 mmol) in THF (0.2 mL) was transferred by cannulation with THF (2\*0.1 mL), followed by the addition of alcohol **1ae** (49.2 mg, 0.36 mmol). The solution was stirred at rt for 6 h. Then, the reaction mixture was diluted with hexane (5 mL) and put on a pad of silica gel. The fractions containing Zn(TMHD)<sub>2</sub> were removed with the elution of ethyl acetate/hexane (1:4) (15 mL) and the remaining compounds were collected with the elution of ethyl acetate (70 mL). The latter was concentrated under reduced pressure and the reaction crude was analyzed by <sup>1</sup>H NMR with durene as an internal standard. The crude material was purified by pTLC (Hex: EA = 1:1) to afford target compound **4o** as white foam (114.7 mg, 87% yield).

#### **6-14. A procedure of the oxidation with benzyl alcohol (Scheme 4b)**

To a 10 mL, 2-neck round bottom flask was transferred **4o** (114.0 mg, 0.25 mmol) with THF and the solvent was removed under reduced pressure. The flask was equipped with a stir bar and capped with a septum. An argon balloon was equipped, followed by the addition of a solution of I<sub>2</sub> (78.7 mg, 0.31 mmol), pyridine (40.8 mg, 0.516 mmol), and benzyl alcohol (164.7 mg, 1.548 mmol) in THF (0.7 mL). The solution was stirred at room temperature for 6 h. Then, the reaction mixture was quenched by saturated Na<sub>2</sub>S<sub>2</sub>O<sub>3</sub> aq. (2 mL) and extracted by DCM (10 mL\*3). The combined organic layer was washed with brine, dried with Na<sub>2</sub>SO<sub>4</sub>, filtered, and concentrated under reduced pressure. The reaction crude was purified by column chromatography and PTLC (Hex: EA = 1:1) to afford the target compound **5c** as a white foam (88.1 mg, 64% yield).

#### **6-15. A procedure of the hydrogenolysis of benzylphosphate (Scheme 4b)**

To a 10 mL, the 2-neck round bottom flask was transferred **5d** (88.0 mg, 0.16 mmol) with Ethyl Acetate (0.5 mL). The flask was equipped with a stir bar and capped with a septum. An argon balloon was equipped, followed by the addition of Pd/C (10 mg). The

atmosphere was purged with H<sub>2</sub> and the solution was stirred at room temperature for 18 h. Then, the reaction mixture was filtered through Celite and washed with MeOH. The combined organic layer was concentrated under reduced pressure to afford the target compound **5e** as a white foam (65.9 mg, 91% yield).

#### **6-16. A procedure of the hydrolysis of methyl ester (Scheme 4b)**

To a 10 mL, 2-neck round bottom flask was transferred **5c** (88.0 mg, 0.16 mmol) with THF (0.5 mL) and the solvent was removed under reduced pressure. The flask was equipped with a stir bar and capped with a septum. An argon balloon was equipped, followed by the addition of a solution of LiOH (11.7 mg, 0.32 mmol) in water (0.7 mL). The solution was stirred at room temperature for 18 h. Then, the reaction mixture was quenched by 0.5 N HCl aq. and extracted by DCM (10 mL\*3). The combined organic layer was washed with brine, dried with Na<sub>2</sub>SO<sub>4</sub>, filtered, and concentrated under reduced pressure to afford the target compound **5c** as a white foam (70.4 mg, 82% yield).

#### **6-17. A procedure of the one-pot phosphonylation reaction and phosphorothioate synthesis (Scheme 4c)**

To an oven-dried test tube equipped with a magnetic stirring bar was added Zn(TMHD)<sub>2</sub> (2.0 mg, 0.0075 mmol). The tube was capped with a septum, and connected to a vacuum line, then an Ar balloon was equipped. Toluene (1.0 mL) was added to the tube, followed by the addition of cyclohexyl (2,2,2-trifluoroethyl) phosphite **3a** (81.2 mg, 0.33 mmol) and benzyl alcohol **11** (32.4 mg, 0.30 mmol) by syringe. The reaction mixture was stirred for 3 hours at room temperature after which full consumption of the alcohol was confirmed by TLC. A solution of S<sub>8</sub> (10.6 mg, 0.36 mmol) in EtOAc (2.0 mL) was added to the reaction mixture. After the addition of NEt<sub>3</sub> (91.1 mg, 0.9 mmol), the reaction mixture was stirred for 12 h. The reaction mixture was concentrated under reduced

pressure. The product could be isolated by column chromatography in 81% yield (93.4 mg).

#### 6-18. A procedure of the synthesis of thymidine derivative **1ad**

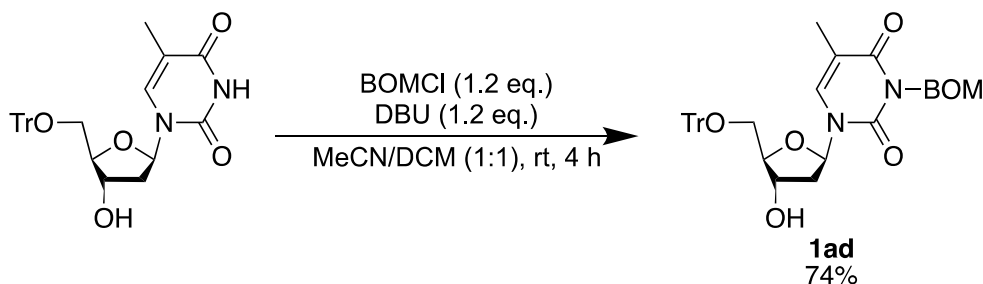

To a 200 mL two-neck round bottom flask equipped with a stir bar and an argon balloon, 5'-O-Tr-thymidine<sup>[12]</sup> (4.21 g, 7.91 mmol), acetonitrile (25 mL), and DCM (25 mL) were added. DBU (1.45 g, 1.42 mL 9.49 mmol) was added to the suspension to form a clear solution. The solution was cooled by a water bath, and benzyl chloromethyl ether (BOMCl, 1.49 g, 1.30 mL, 9.49 mmol) was added over 5 minutes and stirred for 4 h. The reaction mixture was diluted with ethyl acetate (120 ml) and washed with water (2\*40 ml) and saturated NaHCO<sub>3</sub> aq. (40 ml). The organic layer was dried over Na<sub>2</sub>SO<sub>4</sub>, filtered, and concentrated under reduced pressure. The crude was purified by column chromatography (diethyl ether/hexane (4:1)) to afford **1ad** (3.65 g, 74%) as a white solid.

Mp: 139-141 °C; <sup>1</sup>H NMR (600 MHz, CDCl<sub>3</sub>): δ 7.53 (1H, s), 7.42 (6H, d, *J* = 7.6 Hz), 7.39 (2H, d, *J* = 7.6 Hz), 7.33 (8H, t, *J* = 7.6 Hz), 7.29 (6H, t, *J* = 6.9 Hz), 6.42 (1H, t, *J* = 6.9 Hz), 5.51 (2H, s), 4.72 (2H, s), 4.57 (1H, td, *J* = 6.5, 3.2 Hz), 4.05 (1H, q, *J* = 3.2 Hz), 3.50 (1H, dd, *J* = 10.3, 3.4 Hz), 3.40 (1H, dd, *J* = 10.7, 3.1 Hz), 2.42 (1H, ddd, *J* = 13.7, 6.2, 3.4 Hz), 2.30 (1H, quintet, *J* = 6.9 Hz), 1.90 (1H, d, *J* = 4.1 Hz), 1.52 (3H, s); <sup>13</sup>C NMR (125 MHz, CDCl<sub>3</sub>): δ 163.5, 150.9, 143.2, 137.9, 134.4, 128.6, 128.2, 128.0, 127.61, 127.58, 127.4, 110.4, 87.4, 85.9, 85.3, 72.1(\*2), 70.5, 63.6, 41.0, 12.5; HRMS (DART): *m/z* calcd. for C<sub>37</sub>H<sub>37</sub>N<sub>2</sub>O<sub>6</sub> ([M+H]<sup>+</sup>): 605.26516; found: 605.26761; IR (neat):



3443, 3062, 3032, 2926, 1707, 1645, 1490, 1467, 1450, 1362, 1278, 1154, 1091, 1028, 901, 773, 747, 700, 633, 568, 426 cm<sup>-1</sup>.

### 6-19. A procedure of the synthesis of cytidine derivative 1aa

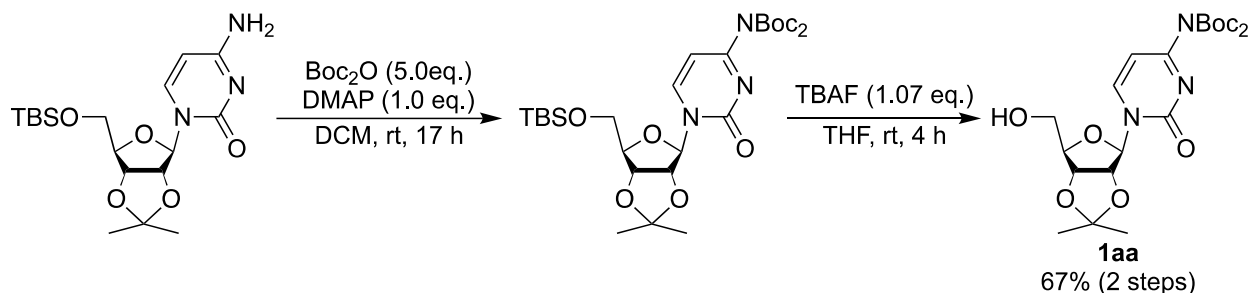

To a 300 mL two-neck round bottom flask equipped with a stir bar, 5'-O-(*tert*-butyldimethylsilyl)-2',3'-O-isopropylidene cytidine<sup>[13]</sup> (2.05 g, 5.15 mmol) and DMAP (635.3 mg, 5.2 mmol) was added and the flask was connected to a vacuum line. To the flask was equipped an argon balloon and was added DCM (100 mL). Boc<sub>2</sub>O (5.67 g, 26.0 mmol) was added and the mixture was stirred at room temperature for 17 h. It was quenched with water (10 mL) and extracted with DCM (50 mL\*2). The combined organic layer was washed with brine, dried over Na<sub>2</sub>SO<sub>4</sub>, filtered, and concentrated under reduced pressure. The crude was purified by column chromatography (ethyl acetate/hexane (1:4)) and a white solid (2.35 g) was obtained.

To a 300 mL two-neck round bottom flask equipped with a stir bar, obtained white solid (2.35 g) was added and the flask was connected to a vacuum line. To the flask was equipped an argon balloon and was added THF (100 mL). TBAF (1.0 M THF solution, 4.23 mL, 4.23 mmol) was added and stirred at room temperature for 4 h. The reaction mixture was diluted with ethyl acetate (100 mL) and washed with brine. The organic layer was dried over Na<sub>2</sub>SO<sub>4</sub>, filtered, and concentrated under reduced pressure. The crude was

purified by column chromatography (ethyl acetate/hexane (1:1)) to afford cytidine derivative **1aa** (1.70 g, 67% in two steps) as a white solid.

Mp: 94-100 °C; <sup>1</sup>H NMR (500 MHz, CDCl<sub>3</sub>): δ 7.62 (1H, d, *J* = 7.4 Hz), 7.11 (1H, d, *J* = 7.4 Hz), 5.43 (1H, d, *J* = 2.6 Hz), 5.21 (1H, dd, *J* = 6.4, 2.6 Hz), 5.07 (1H, q, *J* = 3.3 Hz), 4.32 (1H, dd, *J* = 5.9, 3.3 Hz), 3.90 (1H, dd, *J* = 12.2, 2.3 Hz), 3.79 (1H, dd, *J* = 12.2, 3.4 Hz), 3.60-3.30 (1H, br), 1.55 (3H, s), 1.54 (18H, s), 1.32 (3H, s); <sup>13</sup>C NMR (125 MHz, CDCl<sub>3</sub>): δ 163.0, 154.3, 149.3, 147.1, 114.0, 99.5, 96.4, 88.3, 85.3, 83.5, 80.4, 62.9, 27.7, 27.2, 25.2; HRMS (DART): *m/z* calcd. for C<sub>22</sub>H<sub>34</sub>N<sub>3</sub>O<sub>9</sub> ([M+H]<sup>+</sup>): 484.23621; found: 484.23136; IR (neat): 2982, 2938, 1778, 1743, 1652, 1624, 1527, 1457, 1395, 1371, 1320, 1260, 1214, 1157, 1117, 1083, 958, 850, 788, 744, 591, 513, 403 cm<sup>-1</sup>.

#### 6-20. A procedure of the preparation of phosphite **3ad** in a large scale

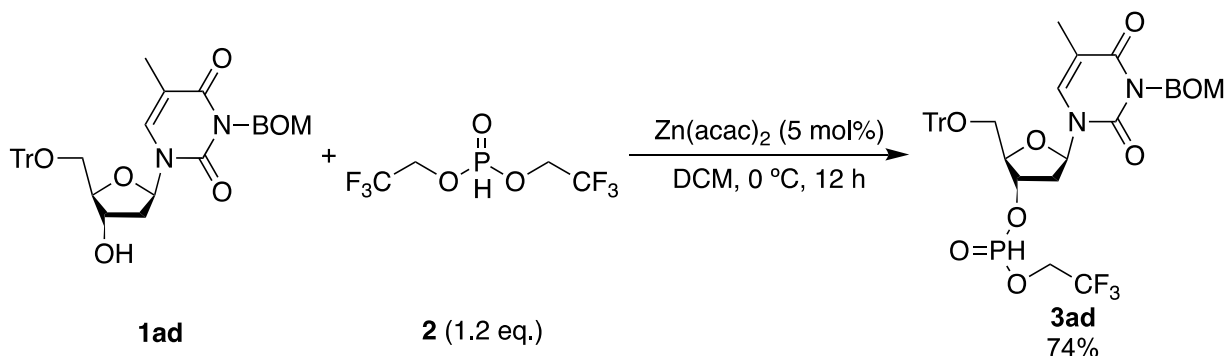

To a flame-dried 20 mL round bottom flask was added alcohol **1af** (614.3 mg, 1.0 mmol) in a grove box. The tube was put in a dry chamber for 10 minutes and to the tube was added Zn(acac)<sub>2</sub> (13.2 mg, 0.05 mmol). The tube was equipped with a stir bar and capped with a septum and taken out from the grove box. An argon balloon was equipped. DCM (1.0 mL) was added to the tube and it was cooled down to 0 °C, followed by the addition of bis(trifluoroethyl) phosphite **2** (295.8 mg, 0.36 mmol) by syringe. The solution was stirred at 0 °C for 12 h. The solution was diluted with DCM (20 mL). Then, the reaction mixture was concentrated under reduced pressure. The reaction crude was analyzed by <sup>1</sup>H NMR with durene as an internal standard. Then, the crude was purified by silica gel column chromatography (ethyl acetate/hexane (4:1 to 1:1)) to afford **3af** (576.0 mg, 74% yield) as a white solid.

### 6-21. A procedure of the synthesis of phosphites 6 as authentic samples

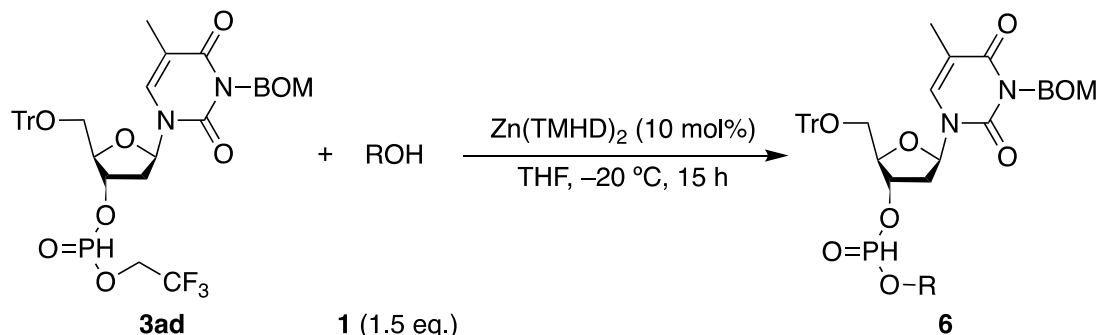

To a flame-dried test tube was added phosphite **3af** (248.8 mg, 0.3 mmol) and nucleoside **1ae** (217.6 mg, 0.45 mmol) or **1aa** (202.7 mg, 0.45 mmol) in the grove box. The tube was put into a dry chamber for 10 minutes and to the tube was added Zn(TMHD)<sub>2</sub> (13.0 mg, 0.03 mmol). The tube was equipped with a stir bar and capped with a septum and taken out from the grove box. An argon balloon was equipped. The tube was stirred for 1 min at room temperature and was cooled down to  $-20\text{ }^\circ\text{C}$ . THF (1.0 mL) was added to the tube and was stirred at  $-20\text{ }^\circ\text{C}$  for 15 h. Then, the reaction mixture was diluted with hexane (5 mL) and put on a pad of silica gel. The fractions containing Zn(TMHD)<sub>2</sub> were removed with the elution of ethyl acetate/hexane (1:4) (15 mL) and the remaining compounds were collected with the elution of ethyl acetate (80 mL). The latter was concentrated under reduced pressure and the reaction crude was analyzed by <sup>1</sup>H NMR with durene as an internal standard. Then, the crude was purified by silica gel column chromatography to afford **6**.

### 6-22. A procedure of the one-pot phosphonylation reaction and oxidation reaction with nucleosides (Scheme 4d)

To a flame-dried test tube A was added nucleoside **1af** (183.9 mg, 0.3 mmol) in a grove box. The tube A was put in a dry chamber for 10 minutes and to the tube was added Zn(acac)<sub>2</sub> (4.0 mg, 0.015 mmol). The tube A was equipped with a stir bar and capped with a septum and taken out from the grove box. An argon balloon was equipped. THF (1.0 mL) was added to the tube A and it was cooled down to  $0\text{ }^\circ\text{C}$ , followed by the addition of bis(trifluoroethyl) phosphite **2** (88.6 mg, 0.36 mmol) by syringe. The solution was stirred at  $0\text{ }^\circ\text{C}$  for 15 h. To another flame-dried test tube B was added nucleoside **1ae** or

**1aa** (0.6 mmol) in the grove box. The tube B was put in a dry chamber for 10 minutes, followed by the addition of  $\text{Zn}(\text{TMHD})_2$  (12.9 mg, 0.03 mmol). The tube B was equipped with a stir bar, capped with a septum, and taken out from the grove box, then an argon balloon was equipped. The solution in the tube A was transferred to the tube B by cannulation with THF (4\*0.125 mL). The solution was stirred at rt for 24 h. Then, the reaction mixture was diluted with DCM (1 mL) and hexane (1 mL) and put on a pad of silica gel. The fractions containing  $\text{Zn}(\text{TMHD})_2$  were removed with the elution of ethyl acetate/hexane (1:6) (15 mL) and the remaining compounds were collected with the elution of ethyl acetate (80 mL). The latter was concentrated under reduced pressure and the reaction crude was analyzed by  $^1\text{H}$  NMR with durene as an internal standard.

To a 20 mL, 2-neck round bottom flask was transferred the crude with DCM and the solvent was removed under reduced pressure. The flask was equipped with a stir bar and capped with a septum. An argon balloon was equipped, followed by the addition of DCM (1 mL) and anhydrous ethanol (3 mL). To the flask anhydrous pyridine (71.3 mg, 0.9 mmol) was added by syringe, followed by the immediate addition of  $\text{I}_2$  (91.3 mg, 0.36 mmol). The solution was stirred at room temperature for 40 min. Then, the reaction mixture was quenched by saturated  $\text{Na}_2\text{S}_2\text{O}_3$  aq. (2 mL) and extracted by DCM (10 mL\*3). The combined organic layer was washed with brine, dried with  $\text{Na}_2\text{SO}_4$ , filtered, and concentrated under reduced pressure. The reaction crude was analyzed by  $^1\text{H}$  NMR with 1,3,5-trimethoxybenzene as an internal standard. Then, the crude was purified by silica gel column chromatography and PTLC.

## 7. Product data

Due to the difficulty of isolation, the NMR spectra of **3b-3r**, **3t-3z** and **3aa-3ac** were recorded in the crude product state, and 1,3,5-trimethoxybenzene ( $^1\text{H}$  NMR:  $\delta$  6.11 (3H, s), 3.79 (9H, s);  $^{13}\text{C}$  NMR:  $\delta$  161.7, 93.2, 55.5 in  $\text{DMSO-}d_6$ ) or durene ( $^1\text{H}$  NMR:  $\delta$  6.89 (2H, s), 2.18 (12H, s);  $^{13}\text{C}$  NMR:  $\delta$  133.6, 131.1, 19.0 in  $\text{CDCl}_3$ ) was added as an internal standard.

### Cyclohexyl (2,2,2-trifluoroethyl) phosphonate (**3a**)

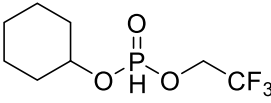 $^1\text{H}$  NMR (600 MHz,  $\text{CDCl}_3$ ):  $\delta$  6.96 (1H, d,  $J_{\text{P-H}} = 720.3$  Hz), 4.60-4.50 (1H, m), 4.47-4.35 (2H, m), 2.01-1.88 (2H, m), 1.82-1.70 (2H, m), 1.68-1.48 (3H, m), 1.42-1.21 (3H, m);  $^{13}\text{C}$  NMR (150 MHz,  $\text{CDCl}_3$ ):  $\delta$  122.6 (qd,  $J = 277.4, 7.2$  Hz), 77.0 (d,  $J = 5.8$  Hz), 61.6 (qd,  $J = 38.3, 5.8$  Hz), 33.5 (d,  $J = 4.3$  Hz), 33.4 (d,  $J = 4.3$  Hz), 24.84, 24.83, 23.3;  $^{19}\text{F}$  NMR (565 MHz,  $\text{CDCl}_3$ ):  $\delta$  -75.25 (s);  $^{31}\text{P}$  NMR (240 MHz,  $\text{CDCl}_3$ ):  $\delta$  6.77; HRMS (APCI-) calcd for  $\text{C}_8\text{H}_{13}\text{F}_3\text{O}_3\text{P}$  ( $[\text{M-H}]^-$ ): 245.0554; found: 245.0647; IR (neat): 2940, 2863, 2445, 1452, 1256, 1171, 1110, 981, 657  $\text{cm}^{-1}$ .

### Cyclopentyl (2,2,2-trifluoroethyl) phosphonate (**3b**)

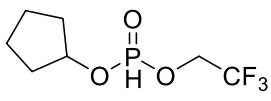 $^1\text{H}$  NMR (600 MHz,  $\text{DMSO-}d_6$ ):  $\delta$  6.98 (1H, d,  $J_{\text{P-H}} = 721.7$  Hz), 4.96-4.93 (1H, m), 4.68-4.61 (2H, m), 1.82-1.74 (4H, m), 1.71-1.63 (2H, m), 1.61-1.52 (2H, m);  $^{13}\text{C}$  NMR (125 MHz,  $\text{DMSO-}d_6$ ):  $\delta$  123.3 (qd,  $J = 278.0, 8.4$  Hz), 79.5 (d,  $J = 6.0$  Hz), 60.9 (qd,  $J = 35.6, 3.6$  Hz), 33.5 (d,  $J = 4.8$  Hz), 33.4 (d,  $J = 6.0$  Hz), 22.5;  $^{19}\text{F}$  NMR (565 MHz,  $\text{DMSO-}d_6$ ):  $\delta$  -74.04;  $^{31}\text{P}$  NMR (243 MHz,  $\text{DMSO-}d_6$ ):  $\delta$  8.61; HRMS (APCI-) calcd for  $\text{C}_7\text{H}_{11}\text{F}_3\text{O}_3\text{P}$  ( $[\text{M-H}]^-$ ): 231.0398; found: 231.0403; IR (neat): 3046, 2716, 2158, 1344, 1205, 1128, 1087, 1011, 885, 700  $\text{cm}^{-1}$ .

### Cycloheptyl (2,2,2-trifluoroethyl) phosphonate (**3c**)

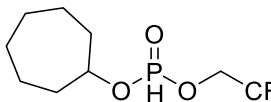 $^1\text{H}$  NMR (500 MHz,  $\text{DMSO-}d_6$ ):  $\delta$  6.91 (1H, d,  $J_{\text{P-H}} = 720.4$  Hz), 4.65-4.58 (1H, m), 4.52-4.45 (2H, m), 1.93-1.90 (2H, m), 1.78-1.70 (2H, m), 1.63-1.58 (6H, m), 1.39-1.36 (2H, m);  $^{13}\text{C}$  NMR (151 MHz,  $\text{DMSO-}d_6$ ):  $\delta$  123.4 (qd,  $J = 277.4, 8.4$  Hz), 78.3 (d,  $J = 7.2$  Hz), 61.0 (qd,  $J = 36.1, 4.3$  Hz), 35.2 (d,  $J = 4.3$  Hz), 35.1 (d,  $J = 4.3$  Hz), 27.51, 27.49, 21.6;  $^{19}\text{F}$  NMR (565 MHz,  $\text{DMSO-}d_6$ ):  $\delta$  -74.04;  $^{31}\text{P}$  NMR (243 MHz,  $\text{DMSO-}d_6$ ):  $\delta$  7.47; HRMS (APCI-) calcd for  $\text{C}_9\text{H}_{15}\text{F}_3\text{O}_3\text{P}$  ( $[\text{M-H}]^-$ ): 259.0711; found: 259.0733; IR (neat): 2932, 2863, 2430, 1462, 1284, 1260, 1171, 1111, 970, 868, 838, 753, 560  $\text{cm}^{-1}$ .

### (1*S*,2*R*,5*S*)-2-Isopropyl-5-methylcyclohexyl (2,2,2-trifluoroethyl) phosphonate (**3d**)

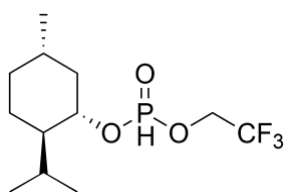

$^1\text{H}$  NMR (600 MHz,  $\text{DMSO-}d_6$ ):  $\delta$  7.03 (1H for one diastereomer, d,  $J_{\text{P-H}} = 722.6$  Hz), 7.01 (1H for the other diastereomer, d,  $J = 724.6$  Hz), 4.67-4.61 (2H, m), 4.26-4.21 (1H, m), 2.11-1.97 (2H, m), 1.61 (2H, d,  $J = 11.7$  Hz), 1.48-1.33 (1H, m), 1.32 (1H, t,  $J = 11.3$  Hz), 1.16 (2H, q,  $J = 13.5$  Hz), 0.98 (1H, q,  $J = 12.0$  Hz), 0.88 (6H, d,  $J = 6.9$  Hz), 0.75 (3H, q,  $J = 3.4$  Hz);  $^{13}\text{C}$  NMR (151 MHz,  $\text{DMSO-}d_6$ ):  $\delta$  123.3 (qd,  $J = 278.2, 9.4$  Hz), 77.84, 77.79, 77.6, 77.5, 61.5, 61.3, 61.22, 61.20, 61.10, 61.08, 60.99, 60.96, 60.86, 60.84, 60.74, 60.72, 60.62, 60.58, 47.7, 47.6, 42.5, 42.3, 33.33, 33.31, 30.88, 30.86, 26.96, 25.30, 25.2, 22.4, 21.7, 20.6, 20.5, 15.5, 15.4;  $^{19}\text{F}$  NMR (565 MHz,  $\text{DMSO-}d_6$ ):  $\delta$  -74.04;  $^{31}\text{P}$  NMR (243 MHz,  $\text{DMSO-}d_6$ ):  $\delta$  8.53, 8.34; HRMS (APCI-) calcd for  $\text{C}_{12}\text{H}_{21}\text{F}_3\text{O}_3\text{P}$  ( $[\text{M-H}]^-$ ): 301.1180; found: 301.1036; IR (neat): 2925, 1649, 1280, 1207, 1144, 1051, 1044, 1207, 933, 823, 760, 613  $\text{cm}^{-1}$ .

(1*S*,2*S*,4*R*)-Bicyclo[2.2.1]heptan-2-yl (2,2,2-trifluoroethyl) phosphonate (**3e**)

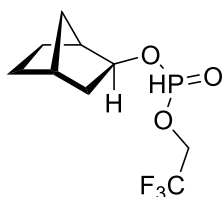

$^1\text{H}$  NMR (600 MHz,  $\text{DMSO-}d_6$ ):  $\delta$  6.98 (1H, d,  $J_{\text{P-H}} = 722.5$  Hz), 4.70-4.58 (2H, m), 4.42-4.40 (1H, m), 2.35-2.33 (1H, m), 2.25 (1H, s), 1.71-1.68 (1H, m), 1.50-1.44 (3H, m), 1.41-1.30 (1H, m), 1.18-1.08 (2H, m), 1.05-0.95 (2H, m);  $^{13}\text{C}$  NMR (151 MHz,  $\text{DMSO-}d_6$ ):  $\delta$  123.3 (qd,  $J = 277.8, 9.3$  Hz), 79.29, 79.26, 61.3, 61.1, 61.04, 61.02, 60.84, 60.81, 60.78, 60.6, 60.5, 42.5, 42.4, 42.33, 42.31, 40.04, 40.01, 39.98, 34.82, 34.81, 34.40, 34.38, 27.4, 25.6, 23.2;  $^{19}\text{F}$  NMR (565 MHz,  $\text{DMSO-}d_6$ ):  $\delta$  -73.98;  $^{31}\text{P}$  NMR (243 MHz,  $\text{DMSO-}d_6$ ):  $\delta$  8.23; HRMS (APCI-) calcd for  $\text{C}_9\text{H}_{13}\text{F}_3\text{O}_3\text{P}$  ( $[\text{M-H}]^-$ ): 257.0554; found: 257.0502; IR (neat): 2909, 1665, 1402, 1345, 1280, 1207, 1142, 1053, 1024, 1005, 931, 821, 758, 613  $\text{cm}^{-1}$ .

2,2,2-Trifluoroethyl ((1*S*,2*R*,4*S*)-1,7,7-trimethylbicyclo[2.2.1]heptan-2-yl) phosphonate (**3f**)

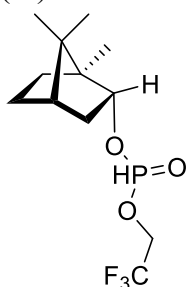

$^1\text{H}$  NMR (600 MHz,  $\text{DMSO-}d_6$ ):  $\delta$  7.018 (1H for one diastereomer, d,  $J_{\text{P-H}} = 726.8$  Hz), 7.031 (1H for the other diastereomer, d,  $J = 724.6$  Hz), 4.70-4.58 (3H, m), 2.27-2.26 (1H, m), 1.83-1.79 (1H, m), 1.71-1.66 (2H, m), 1.27-1.12 (3H, m), 0.84-0.80 (9H, m);  $^{13}\text{C}$  NMR (151 MHz,  $\text{DMSO-}d_6$ ):  $\delta$  123.3 (qd,  $J = 277.4, 8.7$  Hz), 82.2, 82.1, 82.03, 81.99, 61.0 (q,  $J = 36.1$  Hz), 49.2, 47.3, 44.57, 44.2, 36.4, 27.5, 19.6, 18.4, 12.89, 12.76;  $^{19}\text{F}$  NMR (565 MHz,  $\text{DMSO-}d_6$ ):  $\delta$  -74.01;  $^{31}\text{P}$  NMR (243 MHz,  $\text{DMSO-}d_6$ ):  $\delta$  9.85, 9.69; HRMS (APCI-) calcd for  $\text{C}_{12}\text{H}_{19}\text{F}_3\text{O}_3\text{P}$  ( $[\text{M-H}]^-$ ): 299.1024; found: 299.0938; IR (neat): 2532, 2333, 1654, 1397, 1341, 1278, 1207, 1134, 1050, 1025, 824, 761  $\text{cm}^{-1}$ .

Octan-2-yl (2,2,2-trifluoroethyl) phosphonate (**3g**)

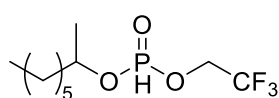

<sup>1</sup>H NMR (600 MHz, DMSO-*d*<sub>6</sub>) δ: 7.00 (1H, d, *J* = 721.70 Hz), 4.68-4.62 (2H, m), 4.59-4.55 (1H, m), 1.58-1.53 (2H, m), 1.30-1.22 (11H, m), 0.87-0.85 (3H, m); <sup>13</sup>C NMR (151 MHz, DMSO-*d*<sub>6</sub>): δ 123.3 (qd, *J* = 278.2, 9.4 Hz), 74.8 (for one diastereomer, d, *J* = 7.2 Hz), 74.7 (for the other diastereomer, d, *J* = 7.2 Hz), 61.00 (for one diastereomer, qd, *J* = 36.1, 4.3 Hz), 60.95 (for the other diastereomer, qd, *J* = 36.1, 2.9 Hz), 36.8 (for one diastereomer, d, *J* = 4.3 Hz), 36.7 (for the other diastereomer, d, *J* = 5.8 Hz), 31.1 (for both diastereomers), 28.4 (for both diastereomers), 24.5 (for one diastereomer), 24.4 (for the other diastereomer), 21.6 (for one diastereomer, d, *J* = 2.9 Hz), 21.5 (for the other diastereomer, d, *J* = 2.9 Hz), 14.0 (for both diastereomers); <sup>19</sup>F NMR (565 MHz, DMSO-*d*<sub>6</sub>) δ: -74.10; <sup>31</sup>P NMR (243 MHz, DMSO-*d*<sub>6</sub>) δ: 8.53, 8.47; HRMS (APCI-) calcd for C<sub>10</sub>H<sub>19</sub>F<sub>3</sub>O<sub>3</sub>P ([M-H]<sup>-</sup>): 275.1024; found: 275.0966; IR (neat): 2912, 2823, 2255, 1730, 1278, 1207, 1134, 1024, 1007, 823, 760, 624 cm<sup>-1</sup>.

#### 1-Phenylethyl (2,2,2-trifluoroethyl) phosphonate (**3h**)

<sup>1</sup>H NMR (600 MHz, DMSO-*d*<sub>6</sub>): δ 7.42-7.32 (5H, m), 7.04 (1H for one diastereomer, d, *J*<sub>P-H</sub> = 727.9 Hz), 7.03 (1H for one diastereomer, d, *J*<sub>P-H</sub> = 727.2 Hz), 5.76-5.67 (1H, m), 4.73-4.59 (1H, m), 4.59-4.50 (1H, m), 1.59 (3H for one diastereomer, d, *J* = 6.2 Hz), 7.03 (3H for one diastereomer, d, *J* = 6.2 Hz); <sup>13</sup>C NMR (151 MHz, DMSO-*d*<sub>6</sub>): δ 141.02 (d, *J* = 4.3 Hz), 128.5, 128.29 (for one diastereomer), 128.25 (for the other diastereomer), 125.8 (d, *J* = 2.9 Hz), 123.2 (qd, *J* = 276.7, 9.4 Hz), 75.11 (for one diastereomer, d, *J* = 2.9 Hz), 75.07 (for the other diastereomer, d, *J* = 2.9 Hz), 60.95 (for one diastereomer, qd, *J* = 36.9, 3.6 Hz), 60.92 (for the other diastereomer, qd, *J* = 36.1, 4.3 Hz), 24.0 (for one diastereomer, d, *J* = 4.3 Hz), 23.8 (for the other diastereomer, d, *J* = 4.3 Hz); <sup>19</sup>F NMR (565 MHz, DMSO-*d*<sub>6</sub>): δ -74.04; <sup>31</sup>P NMR (243 MHz, DMSO-*d*<sub>6</sub>): δ 8.66, 8.54; HRMS (APCI-) calcd for C<sub>10</sub>H<sub>11</sub>F<sub>3</sub>O<sub>3</sub>P ([M-H]<sup>-</sup>): 267.0398; found: 267.0315; IR (neat): 2913, 2826, 2255, 1401, 1280, 1134, 1023, 1005, 823, 761 cm<sup>-1</sup>.

#### Oct-1-en-3-yl (2,2,2-trifluoroethyl) phosphonate (**3i**)

<sup>1</sup>H NMR (600 MHz, DMSO-*d*<sub>6</sub>): δ 7.02 (1H for one diastereomer, d, *J*<sub>P-H</sub> = 724.5 Hz), 7.01 (1H for one diastereomer, d, *J*<sub>P-H</sub> = 726.5 Hz), 5.90-5.84 (1H, m), 5.31 (1H, d, *J* = 17.2 Hz), 5.22 (1H, d, *J* = 10.3 Hz), 4.87-4.83 (1H, m), 4.68-4.61 (m, 2H), 1.65-1.57 (2H, m), 1.29-1.25 (6H, m), 0.86-0.84 (3H, m); <sup>13</sup>C NMR (151 MHz, DMSO-*d*<sub>6</sub>): δ 136.72 (for one diastereomer, d, *J* = 2.9 Hz), 136.61 (for the other diastereomer, d, *J* = 2.9 Hz), 123.2 (qd, *J* = 277.4, 8.7 Hz), 117.34 (for one diastereomer), 117.31 (for the other diastereomer), 78.2 (for one diastereomer, d, *J* = 5.8 Hz), 78.1 (for the other diastereomer, d, *J* = 5.8 Hz), 61.00 (for one diastereomer, qd, *J* = 36.1, 4.3 Hz), 60.95 (for the other diastereomer, qd, *J* = 36.1, 5.8 Hz), 35.1 (for one diastereomer, d, *J* = 4.3 Hz), 35.0 (for the other diastereomer, d, *J* = 7.2 Hz), 30.8, 23.9 (for one diastereomer), 23.8 (for the other diastereomer), 21.9, 13.73 (for one diastereomer), 13.72 (for the other diastereomer); <sup>19</sup>F

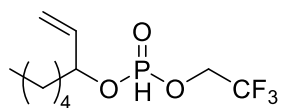

NMR (565 MHz, DMSO-*d*<sub>6</sub>): δ -74.07; <sup>31</sup>P NMR (243 MHz, DMSO-*d*<sub>6</sub>): δ 8.66, 8.61; HRMS (APCI-) calcd for C<sub>10</sub>H<sub>17</sub>F<sub>3</sub>O<sub>3</sub>P ([M-H]<sup>-</sup>): 273.0867; found: 273.0563; IR (neat): 2913, 2824, 2255, 1280, 1207, 1147, 1024, 1005, 823, 760, 616 cm<sup>-1</sup>.

#### 1-Ethynylcyclohexyl (2,2,2-trifluoroethyl) phosphonate (**3j**)

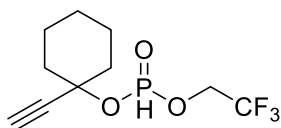

<sup>1</sup>H NMR (600 MHz, DMSO-*d*<sub>6</sub>): δ 7.18 (1H, d, *J*<sub>P-H</sub> = 725.82 Hz), 4.67-4.62 (2H, m), 3.97 (1H, s), 2.03-1.92 (2H, m), 1.92-1.80 (2H, m), 1.67-1.60 (2H, m), 1.51-1.38 (3H, m), 1.34-1.24 (1H, m); <sup>13</sup>C NMR (151 MHz, DMSO-*d*<sub>6</sub>): δ 123.2 (qd, *J* = 277.4, 10.1 Hz), 82.2 (d, *J* = 5.8 Hz), 79.7, 77.8 (d, *J* = 5.8 Hz), 61.1 (qd, *J* = 36.1, 4.3 Hz), 38.7 (d, *J* = 2.9 Hz), 38.6 (d, *J* = 4.3 Hz), 23.9, 22.13, 22.11; <sup>19</sup>F NMR (565 MHz, DMSO-*d*<sub>6</sub>): δ -73.89; <sup>31</sup>P NMR (243 MHz, DMSO-*d*<sub>6</sub>): δ 5.16; HRMS (APCI-) calcd for C<sub>10</sub>H<sub>13</sub>F<sub>3</sub>O<sub>3</sub>P ([M-H]<sup>-</sup>): 269.0554; found: 269.0531; IR (neat): 2943, 2829, 1448, 1414, 1023, 824, 763, 628 cm<sup>-1</sup>.

#### Benzyl (2,2,2-trifluoroethyl) phosphonate (**3k**)

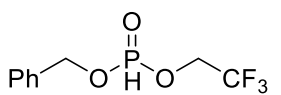

<sup>1</sup>H NMR (600 MHz, DMSO-*d*<sub>6</sub>): δ 7.43-7.36 (5H, m), 7.12 (1H, d, *J*<sub>P-H</sub> = 731.3 Hz), 5.13 (2H, dd, *J* = 9.3, 2.4 Hz), 4.68 (2H, qd, *J* = 8.6, 8.6 Hz); <sup>13</sup>C NMR (151 MHz, DMSO-*d*<sub>6</sub>): δ 135.7 (d, *J* = 5.8 Hz), 128.55, 128.54, 128.50, 123.2 (qd, *J* = 277.4, 8.7 Hz), 66.8 (d, *J* = 4.3 Hz), 61.1 (qd, *J* = 36.1, 4.3 Hz); <sup>19</sup>F NMR (565 MHz, DMSO-*d*<sub>6</sub>): δ -73.95; <sup>31</sup>P NMR (243 MHz, DMSO-*d*<sub>6</sub>): δ 10.18; HRMS (APCI-) calcd for C<sub>9</sub>H<sub>9</sub>F<sub>3</sub>O<sub>3</sub>P ([M-H]<sup>-</sup>): 253.0241; found: 253.0367; IR (neat): 2948, 2833, 1457, 1420, 1155, 1174, 1111, 1020, 656 cm<sup>-1</sup>.

#### Hexyl (2,2,2-trifluoroethyl) phosphonate (**3l**)

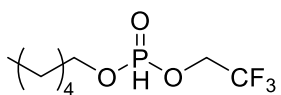

<sup>1</sup>H NMR (600 MHz, DMSO-*d*<sub>6</sub>): δ 6.98 (1H, d, *J*<sub>P-H</sub> = 725.1 Hz), 4.66 (2H, qd, *J* = 8.9, 8.9 Hz), 4.04 (2H, dt, *J* = 8.9, 6.5 Hz), 1.61 (2H, tt, *J* = 7.2, 7.2 Hz), 1.29-1.27 (6H, m), 0.85 (3H, t, *J* = 6.9 Hz); <sup>13</sup>C NMR (151 MHz, DMSO-*d*<sub>6</sub>): δ 123.3 (qd, *J* = 277.4, 8.7 Hz), 65.7 (d, *J* = 5.8 Hz), 61.0 (qd, *J* = 36.1, 2.9 Hz), 30.7, 29.6 (d, *J* = 7.2 Hz), 24.5, 22.0, 13.7; <sup>19</sup>F NMR (565 MHz, DMSO-*d*<sub>6</sub>): δ -74.10; <sup>31</sup>P NMR (243 MHz, DMSO-*d*<sub>6</sub>): δ 9.91; HRMS (APCI-) calcd for C<sub>8</sub>H<sub>15</sub>F<sub>3</sub>O<sub>3</sub>P ([M-H]<sup>-</sup>): 247.0711; found 247.0488; IR (neat): 2956, 2841, 2360, 2160, 1970, 1868, 1652, 1541, 1064, 1030, 1013, 665 cm<sup>-1</sup>.

#### 6-Chlorohexyl (2,2,2-trifluoroethyl) phosphonate (**3m**)

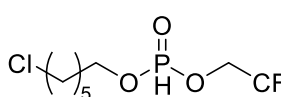

<sup>1</sup>H NMR (600 MHz, DMSO-*d*<sub>6</sub>): δ 6.99 (1H, d, *J*<sub>P-H</sub> = 725.1 Hz), 4.66 (2H, qd, *J* = 8.9, 8.9 Hz), 4.05 (2H, td, *J* = 8.3, 6.5 Hz), 3.61 (2H, t, *J* = 6.5 Hz), 1.75-1.57 (4H, m), 1.45-1.27 (4H, m); <sup>13</sup>C NMR (151 MHz, DMSO-*d*<sub>6</sub>): δ 125.1 (qd, *J* = 277.4, 8.7 Hz), 65.55 (d, *J* = 7.22 Hz), 61.0 (qd, *J* = 36.1, 4.3 Hz), 45.2, 31.9, 29.5 (d, *J* = 5.8 Hz), 25.7, 24.1; <sup>19</sup>F NMR



(565 MHz, DMSO-*d*<sub>6</sub>): δ -74.07; <sup>31</sup>P NMR (243 MHz, DMSO-*d*<sub>6</sub>): δ 9.94; HRMS (APCI-) calcd for C<sub>8</sub>H<sub>14</sub>ClF<sub>3</sub>O<sub>3</sub>P ([M-H]<sup>-</sup>): 281.0321; found 281.0148; IR (neat): 2941, 2829, 2356, 2161, 1654, 1023, 995, 825, 763 cm<sup>-1</sup>.

2,2,2-Trifluoroethyl (2-phenoxyethyl) phosphonate (**3n**)

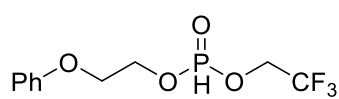

<sup>1</sup>H NMR (600 MHz, DMSO-*d*<sub>6</sub>): δ 7.29 (2H, t, *J* = 7.9 Hz), 7.10 (1H, d, *J*<sub>P-H</sub> = 740.9 Hz), 7.00-6.90 (3H, m), 4.69 (2H, qd, *J* = 8.9, 8.9 Hz), 4.45-4.32 (2H, m), 4.22-4.17 (2H, m); <sup>13</sup>C NMR (151 MHz, DMSO-*d*<sub>6</sub>): δ 158.0, 129.5, 123.3 (qd, *J* = 277.4, 8.7 Hz), 120.9, 114.5, 66.6 (d, *J* = 5.8 Hz), 64.5 (d, *J* = 5.8 Hz), 60.9 (qd, *J* = 36.1, 4.3 Hz); <sup>19</sup>F NMR (565 MHz, DMSO-*d*<sub>6</sub>): δ -73.98; <sup>31</sup>P NMR (243 MHz, DMSO-*d*<sub>6</sub>): δ 10.45; HRMS (APCI-) calcd for C<sub>10</sub>H<sub>11</sub>F<sub>3</sub>O<sub>4</sub>P ([M-H]<sup>-</sup>): 283.0347; found 283.2507; IR (neat): 2359, 2159, 1652, 1047, 1024, 993, 824, 761 cm<sup>-1</sup>.

2-Ethoxy-1-(2-ethoxyethoxy)ethyl (2,2,2-trifluoroethyl) phosphonate (**3o**)

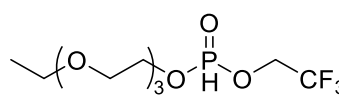

<sup>1</sup>H NMR (600 MHz, DMSO-*d*<sub>6</sub>): δ 7.03 (1H, d, *J*<sub>P-H</sub> = 733.4 Hz), 4.66 (2H, qd, *J* = 8.9, 8.9 Hz), 4.23-4.12 (2H, m), 3.62 (2H, t, *J* = 4.5 Hz), 3.58-3.48 (6H, m), 3.46-3.44 (2H, m), 3.41 (2H, q, *J* = 6.9 Hz), 1.09 (3H, t, *J* = 7.2 Hz); <sup>13</sup>C NMR (151 MHz, DMSO-*d*<sub>6</sub>): δ 123.3 (qd, *J* = 277.4, 8.7 Hz), 69.8, 69.70, 69.68, 69.3 (d, *J* = 5.8 Hz), 69.2, 65.5, 65.2 (d, *J* = 5.8 Hz), 60.7 (qd, *J* = 36.1, 4.3 Hz), 15.0; <sup>19</sup>F NMR (565 MHz, DMSO-*d*<sub>6</sub>): δ -74.04; <sup>31</sup>P NMR (243 MHz, DMSO-*d*<sub>6</sub>): δ 10.40; HRMS (APCI-) calcd for C<sub>10</sub>H<sub>19</sub>F<sub>3</sub>O<sub>6</sub>P ([M-H]<sup>-</sup>): 323.0871; found 323.0659; IR (neat): 2361, 2159, 1677, 1652, 1048, 1024, 993, 824, 761 cm<sup>-1</sup>.

3-Methylbut-3-en-1-yl (2,2,2-trifluoroethyl) phosphonate (**3p**)

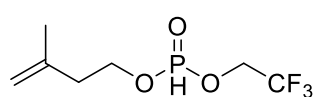

<sup>1</sup>H NMR (600 MHz, DMSO-*d*<sub>6</sub>): δ 7.00 (1H, d, *J*<sub>P-H</sub> = 727.2 Hz), 4.81 (1H, s), 4.76 (1H, s), 4.66 (2H, qd, *J* = 8.9, 8.9 Hz), 4.22-4.12 (2H, m), 2.35 (2H, t, *J* = 6.5 Hz), 1.71 (3H, s); <sup>13</sup>C NMR (151 MHz, DMSO-*d*<sub>6</sub>): δ 141.0, 123.3 (qd, *J* = 277.4, 8.7 Hz), 112.7, 63.7 (d, *J* = 5.8 Hz), 60.9 (qd, *J* = 36.9, 3.6 Hz), 33.7 (d, *J* = 5.8 Hz), 21.9; <sup>19</sup>F NMR (565 MHz, DMSO-*d*<sub>6</sub>): δ -74.01; <sup>31</sup>P NMR (243 MHz, DMSO-*d*<sub>6</sub>): δ 9.83; HRMS (APCI-) calcd for C<sub>7</sub>H<sub>11</sub>F<sub>3</sub>O<sub>3</sub>P ([M-H]<sup>-</sup>): 231.0398; found 231.0162; IR (neat): 2943, 2829, 2361, 2165, 1662, 1024, 1001, 824, 761 cm<sup>-1</sup>.

(*E*)-Hex-2-en-1-yl (2,2,2-trifluoroethyl) phosphonate (**3q**)

<sup>1</sup>H NMR (600 MHz, DMSO-*d*<sub>6</sub>): δ 7.01 (1H, d, *J*<sub>P-H</sub> = 726.5 Hz), 5.83 (1H, td, *J* = 7.2, 14.4 Hz), 5.63-5.54 (1H, m), 4.66 (2H, qd, *J* = 8.9, 8.9 Hz), 4.52 (2H, dd, *J* = 6.9, 9.6 Hz), 2.00 (2H, q, *J* = 6.9 Hz), 1.36 (2H, td, *J* = 7.3, 7.3 Hz), 0.86 (3H, t, *J* = 7.6 Hz); <sup>13</sup>C NMR (151 MHz, DMSO-*d*<sub>6</sub>): δ 136.2, 124.4 (d, *J* = 5.8 Hz), 123.3 (qd, *J* = 278.2, 9.4 Hz), 66.1 (d, *J* = 5.8 Hz), 60.9 (qd, *J* = 36.1, 4.3 Hz), 33.5, 21.4, 13.4; <sup>19</sup>F NMR (565 MHz, DMSO-

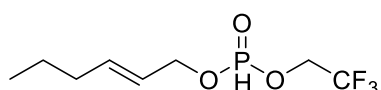

$d_6$ ):  $\delta$  -74.04;  $^{31}\text{P}$  NMR (243 MHz,  $\text{DMSO-}d_6$ ):  $\delta$  9.91; HRMS (APCI-) calcd for  $\text{C}_8\text{H}_{13}\text{F}_3\text{O}_3\text{P}$  ( $[\text{M-H}]^-$ ): 245.0554; found 245.0310; IR (neat): 2942, 2829, 2358, 2164, 1654, 1023, 824, 763  $\text{cm}^{-1}$ .

((3*aR*,4*R*,6*R*,6*aR*)-6-Methoxy-2,2-dimethyltetrahydrofuro[3,4-*d*][1,3]dioxol-4-yl)methyl (2,2,2-trifluoroethyl) phosphonate (**3r**)

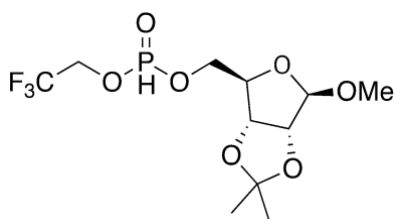

$^1\text{H}$  NMR (600 MHz,  $\text{DMSO-}d_6$ ):  $\delta$  7.07 (1H for one diastereomer, d,  $J_{\text{P-H}} = 736.1$  Hz), 7.06 (1H for one diastereomer, d,  $J_{\text{P-H}} = 737.5$  Hz), 4.95 (1H, s), 4.77-4.67 (3H, m), 4.57 (1H, d,  $J = 6.2$  Hz), 4.25 (1H, t,  $J = 6.9$  Hz), 4.08-3.96 (2H, m), 3.24 (3H, d,  $J = 5.2$  Hz), 1.38 (s, 3H), 1.25 (s, 3H);  $^{13}\text{C}$  NMR (151 MHz,  $\text{DMSO-}d_6$ ):  $\delta$  123.3 (qd,  $J = 277.4$ , 8.7 Hz), 111.71, 111.69, 108.81, 108.78, 84.4, 84.24, 84.19, 84.1, 80.7, 80.6, 61.03 (for one diastereomer, qd,  $J = 36.1$ , 4.3 Hz), 61.01 (for the other diastereomer, qd,  $J = 36.1$ , 4.3 Hz), 54.5, 54.4, 26.2, 24.6;  $^{19}\text{F}$  NMR (565 MHz,  $\text{DMSO-}d_6$ ):  $\delta$  -74.04;  $^{31}\text{P}$  NMR (243 MHz,  $\text{DMSO-}d_6$ ):  $\delta$  10.21; HRMS (APCI-) calcd for  $\text{C}_{11}\text{H}_{17}\text{F}_3\text{O}_7\text{P}$  ( $[\text{M-H}]^-$ ): 349.0664; found: 349.0300; IR (neat): 2915, 2825, 1665, 1280, 1207, 1144, 1050, 1024, 1004, 823, 761, 616  $\text{cm}^{-1}$ .

(2*R*,3*S*,5*S*)-2-((Bis(4-methoxyphenyl)(phenyl)methoxy)methyl)-5-methoxytetrahydrofuran-3-yl (2,2,2-trifluoroethyl) phosphonate (**3s**)

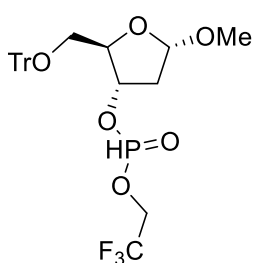

$^1\text{H}$  NMR (600 MHz,  $\text{CDCl}_3$ ):  $\delta$  7.40 (6H, d,  $J = 8.3$  Hz), 7.29 (6H, t,  $J = 7.6$  Hz), 7.22 (3H, t,  $J = 6.9$  Hz), 6.88 (1H for one diastereomer, d,  $J_{\text{P-H}} = 734.0$  Hz), 6.87 (1H for the other diastereomer, d,  $J_{\text{P-H}} = 732.7$  Hz), 5.18 (1H, d,  $J = 4.1$  Hz), 5.06-4.95 (1H, m), 4.45-4.20 (2H and 1H for one diastereomer, m), 4.13-4.01 (1H for the other diastereomer, m), 3.41 (3H for one diastereomer, s), 3.40 (3H for the other diastereomer, s), 3.31 (1H for one diastereomer, dd,  $J = 10.3$ , 4.1 Hz), 3.30 (1H for the other diastereomer, dd,  $J = 10.3$ , 4.8 Hz), 3.19 (1H for one diastereomer, dd,  $J = 10.3$ , 3.4 Hz), 3.15 (1H for the other diastereomer, dd,  $J = 10.3$ , 3.4 Hz), 2.49-2.38 (1H, m), 2.23 (1H for one diastereomer, d,  $J = 14.4$  Hz), 2.20 (1H for the other diastereomer, d,  $J = 14.4$  Hz);  $^{13}\text{C}$  NMR (151 MHz,  $\text{CDCl}_3$ ):  $\delta$  143.6 (for one diastereomer), 143.5 (for the other diastereomer), 128.6 (for both diastereomers), 127.9 (for both diastereomers), 127.1 (for both diastereomers), 122.5 (qd,  $J = 277.4$ , 7.2 Hz), 105.1 (for one diastereomer), 105.0 (for the other diastereomer), 86.9 (for one diastereomer), 86.8 (for the other diastereomer), 83.43 (for one diastereomer, d,  $J = 5.8$  Hz), 83.42 (for the other diastereomer, d,  $J = 7.2$  Hz), 76.7 (d,  $J = 7.2$  Hz), 63.3 (for one diastereomer), 63.1 (for the other diastereomer), 61.71 (for one diastereomer, qd,  $J = 37.6$ , 2.9 Hz), 61.68 (for the other diastereomer, qd,  $J = 37.6$ , 5.8 Hz), 55.2 (for one diastereomer), 55.1 (for the other diastereomer), 40.5 (for one

diastereomer, d,  $J = 4.3$  Hz), 40.3 (for the other diastereomer, d,  $J = 4.3$  Hz);  $^{19}\text{F}$  NMR (565 MHz,  $\text{CDCl}_3$ ):  $\delta$  -75.09;  $^{31}\text{P}$  NMR (243 MHz,  $\text{CDCl}_3$ ):  $\delta$  7.72, 7.34; HRMS (APCI-) calcd for  $\text{C}_{27}\text{H}_{27}\text{F}_3\text{O}_6\text{P}$  ( $[\text{M}-\text{H}]^-$ ): 535.1497; found: 535.1733; IR (neat): 2903, 2255, 1655, 1491, 1450, 1280, 1295, 1134, 1050, 1024, 1005, 824,  $761\text{ cm}^{-1}$ .

(2*R*,3*S*,5*R*)-2-((Bis(4-methoxyphenyl)(phenyl)methoxy)methyl)-5-methoxytetrahydrofuran-3-yl (2,2,2-trifluoroethyl) phosphonate (**3t**)

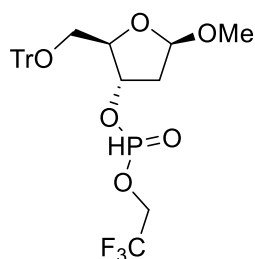

$^1\text{H}$  NMR (600 MHz,  $\text{DMSO}-d_6$ ):  $\delta$  7.44-7.17 (15H, m), 7.04 (d, 1H,  $J_{\text{P-H}} = 735.5$  Hz), 5.14-5.10 (1H, m), 5.05-5.02 (1H, m), 4.70-4.48 (2H, m), 4.26-4.14 (1H, m), 3.21 (3H, s), 3.19-3.11 (1H, m), 3.11-3.00 (1H, m), 2.34-2.24 (1H, m), 2.24-2.12 (1H, m);  $^{13}\text{C}$  NMR (151 MHz,  $\text{DMSO}-d_6$ ):  $\delta$  143.6, 128.3, 127.9, 127.1, 123.2 (qd,  $J = 260.0$ , 5.8 Hz), 104.7, 86.2, 82.8, 76.64 (for one diastereomer, d,  $J = 5.8$  Hz), 76.57 (for the other diastereomer, d,  $J = 5.8$  Hz), 63.65, 63.60, 61.42, 61.36, 61.32, 61.30, 61.23, 61.21, 61.17, 61.1, 61.0, 60.91, 60.88, 60.85, 60.7, 60.6, 54.8;  $^{19}\text{F}$  NMR (565 MHz,  $\text{DMSO}-d_6$ ):  $\delta$  -73.98;  $^{31}\text{P}$  NMR (243 MHz,  $\text{DMSO}-d_6$ ):  $\delta$  9.37; HRMS (APCI-) calcd for  $\text{C}_{26}\text{H}_{26}\text{F}_3\text{O}_5\text{P}$  ( $[\text{M}-\text{CH}_3]^-$ ): 506.1470; found: 506.5250; IR (neat): 2900, 2255, 2116, 1659, 1280, 1207, 1135, 1050, 1024, 1005, 823, 761,  $626\text{ cm}^{-1}$ .

((2*R*,3*S*,5*S*)-3-(Benzyloxy)-5-methoxytetrahydrofuran-2-yl)methyl (2,2,2-trifluoroethyl) phosphonate (**3u**)

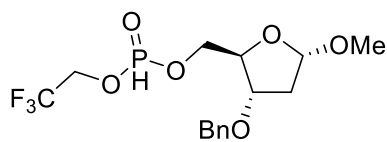

$^1\text{H}$  NMR (600 MHz,  $\text{DMSO}-d_6$ ):  $\delta$  7.35-7.26 (5H, m), 7.04 (1H for one diastereomer, d,  $J_{\text{P-H}} = 734.8$  Hz), 7.03 (1H for one diastereomer, d,  $J_{\text{P-H}} = 736.1$  Hz), 5.04-5.02 (1H, m), 4.70-4.64 (2H, m), 4.50-4.44 (2H, m), 4.24-4.17 (1H, m), 4.15-4.08 (2H, m), 4.00-3.96 (1H, m), 3.25 (3H, s), 2.29-2.20 (1H, m), 1.89 (d, 1H,  $J = 14.4$  Hz);  $^{13}\text{C}$  NMR (151 MHz,  $\text{DMSO}-d_6$ ):  $\delta$  138.2, 128.2, 127.6, 127.5, 124.2, 124.1, 122.4, 122.3, 104.7, 81.0, 80.9, 78.0, 70.8, 65.72, 65.68, 61.3, 61.02, 61.00, 60.98, 60.95, 60.78, 60.76, 60.74, 60.71, 54.4, 38.1;  $^{19}\text{F}$  NMR (565 MHz,  $\text{DMSO}-d_6$ ):  $\delta$  -73.98;  $^{31}\text{P}$  NMR (243 MHz,  $\text{DMSO}-d_6$ ):  $\delta$  10.72, 10.53; HRMS (APCI-) calcd for  $\text{C}_{15}\text{H}_{19}\text{F}_3\text{O}_6\text{P}$  ( $[\text{M}-\text{H}]^-$ ): 383.0871; found: 383.0530; IR (neat): 2909, 2825, 2255, 1637, 1280, 1207, 1134, 1050, 1023, 1004, 823, 760,  $616\text{ cm}^{-1}$ .

((2*R*,3*S*,5*R*)-3-(Benzyloxy)-5-methoxytetrahydrofuran-2-yl)methyl (2,2,2-trifluoroethyl) phosphonate (**3v**)

$^1\text{H}$  NMR (600 MHz,  $\text{DMSO}-d_6$ ):  $\delta$  7.35-7.27 (5H, m), 7.08 (1H for one diastereomer, d,  $J_{\text{P-H}} = 734.1$  Hz), 7.06 (1H for one diastereomer, d,  $J_{\text{P-H}} = 734.8$  Hz), 5.09-5.07 (1H, m), 4.72-4.66 (2H, m), 4.47 (2H, s), 4.18-3.99 (4H, m), 3.24 (3H for one diastereomer, s), 3.23 (3H for the other diastereomer, s), 2.20-2.15 (1H, m), 2.10-2.03 (1H, m);  $^{13}\text{C}$  NMR (151 MHz,  $\text{DMSO}-d_6$ ):  $\delta$  138.0, 128.2, 127.6, 127.5, 124.21, 124.15, 122.3, 122.2, 105.3, 81.83, 81.79, 81.77, 81.7, 78.63, 78.60, 70.7, 70.6, 66.7, 66.6, 66.41, 66.37, 61.33, 61.3,

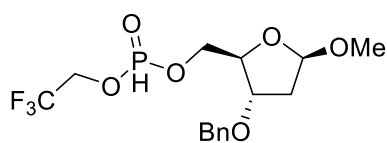

61.08, 61.05, 60.84, 60.81, 60.59, 60.56, 54.5, 38.71, 38.68;  $^{19}\text{F}$  NMR (565 MHz, DMSO- $d_6$ ):  $\delta$ : -74.01;  $^{31}\text{P}$  NMR (243 MHz, DMSO- $d_6$ ):  $\delta$  10.29, 10.12; HRMS (APCI-) calcd for  $\text{C}_{15}\text{H}_{19}\text{F}_3\text{O}_6\text{P}$  ( $[\text{M}-\text{H}]^-$ ): 383.0871; found: 383.0918; IR (neat): 2920, 2826, 2255, 1654, 1280, 1207, 1134, 1050, 1024, 1004, 823, 761, 626  $\text{cm}^{-1}$ .

2,2,2-Trifluoroethyl (((2*R*,3*R*,4*S*,5*R*,6*S*)-3,4,5-tris(benzyloxy)-6-methoxytetrahydro-2H-pyran-2-yl)methyl) phosphonate (**3w**)

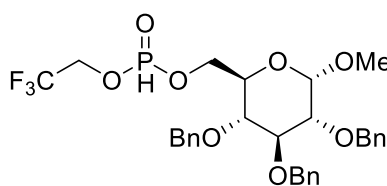

$^1\text{H}$  NMR (600 MHz, DMSO- $d_6$ ):  $\delta$  7.36-7.27 (15H, m), 7.06 (1H for one diastereomer, d, 1H,  $J_{\text{P-H}} = 737.5$  Hz), 7.05 (1H for one diastereomer, d, 1H,  $J_{\text{P-H}} = 737.5$  Hz), 4.88-4.86 (2H, m), 4.80-4.59 (8H, m), 4.32-4.19 (2H, m), 3.81 (1H, t,  $J = 9.28$  Hz), 3.53-3.44 (2H, m), 3.32 (s, 3H);  $^{13}\text{C}$  NMR (151 MHz, DMSO- $d_6$ ):  $\delta$  138.6, 138.42, 138.38, 138.1, 128.2, 128.1, 127.72, 127.66, 127.62, 127.59, 127.57, 127.55, 127.51, 127.4, 124.2, 124.1, 122.33, 122.27, 97.0, 80.9, 79.5, 79.4, 76.73, 76.67, 74.5, 74.0, 71.5, 68.9, 61.3, 61.2, 61.02, 61.00, 60.78, 60.76, 60.6, 60.5, 54.70, 54.67;  $^{19}\text{F}$  NMR (565 MHz, DMSO- $d_6$ ):  $\delta$ : -73.95;  $^{31}\text{P}$  NMR (243 MHz, DMSO- $d_6$ ):  $\delta$  10.69, 10.58; HRMS (APCI-) calcd for  $\text{C}_{30}\text{H}_{33}\text{F}_3\text{O}_8\text{P}$  ( $[\text{M}-\text{H}]^-$ ): 609.1865; found: 609.1949; IR (neat): 2943, 2832, 1450, 1418, 1112, 1023, 620  $\text{cm}^{-1}$ .

Methyl N-((benzyloxy)carbonyl)-O-((2,2,2-trifluoroethyl) phosphonate)-L-serinate (**3x**)

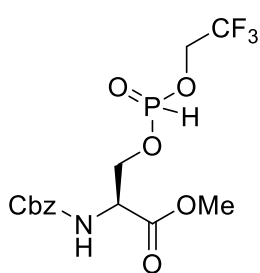

$^1\text{H}$  NMR (600 MHz, DMSO- $d_6$ ):  $\delta$  8.00 (1H, d,  $J = 8.3$  Hz), 7.33-7.30 (m, 5H), 7.04 (1H for one diastereomer, d,  $J_{\text{P-H}} = 740.9$  Hz), 7.02 (1H for one diastereomer, d,  $J_{\text{P-H}} = 738.9$  Hz), 5.07 (2H, s), 4.71-4.62 (2H, m), 4.55-4.50 (1H, m), 4.37-4.22 (2H, m), 3.67 (3H, s);  $^{13}\text{C}$  NMR (151 MHz, DMSO- $d_6$ ):  $\delta$  169.7, 169.6, 156.1, 136.8, 128.4, 128.0, 127.9, 127.8, 124.2, 124.1, 122.4, 122.3, 120.54, 120.46, 65.9, 64.70, 64.67, 64.6, 61.1, 60.9, 54.10, 54.05, 54.0, 52.35, 52.33;  $^{19}\text{F}$  NMR (565 MHz, DMSO- $d_6$ ):  $\delta$  -74.07;  $^{31}\text{P}$  NMR (243 MHz, DMSO- $d_6$ ):  $\delta$  10.31, 10.26; HRMS (APCI-) calcd for  $\text{C}_{14}\text{H}_{16}\text{F}_3\text{NO}_7\text{P}$  ( $[\text{M}-\text{H}]^-$ ): 398.0616; found: 398.0363; IR (neat): 2937, 2831, 1717, 1541, 1457, 1345, 1278, 1214, 1130, 1025, 883, 698  $\text{cm}^{-1}$ .

(3*S*,8*S*,9*S*,10*R*,13*R*,14*S*,17*R*)-10,13-Dimethyl-17-((*R*)-6-methylheptan-2-yl)-2,3,4,7,8,9,10,11,12,13,14,15,16,17-tetradecahydro-1H-cyclopenta[*a*]phenanthren-3-yl (2,2,2-trifluoroethyl) phosphonate (**3y**)

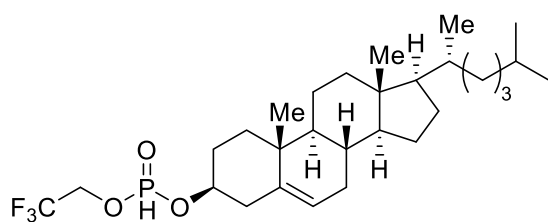

$^1\text{H}$  NMR (600 MHz,  $\text{CDCl}_3$ ):  $\delta$  6.87 (1H, d,  $J_{\text{P-H}} = 721.7$  Hz), 5.32 (1H, br), 4.34-4.25 (3H, m), 2.44-2.32 (2H, m), 1.95-1.90 (3H, m), 1.82-1.66 (3H, m), 1.53-1.13 (10H, m), 1.10-0.87 (12H, m), 0.84 (4H, d,  $J = 6.9$  Hz), 0.795 (d, 3H,  $J = 6.9$  Hz), 0.792 (d, 3H,  $J = 6.9$  Hz), 0.60 (s, 3H);  $^{13}\text{C}$  NMR (151 MHz,  $\text{CDCl}_3$ ):  $\delta$  138.79, 138.77, 123.5, 123.1, 121.73, 121.69, 78.02, 77.98, 62.02, 62.00, 61.8, 61.7, 61.53, 61.50, 61.48, 61.3, 61.25, 61.23, 56.6, 56.1, 49.9, 42.3, 40.12, 40.09, 40.03, 40.00, 39.6, 39.5, 36.8, 36.3, 36.1, 35.7, 31.8, 31.7, 29.9, 29.83, 29.79, 29.76, 28.2, 28.0, 27.3, 24.2, 23.8, 22.8, 22.5, 21.0, 19.2, 18.7, 14.1, 11.8;  $^{19}\text{F}$  NMR (565 MHz,  $\text{CDCl}_3$ ):  $\delta$  -75.13 (s);  $^{31}\text{P}$  NMR (243 MHz,  $\text{CDCl}_3$ ):  $\delta$ : 6.78; HRMS (APCI-) calcd for  $\text{C}_{29}\text{H}_{47}\text{F}_3\text{O}_3\text{P}$  ( $[\text{M-H}]^-$ ): 531.3215; found: 531.3165; IR (neat): 3033, 2493, 2355, 1384, 1341, 1278, 1205, 1134, 1068, 884,  $677\text{cm}^{-1}$ .

(8*R*,9*S*,13*S*,14*S*,17*S*)-3-Hydroxy-13-methyl-7,8,9,11,12,13,14,15,16,17-decahydro-6H-cyclopenta[*a*]phenanthren-17-yl (2,2,2-trifluoroethyl) phosphonate (**3z**)

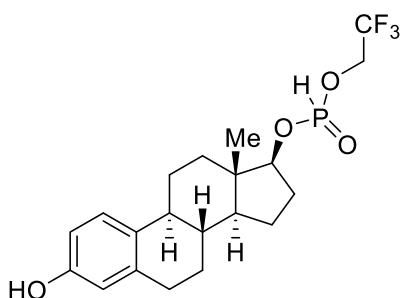

$^1\text{H}$  NMR (600 MHz,  $\text{DMSO-}d_6$ ):  $\delta$  7.01 (d, 1H,  $J = 8.9$  Hz), 6.82 (d, 1H,  $J = 677.7$  Hz), 6.49 (dd, 1H,  $J = 8.6$ , 2.4 Hz), 6.42 (d, 1H,  $J = 2.1$  Hz), 4.52-4.46 (m, 1H), 4.03-3.99 (m, 1H), 3.50 (t, 1H,  $J = 8.3$  Hz), 2.70-2.65 (m, 2H), 2.20 (dd, 1H,  $J = 13.4$ , 3.1 Hz), 2.03 (dd, 1H,  $J = 15.1$ , 6.9 Hz), 1.88-1.85 (m, 1H), 1.74 (dt, 1H,  $J = 12.1$ , 2.9 Hz), 1.55 (t, 1H,  $J = 4.1$  Hz), 1.37 (q, 1H,  $J = 4.1$  Hz), 1.30-1.15 (m, 7H), 0.65 (s, 3H);  $^{13}\text{C}$  NMR (151 MHz,  $\text{DMSO-}d_6$ ):  $\delta$  155.0, 137.2, 130.5, 126.1, 125.4, 125.3, 124.65, 124.59, 115.0, 112.8, 80.2, 61.02, 61.00, 60.78, 60.77, 60.55, 60.53, 60.32, 60.29, 59.8, 49.6, 43.6, 42.9, 38.8, 36.7, 30.0, 29.3, 27.1, 26.2, 22.9, 20.8, 14.1, 11.3;  $^{19}\text{F}$  NMR (565 MHz,  $\text{DMSO-}d_6$ ):  $\delta$  -73.98;  $^{31}\text{P}$  NMR (243 MHz,  $\text{DMSO-}d_6$ ):  $\delta$ : 4.73; HRMS (APCI-) calcd for  $\text{C}_{20}\text{H}_{25}\text{F}_3\text{O}_4\text{P}$  ( $[\text{M-H}]^-$ ): 417.1443; found: 417.1604; IR (neat): 2923, 2833, 1501, 1448, 1401, 1207, 1132, 1023, 871,  $617\text{cm}^{-1}$ .

Tert-butyl (tert-butoxycarbonyl)(1-((3*aR*,4*R*,6*R*,6*aR*)-6-(((2,2,2-trifluoroethyl) phosphonate) methyl)-2,2-dimethyltetrahydrofuro[3,4-*d*][1,3]dioxol-4-yl)-2-oxo-1,2-dihydropyrimidin-4-yl)carbamate methyl phosphonate (**3aa**)

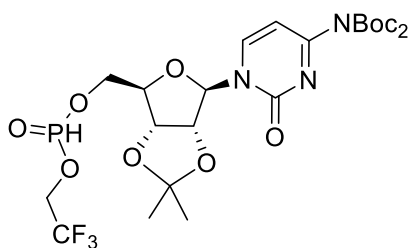

$^1\text{H}$  NMR (600 MHz,  $\text{CDCl}_3$ ):  $\delta$  7.56 (dd, 1H,  $J = 7.22$ , 2.41 Hz), 7.04 (q, 1H,  $J = 3.67$  Hz), 6.86 (dd, 1H,  $J = 736.16$ , 13.60 Hz), 5.50 (d, 1H,  $J = 13.75$  Hz), 5.10-5.07 (m, 1H), 4.89-4.87 (m, 1H), 4.38-4.29 (m, 5H), 1.48 (d, 21H,  $J = 9.62$  Hz), 1.25 (s, 3H);  $^{13}\text{C}$  NMR (151 MHz,  $\text{CDCl}_3$ ):  $\delta$  163.04, 162.99, 153.9, 153.8, 149.2, 149.1, 146.9, 146.7, 125.22, 125.17, 123.4, 123.3,

121.54, 121.49, 119.7, 114.1, 114.0, 98.2, 98.1, 96.3, 87.45, 87.40, 87.37, 87.3, 85.13, 85.11, 84.6, 84.5, 81.5, 81.3, 65.9, 65.82, 65.78, 62.03, 61.99, 61.8, 61.7, 61.53, 61.49, 61.3, 61.2, 27.5, 26.82, 26.79, 24.93, 24.91; <sup>19</sup>F NMR (565 MHz, CDCl<sub>3</sub>): δ -75.16; <sup>31</sup>P NMR (243 MHz, CDCl<sub>3</sub>): δ 8.88; HRMS (APCI-) calcd for C<sub>24</sub>H<sub>34</sub>F<sub>3</sub>N<sub>3</sub>O<sub>11</sub>P ([M-H]<sup>-</sup>): 628.1883; found: 628.1440; IR (neat): 2982, 2361, 2164, 1777, 1744, 1678, 1457, 1321, 1264, 1157, 1058, 1015, 787 cm<sup>-1</sup>.

Tert-butyl (tert-butoxycarbonyl)(9-((3*aR*,4*R*,6*R*,6*aR*)-6-(((2,2,2-trifluoroethyl) phosphonate) methyl)-2,2-dimethyltetrahydrofuro[3,4-*d*][1,3]dioxol-4-yl)-9H-purin-6-yl)carbamate (**3ab**)

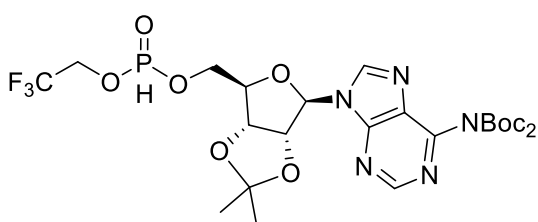

<sup>1</sup>H NMR (600 MHz, CDCl<sub>3</sub>) δ: 8.80 (d, 1H, *J* = 3.44 Hz), 8.17 (s, 1H), 6.76 (dd, 1H, *J* = 750.22, 5.84 Hz), 5.38 (dd, 1H, *J* = 6.53, 1.72 Hz), 5.07 (q, 1H, *J* = 3.44 Hz), 4.42-4.22 (m, 6H), 1.56 (s, 3H), 1.39 (s, 18H), 1.33 (s, 3H). <sup>31</sup>P NMR (243 MHz, CDCl<sub>3</sub>):

δ 8.99, 8.82. Phosphonylated nucleosides (**8ab**) was too unstable, and therefore not able to take <sup>13</sup>C NMR, IR, and HRMS.

Tert-butyl 2-(bis(tert-butoxycarbonyl)amino)-9-((3*aR*,4*R*,6*R*,6*aR*)-6-(((2,2,2-trifluoroethyl) phosphonate) methyl)-2,2-dimethyltetrahydrofuro[3,4-*d*][1,3]dioxol-4-yl)-6-oxo-6,9-dihydro-1H-purine-1-carboxylate (**3ac**)

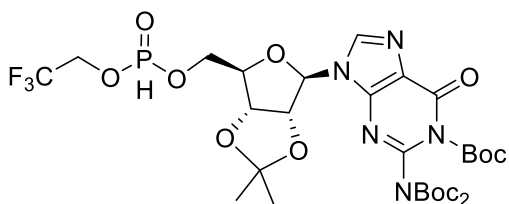

<sup>1</sup>H NMR (600 MHz, CDCl<sub>3</sub>): δ 7.97 (d, 1H, *J* = 2.75 Hz), 6.79 (dd, 1H, *J* = 737.85, 17.53 Hz), 6.05 (dd, 1H, *J* = 10.31, 1.37 Hz), 5.35-5.32 (m, 1H), 5.05 (td, 1H, *J* = 6.19, 3.44 Hz), 4.38-4.18 (m, 5H), 1.64-1.57 (m, 11H), 1.51 (s, 3H), 1.42 (s, 16H), 1.29 (s, 3H); <sup>13</sup>C NMR (151

MHz, CDCl<sub>3</sub>): δ 161.0, 160.9, 151.3, 151.01, 150.98, 150.7, 150.6, 141.7, 121.0, 120.9, 114.6, 114.5, 113.9, 93.3, 90.34, 90.29, 86.8, 86.6, 86.4, 86.12, 86.09, 85.91, 85.88, 84.9, 84.4, 84.3, 84.2, 84.1, 83.7, 83.4, 83.24, 83.22, 81.5, 81.2, 81.0, 65.5, 62.8, 61.8, 61.72, 61.69, 61.65, 61.51, 61.5, 61.47, 61.44, 61.4, 30.29, 30.27, 28.2, 28.1, 27.80, 27.79, 27.75, 27.67, 27.61, 27.58, 27.5, 27.4, 27.1, 26.9, 25.3, 25.11, 25.09, 25.06, 25.0; <sup>19</sup>F NMR (565 MHz, CDCl<sub>3</sub>): δ -75.19; <sup>31</sup>P NMR (243 MHz, CDCl<sub>3</sub>): δ 8.99, 8.88; HRMS (APCI-) calcd for C<sub>30</sub>H<sub>42</sub>F<sub>3</sub>N<sub>5</sub>O<sub>13</sub>P ([M-H]<sup>-</sup>): 768.2469; found: 768.2492; IR (neat): 2945, 2833, 2362, 2162, 1652, 1454, 1420, 1112, 1020, 733 cm<sup>-1</sup>.

Benzyl cyclohexyl phosphite (**4a**)

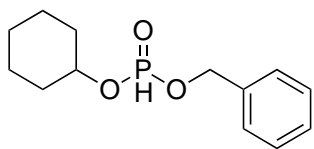

Colorless oil, 67.0 mg (90%)

$^1\text{H}$  NMR (600 MHz,  $\text{CDCl}_3$ ):  $\delta$  7.33- 7.20 (5H, m), 6.80 (1H, d,  $J_{\text{P-H}} = 697.6$  Hz), 5.00 (2H, d,  $J = 9.60$  Hz), 4.38-4.30 (1H, m), 1.95-1.85 (2H, m), 1.65-1.59 (2H, m), 1.49-1.38 (3H, m), 1.25-1.10 (3H, m);  $^{13}\text{C}$  NMR (150 MHz,  $\text{CDCl}_3$ ):  $\delta$  135.7 (d,  $J = 7.2$  Hz), 128.6, 128.4, 127.8, 76.0 (d,  $J = 5.8$  Hz), 66.9 (d,  $J = 5.8$  Hz), 33.5 (d,  $J = 4.3$  Hz), 33.4 (d,  $J = 4.3$  Hz), 24.9, 23.4;  $^{31}\text{P}$  NMR (240 MHz,  $\text{CDCl}_3$ ):  $\delta$  6.74; HRMS (DART):  $m/z$  calcd. for  $\text{C}_{26}\text{H}_{39}\text{O}_6\text{P}_2$  ( $[\text{2M}+\text{H}]^+$ ): 509.22219; found: 509.22349; IR (neat): 2936, 2859, 2425, 1498, 1455, 1255, 969  $\text{cm}^{-1}$ .

#### Cyclohexyl phenethyl phosphite (**4b**)

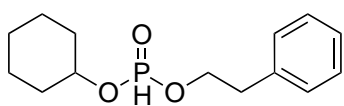

Colorless oil, 56.9 mg (70%)

$^1\text{H}$  NMR (600 MHz,  $\text{CDCl}_3$ ):  $\delta$  7.25-7.03 (5H, m), 6.69 (1H, d,  $J_{\text{P-H}} = 690.0$  Hz), 4.32-4.29 (1H, m), 4.23-4.12 (2H, m), 2.93 (2H, t,  $J = 6.9$  Hz), 1.85-1.70 (2H, m), 1.70-1.55 (2H, m), 1.47-1.42 (3H, m), 1.26-1.13 (3H, m);  $^{13}\text{C}$  NMR (150 MHz,  $\text{CDCl}_3$ ):  $\delta$  137.0, 128.9, 128.5, 126.7, 75.9 (d,  $J = 5.8$  Hz), 65.8 (d,  $J = 7.2$  Hz), 36.9, 36.8, 33.6 (d,  $J = 4.3$  Hz), 33.4 (d,  $J = 4.3$  Hz), 24.9, 23.4;  $^{31}\text{P}$  NMR (243 MHz,  $\text{CDCl}_3$ ):  $\delta$  6.71; HRMS (APCI-) calcd. for  $\text{C}_{14}\text{H}_{20}\text{O}_3\text{P}$  ( $[\text{M}-\text{H}]^-$ ): 267.1150; found: 267.1092; IR (neat): 2935, 2829, 2366, 1654, 1404, 1345, 1278, 1207, 1132, 1050, 1024, 824, 761, 607  $\text{cm}^{-1}$ .

#### Cyclohexyl (3-phenylpropyl) phosphite (**4c**)

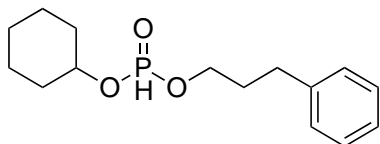

Pale yellow oil, 70.9 mg (85%)

$^1\text{H}$  NMR (495 MHz,  $\text{CDCl}_3$ ):  $\delta$  7.29 (2H, t,  $J = 7.4$  Hz), 7.22-7.13 (3H, m), 6.85 (1H, d,  $J_{\text{P-H}} = 691.5$  Hz), 4.52-4.42 (1H, m), 4.12-4.02 (2H, m), 2.73 (2H, t,  $J = 7.6$  Hz), 2.01 (2H, quin.,  $J = 7.1$  Hz), 1.98-1.90 (2H, m), 1.80-1.72 (2H, m), 1.62-1.48 (3H, m), 1.40-1.21 (3H, m);  $^{13}\text{C}$  NMR (125 MHz,  $\text{CDCl}_3$ ):  $\delta$  140.8, 128.40, 128.36, 126.0, 75.9 (d,  $J = 6.0$  Hz), 64.5 (d,  $J = 6.0$  Hz), 33.7 (d,  $J = 3.6$  Hz), 33.4 (d,  $J = 4.8$  Hz), 31.9 (d,  $J = 7.2$  Hz), 31.6, 25.0, 23.4;  $^{31}\text{P}$  NMR (200 MHz,  $\text{CDCl}_3$ ):  $\delta$  6.85 (s); HRMS (DART):  $m/z$  calcd. for  $\text{C}_{30}\text{H}_{47}\text{O}_6\text{P}_2$  ( $[\text{2M}+\text{H}]^+$ ): 565.28479; found: 565.28511; IR (neat): 2935, 2859, 1454, 1254, 1077, 741, 701  $\text{cm}^{-1}$ .

#### Cinnamyl cyclohexyl phosphite (**4d**)

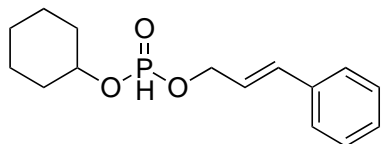

Pale yellow oil, 70.4 mg (82%)

$^1\text{H}$  NMR (600 MHz,  $\text{CDCl}_3$ ):  $\delta$  7.31 (2H, d,  $J = 7.4$  Hz), 6.98 (2H, dd,  $J = 6.8, 7.9$  Hz), 7.22-7.14 (1H, m), 6.96 (1H, d,  $J_{\text{P-H}} = 695.5$  Hz), 6.62 (2H, d,  $J = 15.8$  Hz), 6.24 (2H, dt,  $J = 15.8, 6.2$  Hz), 4.65 (2H, ddd,  $J = 9.6, 6.2, 1.1$  Hz), 4.46-4.36 (1H, m), 1.93-1.80 (2H, m), 1.72-1.62 (2H, m), 1.55-1.38 (3H, m), 1.30-1.11 (3H, m);  $^{13}\text{C}$  NMR (150 MHz,  $\text{CDCl}_3$ ):  $\delta$  135.8, 134.1, 128.5, 128.1, 126.6, 127.6 (d,  $J = 5.7$  Hz), 76.0 (d,  $J = 5.7$

Hz), 65.8 (d,  $J = 5.7$  Hz), 33.6 (d,  $J = 4.3$  Hz), 33.4 (d,  $J = 4.3$  Hz), 24.9, 23.4;  $^{31}\text{P}$  NMR (243 MHz,  $\text{CDCl}_3$ ):  $\delta$  6.82; HRMS (DART):  $m/z$  calcd. for  $\text{C}_{30}\text{H}_{43}\text{O}_6\text{P}_2$  ( $[\text{2M}+\text{H}]^+$ ): 561.25349; found: 561.25415; IR (neat): 2935, 2858, 1450, 1260, 741, 693  $\text{cm}^{-1}$ .

#### Cyclohexyl (2-phenoxyethyl) phosphite (**4e**)

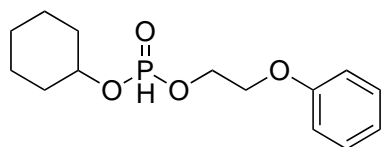

Colorless oil, 74.7 mg (88%)

$^1\text{H}$  NMR (600 MHz,  $\text{CDCl}_3$ ):  $\delta$  7.29 (2H, dd,  $J = 8.2, 7.6$  Hz), 6.98 (1H, dd,  $J = 8.3, 7.6$  Hz), 6.95 (1H, d,  $J_{\text{P-H}} = 701.7$  Hz), 6.91 (2H, d,  $J = 8.9$  Hz), 4.53-4.33 (3H, m), 4.18 (2H, dd,  $J = 4.8, 4.1$  Hz), 1.98-1.88 (2H, m), 1.78-1.68 (2H, m), 1.60-1.47 (3H, m), 1.37-1.20 (3H, m);  $^{13}\text{C}$  NMR (150 MHz,  $\text{CDCl}_3$ ):  $\delta$  158.1, 129.4, 121.2, 114.5, 76.0 (d,  $J = 7.2$  Hz), 66.8 (d,  $J = 5.7$  Hz), 63.8 (d,  $J = 5.7$  Hz), 33.5 (d,  $J = 4.3$  Hz), 33.4 (d,  $J = 4.3$  Hz), 24.9, 23.4;  $^{31}\text{P}$  NMR (243 MHz,  $\text{CDCl}_3$ ):  $\delta$  7.47; HRMS (DART):  $m/z$  calcd. for  $\text{C}_{28}\text{H}_{43}\text{O}_8\text{P}_2$  ( $[\text{2M}+\text{H}]^+$ ): 569.24331; found: 561.24802; IR (neat): 2935, 2859, 1598, 1497, 1457, 1245, 971, 755, 693  $\text{cm}^{-1}$ .

#### 6-Chlorohexyl cyclohexyl phosphite (**4f**)

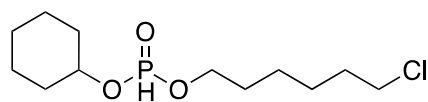

Pale yellow oil, 51.6 mg (61%)

$^1\text{H}$  NMR (600 MHz,  $\text{CDCl}_3$ ):  $\delta$  6.85 (1H, d,  $J_{\text{P-H}} = 690.8$  Hz), 4.50-4.38 (1H, m), 4.11-4.01 (2H, m), 3.54 (2H, t,  $J = 6.5$  Hz), 1.99-1.88 (2H, m), 1.82-1.65 (6H, m), 1.65-1.15 (10H, m).  $^{13}\text{C}$  NMR (150 MHz,  $\text{CDCl}_3$ ):  $\delta$  75.9 (d,  $J = 5.8$  Hz), 65.2 (d,  $J = 5.8$  Hz), 44.8, 33.7 (d,  $J = 4.3$  Hz), 33.4 (d,  $J = 4.3$  Hz), 32.3, 30.1 (d,  $J = 7.2$  Hz), 26.3, 25.0, 24.8, 23.4.  $^{31}\text{P}$  NMR (243 MHz,  $\text{CDCl}_3$ )  $\delta$  6.82; HRMS (DART) calcd. for  $\text{C}_{12}\text{H}_{25}\text{ClO}_3\text{P}$  ( $[\text{M}+\text{H}]^+$ ): 283.12298; found: 283.12293; IR (neat): 2938, 2860, 1450, 1254, 970  $\text{cm}^{-1}$ .

#### Cyclohexyl (((3*aR*,4*R*,6*R*,6*aR*)-6-methoxy-2,2-dimethyltetrahydrofuro[3,4-*d*][1,3]dioxol-4-yl)methyl) phosphite (**4g**)

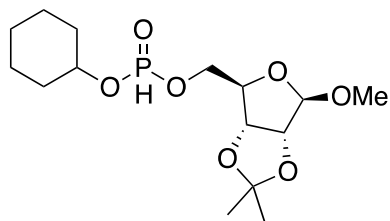

Colorless oil, 72.3 mg (69%)

$^1\text{H}$  NMR (600 MHz,  $\text{CDCl}_3$ ):  $\delta$  6.83 (1H for one diastereomer, d,  $J = 700.39$  Hz), 6.82 (1H for one diastereomer, d,  $J = 701.08$  Hz), 4.91 (1H, s), 4.65 (1H, d,  $J = 6.19$  Hz), 4.53 (1H, d,  $J = 5.50$  Hz), 4.45-4.41 (1H, m), 4.29 (1H, t,  $J = 6.87$  Hz), 4.06-3.93 (2H, m), 3.27 (3H for one diastereomer, d,  $J = 1.37$  Hz), 3.26 (3H for one diastereomer, s), 1.89-1.87 (2H, m), 1.70-1.68 (2H, m), 1.53-1.36 (6H, m), 1.32-1.15 (6H, m).  $^{13}\text{C}$  NMR (150 MHz,  $\text{CDCl}_3$ ):  $\delta$  112.55, 109.33, 84.94, 84.92, 84.90, 81.42, 81.35, 76.25, 76.21, 65.06, 65.02, 64.78, 64.74, 55.04, 55.01, 33.64, 33.61, 33.42, 26.32, 24.93, 24.84, 23.41;  $^{31}\text{P}$  NMR (243 MHz,  $\text{CDCl}_3$ )  $\delta$  6.77, 6.69; HRMS (APCI-): calcd. for  $\text{C}_{15}\text{H}_{26}\text{O}_7\text{P}$  ( $[\text{M}-\text{H}]^-$ ):



349.1416; found: 349.1379; IR (neat): 3016, 2935, 2359, 1559, 1395, 1340, 1278, 1207, 1132, 1065, 1065, 881, 636  $\text{cm}^{-1}$ .

Benzyl ((1*S*,2*R*,5*S*)-2-isopropyl-5-methylcyclohexyl) phosphite (**4h**)

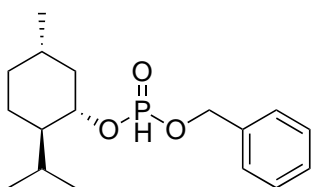

Pale yellow oil, 87.8 mg (91%), dr = 47:53

$^1\text{H}$  NMR (600 MHz,  $\text{CDCl}_3$ ):  $\delta$  7.37-7.23 (5H, m), 6.86 (1H for one diastereomer, d,  $J_{\text{P-H}} = 697.6$  Hz), 6.83 (1H for the other diastereomer, d,  $J = 698.4$  Hz), 5.08-4.98 (2H, m), 4.23-4.13 (1H, m), 2.09-1.95 (2H, m), 1.62-1.55 (2H, m), 1.40-1.25 (2H, m), 1.15-1.05 (1H, m), 0.95-0.65 (11H, m);  $^{13}\text{C}$  NMR (125 MHz,  $\text{CDCl}_3$ ):  $\delta$  135.73, 135.69, 128.55, 128.48, 127.90, 127.88, 78.37, 78.31, 78.14, 78.08, 67.02, 66.98, 66.92, 66.88, 48.20, 48.19, 48.16, 48.13, 43.1, 42.8, 33.8, 31.5, 25.7, 25.5, 22.80, 22.78, 21.8, 20.8, 20.7, 15.6, 15.4;  $^{31}\text{P}$  NMR (243 MHz,  $\text{CDCl}_3$ ):  $\delta$  7.45, 6.85; HRMS (DART):  $m/z$  calcd. for  $\text{C}_{34}\text{H}_{55}\text{O}_6\text{P}_2$  ( $[\text{2M}+\text{H}]^+$ ): 621.34739; found: 621.34711; IR (neat): 2953, 2916, 2870, 2427, 1457, 1371, 1255, 985, 964, 737, 697  $\text{cm}^{-1}$ .

Benzyl ((1*S*,2*S*,4*R*)-bicyclo[2.2.1]heptan-2-yl) phosphite (**4i**)

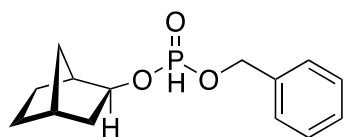

Pale yellow oil, 77.1 mg (90%), dr = 50:50

$^1\text{H}$  NMR (600 MHz,  $\text{CDCl}_3$ ):  $\delta$  7.34-7.24 (5H, m), 6.79 (1H for one diastereomer, d,  $J_{\text{P-H}} = 694.0$  Hz), 6.79 (1H for the other diastereomer, d,  $J = 697.0$  Hz), 5.03 (2H for one diastereomer, d,  $J = 9.6$  Hz), 5.02 (2H for the other diastereomer, d,  $J = 9.6$  Hz), 4.31 (1H, t,  $J = 6.9$  Hz), 2.31 (1H for one diastereomer, d,  $J = 4.8$  Hz), 2.28 (2H for the other diastereomer, d,  $J = 4.8$  Hz), 2.21 (1H, d,  $J = 2.8$  Hz), 1.62 (1H for one diastereomer, ddd,  $J = 14.3, 6.9, 2.8$  Hz), 1.60 (1H for the other diastereomer, ddd,  $J = 14.3, 6.9, 2.8$  Hz), 1.56-1.46 (2H, m), 1.46-1.38 (1H, m), 1.38-1.28 (1H, m), 1.12-1.08 (1H, m), 1.00-0.90 (2H, m);  $^{13}\text{C}$  NMR (150 MHz,  $\text{CDCl}_3$ ):  $\delta$  135.8, 135.7, 128.6, 128.5, 127.9, 79.75, 79.71, 79.67, 67.1, 67.0, 43.0, 42.8, 40.63, 40.60, 40.56, 35.3, 34.7, 27.9, 23.78, 23.76;  $^{31}\text{P}$  NMR (243 MHz,  $\text{CDCl}_3$ ):  $\delta$  6.85; HRMS (DART):  $m/z$  calcd. for  $\text{C}_{28}\text{H}_{39}\text{O}_6\text{P}_2$  ( $[\text{2M}+\text{H}]^+$ ): 533.22219; found: 533.22205; IR (neat): 2959, 2873, 1457, 1255, 971, 734, 697  $\text{cm}^{-1}$ .

Benzyl ((1*S*,2*R*,4*S*)-1,7,7-trimethylbicyclo[2.2.1]heptan-2-yl) phosphite (**4j**)

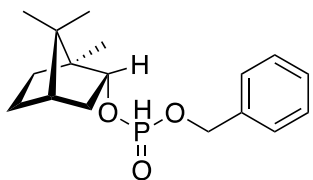

Pale yellow oil, 90.8 mg (99%), dr = 49:51

$^1\text{H}$  NMR (600 MHz,  $\text{CDCl}_3$ ):  $\delta$  7.45-7.32 (5H, m), 6.90 (1H for one diastereomer, d,  $J_{\text{P-H}} = 699.7$  Hz), 6.90 (1H for the other diastereomer, d,  $J = 699.7$  Hz), 5.11 (2H for one diastereomer, d,  $J = 9.6$  Hz), 5.11 (2H for the other diastereomer, d,  $J = 9.7$  Hz), 4.68-4.61 (1H for one diastereomer, m), 4.61-4.54 (1H for one diastereomer, m), 2.30-2.21 (1H, m), 1.95-1.87 (1H, m), 1.77-1.69 (1H, m), 1.35-1.15 (3H, m), 0.88-0.80 (9H, m);  $^{13}\text{C}$  NMR (150 MHz,  $\text{CDCl}_3$ ):  $\delta$  135.8, 135.7, 128.6, 128.5, 127.9, 82.7, 82.66, 82.64, 67.03, 66.99, 49.5, 47.62, 47.59, 44.8, 37.05, 37.03,

36.97, 36.95, 27.9, 26.4, 26.3, 19.8, 18.6, 13.2, 13.1;  $^{31}\text{P}$  NMR (243 MHz,  $\text{CDCl}_3$ ):  $\delta$  8.42, 8.28; HRMS (DART):  $m/z$  calcd. for  $\text{C}_{17}\text{H}_{25}\text{O}_3\text{P}$  ( $[\text{M}+\text{H}]^+$ ): 309.16196; found: 309.16232; IR (neat): 2953, 2878, 1457, 1255, 1040, 967, 735, 697 591, 540  $\text{cm}^{-1}$ .

Benzyl octan-2-yl phosphite (**4k**)

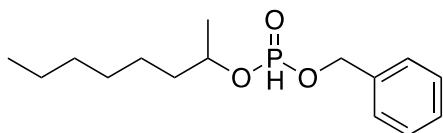

Pale yellow oil, 81.2 mg (95%), dr = 50:50

$^1\text{H}$  NMR (600 MHz,  $\text{CDCl}_3$ ):  $\delta$  7.43-7.30 (5H, m), 6.90 (1H, d,  $J_{\text{P-H}} = 697.0$  Hz), 5.13-5.05 (2H, m), 4.62-4.52 (1H, m), 1.68-1.58 (1H, m), 1.55-1.45 (1H, m), 1.40-1.20 (11H, m), 0.92-0.83 (3H, m);  $^{13}\text{C}$  NMR (125 MHz,  $\text{CDCl}_3$ ):  $\delta$  135.75 (for one diastereomer, d,  $J = 6.0$  Hz), 135.71 (for the other diastereomer, d,  $J = 7.1$  Hz), 128.6, 128.5, 127.8, 74.9 (d,  $J = 6.0$  Hz), 67.0 (for one diastereomer, d,  $J = 6.0$  Hz), 66.9 (for the other diastereomer, d,  $J = 6.0$  Hz), 37.5 (for one diastereomer, d,  $J = 4.8$  Hz), 37.4 (for the other diastereomer, d,  $J = 6.0$  Hz), 31.6, 30.8, 28.9, 25.2 (for one diastereomer), 25.0 (for the other diastereomer), 22.0 (for one diastereomer, d,  $J = 2.4$  Hz), 21.7 (for the other diastereomer, d,  $J = 3.6$  Hz), 14.0;  $^{31}\text{P}$  NMR (243 MHz,  $\text{CDCl}_3$ ):  $\delta$  7.18, 6.91; HRMS (DART):  $m/z$  calcd. for  $\text{C}_{34}\text{H}_{55}\text{O}_6\text{P}_2$  ( $[\text{2M}+\text{H}]^+$ ): 621.34739; found: 621.34711; IR (neat): 2953, 2916, 2870, 2427, 1457, 1371, 1255, 985, 964, 737, 697  $\text{cm}^{-1}$ .

Benzyl oct-1-en-3-yl phosphite (**4l**)

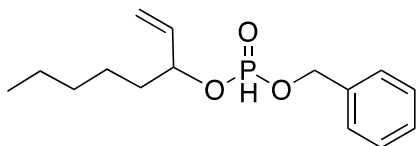

Yellow oil, 50.0 mg (59%), dr = 49:51

$^1\text{H}$  NMR (600 MHz,  $\text{CDCl}_3$ ):  $\delta$  7.45-7.31 (5H, m), 6.911 (1H for one diastereomer, d,  $J_{\text{P-H}} = 700.4$  Hz), 6.905 (1H for the other diastereomer, d,  $J = 703.1$  Hz), 5.87-5.77 (1H, m), 5.30 (1H, t,  $J = 16.8$  Hz), 5.21 (1H, dd,  $J = 14.8, 10.7$  Hz), 5.16-5.03 (2H, m), 4.82 (1H, dt,  $J = 13.8, 6.9$  Hz), 1.74-1.66 (1H, m), 1.64-1.56 (1H, m), 1.43-1.10 (6H, m), 0.88 (3H, t,  $J = 6.8$  Hz);  $^{13}\text{C}$  NMR (150 MHz,  $\text{CDCl}_3$ ):  $\delta$  136.80, 136.77, 136.51, 136.49, 135.7, 128.6, 128.5, 127.89, 127.87, 117.7, 117.5, 78.85, 78.80, 78.7, 78.6, 66.98, 66.96, 66.94, 66.91, 35.9, 35.84, 35.80, 35.76, 31.4, 24.5, 24.4, 22.4, 13.9;  $^{31}\text{P}$  NMR (243 MHz,  $\text{CDCl}_3$ ):  $\delta$  7.26, 7.15; HRMS (DART):  $m/z$  calcd. for  $\text{C}_{30}\text{H}_{47}\text{O}_6\text{P}_2$  ( $[\text{2M}+\text{H}]^+$ ): 565.28479; found: 565.28167; IR (neat): 2929, 2859, 1457, 1255, 1058, 965, 737, 697  $\text{cm}^{-1}$ .

benzyl ((3*S*,8*S*,9*S*,10*R*,13*R*,14*S*,17*R*)-10,13-dimethyl-17-((*R*)-6-methylheptan-2-yl)-2,3,4,7,8,9,10,11,12,13,14,15,16,17-tetradecahydro-1*H*-cyclopenta[*a*]phenanthren-3-yl) phosphite (**4m**)

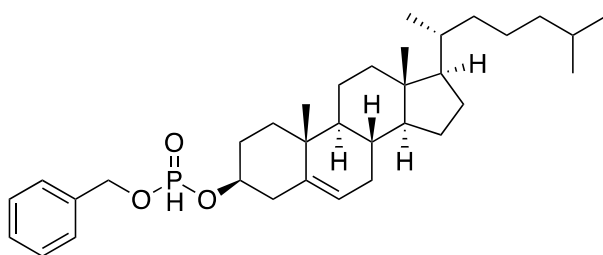

White solid, 136.1 mg (84%)

$^1\text{H}$  NMR (600 MHz,  $\text{CDCl}_3$ ):  $\delta$  7.34-7.24 (5H, m), 6.83 (1H, d,  $J_{\text{P-H}} = 698.4$  Hz), 5.30-5.24 (1H, m), 5.03 (2H, d,  $J = 8.9$  Hz), 4.24-4.10 (1H, m), 2.41-2.24 (2H, m), 1.98-1.80 (3H, m), 1.80-1.70 (2H, m), 1.70-1.57 (1H, m), 1.57-

1.14 (10H, m), 1.14-0.87 (12H, m), 0.87-0.70 (10H, m), 0.60 (3H, s);  $^{13}\text{C}$  NMR (150 MHz,  $\text{CDCl}_3$ ):  $\delta$  139.1, 135.72, 135.68, 128.6, 128.5, 127.9, 123.1, 77.07, 77.05, 77.03, 67.06, 67.04, 67.00, 56.6, 56.1, 49.9, 42.2, 40.2, 40.1, 40.04, 40.01, 39.6, 39.4, 36.8, 36.3, 36.1, 35.7, 31.8, 31.7, 29.89, 29.86, 29.77, 29.74, 28.1, 27.9, 24.2, 23.8, 22.8, 22.5, 21.0, 19.2, 18.7, 11.8;  $^{31}\text{P}$  NMR (243 MHz,  $\text{CDCl}_3$ ):  $\delta$  6.69; HRMS (DART):  $m/z$  calcd. for  $\text{C}_{34}\text{H}_{54}\text{O}_3\text{P}$  ( $[\text{M}+\text{H}]^+$ ): 541.38106; found: 541.38290; IR (neat): 2936, 1457, 1382, 1238, 1070, 967, 734, 697, 593, 548, 478  $\text{cm}^{-1}$ .

O-benzyl O-cyclohexyl S-hydrogen phosphorothioate-triethylamine salt (**4a-S**)

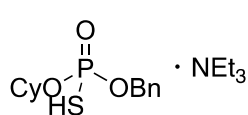

Pale yellow oil, 93.4 mg (81%)

$^1\text{H}$  NMR (500 MHz,  $\text{CDCl}_3$ )  $\delta$  12.25 (s, 1H), 7.36 (d,  $J = 7.3$  Hz, 2H), 7.25 (t,  $J = 7.4$  Hz, 2H), 7.19 (t,  $J = 7.3$  Hz, 1H), 4.97 (ddd,  $J = 33.8, 12.3, 8.1$  Hz, 2H), 4.34-4.30 (m, 1H), 3.02 (qd,  $J = 7.3, 4.4$  Hz, 6H), 1.93 (dd,  $J = 15.4, 11.7$  Hz, 2H), 1.68-1.63 (m, 2H), 1.47-1.36 (m, 3H), 1.28-1.20 (m, 11H), 1.15-1.11 (m, 1H);  $^{13}\text{C}$  NMR (126 MHz,  $\text{CDCl}_3$ )  $\delta$  138.7 (d,  $J = 9.1$  Hz), 128.1, 127.5, 127.3, 75.3 (d,  $J = 6.3$  Hz), 67.6 (d,  $J = 5.1$  Hz), 45.5, 33.9, 33.9, 33.7 (d,  $J = 4.2$  Hz), 25.6, 24.2, 8.6;  $^{31}\text{P}$  NMR (243 MHz,  $\text{CDCl}_3$ ):  $\delta$  57.66; HRMS (DART):  $m/z$  calcd. for  $\text{C}_{13}\text{H}_{18}\text{O}_3\text{PS}$  ( $[\text{M}-\text{HNEt}_3]^-$ ): 285.07198; found: 285.07188; IR (neat): 2932, 2856, 1453, 1116, 1020, 990, 865, 792, 744, 698, 460  $\text{cm}^{-1}$ .

((3*aR*,4*R*,6*R*,6*aR*)-6-methoxy-2,2-dimethyltetrahydrofuro[3,4-*d*][1,3]dioxol-4-yl)methyl ((2*R*,3*S*,5*S*)-5-methoxy-2-((trityloxy)methyl)tetrahydrofuran-3-yl) phosphonate (**4n**)

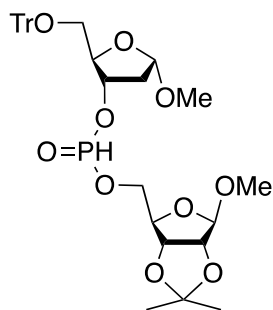

White gum, 116.6 mg (61%),  $dr = 59:41$

$^1\text{H}$  NMR (600 MHz,  $\text{CDCl}_3$ ):  $\delta$  7.43 (6H, d,  $J = 7.6$  Hz), 7.23 (6H, t,  $J = 7.6$  Hz), 7.16 (3H, t,  $J = 7.2$  Hz), 6.86 (1H for one diastereomer, d,  $J_{\text{P-H}} = 711.4$  Hz), 6.81 (1H for the other diastereomer, d,  $J_{\text{P-H}} = 713.4$  Hz), 5.12 (1H for one diastereomer, d,  $J = 4.8$  Hz), 5.10 (1H for the other diastereomer, d,  $J = 5.5$  Hz), 5.04-4.93 (1H, m), 4.96 (1H for one diastereomer, s), 4.94 (1H for the other diastereomer, s), 4.69 (1H for one diastereomer, d,  $J = 6.2$  Hz), 4.58 (1H, t,  $J = 5.5$  Hz), 4.54 (1H for the other diastereomer, d,  $J = 5.5$  Hz), 4.37-4.24 (2H, m), 4.08-3.98 (1H and 1H for one diastereomer, m), 3.91-3.85 (1H for the other diastereomer, m), 3.42 (3H for one diastereomer, s), 3.41 (3H for the other diastereomer, s), 3.34-3.29 (1H, m), 3.29 (3H for one diastereomer, s), 3.27 (3H for the

other diastereomer, s), 3.23-3.16 (1H, m), 2.51-2.41 (1H, m), 2.24 (1H for one diastereomer, d,  $J = 11.0$  Hz), 2.21 (1H for the other diastereomer, d,  $J = 10.3$  Hz), 1.47 (3H for one diastereomer, s), 1.46 (3H for the other diastereomer, s), 1.31 (3H for one diastereomer, s), 1.27 (3H for the other diastereomer, s);  $^{13}\text{C}$  NMR (150 MHz,  $\text{CDCl}_3$ ):  $\delta$  143.6, 128.6, 127.81, 127.76, 127.1, 112.5, 109.3, 105.1, 105.0, 86.8, 86.7, 84.93, 84.88, 84.80, 84.75, 84.64, 84.58, 83.61, 83.57, 83.21, 83.17, 81.4, 81.2, 76.6, 76.5, 76.32, 76.28, 65.49, 65.45, 65.03, 64.99, 63.4, 63.3, 55.09, 55.07, 55.0, 40.64, 40.62, 40.22, 40.19, 26.3, 24.85, 24.83;  $^{31}\text{P}$  NMR (243 MHz,  $\text{CDCl}_3$ ):  $\delta$  7.72, 7.58; HRMS (ESI):  $m/z$  calcd. for  $\text{C}_{34}\text{H}_{42}\text{O}_{10}\text{P}$  ( $[\text{M}+\text{H}]^+$ ): 641.25156; found: 641.24924; IR (neat): 3059, 2989, 2935, 2835, 1598, 1491, 1450, 1372, 1260, 1090, 1047, 961, 901, 868, 823, 764, 748, 735, 704, 643, 633, 577, 516, 461  $\text{cm}^{-1}$ .

Ethyl (((3*aR*,4*R*,6*R*,6*aR*)-6-methoxy-2,2-dimethyltetrahydrofuro[3,4-*d*][1,3]dioxol-4-yl)methyl) ((2*R*,3*S*,5*S*)-5-methoxy-2-((trityloxy)methyl)tetrahydrofuran-3-yl) phosphate (**5a**)

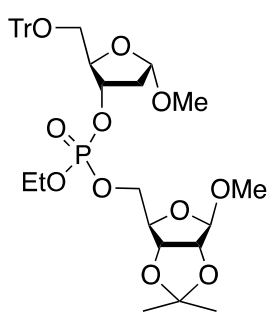

White gum, 129.9 mg (63%),  $dr = 59:41$

$^1\text{H}$  NMR (500 MHz,  $\text{CDCl}_3$ ):  $\delta$  7.43 (6H, d,  $J = 8.3$  Hz), 7.30 (6H, t,  $J = 7.2$  Hz), 7.23 (3H, t,  $J = 7.2$  Hz), 5.19 (1H for one diastereomer, d,  $J = 4.8$  Hz), 5.18 (1H for the other diastereomer, d,  $J = 5.5$  Hz), 4.95 (1H for one diastereomer, s), 4.94 (1H for the other diastereomer, s), 4.92-4.84 (1H, m), 4.69 (1H for one diastereomer, d,  $J = 6.2$  Hz), 4.61 (1H for the other diastereomer, d,  $J = 5.5$  Hz), 4.57 (1H for one diastereomer, d,  $J = 6.2$  Hz), 4.53 (1H for the other diastereomer, d,  $J = 5.5$  Hz), 4.40-4.25 (2H, m), 4.20-3.93 (3H and 1H for one diastereomer, m), 3.93-3.84 (1H for the other diastereomer, m), 3.40 (3H, s), 3.35-3.20 (1H, m), 3.28 (3H for one diastereomer, s), 3.26 (3H for the other diastereomer, s), 3.17 (1H for one diastereomer, d,  $J = 4.1$  Hz), 3.15 (1H for the other diastereomer, d,  $J = 3.4$  Hz), 2.47-2.38 (1H, m), 2.28-2.22 (1H, m), 1.47 (3H for one diastereomer, s), 1.45 (3H for the other diastereomer, s), 1.33-1.18 (6H, m);  $^{13}\text{C}$  NMR (126 MHz,  $\text{CDCl}_3$ ):  $\delta$  143.71, 143.70, 128.6, 127.8, 127.0, 112.5, 109.3, 105.11, 105.06, 86.7, 84.99, 84.96, 84.64, 84.56, 84.51, 83.52, 83.47, 83.42, 83.38, 81.5, 81.4, 78.2, 78.1, 76.8, 67.03, 66.98, 64.2, 64.1, 64.0, 63.7, 55.0, 54.9, 40.2, 26.3, 24.9, 24.83, 16.02, 15.97;  $^{31}\text{P}$  NMR (202 MHz,  $\text{CDCl}_3$ ):  $\delta$  -1.65, -1.76; HRMS (ESI):  $m/z$  calcd. for  $\text{C}_{36}\text{H}_{46}\text{O}_{11}\text{P}$  ( $[\text{M}+\text{H}]^+$ ): 685.27777; found: 685.27634; IR (neat): 2982, 2936, 2833, 1598, 1491, 1450, 1372, 1267, 1210, 1161, 1093, 1047, 1013, 963, 901, 868, 827, 765, 748, 704, 643, 633, 580, 516, 423  $\text{cm}^{-1}$ .

methyl 6-(((4,4-diphenylcyclohexyl)oxy)phosphoryl)oxy)hexanoate (**4o**)

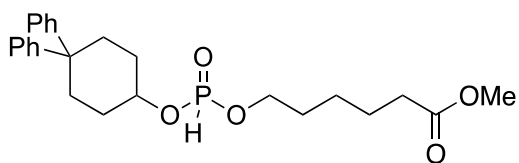

White foam, 114.7 mg (87%)

$^1\text{H}$  NMR (500 MHz,  $\text{CDCl}_3$ ): 7.28-7.11 (m, 10H), 6.82 (d,  $J_{\text{P-H}} = 690$  Hz, 1H), 4.61 (tt,  $J = 11.6, 3.8$  Hz, 1H), 4.07-3.98 (m, 2H), 3.64 (s, 3H), 2.56 (t,  $J = 9.2$  Hz, 2H), 2.30 (t,  $J = 7.4$  Hz, 2H), 2.24-2.19 (m, 2H), 1.93-1.88 (m, 2H), 1.84-1.78 (m, 2H), 1.71-1.61 (m, 4H), 1.43-1.36 (m, 2H);  $^{13}\text{C}$  NMR (126 MHz,  $\text{CDCl}_3$ ):  $\delta$  173.9, 147.3, 128.6, 128.5, 127.1, 126.8, 126.0, 125.9, 74.9, 65.4, 65.4, 51.6, 45.5, 33.9, 32.8, 30.2, 30.1, 30.0, 29.9, 29.7, 29.7, 25.2, 24.5;  $^{31}\text{P}$  NMR (203 MHz,  $\text{CDCl}_3$ ):  $\delta$  6.93; HRMS (DART):  $m/z$  calcd. for  $\text{C}_{25}\text{H}_{34}\text{O}_5\text{P}$  ( $[\text{M}+\text{H}]^+$ ): 445.21439; found: 445.21422; IR (neat):  $\text{cm}^{-1}$ .

methyl 6-(((benzyloxy)((4,4-diphenylcyclohexyl)oxy)phosphoryl)oxy)hexanoate (**5b**)

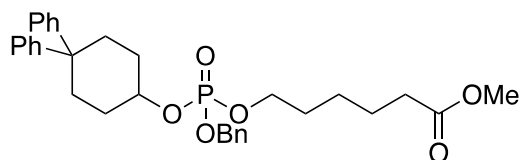

White foam, 88.1 mg (64%)

$^1\text{H}$  NMR (500 MHz,  $\text{CDCl}_3$ ):  $\delta$  7.37-7.12 (m, 15H), 5.04 (d,  $J = 8.3$  Hz, 2H), 4.51-4.48 (m, 1H), 3.97 (qd,  $J = 6.5, 2.0$  Hz, 2H), 3.64 (s, 3H), 2.52 (t,  $J = 4.9$  Hz, 2H), 2.29 (dt,  $J = 23.6, 7.5$  Hz, 2H), 2.17 (dd,  $J = 20.8, 10.1$  Hz, 2H), 1.90-1.73 (m, 4H), 1.67-1.57 (m, 4H), 1.39-1.32 (m, 2H);  $^{13}\text{C}$  NMR (126 MHz,  $\text{CDCl}_3$ )  $\delta$  174.0, 136.2, 136.2, 128.6, 128.5, 128.5, 127.9, 127.1, 126.9, 125.9, 125.9, 69.1, 69.1, 67.5, 67.4, 51.6, 45.5, 33.9, 32.8, 30.0, 30.0, 29.5, 29.4, 25.1, 24.5;  $^{31}\text{P}$  NMR (203 MHz,  $\text{CDCl}_3$ ):  $\delta$  -0.92; HRMS (DART):  $m/z$  calcd. for  $\text{C}_{32}\text{H}_{40}\text{O}_6\text{P}$  ( $[\text{M}+\text{H}]^+$ ): 551.25570; found: 551.25599; IR (neat):  $\text{cm}^{-1}$ .

6-(((benzyloxy)((4,4-diphenylcyclohexyl)oxy)phosphoryl)oxy)hexanoic acid (**5c**)

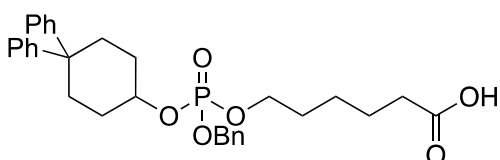

White foam, 70.4 mg (82%)

$^1\text{H}$  NMR (500 MHz,  $\text{CDCl}_3$ ):  $\delta$  7.37-7.12 (m, 15H), 5.04 (d,  $J = 8.4$  Hz, 2H), 4.52-4.49 (m, 1H), 3.97 (qd,  $J = 6.7, 1.8$  Hz, 2H), 2.52-2.48 (m, 2H), 2.30 (t,  $J = 7.4$  Hz, 2H), 2.20-2.14 (m, 2H), 1.87-1.75 (m, 4H), 1.65-1.58 (m, 4H), 1.40-1.34 (m, 2H);  $^{13}\text{C}$  NMR (126 MHz,  $\text{CDCl}_3$ )  $\delta$  178.3, 136.2, 136.1, 128.6, 128.5, 128.5, 128.5, 127.9, 127.1, 126.9, 125.9, 125.9, 69.2, 69.2, 67.6, 67.5, 45.5, 33.8, 30.0, 29.9, 29.4, 29.4, 25.0, 24.3;  $^{31}\text{P}$  NMR (203 MHz,  $\text{CDCl}_3$ ):  $\delta$  -1.05; HRMS (DART):  $m/z$  calcd. for  $\text{C}_{31}\text{H}_{38}\text{O}_6\text{P}$  ( $[\text{M}+\text{H}]^+$ ): 537.24005; found: 537.23991; IR (neat):  $\text{cm}^{-1}$ .

6-(((4,4-diphenylcyclohexyl)oxy)(hydroxy)phosphoryl)oxy)hexanoic acid (**5d**)

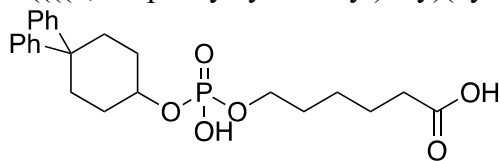

White foam, 65.9 mg (91%)

$^1\text{H}$  NMR (500 MHz,  $\text{MeOH-d}_4$ )  $\delta$  7.30-7.19 (m, 8H), 7.08 (dd,  $J = 16.7, 7.4$  Hz, 2H), 4.34 (d,  $J = 7.0$  Hz, 1H), 3.90 (s, 2H), 2.56 (s, 2H), 2.28-2.19 (m, 4H), 1.86 (s, 2H), 1.72-1.57 (m, 6H), 1.40 (s, 2H);  $^{13}\text{C}$  NMR (126 MHz,  $\text{MeOH-d}_4$ )  $\delta$  178.3, 136.2, 136.1, 128.6, 128.5, 128.5, 127.9, 127.1, 126.9, 125.9, 125.9, 69.2, 69.2, 67.6, 67.5, 45.5, 33.8, 30.0, 29.9, 29.4, 29.4, 25.0, 24.3;  $^{31}\text{P}$  NMR (203 MHz,  $\text{MeOH-d}_4$ ):  $\delta$  -1.05; HRMS (DART):  $m/z$  calcd. for  $\text{C}_{31}\text{H}_{38}\text{O}_6\text{P}$  ( $[\text{M}+\text{H}]^+$ ): 537.24005; found: 537.23991; IR (neat):  $\text{cm}^{-1}$ .

d<sub>4</sub>)  $\delta$  176.2, 128.0, 127.9, 126.9, 126.6, 125.3, 73.8, 65.4, 45.3, 33.6, 32.8, 32.7, 30.1, 29.6, 25.1, 24.4;  $^{31}\text{P}$  NMR (203 MHz, MeOH-d<sub>4</sub>):  $\delta$  0.09 (br)

(2*R*,3*S*,5*R*)-5-(3-((benzyloxy)methyl)-5-methyl-2,4-dioxo-3,4-dihydropyrimidin-1(2*H*)-yl)-2-((trityloxy)methyl)tetrahydrofuran-3-yl (2,2,2-trifluoroethyl) phosphonate (**3af**)

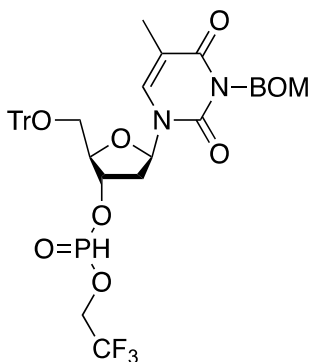

White solid, 576.0 mg (74%), *dr*: ca 1:1

$^1\text{H}$  NMR (600 MHz,  $\text{CDCl}_3$ ):  $\delta$  7.51 (1H, s), 7.48-7.10 (20H, m), 6.94 (1H for one diastereomer, d,  $J_{\text{P-H}} = 738.9$  Hz), 6.93 (1H for the other diastereomer, d,  $J_{\text{P-H}} = 727.2$  Hz), 6.53-6.40 (1H, m), 5.49 (2H, s), 5.30-5.20 (1H, m), 4.71 (2H, s), 4.47-4.18 (3H, m), 3.60-3.50 (1H, m), 3.40 (1H, d,  $J = 9.6, 21.6$  Hz), 3.38 (1H for the other diastereomer, d,  $J = 10.3$  Hz), 2.69-2.55 (1H, m), 2.47-2.35 (1H, m), 1.464 (3H for one diastereomer, s), 1.456 (3H for the other diastereomer, s);  $^{13}\text{C}$  NMR (150 MHz,  $\text{CDCl}_3$ ):  $\delta$  163.2, 150.9, 142.9, 142.8, 137.9, 133.70, 137.68, 128.5, 128.2, 128.0, 127.6, 127.51, 125.2, 125.13, 125.09, 125.0, 123.33, 123.30, 123.26, 123.2, 121.49, 121.45, 121.42, 121.37, 119.7, 119.61, 119.58, 119.5, 110.94, 110.88, 87.7, 84.9, 84.8, 84.34, 84.30, 84.28, 72.1, 70.5, 63.97, 62.91, 62.4, 62.32, 62.28, 62.25, 62.10, 62.07, 62.03, 62.00, 61.85, 61.82, 61.78, 61.75, 61.60, 61.57, 61.53, 61.50, 39.3, 39.24, 39.19, 39.17, 12.39, 12.36;  $^{31}\text{P}$  NMR (243 MHz,  $\text{CDCl}_3$ ):  $\delta$  7.77;  $^{19}\text{F}$  NMR (565 MHz,  $\text{CDCl}_3$ ):  $\delta$  -74.9, -75.0; HRMS (DART):  $m/z$  calcd. for  $\text{C}_{39}\text{H}_{39}\text{F}_3\text{N}_2\text{O}_8\text{P}$  ( $[\text{M}+\text{H}]^+$ ): 751.23961; found: 751.23647; IR (neat): 3059, 3032, 2359, 1709, 1652, 1491, 1465, 1448, 1362, 1275, 1175, 1074, 1028, 970, 903, 773, 747, 698, 633, 563, 467  $\text{cm}^{-1}$ .

(2*R*,3*S*,5*R*)-5-(3-benzoyl-5-methyl-2,4-dioxo-3,4-dihydropyrimidin-1(2*H*)-yl)-2-((((((2*R*,3*S*,5*R*)-5-(3-((benzyloxy)methyl)-5-methyl-2,4-dioxo-3,4-dihydropyrimidin-1(2*H*)-yl)-2-((trityloxy)methyl)tetrahydrofuran-3-yl)oxy)(hydroxy)phosphaneyl)oxy)methyl)tetrahydrofuran-3-yl benzoate (**6a**)

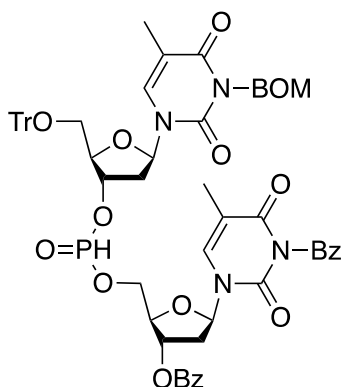

White solid, 232.1 mg (70%), *dr* = 61:39

$^1\text{H}$  NMR (600 MHz,  $\text{CDCl}_3$ ):  $\delta$  8.04-7.97 (2H, m), 7.97-7.90 (2H, m), 7.68-7.20 (28H and 0.5H for P-H bond, m), 6.51-6.34 (2H and 0.5H for P-H bond, m), 5.59-5.34 (3H, m), 5.33-5.23 (1H, m), 4.71 (2H for one diastereomer, s), 4.68 (2H for the other diastereomer, s), 4.60-4.20 (4H, m), 3.63-3.51 (1H, m), 3.47-3.38 (1H, m), 2.71-2.57 (2H, m), 2.50-2.26 (2H, m), 2.00 (3H for one diastereomer, s), 1.98 (3H for the other diastereomer, s), 1.47 (3H for one diastereomer, s), 1.46 (3H for the other diastereomer, s);  $^{13}\text{C}$  NMR (125 MHz,  $\text{CDCl}_3$ ):  $\delta$  168.6, 165.7, 165.6, 163.0, 162.3, 150.7, 149.09, 149.05, 142.72, 142.68, 137.7, 134.8, 133.6, 133.50, 133.47, 131.2, 130.1, 129.4, 128.9, 128.3, 127.99, 127.97, 127.8, 127.5, 127.3, 111.7, 111.6, 111.44, 111.42, 110.6, 87.52, 87.49, 85.2, 85.0, 84.9,

84.8, 84.7, 84.41, 84.37, 84.1, 84.0, 82.70, 82.65, 82.6, 82.5, 76.6, 76.5, 73.9, 73.8, 71.9, 71.8, 70.3, 70.2, 65.43, 65.39, 65.0, 64.9, 62.9, 53.3, 39.2, 39.03, 39.00, 36.9, 36.7, 12.3, 12.21, 12.19; <sup>31</sup>P NMR (243 MHz, CDCl<sub>3</sub>): δ 9.29, 7.69; HRMS (ESI): m/z calcd. for C<sub>61</sub>H<sub>58</sub>N<sub>4</sub>O<sub>14</sub>P ([M+H]<sup>+</sup>): 1101.36871; found: 1101.37185; IR (neat): 3062, 1749, 1705, 1664, 1600, 1491, 1450, 1364, 1317, 1270, 1180, 1097, 1037, 1027, 968, 907, 773, 763, 708, 633, 563, 426, 403 cm<sup>-1</sup>.

*Tert*-butyl (1-((3*aR*,4*R*,6*R*,6*aR*)-6-((((((2*R*,3*S*,5*R*)-5-(3-((benzyloxy)methyl)-5-methyl-2,4-dioxo-3,4-dihydropyrimidin-1(2*H*)-yl)-2-((trityloxy)methyl)tetrahydrofuran-3-yl)oxy)(hydroxy)phosphaneyl)oxy)methyl)-2,2-dimethyltetrahydrofuro[3,4-*d*][1,3]dioxol-4-yl)-2-oxo-1,2-dihydropyrimidin-4-yl)(*tert*-butoxycarbonyl)carbamate (**6b**)

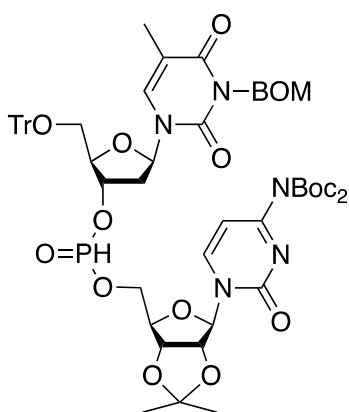

White solid, 166.5 mg (49%), *dr* = 51:49

<sup>1</sup>H NMR (600 MHz, CDCl<sub>3</sub>): δ 7.56-7.50 (2H, m), 7.48-7.20 (22H and 0.5H for P-H bond, m), 7.04 (1H for one diastereomer, d, *J* = 7.6 Hz), 7.03 (1H for the other diastereomer, d, *J* = 7.6 Hz), 6.46-6.40 (1H, m), 6.28 (0.5H for P-H bond of one diastereomer, s), 6.22 (0.5H for P-H bond of the other diastereomer, s), 5.52 (1H, d, *J* = 17.9 Hz), 5.49 (2H, s), 5.27-5.19 (1H, m), 5.16 (1H for one diastereomer, d, *J* = 6.2 Hz), 5.13 (1H for the other diastereomer, d, *J* = 6.2 Hz), 4.98-4.92 (1H for one

diastereomer, m), 4.91-4.86 (1H for the other diastereomer, m), 4.71 (2H, s), 4.42-4.31 (2H and 1H for one diastereomer, m), 4.29-4.18 (1H and 1H for the other diastereomer, m), 3.55-3.45 (1H, m), 3.44-3.30 (1H, m), 2.65-2.55 (1H, m), 2.44-2.34 (1H, m), 1.553 (18H for one diastereomer, s), 1.546 (18H for the other diastereomer, s), 1.54 (3H, s), 1.454 (3H for one diastereomer, s), 1.448 (3H for the other diastereomer, s), 1.314 (3H for one diastereomer, s), 1.310 (3H for the other diastereomer, s); <sup>13</sup>C NMR (150 MHz, CDCl<sub>3</sub>): δ 163.27, 163.25, 162.9, 153.7, 150.8, 149.2, 146.9, 146.7, 142.94, 142.92, 137.9, 133.94, 133.86, 128.5, 128.2, 128.0, 127.9, 127.6, 127.54, 127.50, 127.44, 127.42, 114.1, 114.0, 110.7, 110.6, 98.2, 98.1, 96.2, 87.6, 87.5, 85.1, 84.88, 84.86, 84.6, 84.50, 84.48, 84.3, 81.48, 81.45, 76.24, 76.21, 76.16, 76.1, 72.1, 70.5, 66.2, 66.1, 65.89, 65.85, 62.9, 60.3, 39.29, 39.27, 27.7, 27.6, 26.91, 26.89, 25.02, 24.97, 20.9, 14.1, 12.3; <sup>31</sup>P NMR (243 MHz, CDCl<sub>3</sub>): δ 8.37, 8.12; HRMS (ESI): m/z calcd. for C<sub>59</sub>H<sub>68</sub>N<sub>5</sub>O<sub>16</sub>P ([M+H]<sup>+</sup>): 1134.44769; found: 1134.45125; IR (neat): 2985, 2929, 1777, 1744, 1709, 1668, 1560, 1491, 1450, 1395, 1370, 1318, 1260, 1211, 1155, 1074, 1037, 1028, 960, 904, 857, 787, 773, 747, 698, 633, 563, 418 cm<sup>-1</sup>.

(2*R*,3*S*,5*R*)-5-(3-benzoyl-5-methyl-2,4-dioxo-3,4-dihydropyrimidin-1(2*H*)-yl)-2-((((((2*R*,3*S*,5*R*)-5-(3-((benzyloxy)methyl)-5-methyl-2,4-dioxo-3,4-dihydropyrimidin-1(2*H*)-yl)-2-((trityloxy)methyl)tetrahydrofuran-3-yl)oxy)(ethoxy)phosphoryl)oxy)methyl)tetrahydrofuran-3-yl benzoate (**7a**)

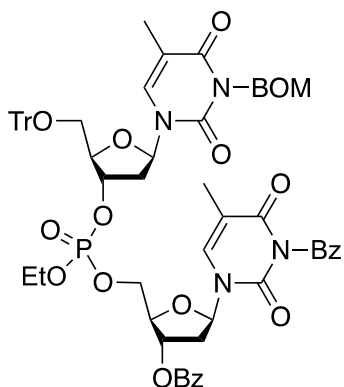

White solid, 150.8 mg (44%), *dr* = 56:44

<sup>1</sup>H NMR (600 MHz, CDCl<sub>3</sub>): δ 8.00 (2H for one diastereomer, d, *J* = 6.9 Hz), 7.99 (2H for the other diastereomer, d, *J* = 6.9 Hz), 7.94 (2H for one diastereomer, d, *J* = 6.9 Hz), 7.93 (2H for the other diastereomer, d, *J* = 6.9 Hz), 7.66-7.20 (28H, m), 6.52-6.43 (2H, m), 5.60-5.40 (3H, m), 5.25-5.18 (1H, m), 4.71 (2H for one diastereomer, s), 4.68 (2H for the other diastereomer, s), 4.49-4.07 (6H, m), 3.59-3.52 (1H, m), 3.46-3.39 (1H, m), 2.72-2.67 (2H, m), 2.64 (1H for one diastereomer, dd, *J* = 5.5, 14.4 Hz),

2.59 (1H for the other diastereomer, dd, *J* = 5.5, 14.4 Hz), 2.49-2.40 (1H, m), 2.40-2.29 (1H, m), 2.004 (3H for one diastereomer, s), 1.995 (3H for the other diastereomer, s), 1.45 (3H, s), 1.38 (3H for one diastereomer, t, *J* = 6.9 Hz), 1.30 (3H for the other diastereomer, t, *J* = 7.2 Hz); <sup>13</sup>C NMR (125 MHz, CDCl<sub>3</sub>): δ 168.65, 168.62, 165.8, 165.7, 163.13, 163.11, 162.44, 162.42, 150.8, 149.3, 149.2, 142.81, 142.80, 137.8, 134.9, 134.7, 133.72, 133.67, 133.6, 131.4, 130.3, 129.5, 129.0, 128.7, 128.6, 128.5, 128.4, 128.10, 128.09, 127.9, 127.5, 127.44, 127.42, 111.8, 111.6, 110.8, 110.7, 87.6, 84.9, 84.81, 84.80, 84.7, 84.4, 84.30, 84.29, 84.2, 82.9, 82.83, 82.80, 82.77, 78.83, 78.79, 78.73, 78.69, 77.3, 77.0, 76.7, 74.4, 72.02, 72.00, 70.4, 67.24, 67.21, 67.20, 67.17, 64.74, 64.69, 64.68, 64.6, 63.3, 63.2, 39.1, 39.03, 38.97, 38.9, 37.3, 37.0, 30.7, 16.1, 16.05, 16.01, 16.00, 12.4, 12.3; <sup>31</sup>P NMR (243 MHz, CDCl<sub>3</sub>): δ -1.19, -1.57; HRMS (ESI): *m/z* calcd. for C<sub>63</sub>H<sub>62</sub>N<sub>4</sub>O<sub>15</sub>P ([M+H]<sup>+</sup>): 1145.39493; found: 1145.39645; IR (neat): 2982, 2938, 1749, 1705, 1652, 1600, 1491, 1448, 1395, 1364, 1317, 1268, 1180, 1158, 1097, 1070, 1033, 1015, 904, 823, 773, 763, 747, 698, 633, 558, 487 cm<sup>-1</sup>.



*Tert*-butyl (1-((3*aR*,4*R*,6*R*,6*aR*)-6-((((((2*R*,3*S*,5*R*)-5-(3-((benzyloxy)methyl)-5-methyl-2,4-dioxo-3,4-dihydropyrimidin-1(2*H*)-yl)-2-((trityloxy)methyl)tetrahydrofuran-3-yl)oxy)(ethoxy)phosphoryl)oxy)methyl)-2,2-dimethyltetrahydrofuro[3,4-*d*][1,3]dioxol-4-yl)-2-oxo-1,2-dihydropyrimidin-4-yl)(*tert*-butoxycarbonyl)carbamate (**7b**)

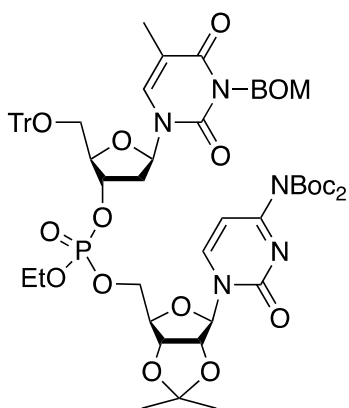

White solid, 136.7 mg (37%), *dr* = 61:39

<sup>1</sup>H NMR (500 MHz, CDCl<sub>3</sub>): δ 7.55 (1H for one diastereomer, d, *J* = 7.9 Hz), 7.53 (1H for one diastereomer, d, *J* = 6.4 Hz), 7.52 (1H for the other diastereomer, d, *J* = 6.9 Hz), 7.42-7.36 (9H, m), 7.35-7.22 (12H, m), 7.04 (1H for one diastereomer, d, *J* = 7.3 Hz), 6.99 (1H for the other diastereomer, d, *J* = 7.3 Hz), 6.47-6.40 (1H, m), 5.57 (1H for one diastereomer, s), 5.52 (1H for the other diastereomer, s), 5.49 (2H, s), 5.19-5.06 (2H, m), 4.91 (1H for one diastereomer, d, *J* = 6.4, 4.1 Hz), 4.87 (1H for the other diastereomer, d, *J* = 6.4, 4.1 Hz), 4.71 (2H, s), 4.43-4.23

(4H, m), 4.14-3.98 (4H, m), 3.52-3.43 (1H, m), 3.43-3.35 (1H, m), 2.71-2.58 (1H, m), 2.42-2.32 (1H, m), 1.55 (21H, s), 1.45-1.20 (9H, m); <sup>13</sup>C NMR (125 MHz, CDCl<sub>3</sub>): δ 163.4, 162.95, 162.92, 153.80, 153.77, 150.9, 149.28, 149.27, 146.5, 146.4, 143.1, 143.0, 138.0, 134.0, 128.6, 128.3, 128.0, 127.65, 127.58, 127.5, 114.11, 114.09, 110.74, 110.70, 97.8, 97.7, 96.15, 96.09, 87.6, 87.5, 87.4, 85.18, 85.16, 85.01, 84.97, 84.70, 84.66, 84.42, 84.38, 81.48, 81.45, 78.31, 78.26, 78.2, 78.1, 77.2, 72.2, 70.5, 69.5, 67.84, 67.79, 67.7, 64.61, 64.56, 64.5, 64.4, 63.3, 53.7, 39.3, 39.24, 39.16, 39.1, 31.7, 30.9, 29.2, 27.8, 27.6, 27.0, 25.12, 25.10, 16.07, 16.06, 16.02, 16.00, 12.38, 12.36; <sup>31</sup>P NMR (202 MHz, CDCl<sub>3</sub>): δ -1.44, -1.62; HRMS (ESI): *m/z* calcd. for C<sub>61</sub>H<sub>73</sub>N<sub>5</sub>O<sub>17</sub>P ([M+H]<sup>+</sup>): 1178.47390; found: 1178.47235; IR (neat): 2026, 2856, 1779, 1744, 1711, 1527, 1491, 1450, 1371, 1321, 1261, 1212, 1157, 1127, 1093, 1067, 1023, 963, 858, 788, 773, 747, 700, 633, 567, 513 cm<sup>-1</sup>.

# <sup>1</sup>H NMR (600 MHz, DMSO-d<sub>6</sub>) of **3b**

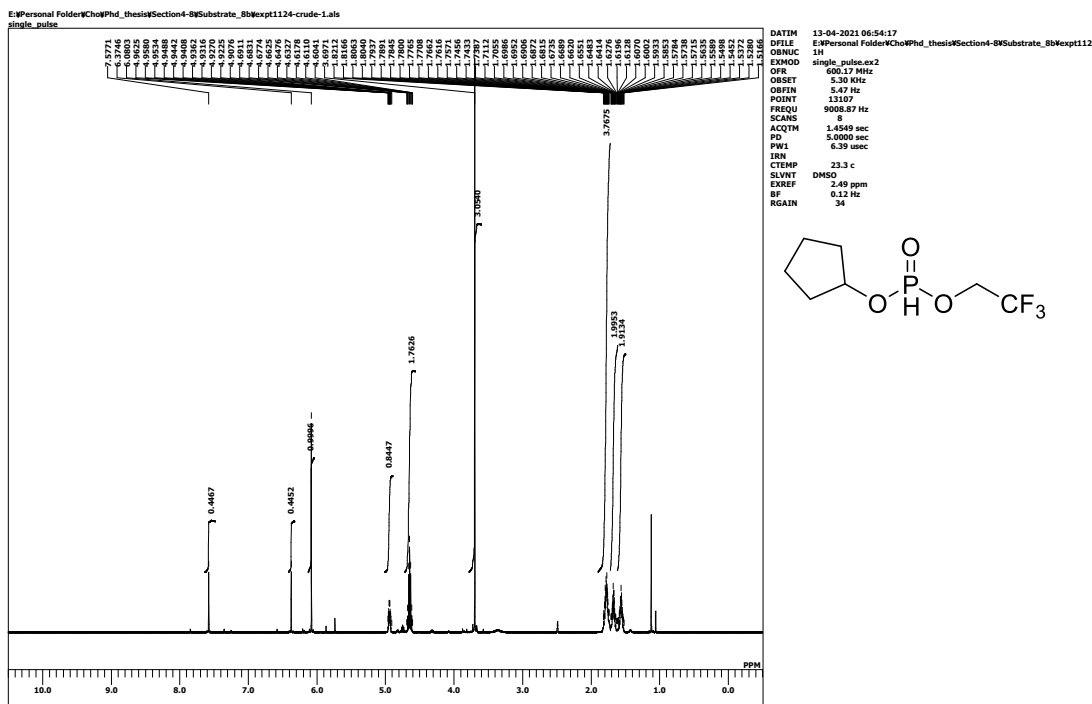

# <sup>13</sup>C NMR (150 MHz, DMSO-d<sub>6</sub>) of **3b**

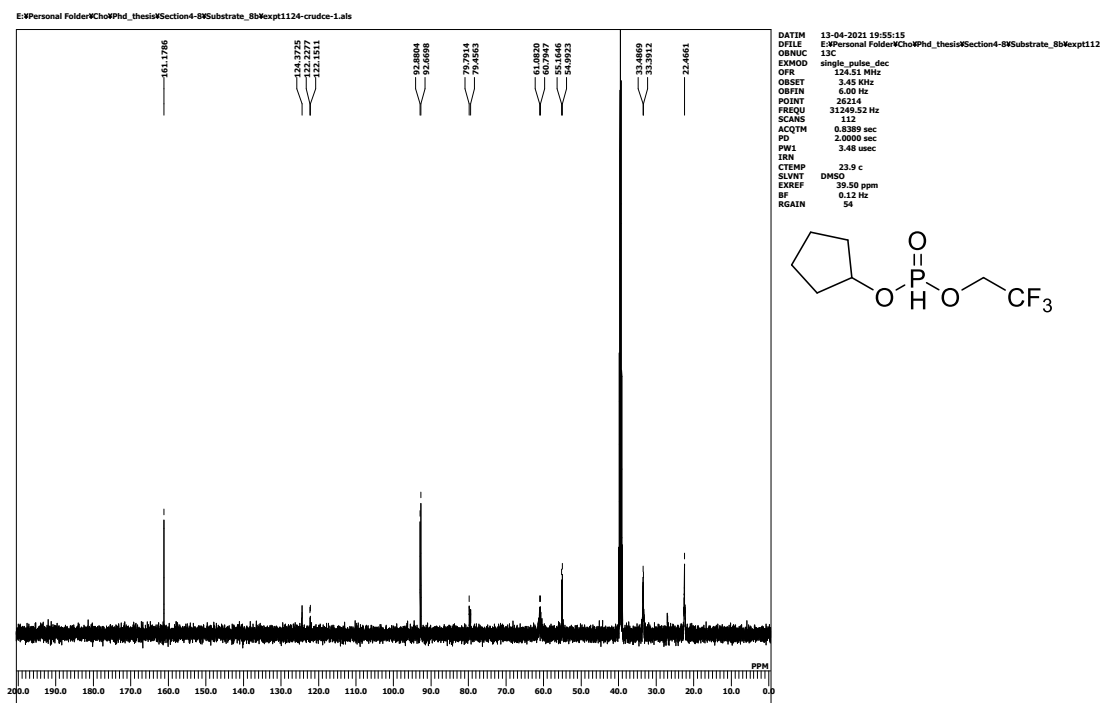

$^{31}\text{P}$  NMR (243 MHz,  $\text{DMSO-}d_6$ ) of **3b**

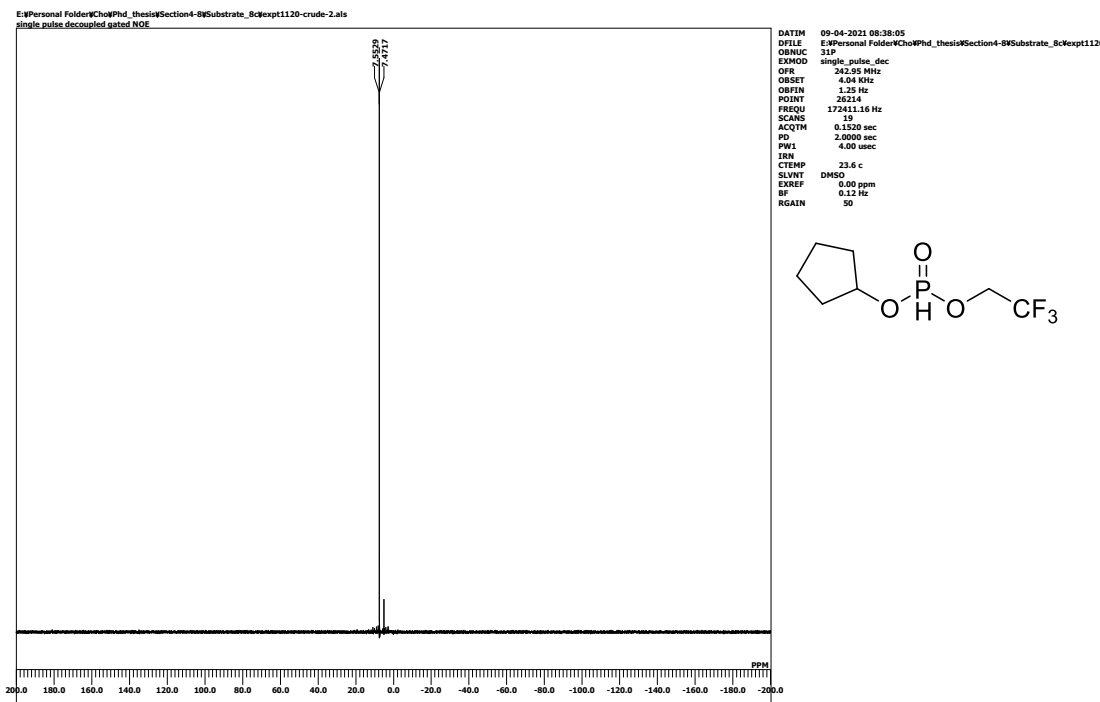

$^{19}\text{F}$  NMR (565 MHz,  $\text{DMSO-}d_6$ ) of **3b**

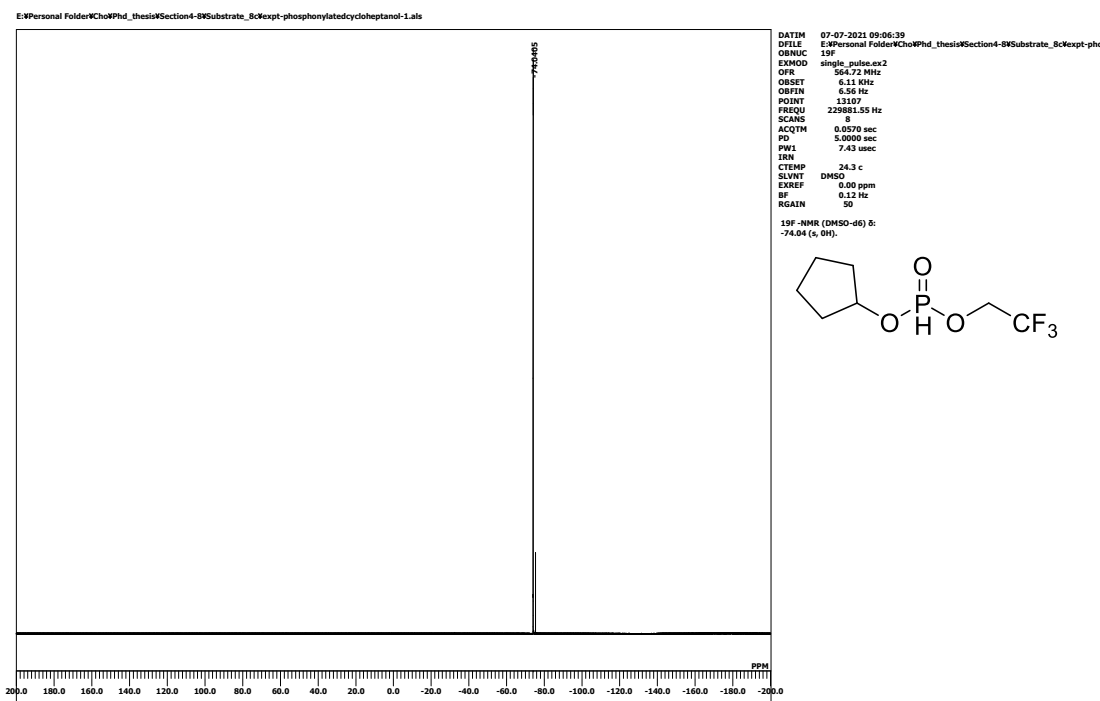

<sup>1</sup>H NMR (500 MHz, DMSO-d<sub>6</sub>) of **3c**

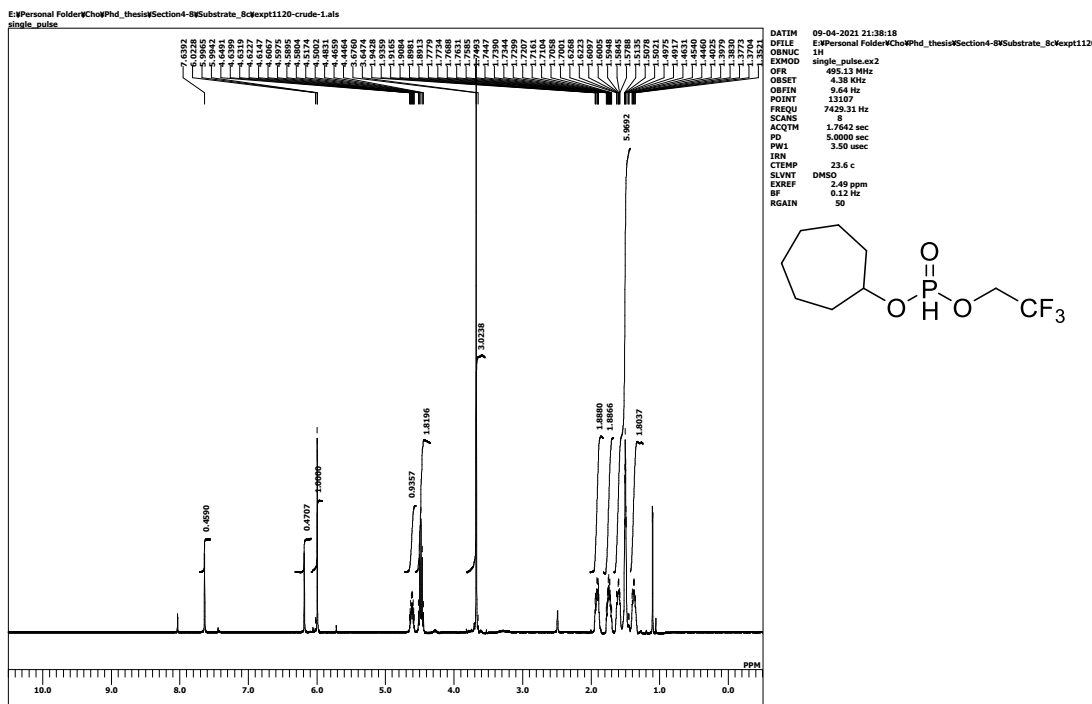

<sup>13</sup>C NMR (151 MHz, DMSO-d<sub>6</sub>) of **3c**

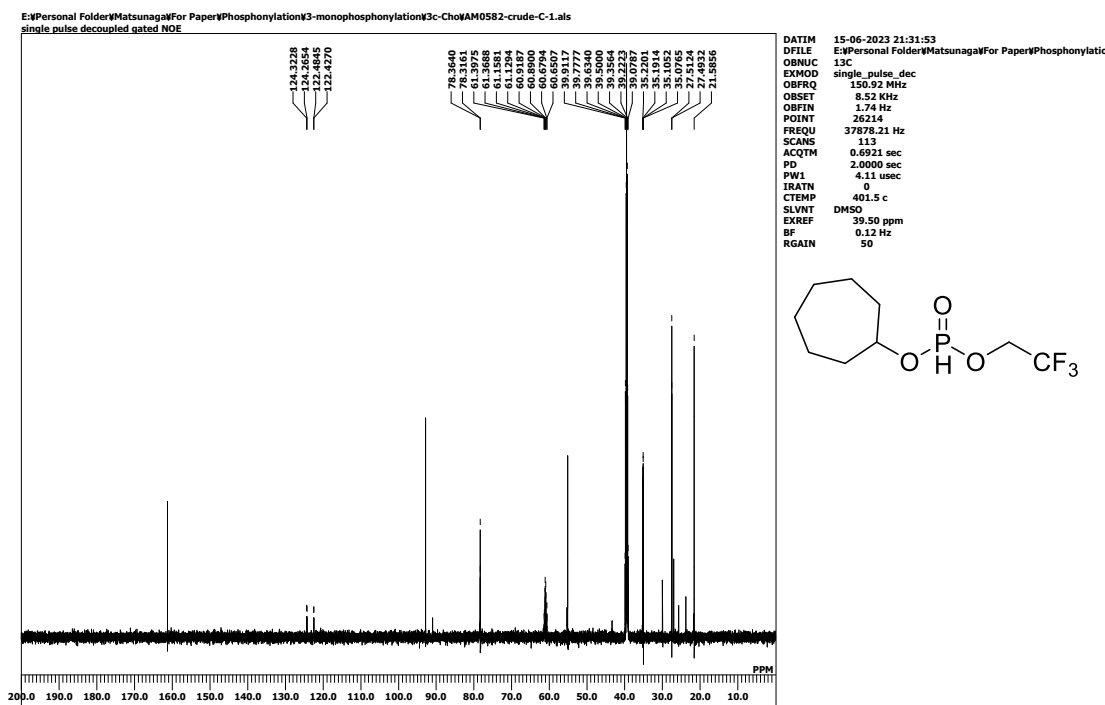

### <sup>31</sup>P NMR (243 MHz, DMSO-*d*<sub>6</sub>) of **3c**

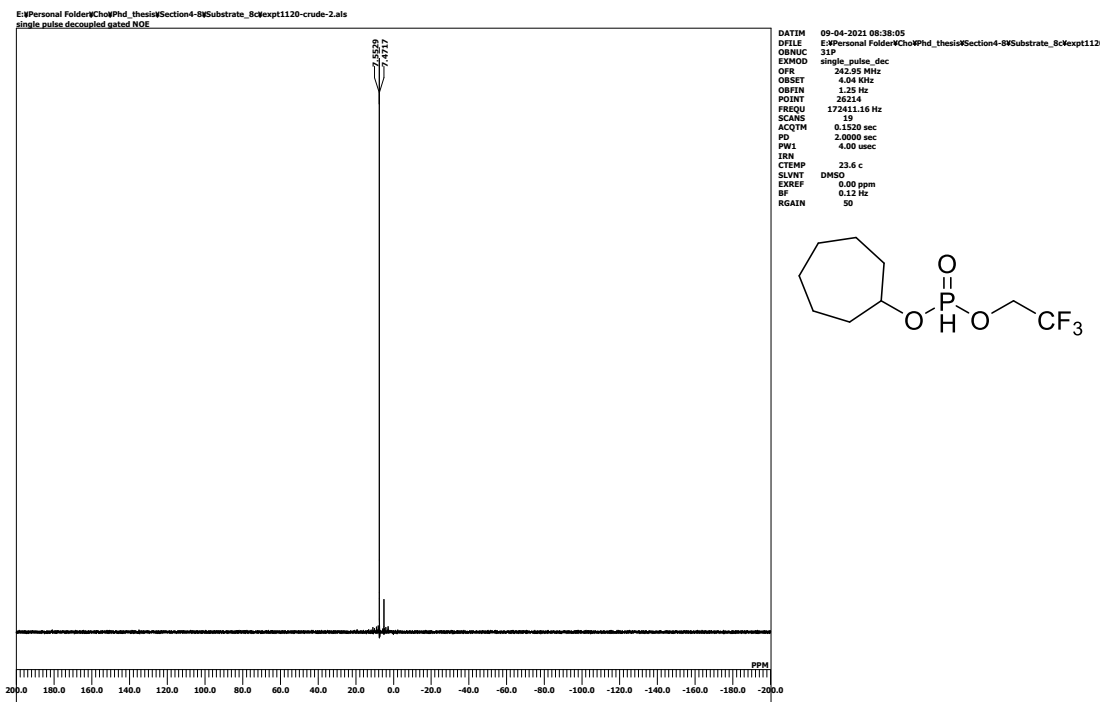

### <sup>19</sup>F NMR (565 MHz, DMSO-*d*<sub>6</sub>) of **3c**

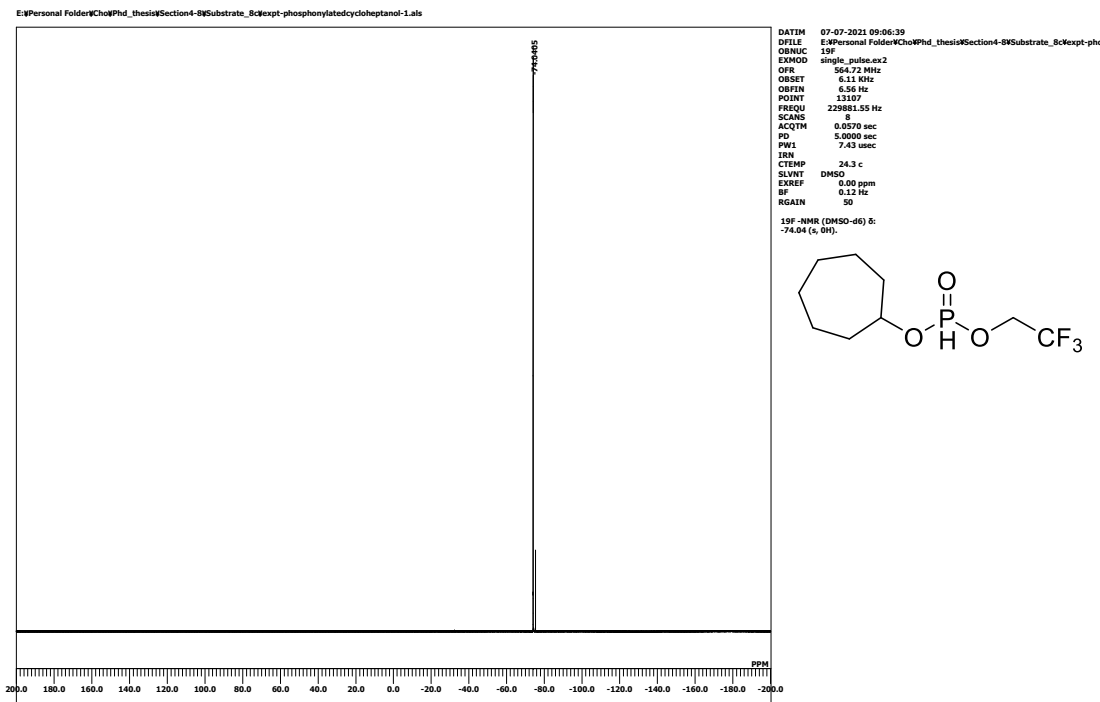

# <sup>1</sup>H NMR (600 MHz, DMSO-d<sub>6</sub>) of 3d

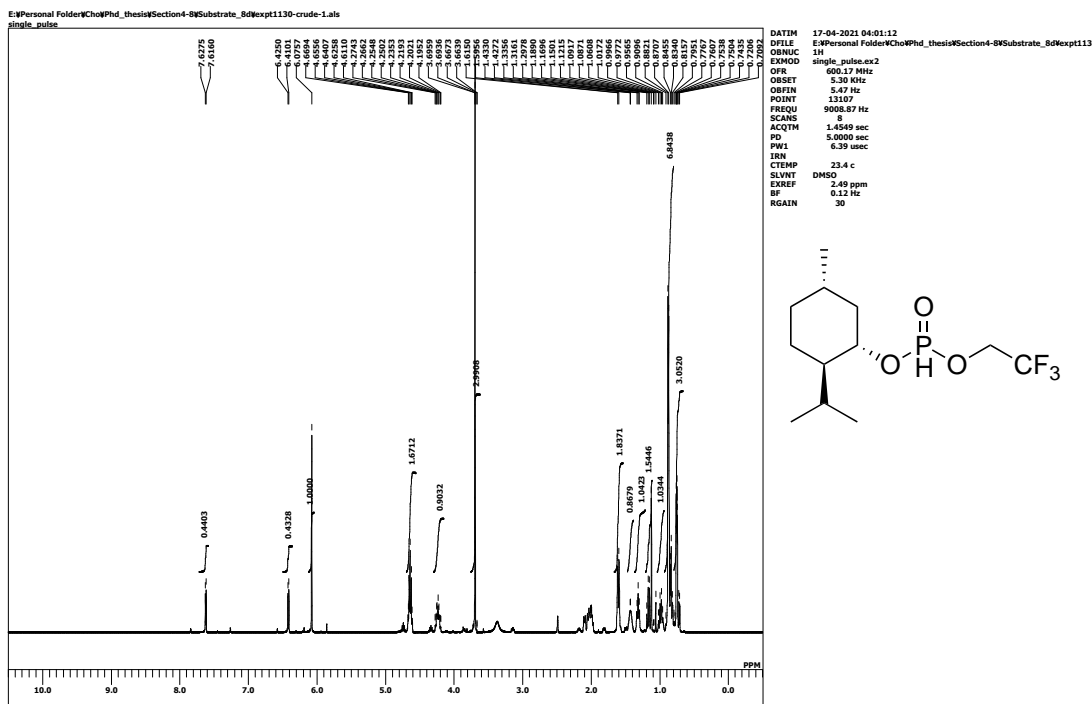

# <sup>13</sup>C NMR (151 MHz, DMSO-d<sub>6</sub>) of 3d

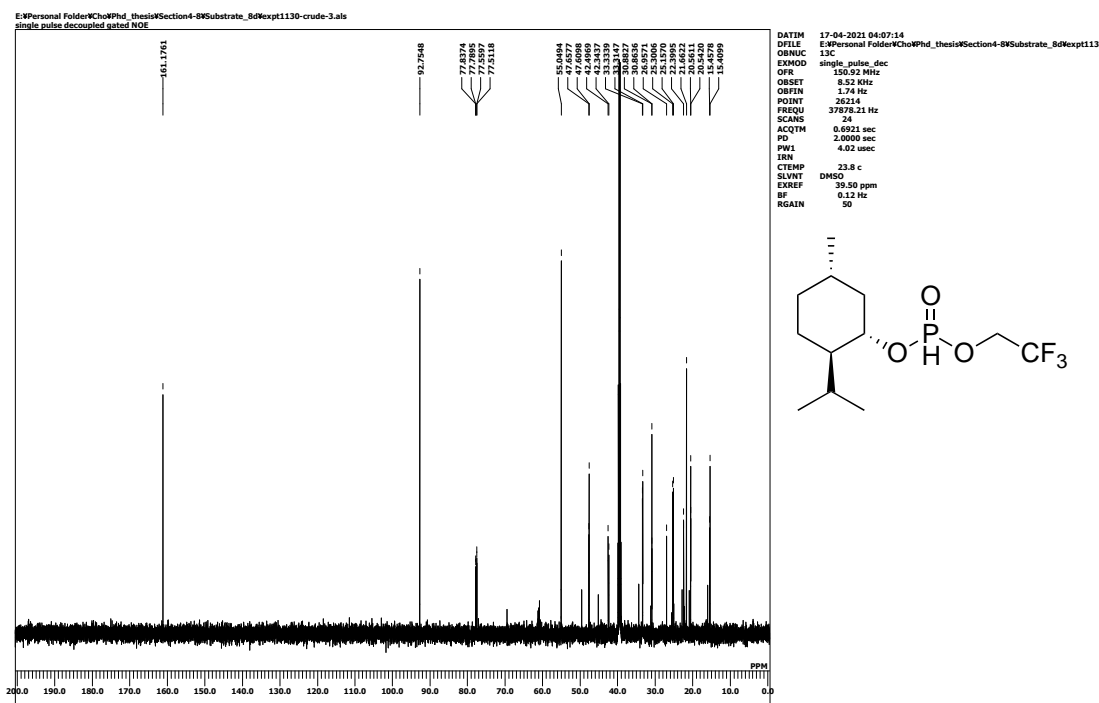

<sup>31</sup>P NMR (243 MHz, DMSO-*d*<sub>6</sub>) of **3d**

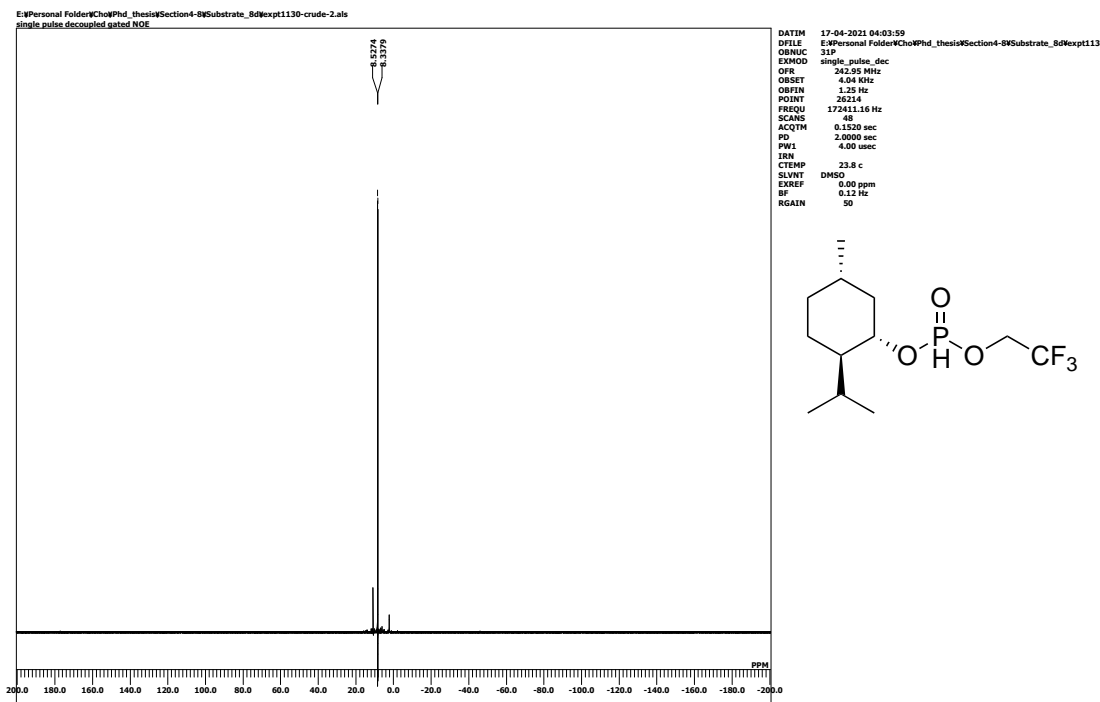

<sup>19</sup>F NMR (565 MHz, DMSO-*d*<sub>6</sub>) of **3d**

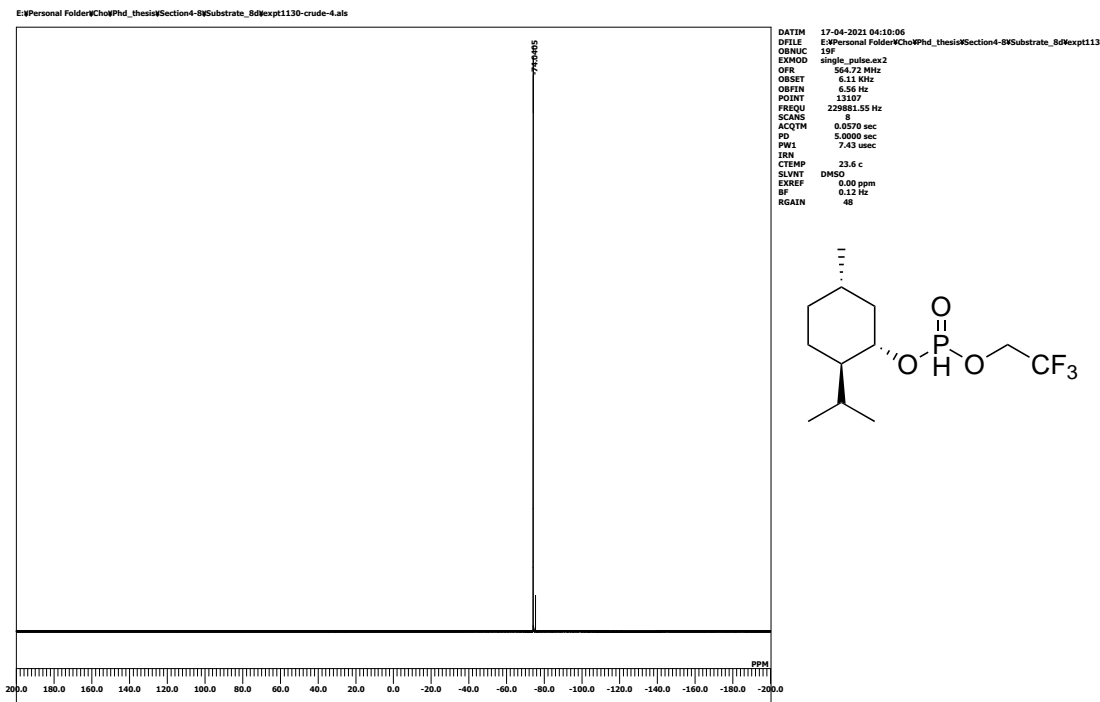

# <sup>1</sup>H NMR (600 MHz, DMSO-d<sub>6</sub>) of **3e**

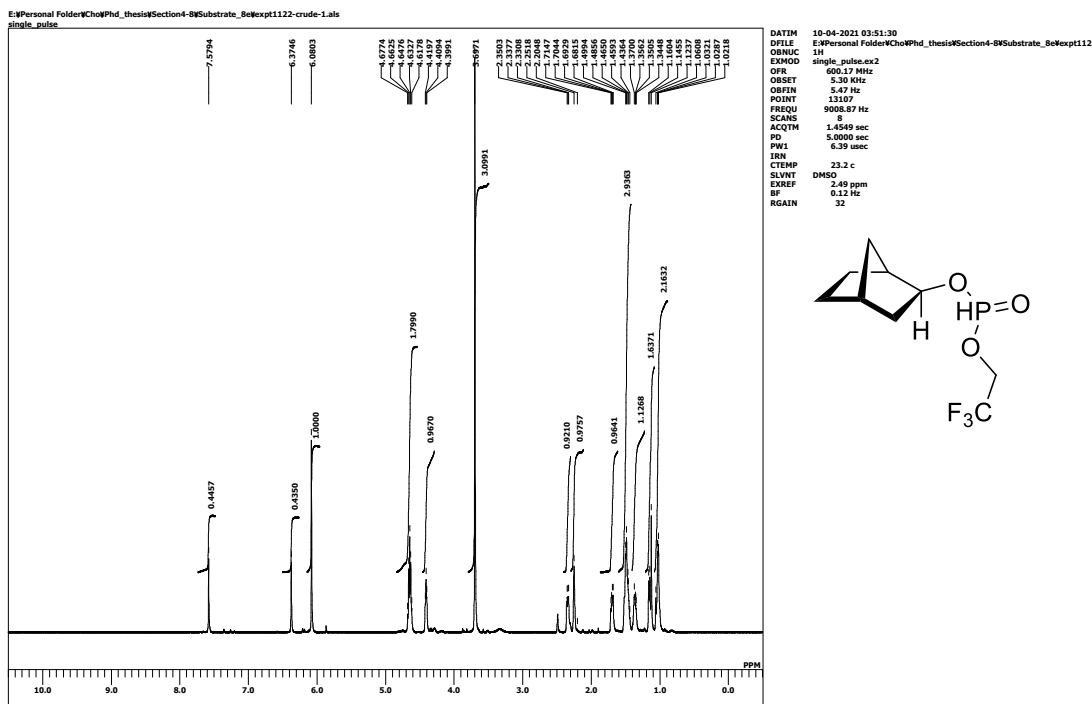

# <sup>13</sup>C NMR (151 MHz, DMSO-d<sub>6</sub>) of **3e**

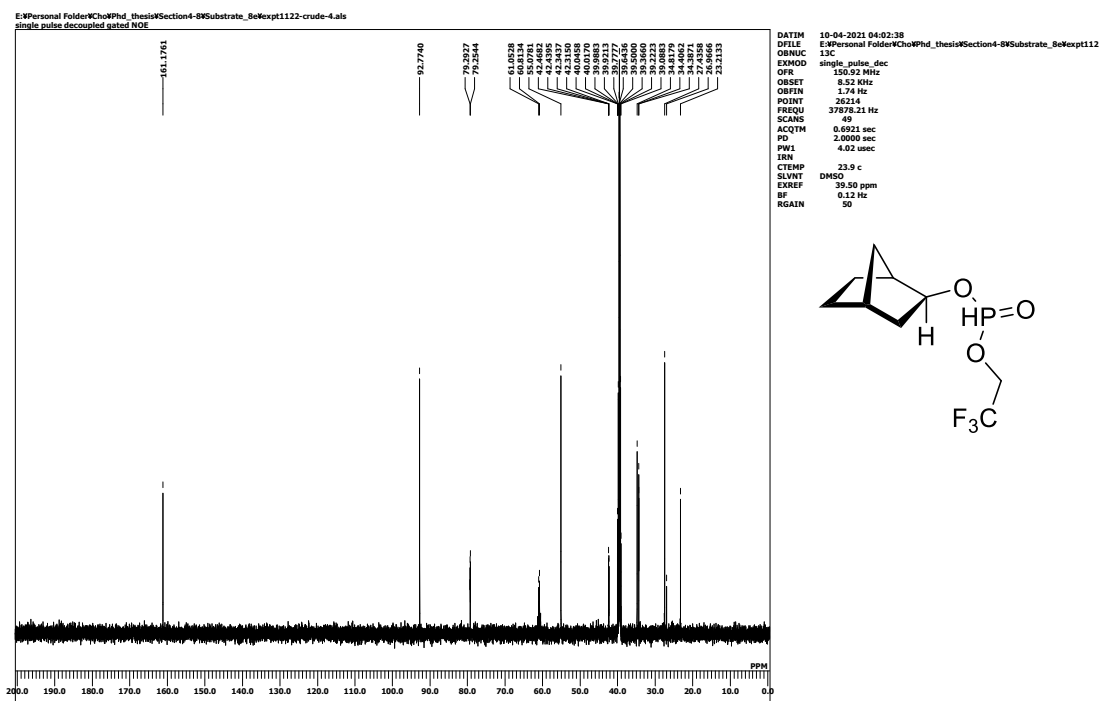



$^{31}\text{P}$  NMR (243 MHz,  $\text{DMSO-}d_6$ ) of **3e**

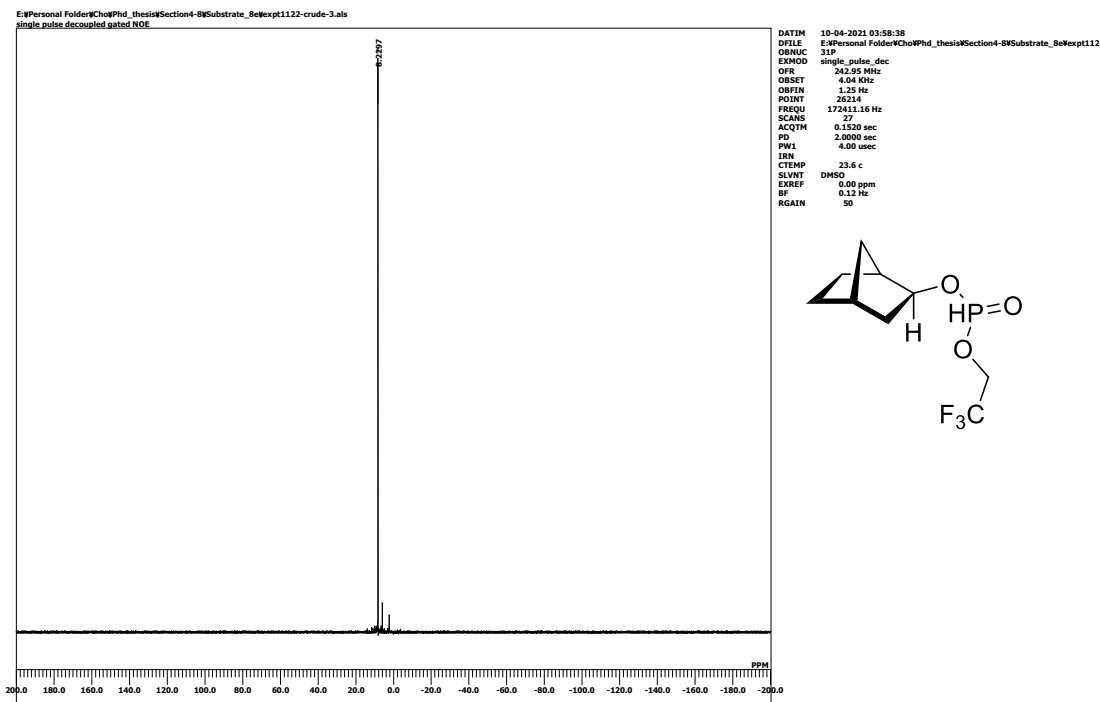

$^{19}\text{F}$  NMR (565 MHz,  $\text{DMSO-}d_6$ ) of **3e**

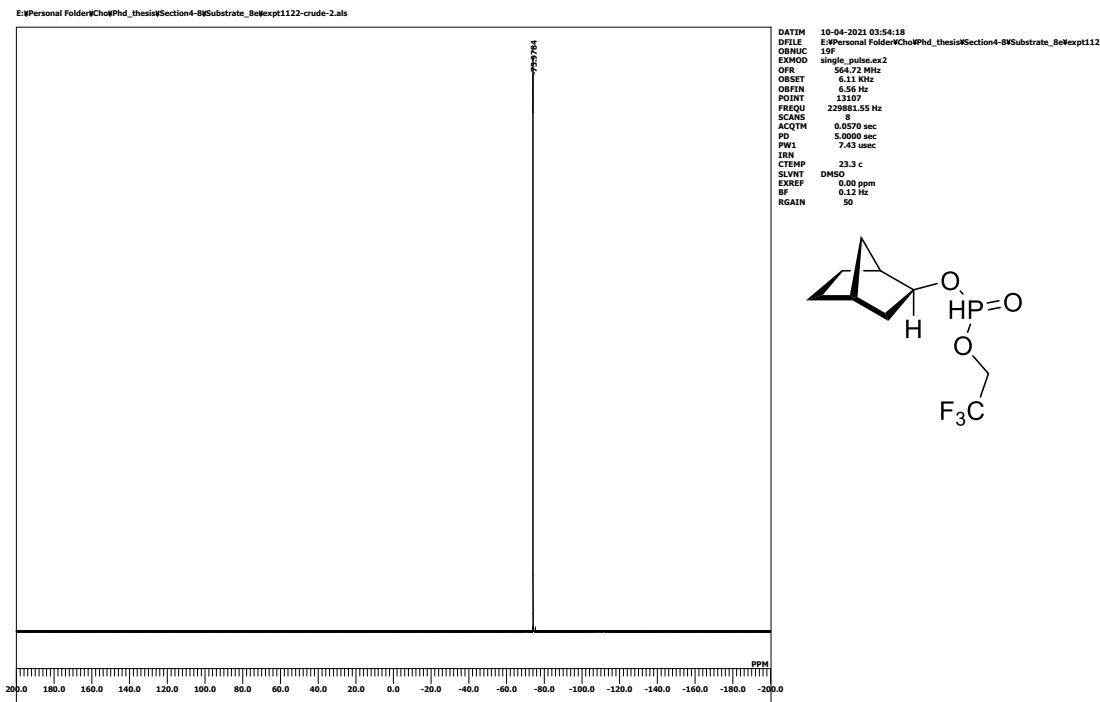



$^{31}\text{P}$  NMR (243 MHz,  $\text{DMSO-}d_6$ ) of **3f**

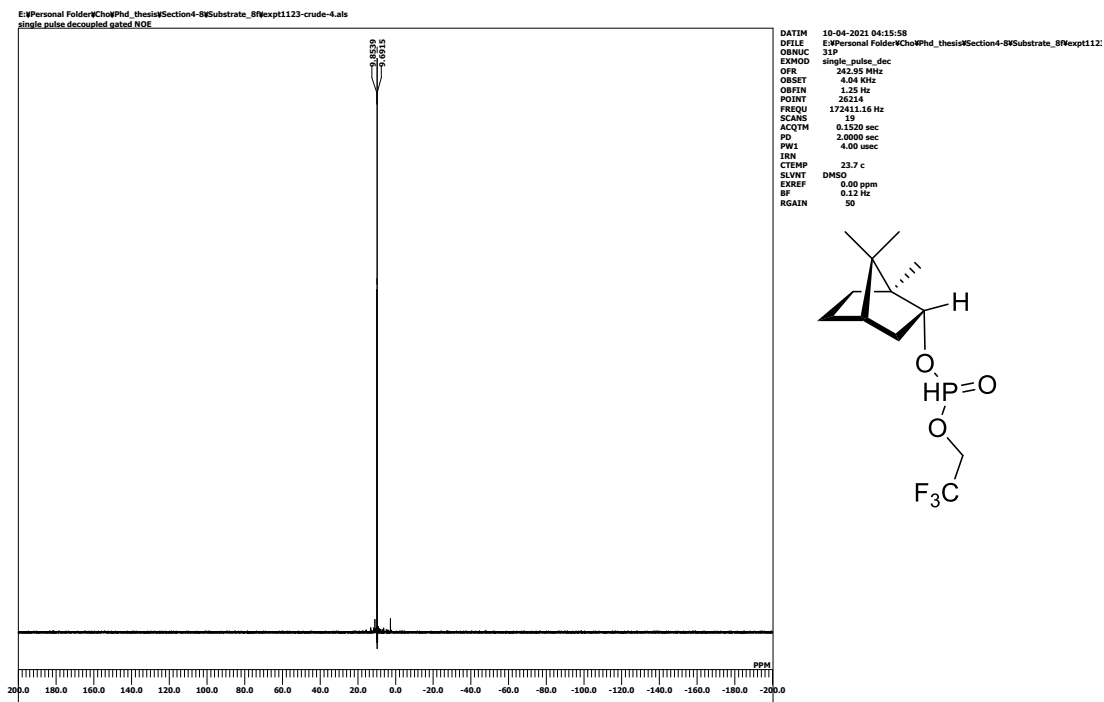

$^{19}\text{F}$  NMR (565 MHz,  $\text{DMSO-}d_6$ ) of **3f**

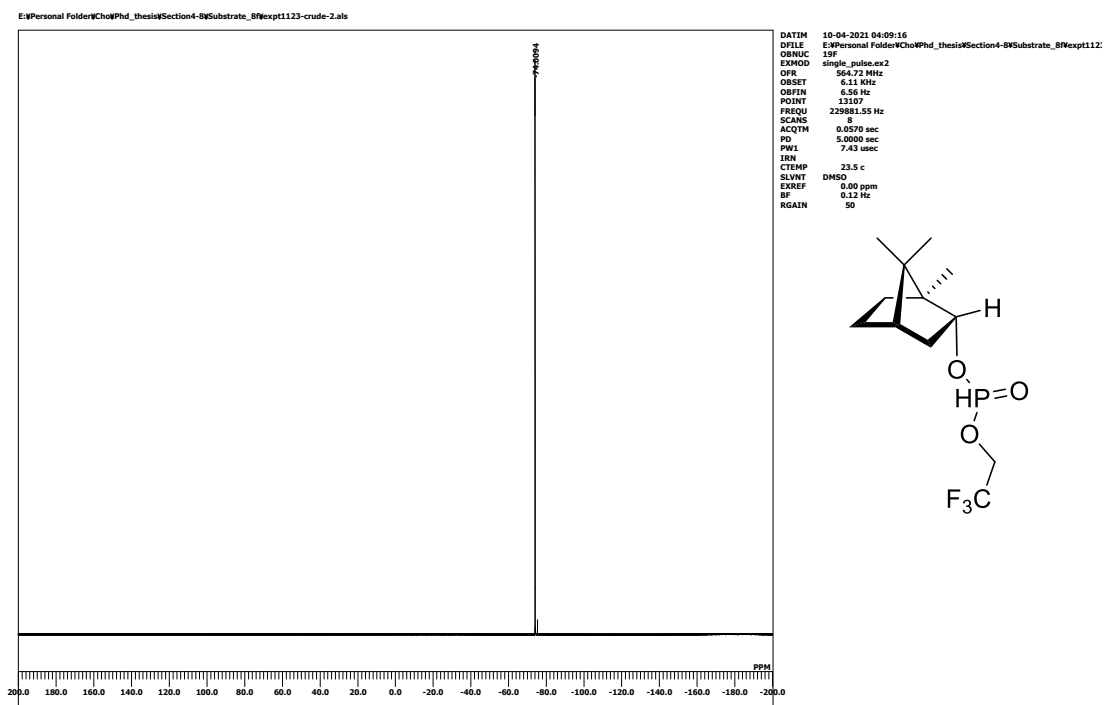



<sup>31</sup>P NMR (243 MHz, DMSO-*d*<sub>6</sub>) of **3g**

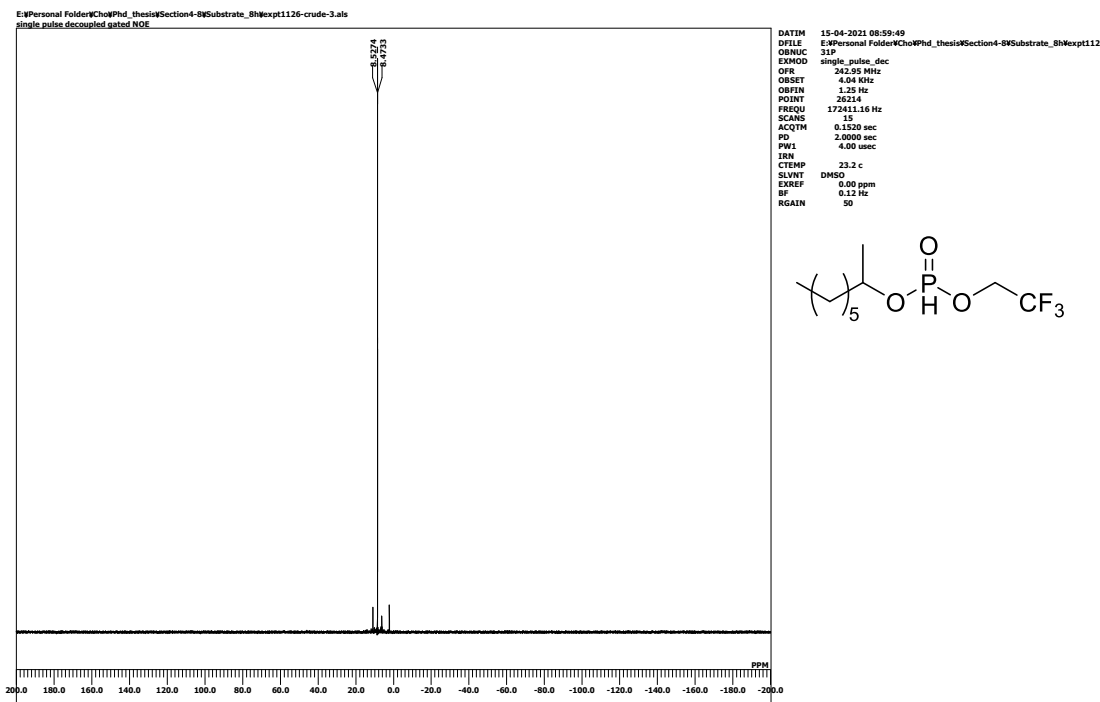

<sup>19</sup>F NMR (565 MHz, DMSO-*d*<sub>6</sub>) of **3g**

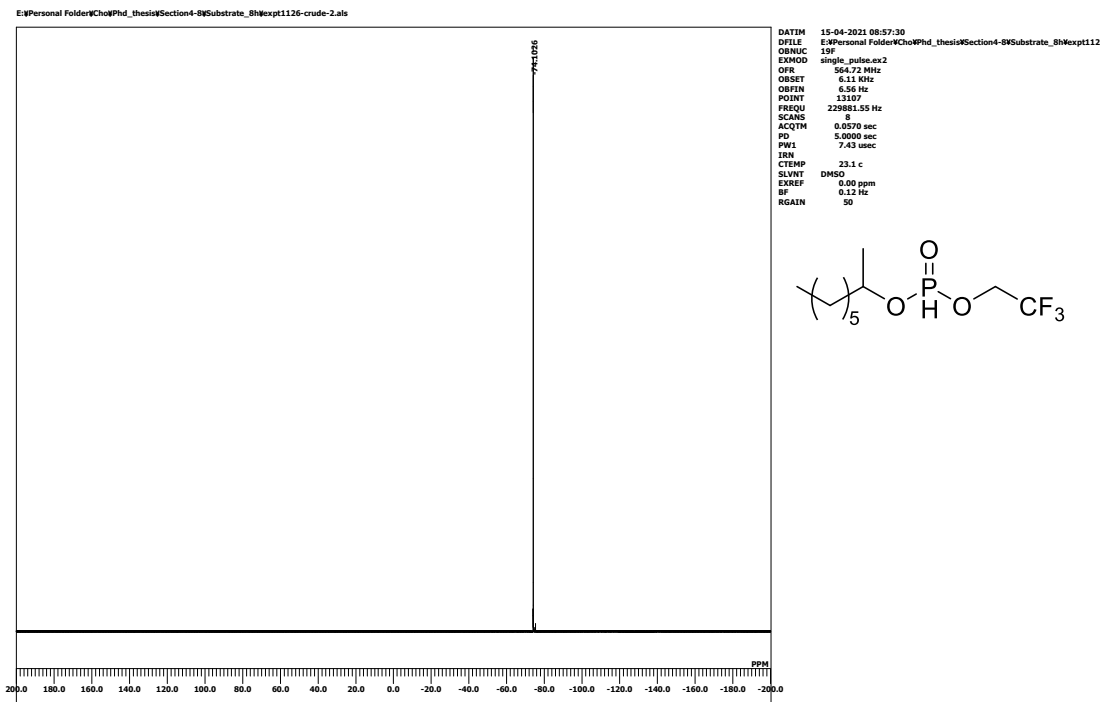

# <sup>1</sup>H NMR (600 MHz, DMSO-d<sub>6</sub>) of 3h

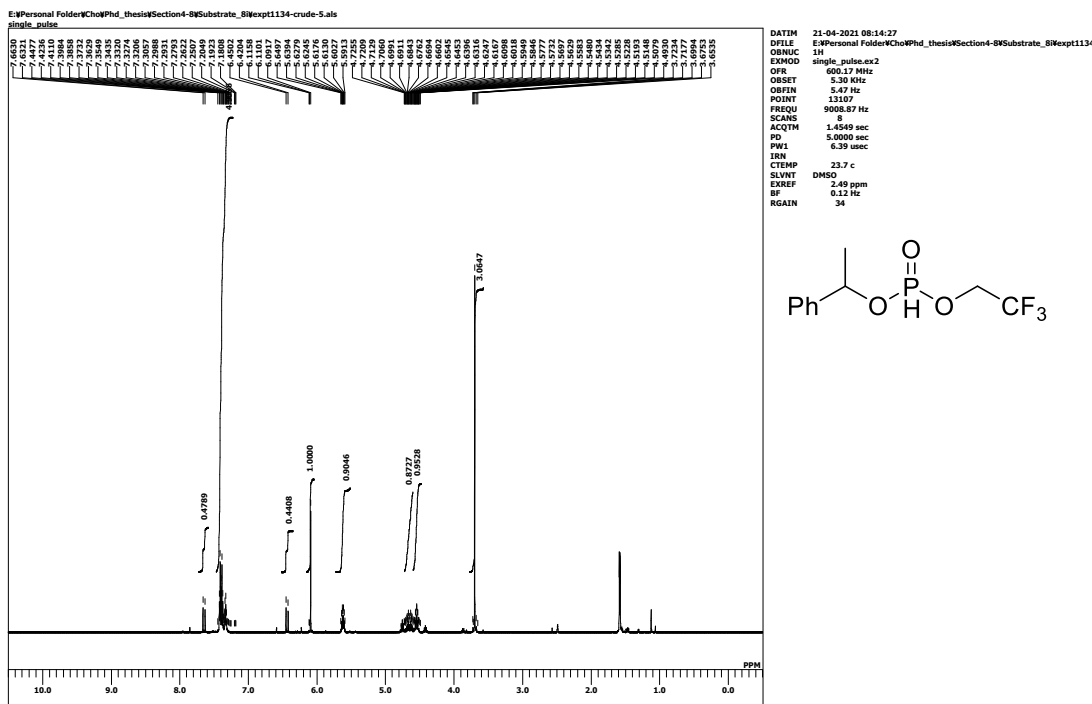

# <sup>13</sup>C NMR (151 MHz, DMSO-d<sub>6</sub>) of 3h

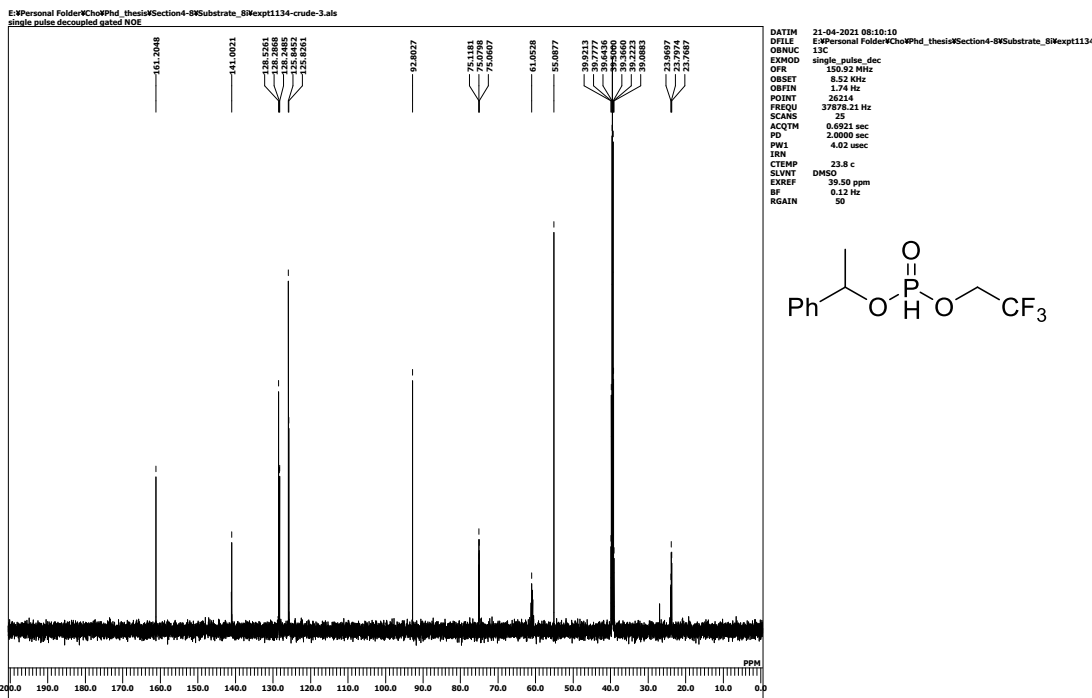

$^{31}\text{P}$  NMR (243 MHz,  $\text{DMSO-}d_6$ ) of **3h**

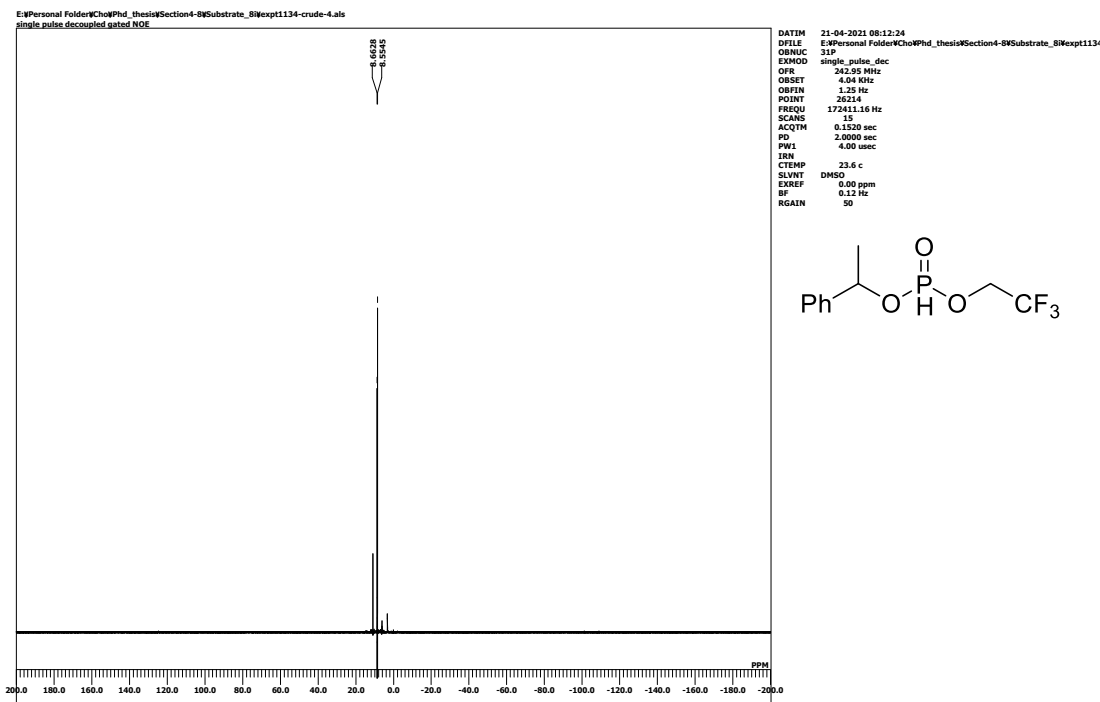

$^{19}\text{F}$  NMR (565 MHz,  $\text{DMSO-}d_6$ ) of **3h**

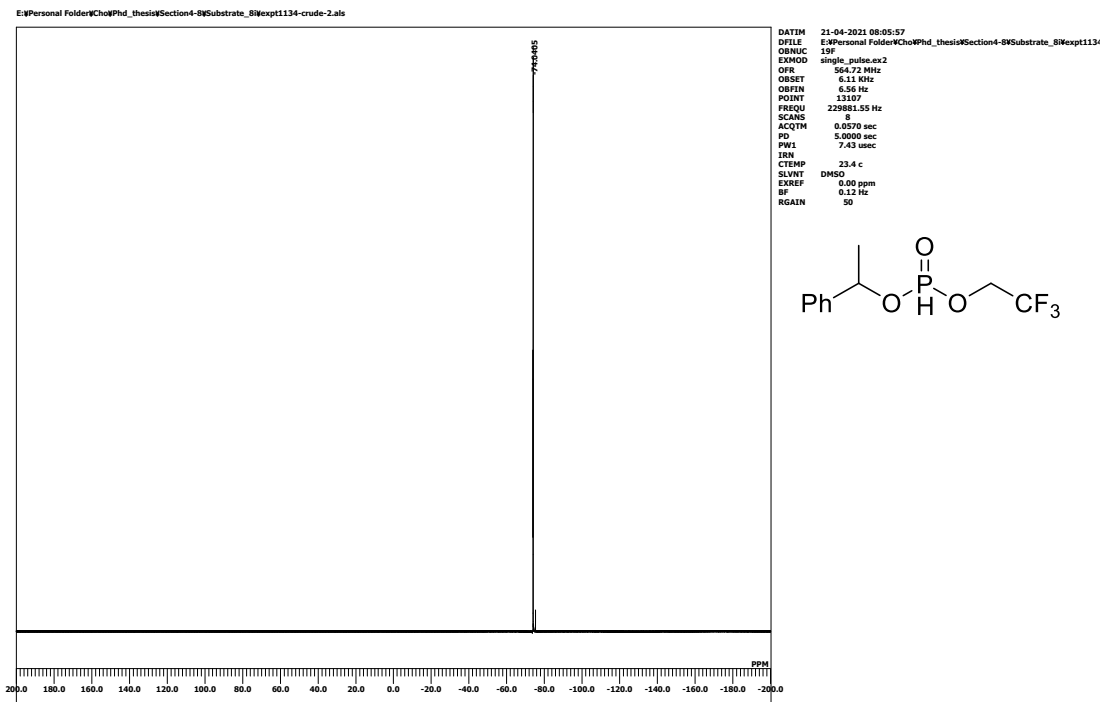





### $^{31}\text{P}$ NMR (243 MHz, $\text{DMSO-}d_6$ ) of **3i**

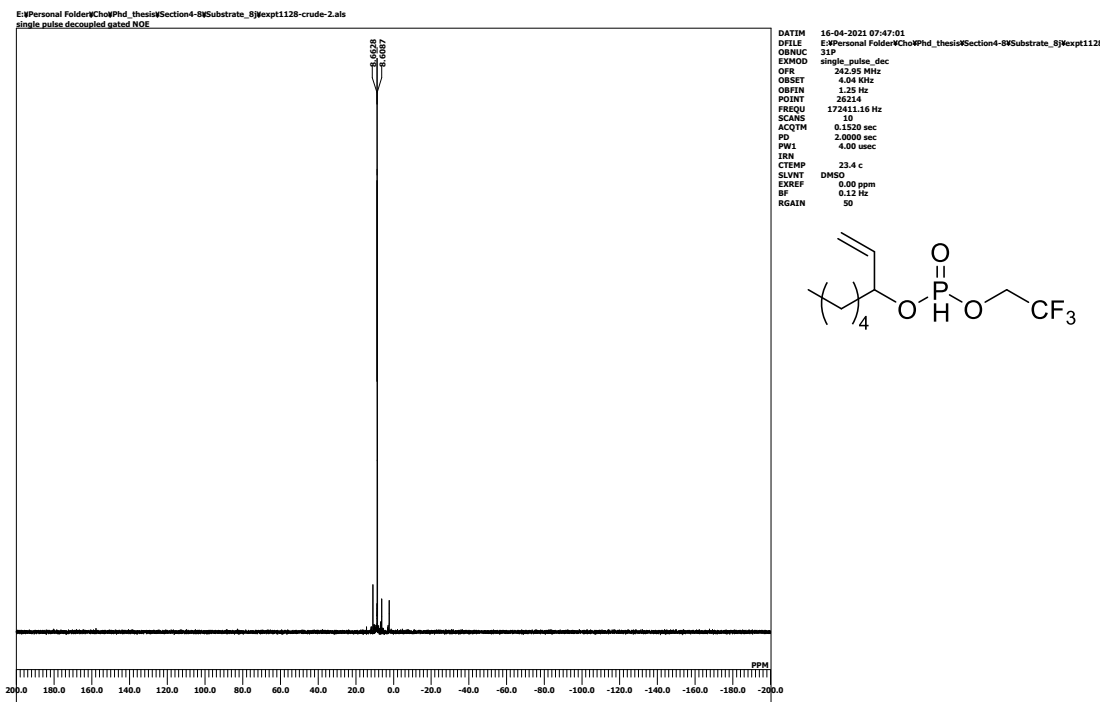

### $^{19}\text{F}$ NMR (565 MHz, $\text{DMSO-}d_6$ ) of **3i**

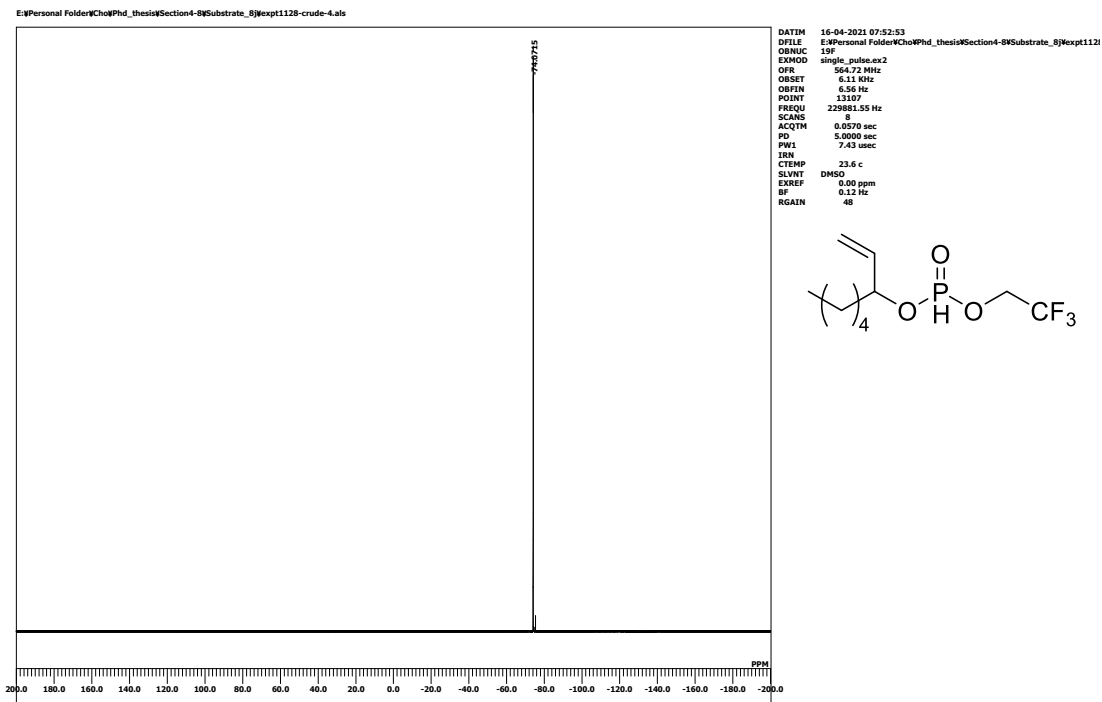

<sup>1</sup>H NMR (600 MHz, DMSO-d<sub>6</sub>) of **3j**

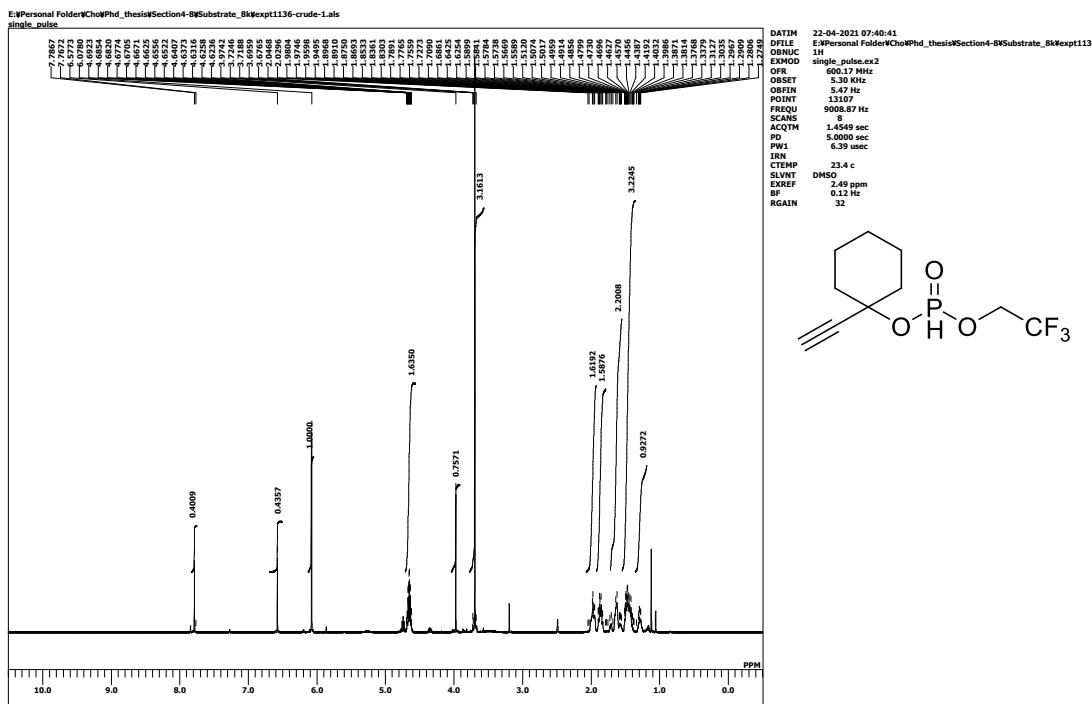

<sup>13</sup>C NMR (151 MHz, DMSO-d<sub>6</sub>) of **3j**

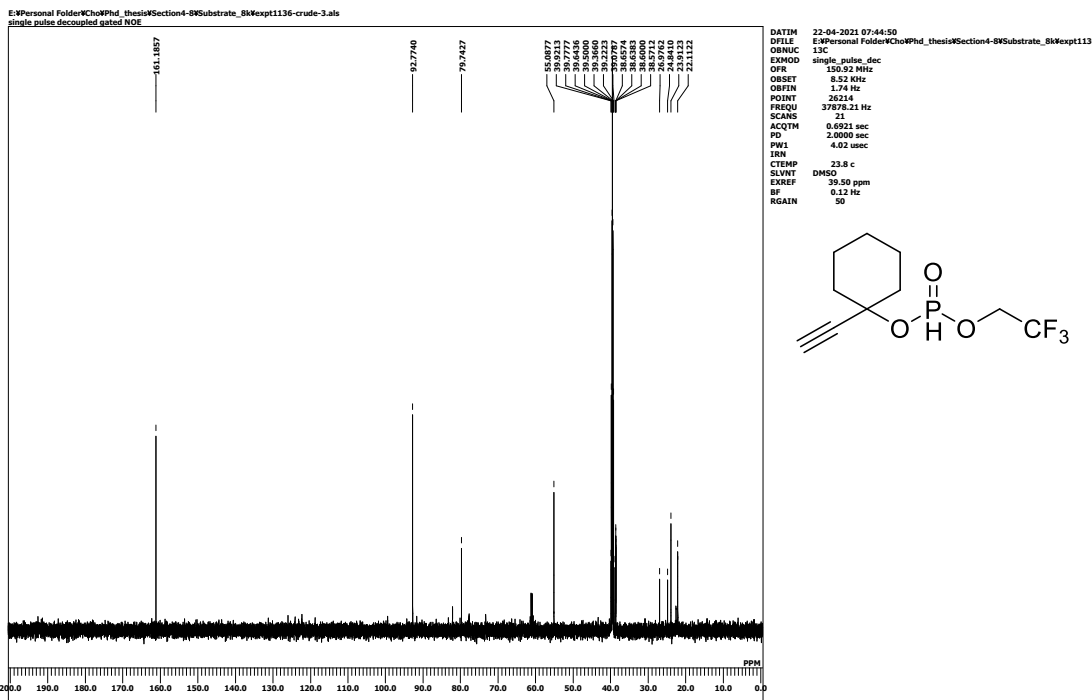

$^{31}\text{P}$  NMR (243 MHz,  $\text{DMSO-}d_6$ ) of **3j**

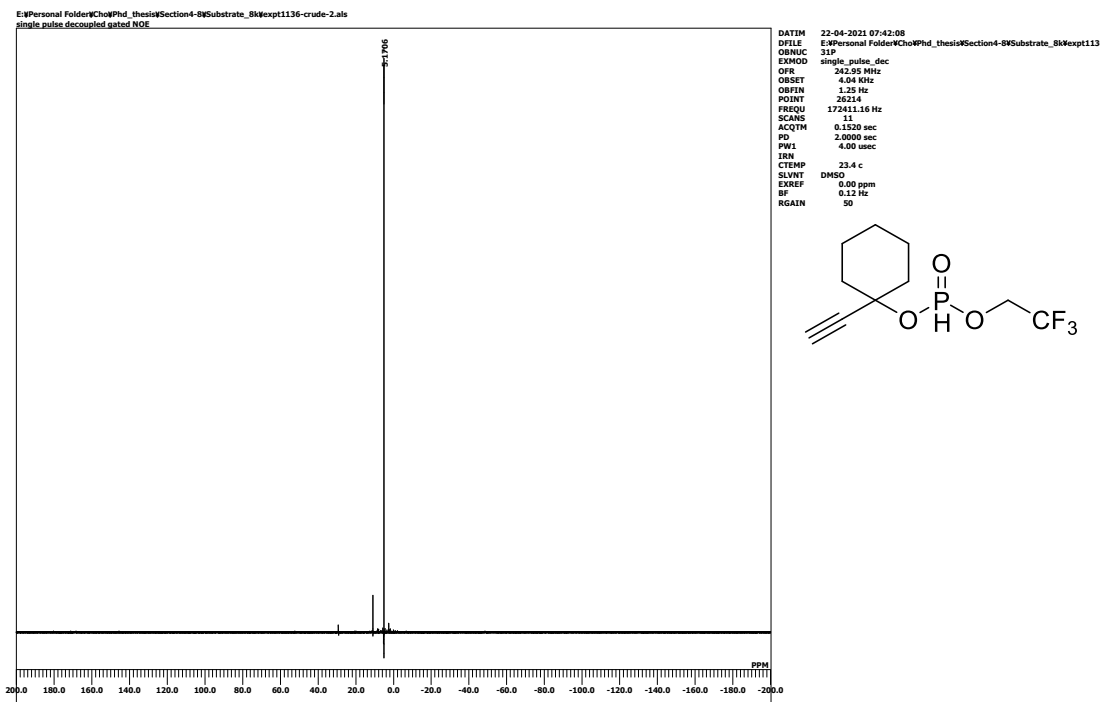

$^{19}\text{F}$  NMR (565 MHz,  $\text{DMSO-}d_6$ ) of **3j**

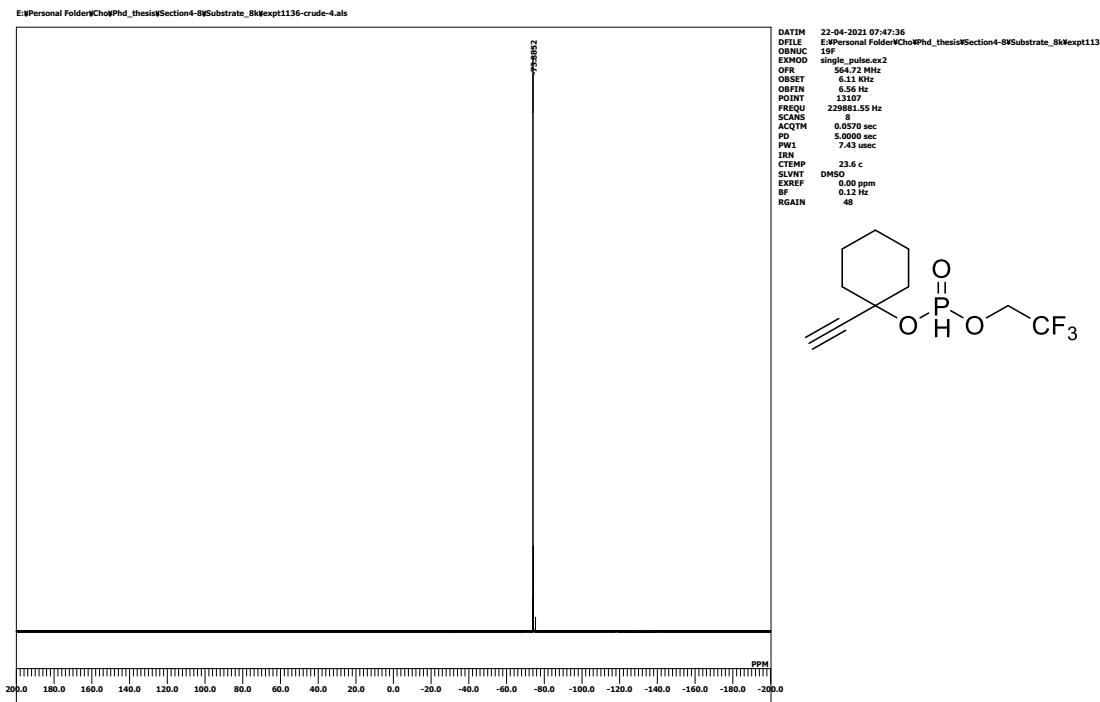

<sup>1</sup>H NMR (600 MHz, DMSO-d<sub>6</sub>) of **3k**

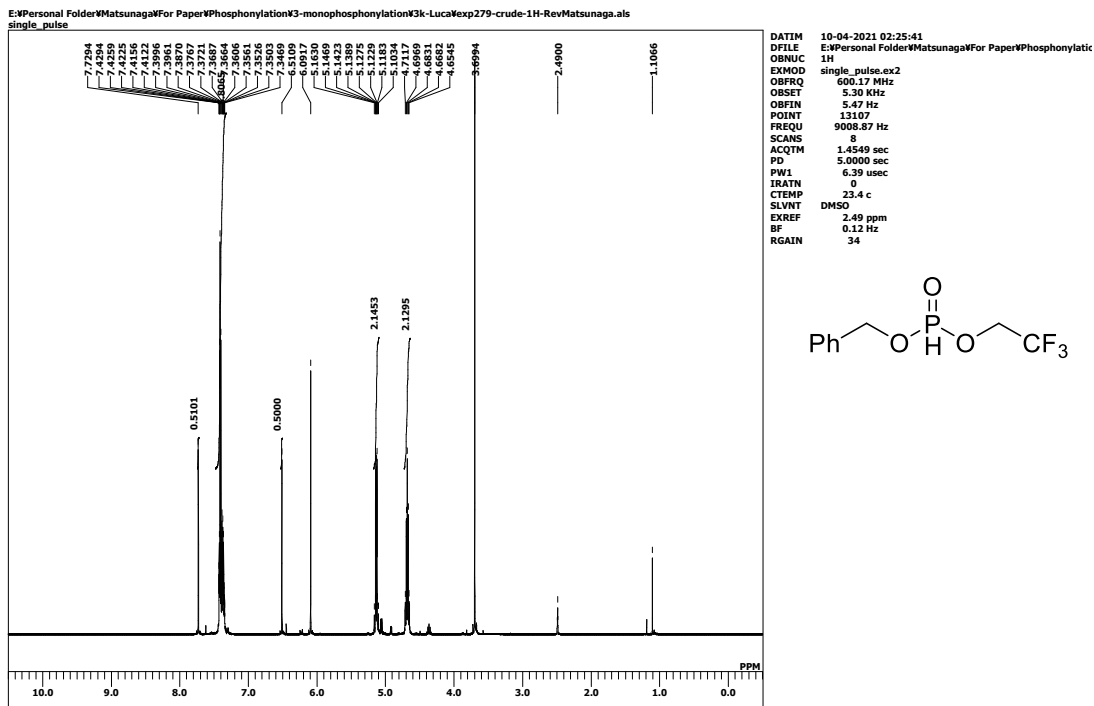

<sup>13</sup>C NMR (151 MHz, DMSO-d<sub>6</sub>) of **3k**

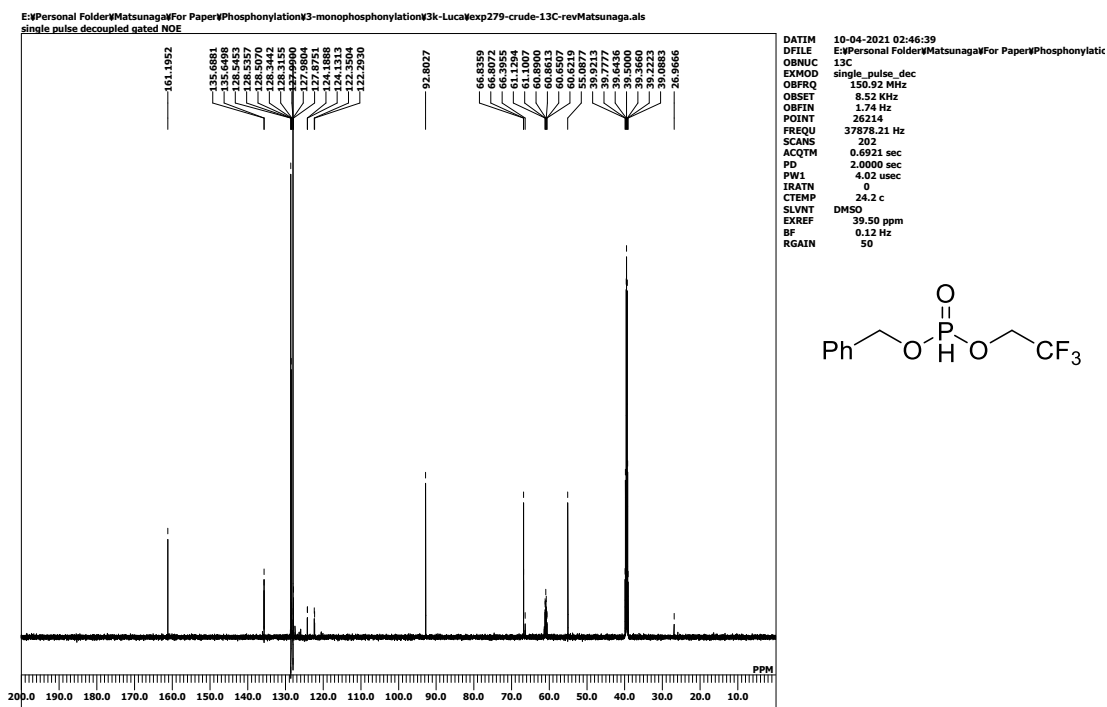

$^{31}\text{P}$  NMR (243 MHz,  $\text{DMSO-}d_6$ ) of **3k**

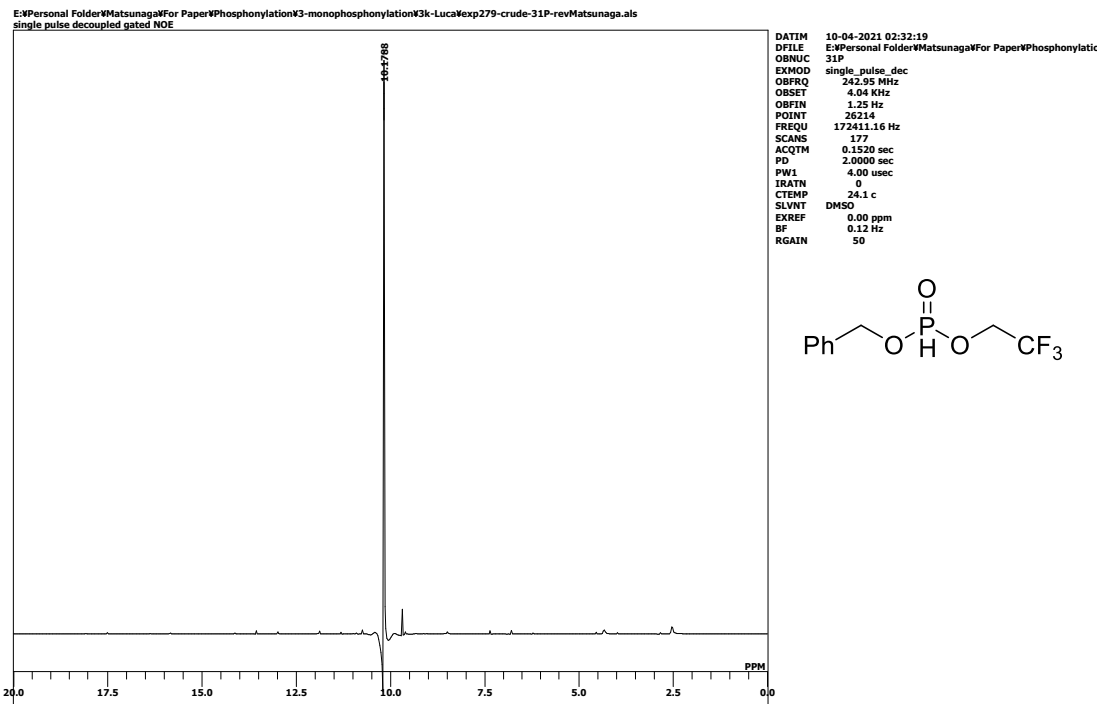

$^{19}\text{F}$  NMR (565 MHz,  $\text{DMSO-}d_6$ ) of **3k**

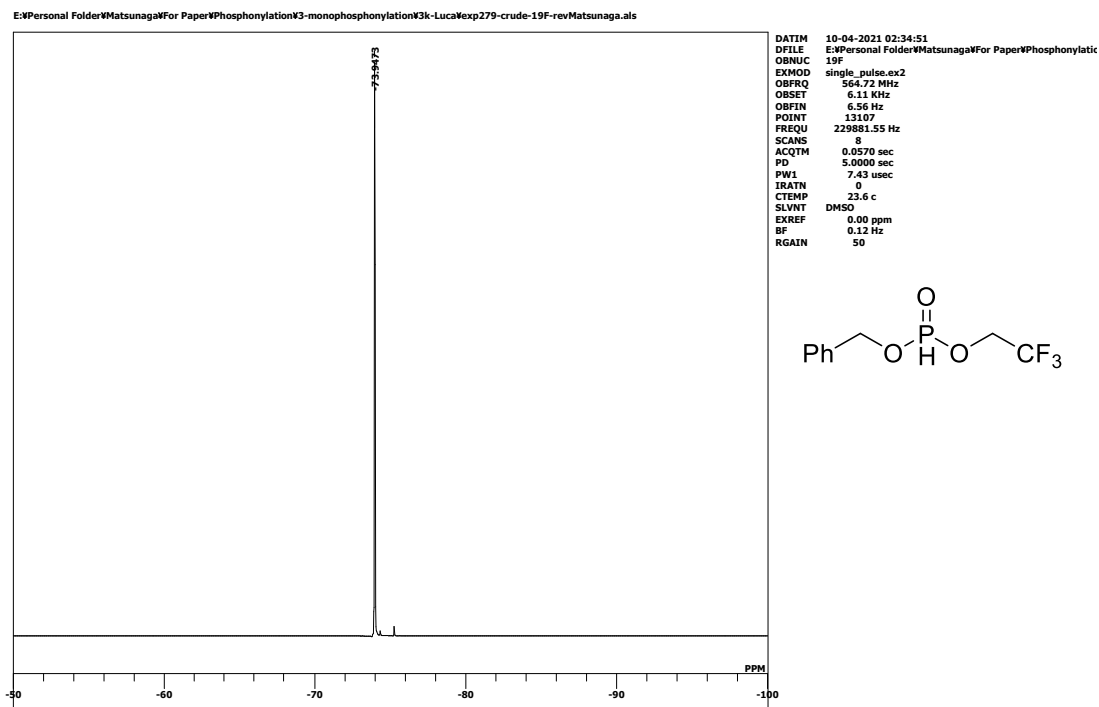

<sup>1</sup>H NMR (600 MHz, DMSO-d<sub>6</sub>) of **31**

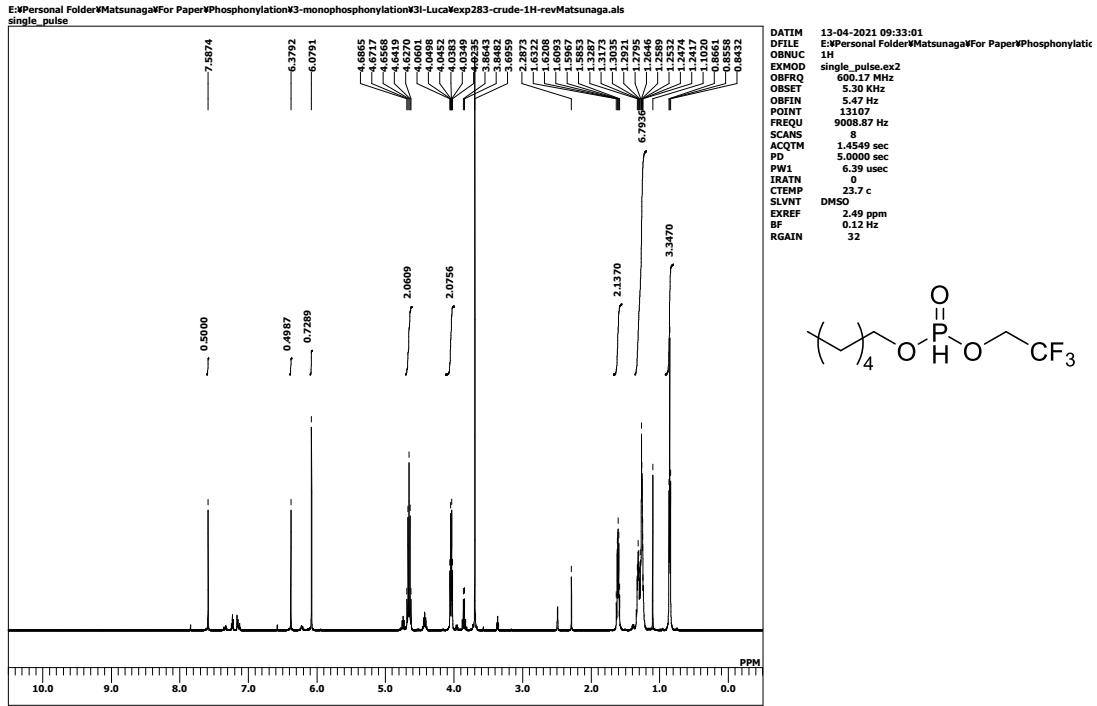

<sup>13</sup>C NMR (151 MHz, DMSO-d<sub>6</sub>) of **31**

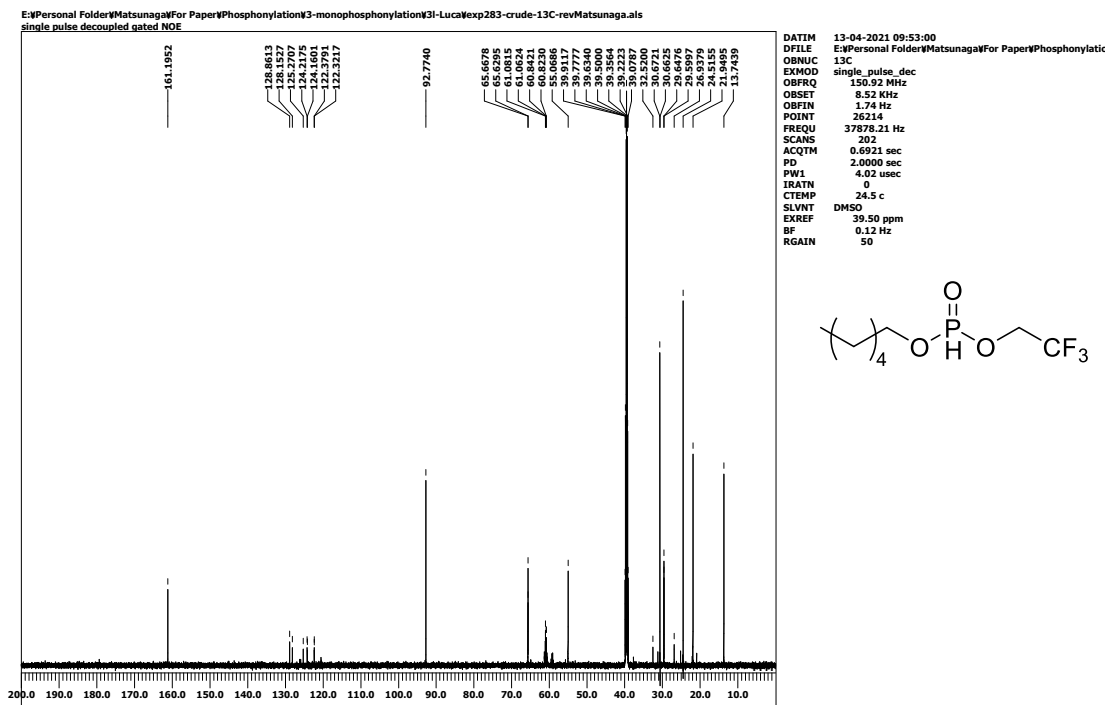

<sup>31</sup>P NMR (243 MHz, DMSO-*d*<sub>6</sub>) of **31**

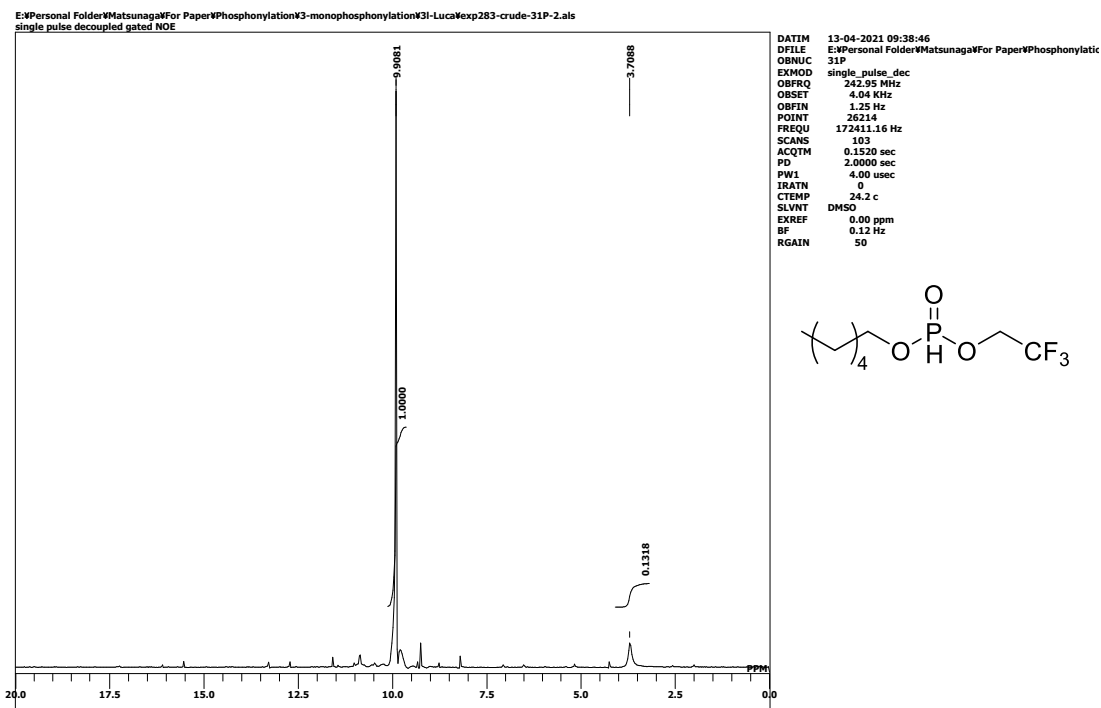

<sup>19</sup>F NMR (565 MHz, DMSO-*d*<sub>6</sub>) of **31**

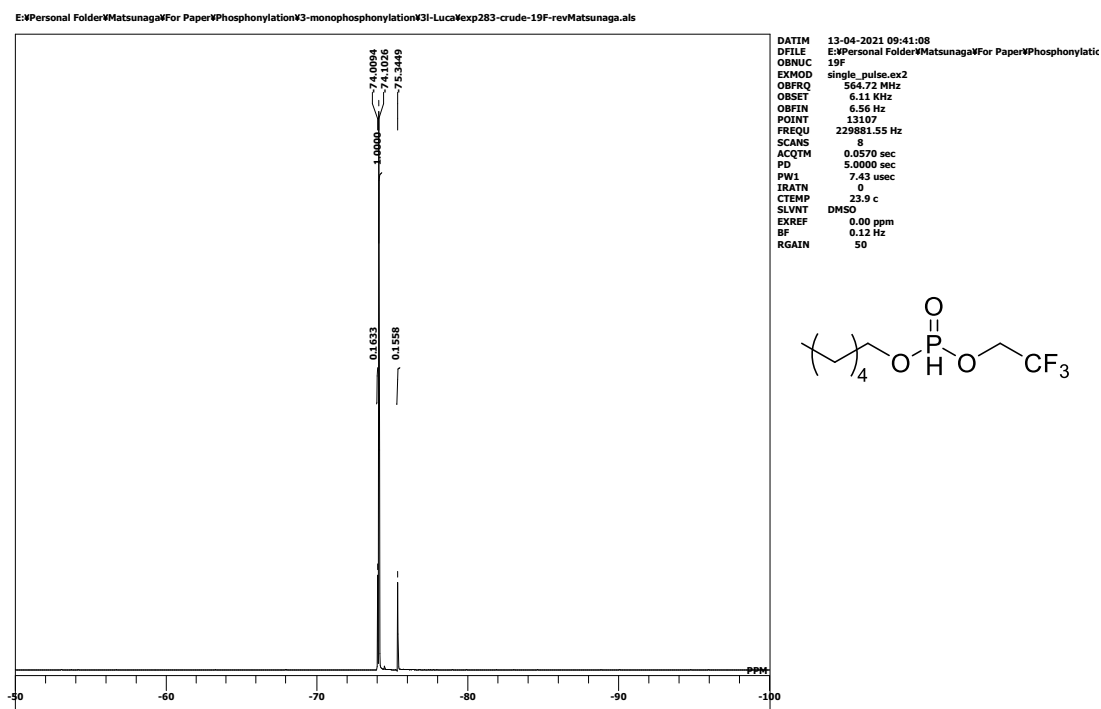

<sup>1</sup>H NMR (600 MHz, DMSO-*d*<sub>6</sub>) of **3m**

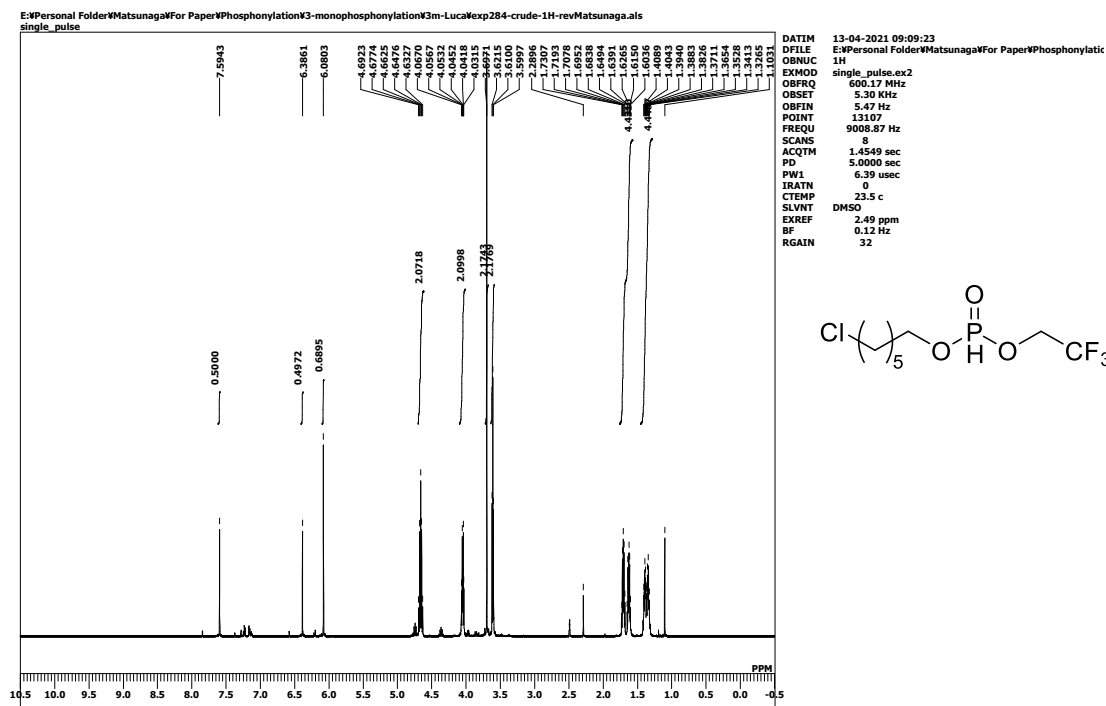

<sup>13</sup>C NMR (151 MHz, DMSO-*d*<sub>6</sub>) of **3m**

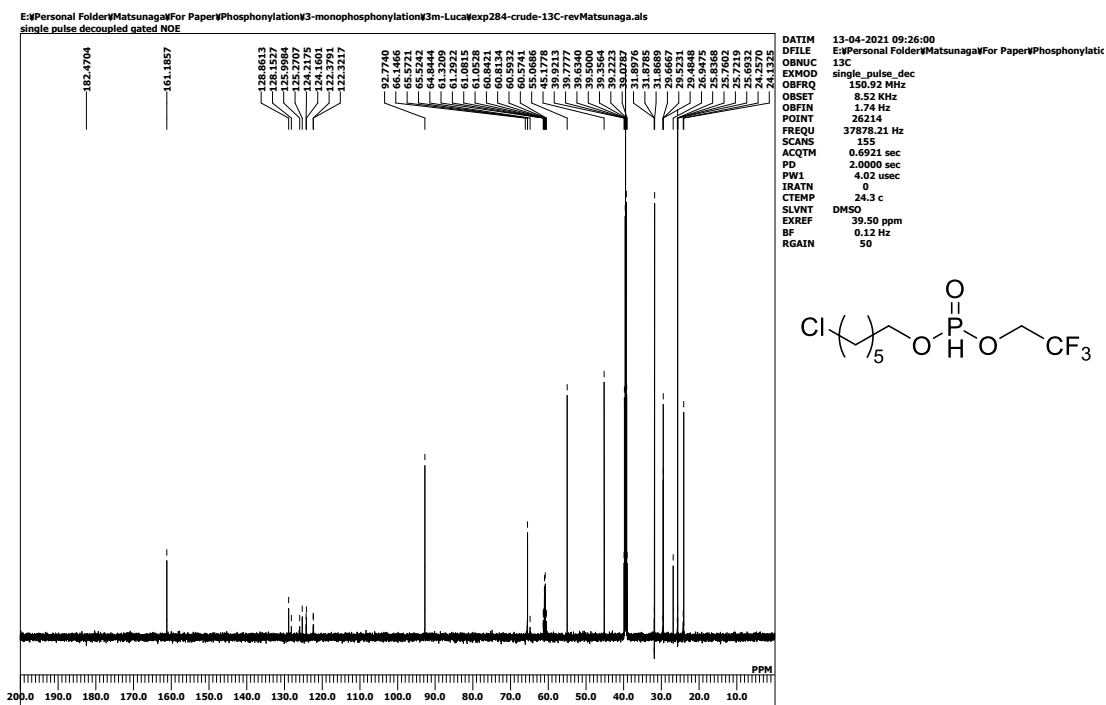



### <sup>31</sup>P NMR (243 MHz, DMSO-*d*<sub>6</sub>) of **3m**

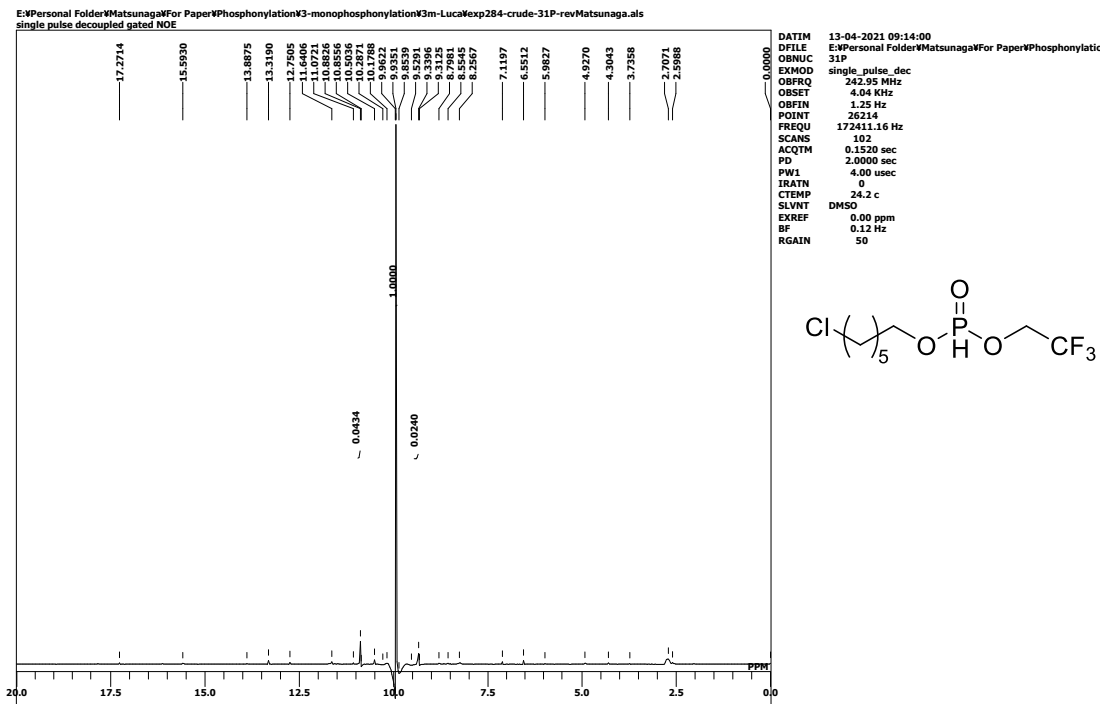

### <sup>19</sup>F NMR (565 MHz, DMSO-*d*<sub>6</sub>) of **3m**

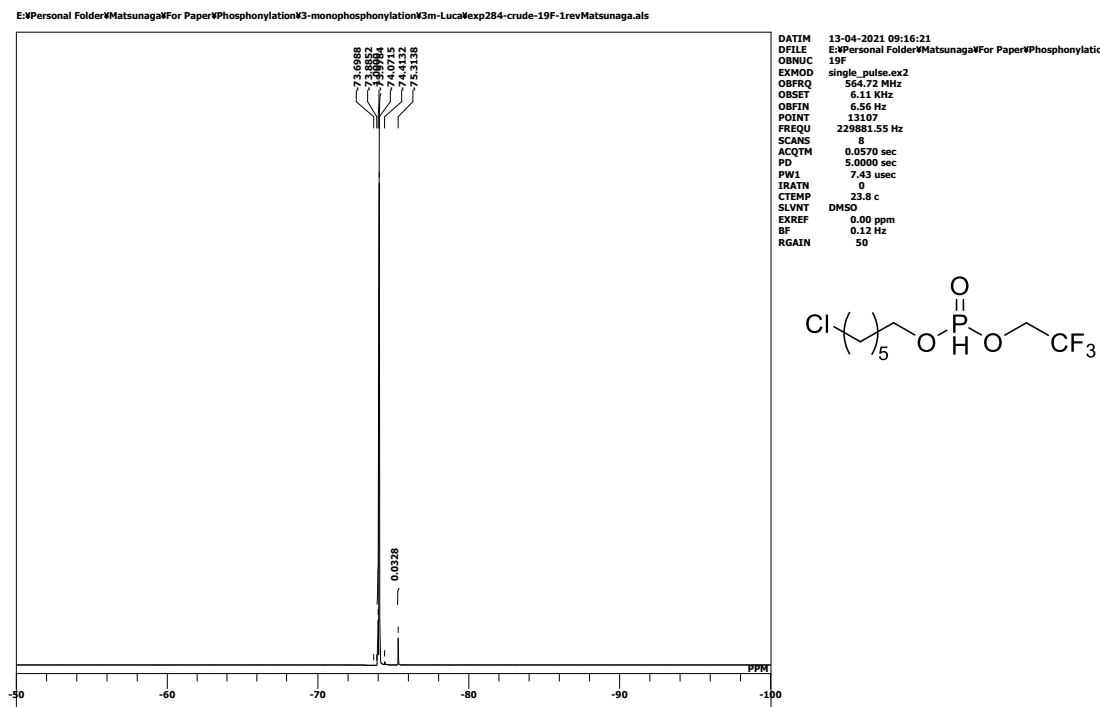

$^1\text{H}$  NMR (600 MHz,  $\text{DMSO-}d_6$ ) of **3n**

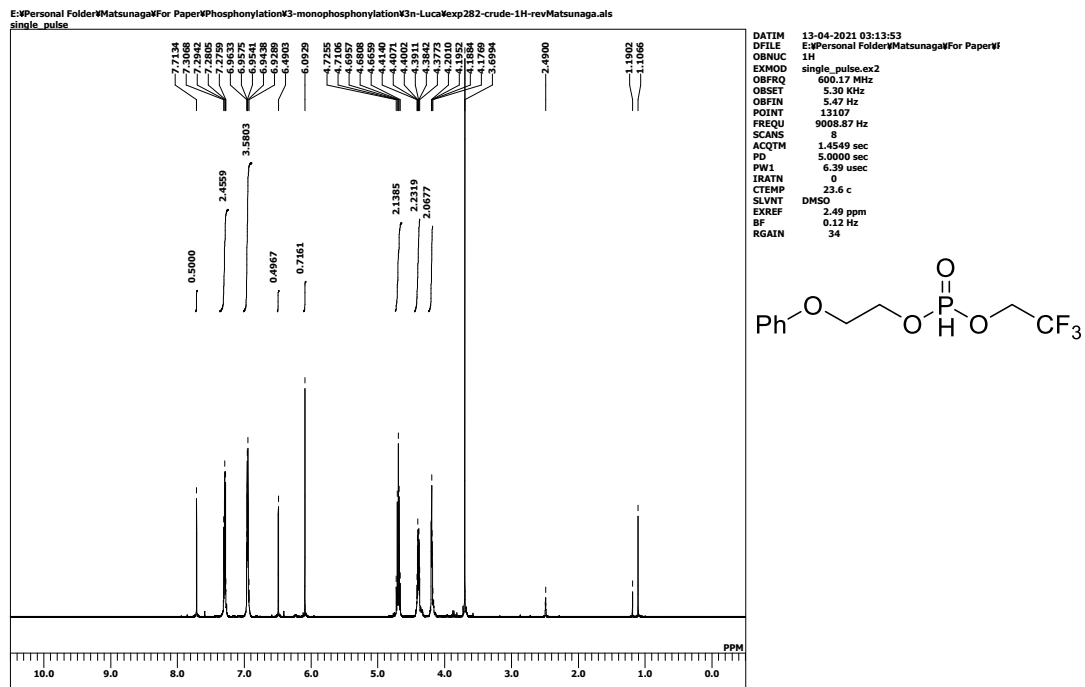

$^{13}\text{C}$  NMR (151 MHz,  $\text{DMSO-}d_6$ ) of **3n**

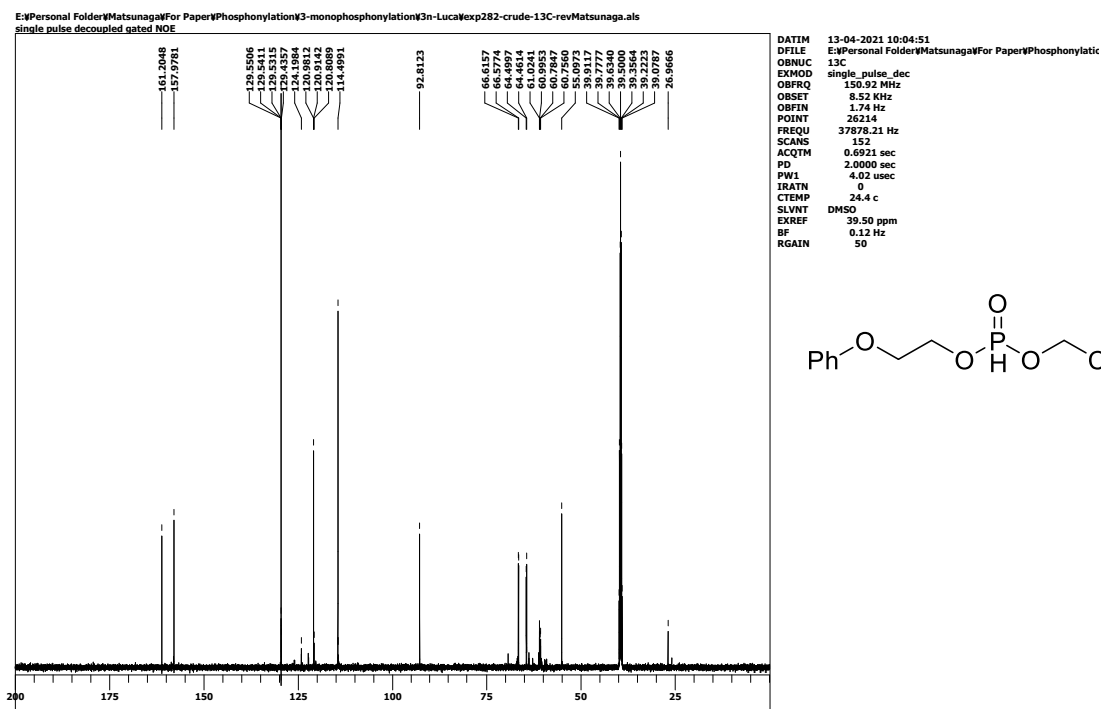

$^{31}\text{P}$  NMR (243 MHz,  $\text{DMSO-}d_6$ ) of **3n**

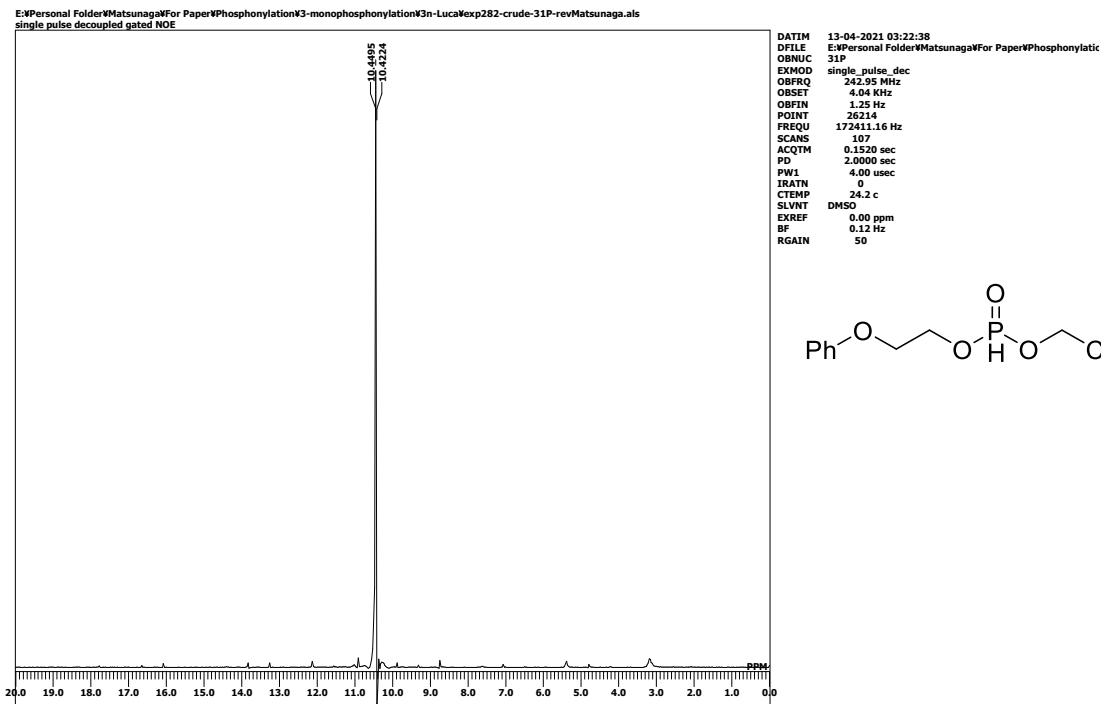

$^{19}\text{F}$  NMR (565 MHz,  $\text{DMSO-}d_6$ ) of **3n**

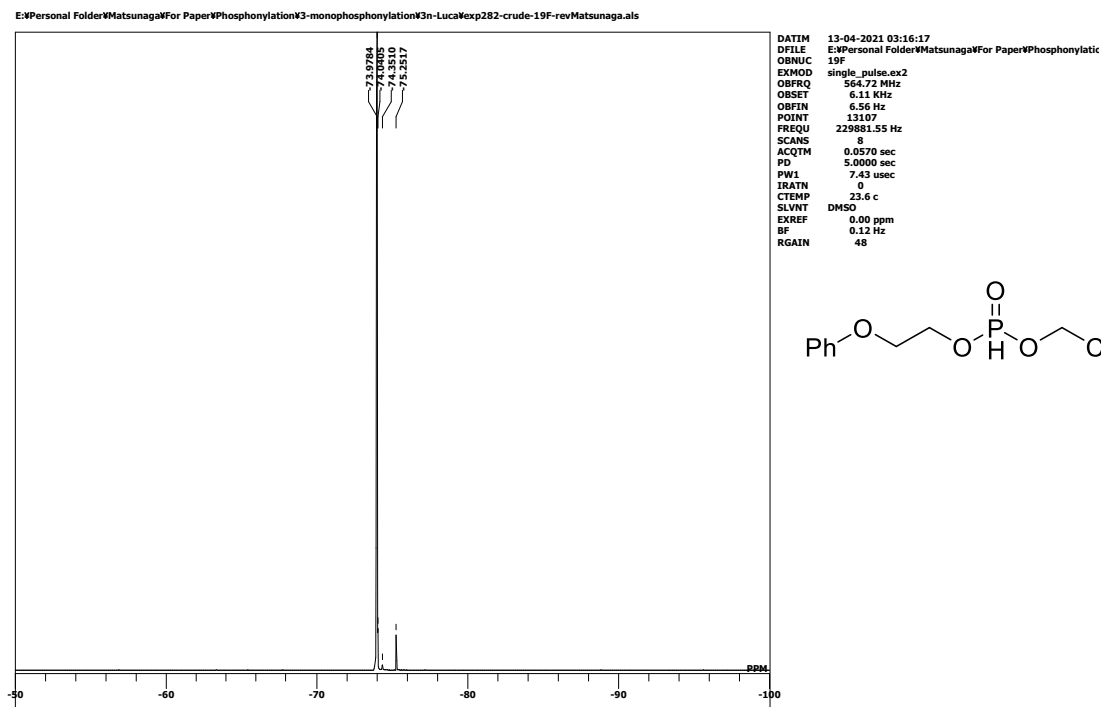

<sup>1</sup>H NMR (600 MHz, DMSO-d<sub>6</sub>) of **30**

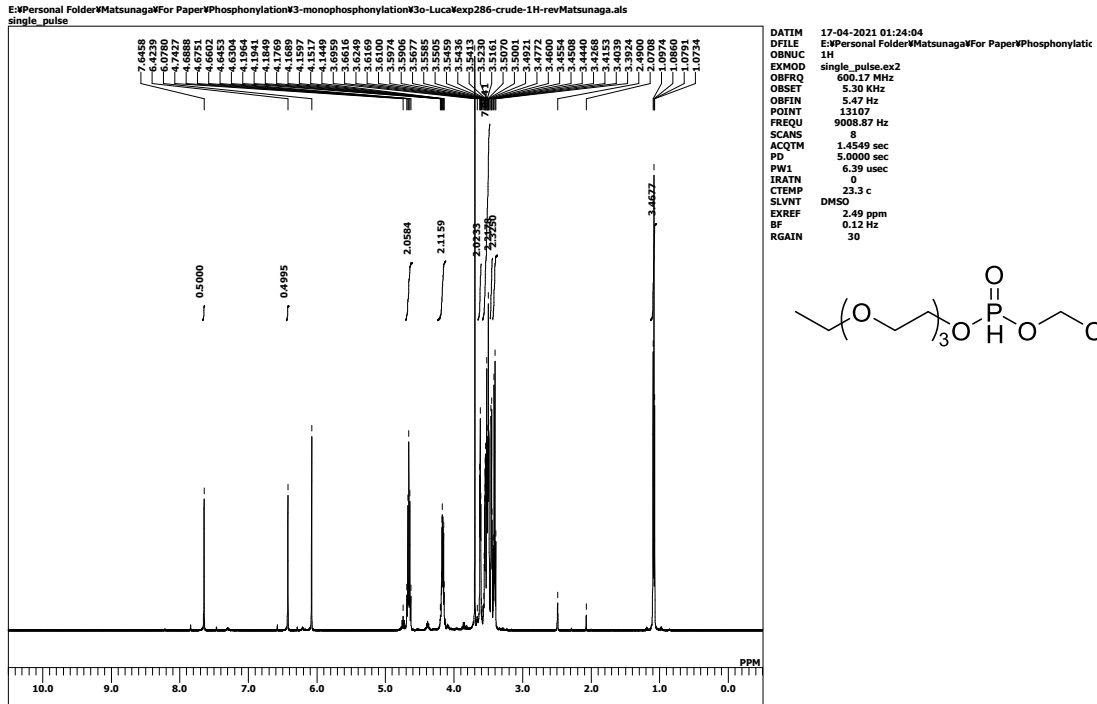

<sup>13</sup>C NMR (151 MHz, DMSO-d<sub>6</sub>) of **30**

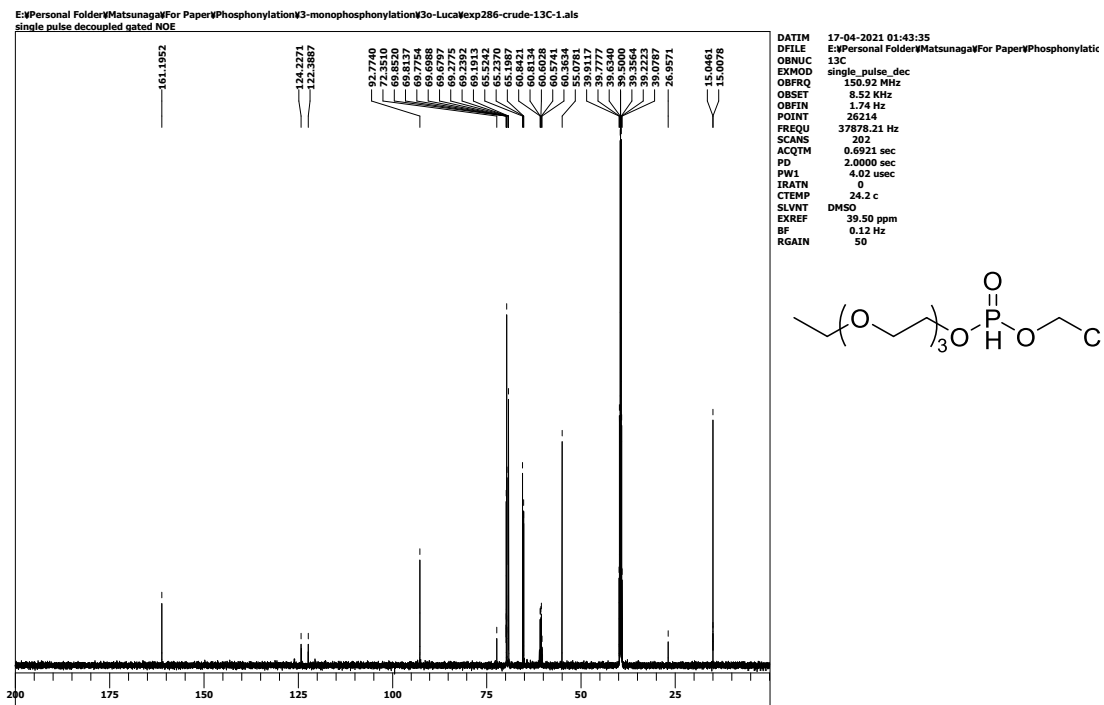

$^{31}\text{P}$  NMR (243 MHz,  $\text{DMSO-}d_6$ ) of **30**

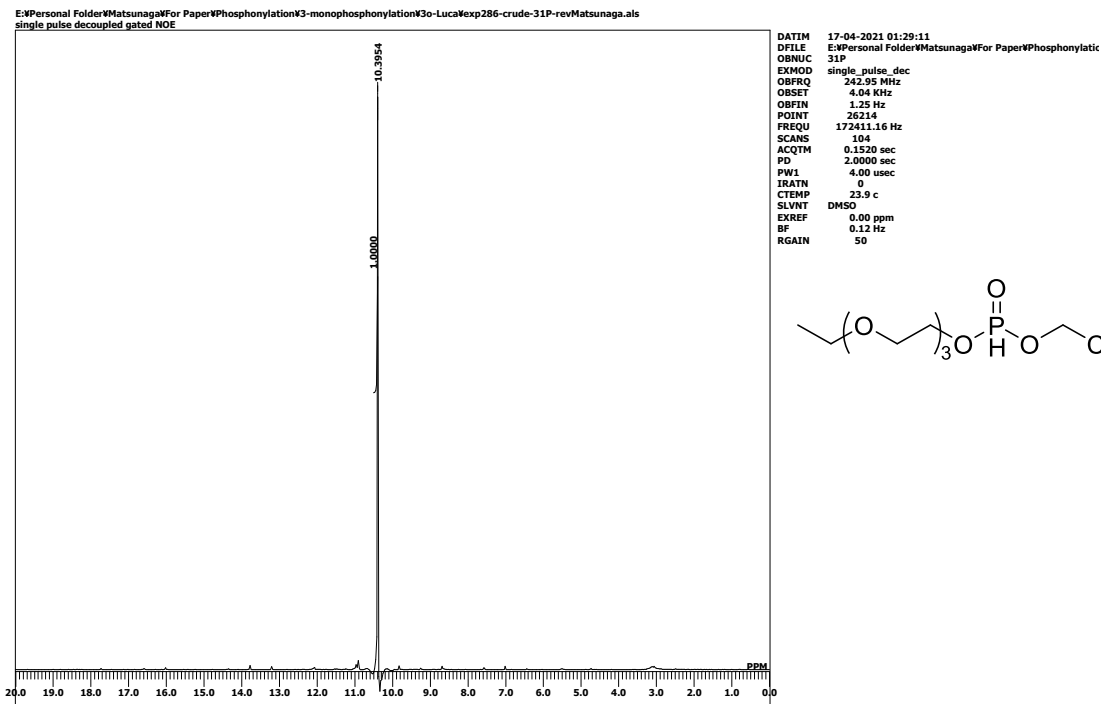

$^{19}\text{F}$  NMR (565 MHz,  $\text{DMSO-}d_6$ ) of **30**

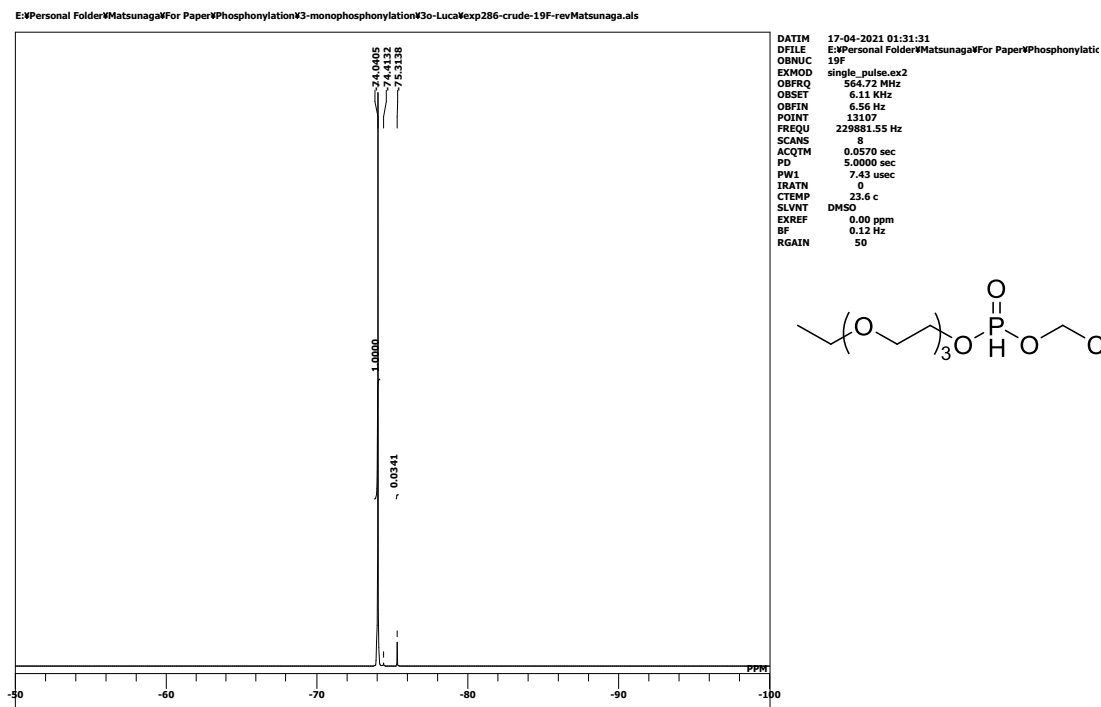

<sup>1</sup>H NMR (600 MHz, DMSO-d<sub>6</sub>) of **3p**

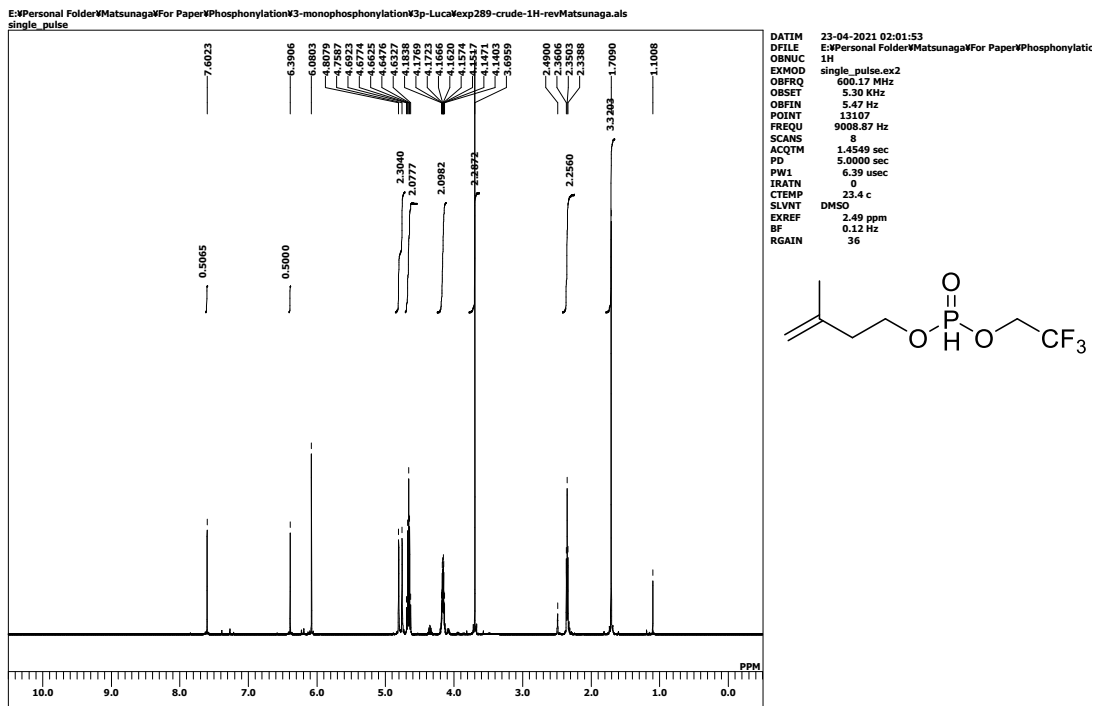

<sup>13</sup>C NMR (151 MHz, DMSO-d<sub>6</sub>) of **3p**

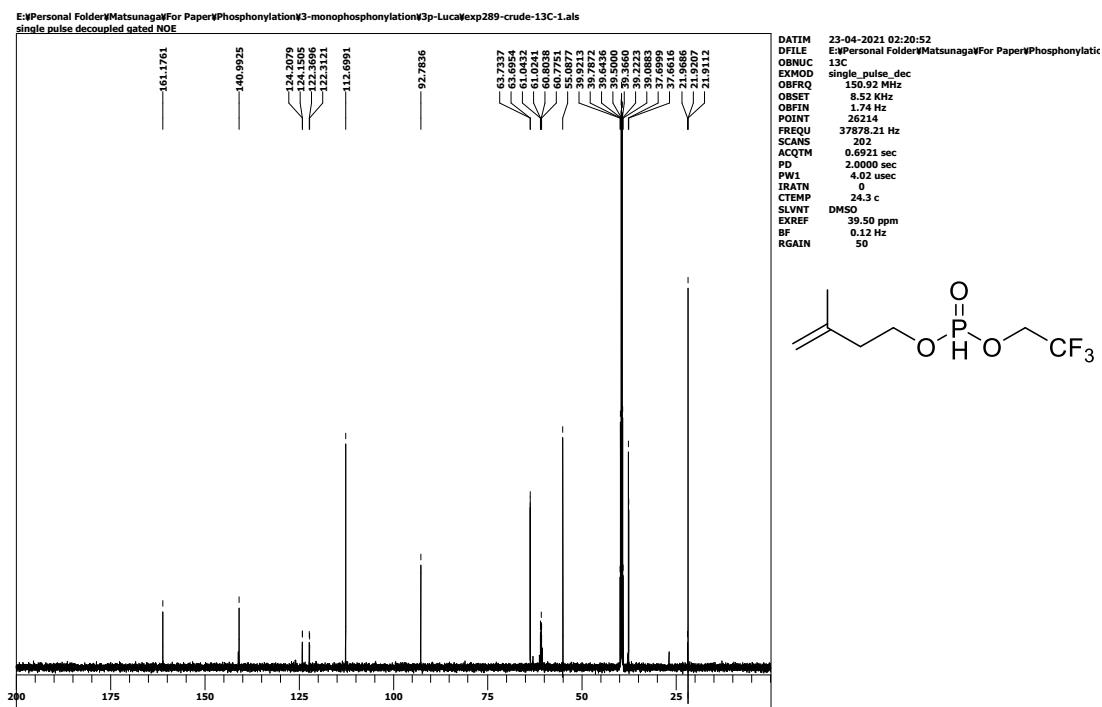

### <sup>31</sup>P NMR (243 MHz, DMSO-*d*<sub>6</sub>) of **3p**

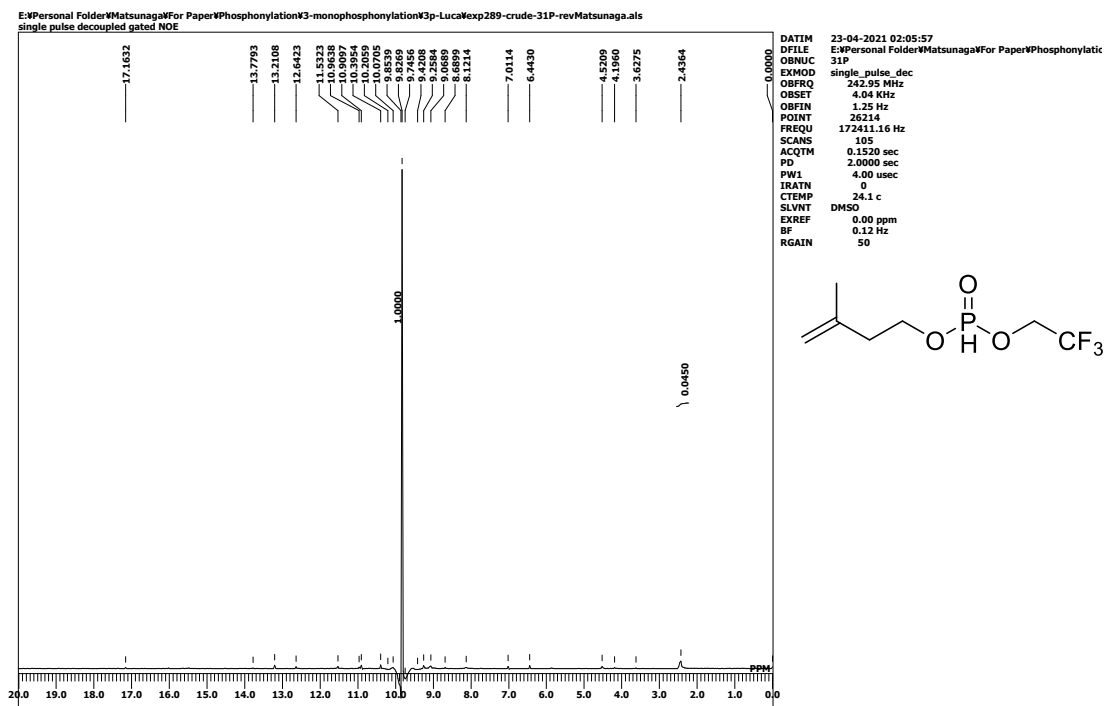

### <sup>19</sup>F NMR (565 MHz, DMSO-*d*<sub>6</sub>) of **3p**

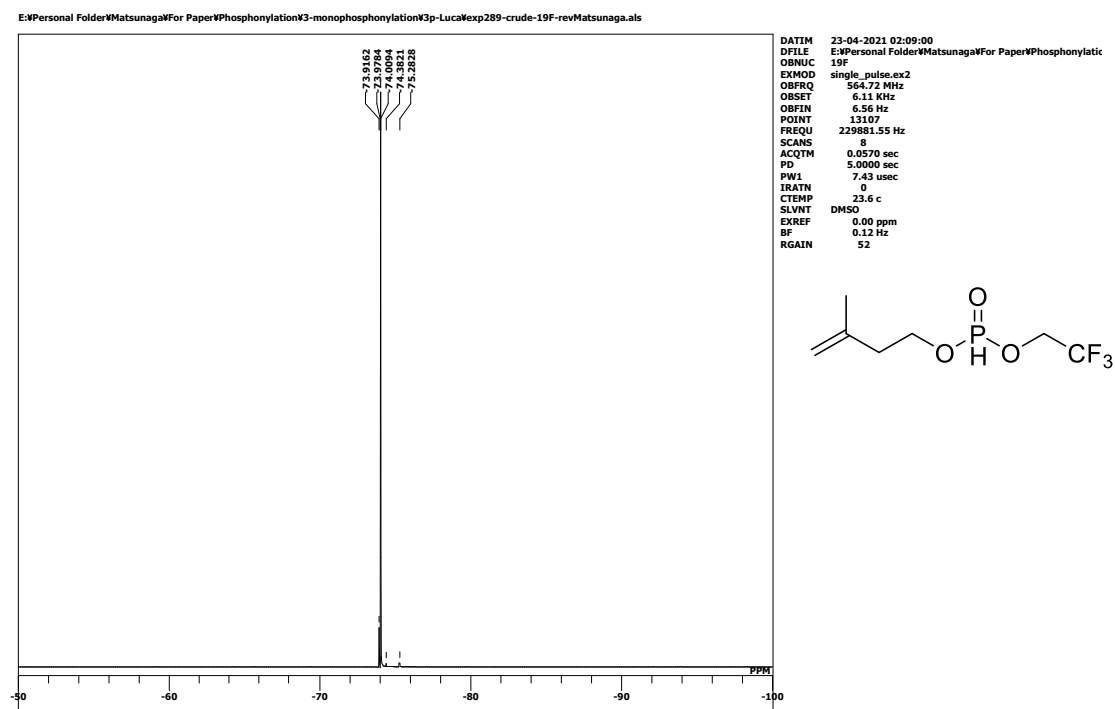

<sup>1</sup>H NMR (600 MHz, DMSO-d<sub>6</sub>) of **3q**

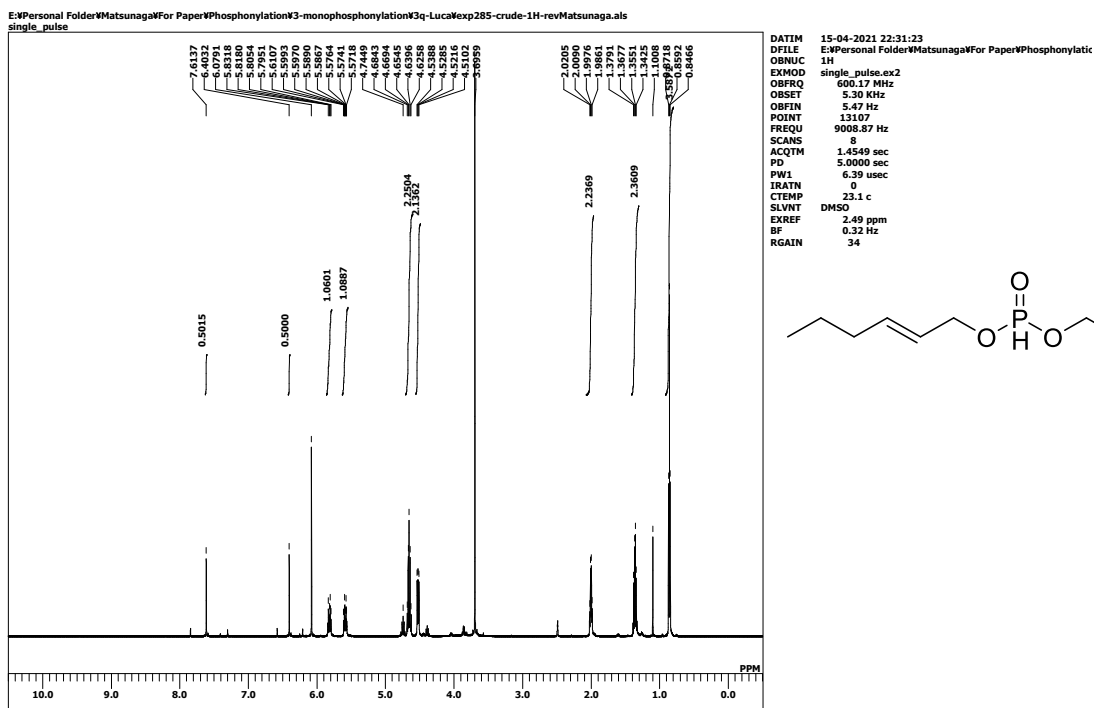

<sup>13</sup>C NMR (151 MHz, DMSO-d<sub>6</sub>) of **3q**

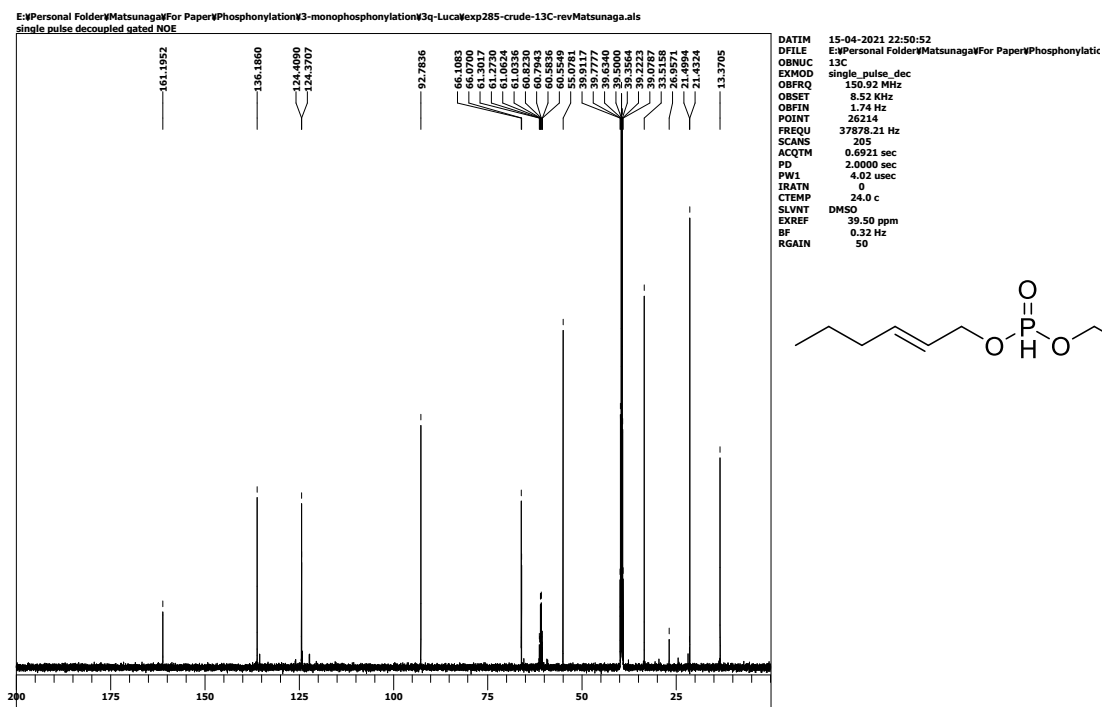



<sup>31</sup>P NMR (243 MHz, DMSO-*d*<sub>6</sub>) of **3q**

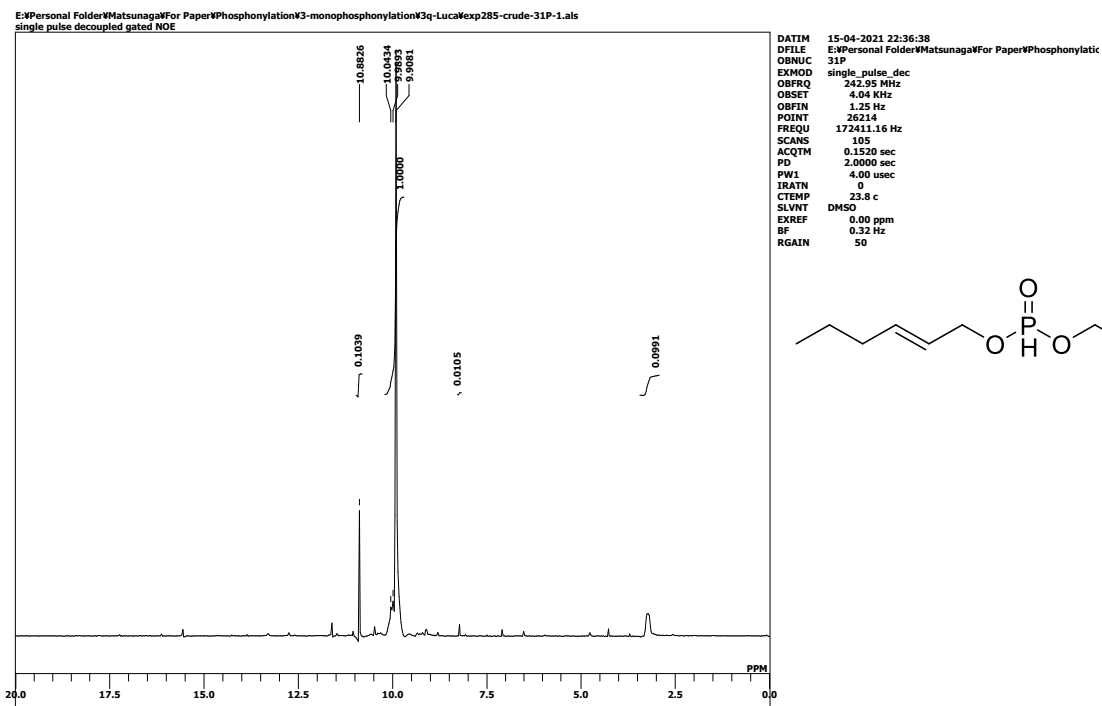

<sup>19</sup>F NMR (565 MHz, DMSO-*d*<sub>6</sub>) of **3q**

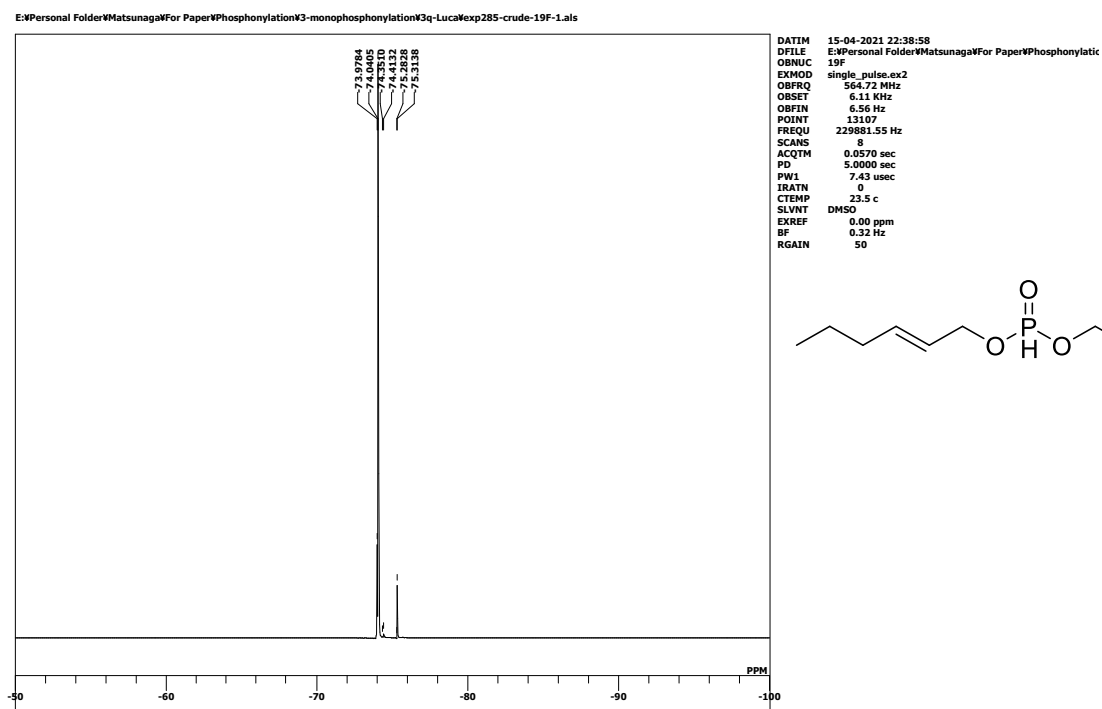

# <sup>1</sup>H NMR (600 MHz, DMSO-d<sub>6</sub>) of 3r

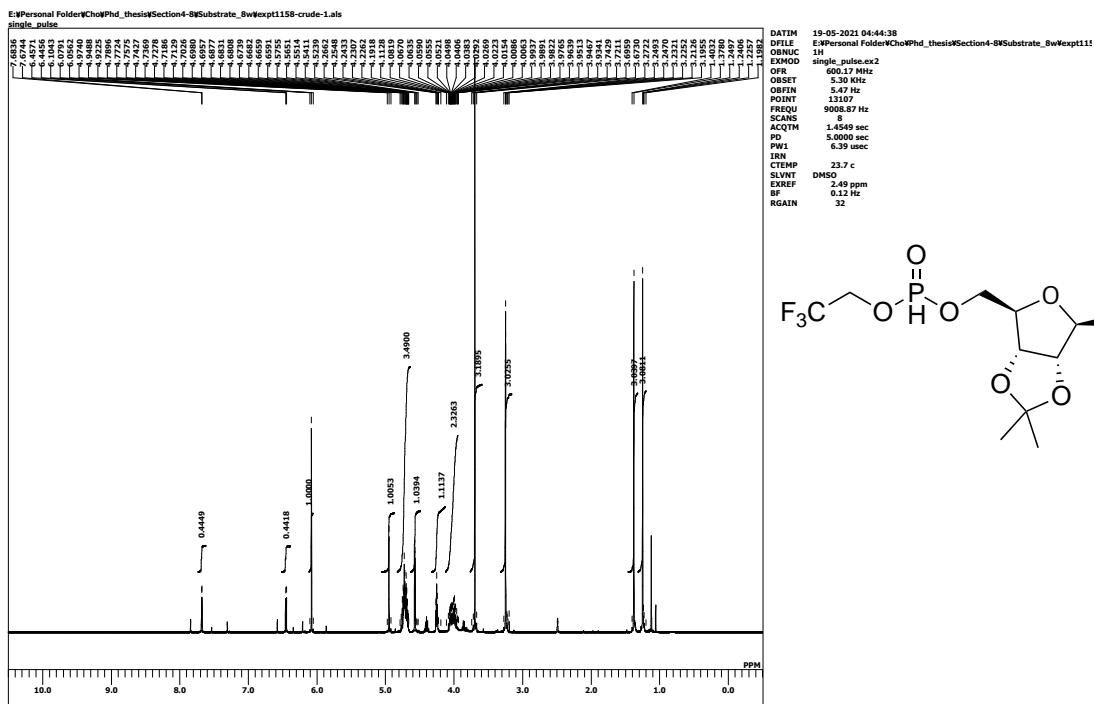

# <sup>13</sup>C NMR (151 MHz, DMSO-d<sub>6</sub>) of 3r

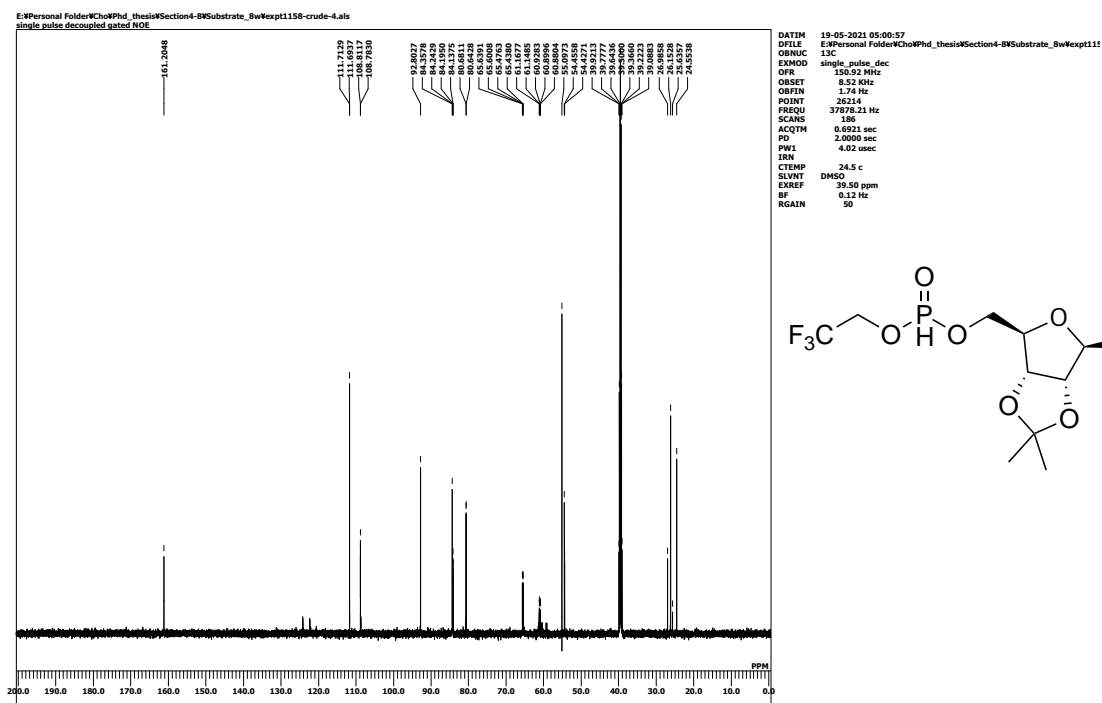

<sup>31</sup>P NMR (243 MHz, DMSO-*d*<sub>6</sub>) of **3r**

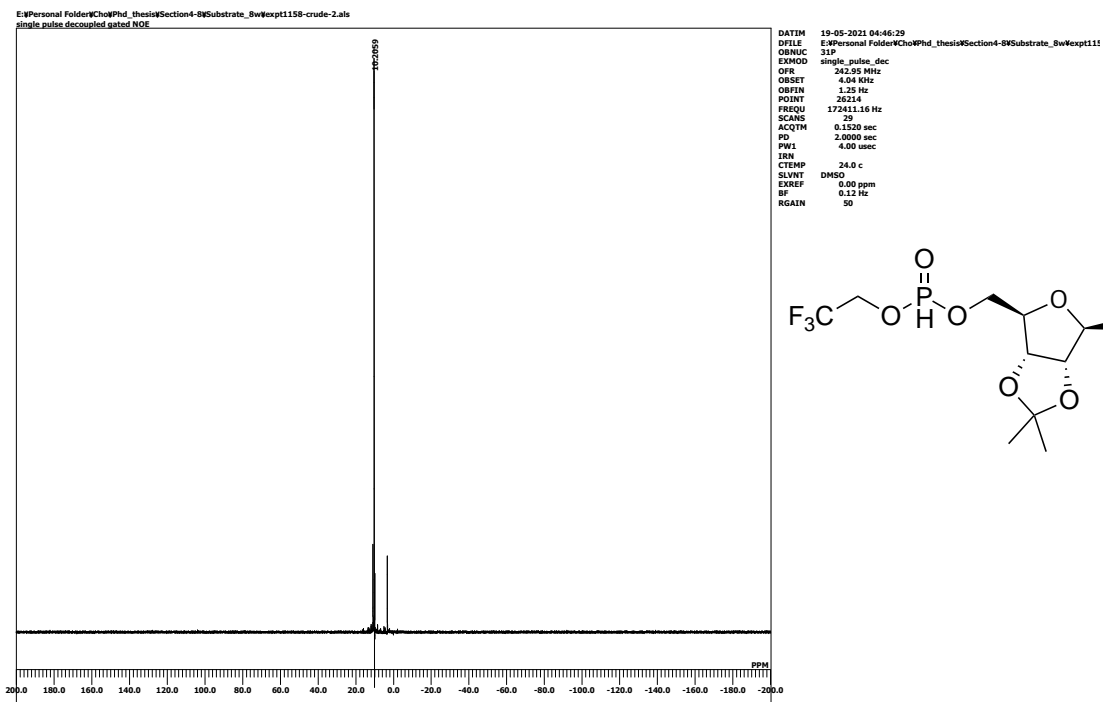

<sup>19</sup>F NMR (565 MHz, DMSO-*d*<sub>6</sub>) of **3r**

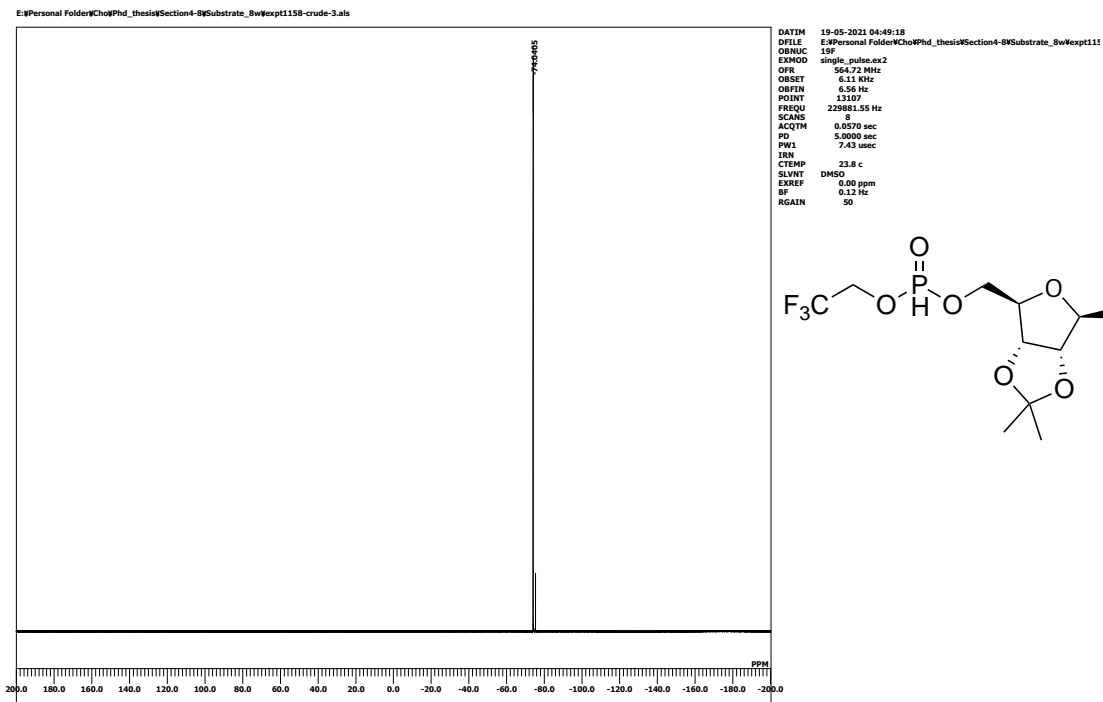

# <sup>1</sup>H NMR (600 MHz, CDCl<sub>3</sub>) of 3s

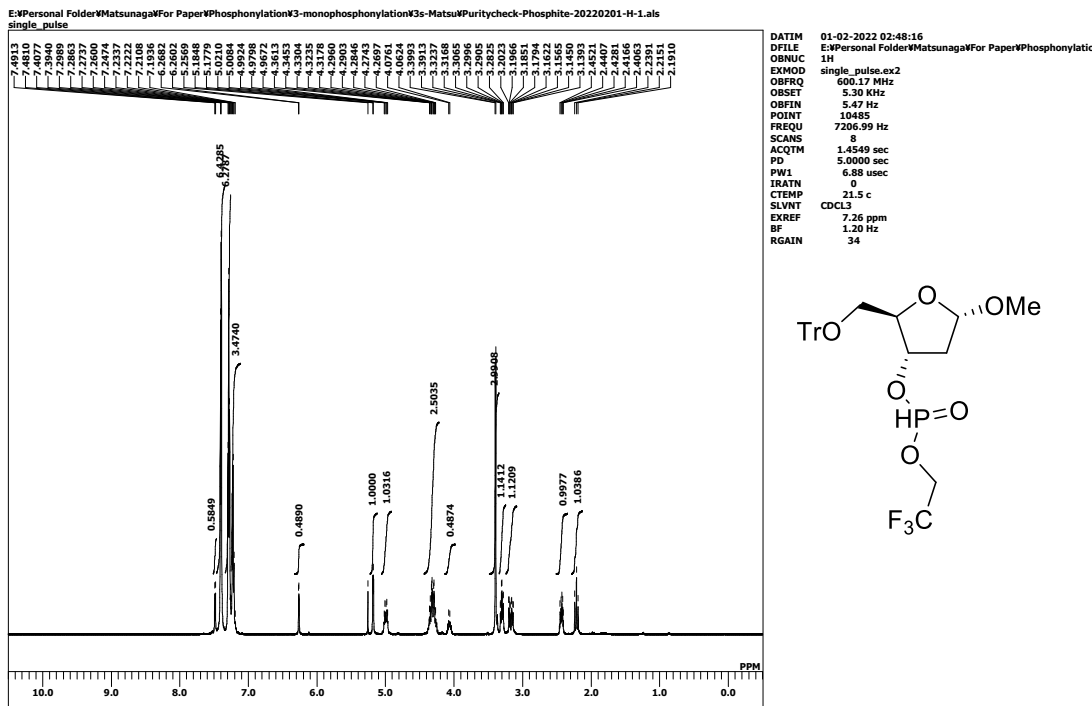

# <sup>13</sup>C NMR (151 MHz, CDCl<sub>3</sub>) of 3s

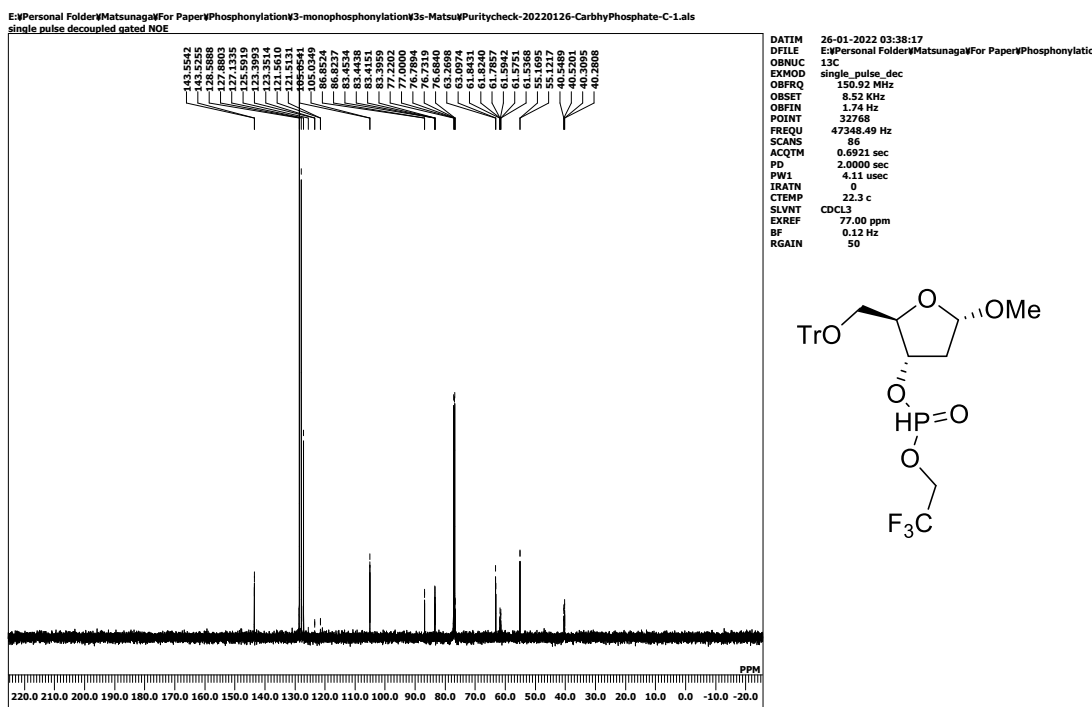

$^{31}\text{P}$  NMR (243 MHz,  $\text{CDCl}_3$ ) of **3s**

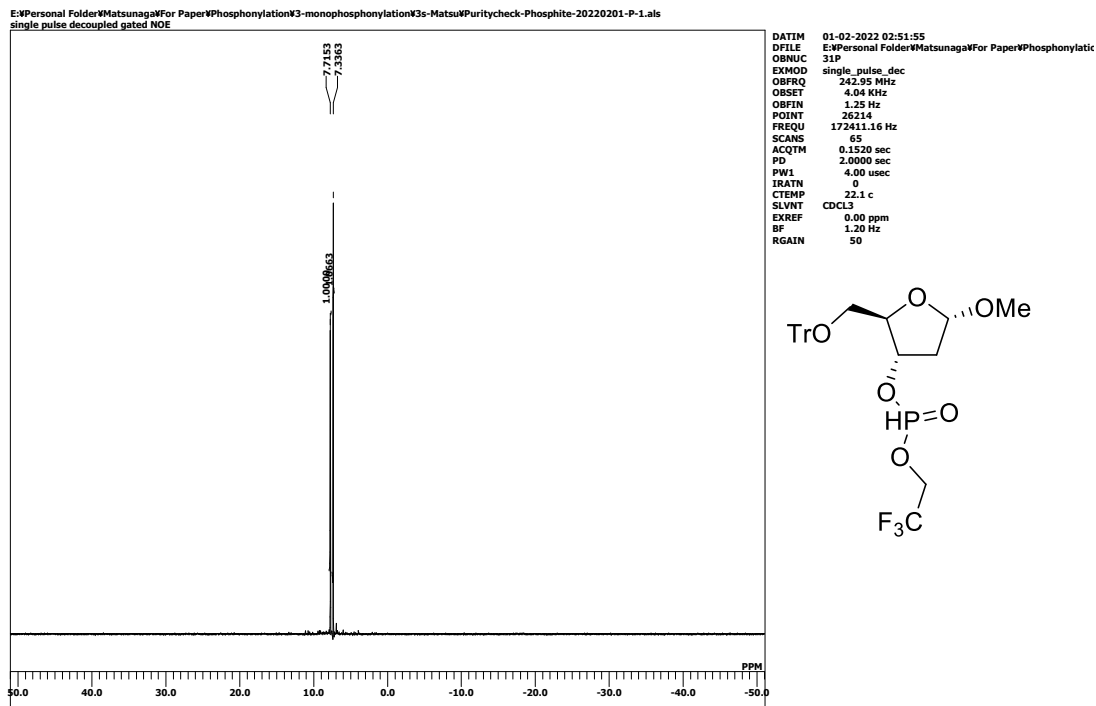

$^{19}\text{F}$  NMR (565 MHz,  $\text{CDCl}_3$ ) of **3s**

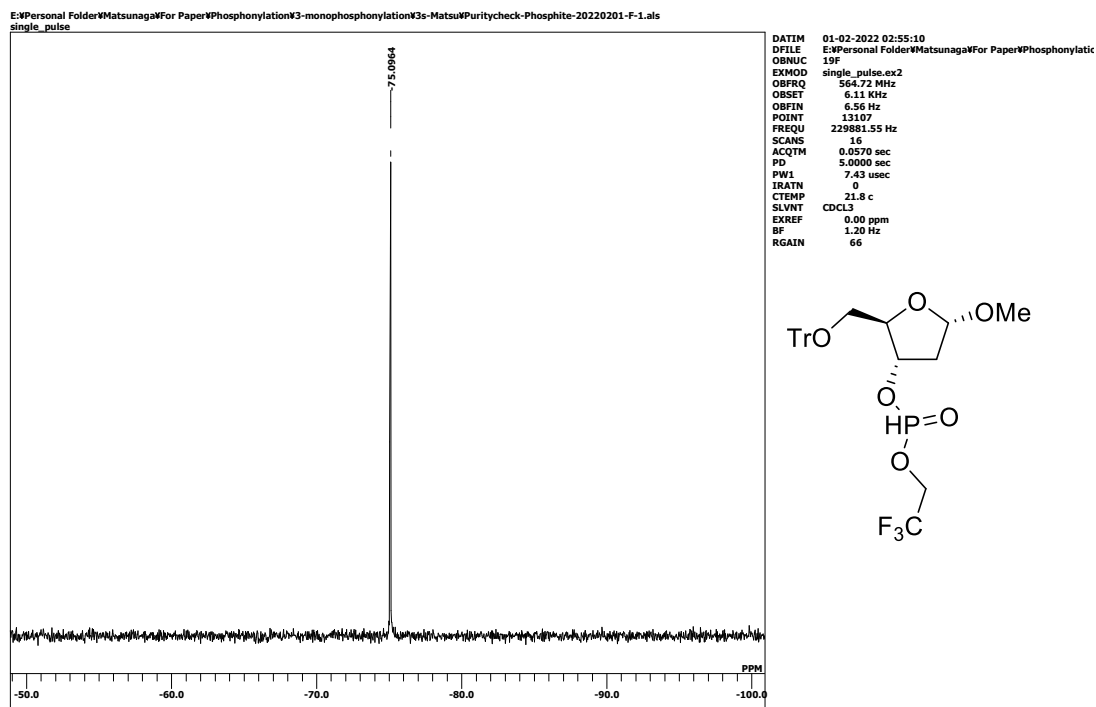

# <sup>1</sup>H NMR (600 MHz, DMSO-d<sub>6</sub>) of **3t**

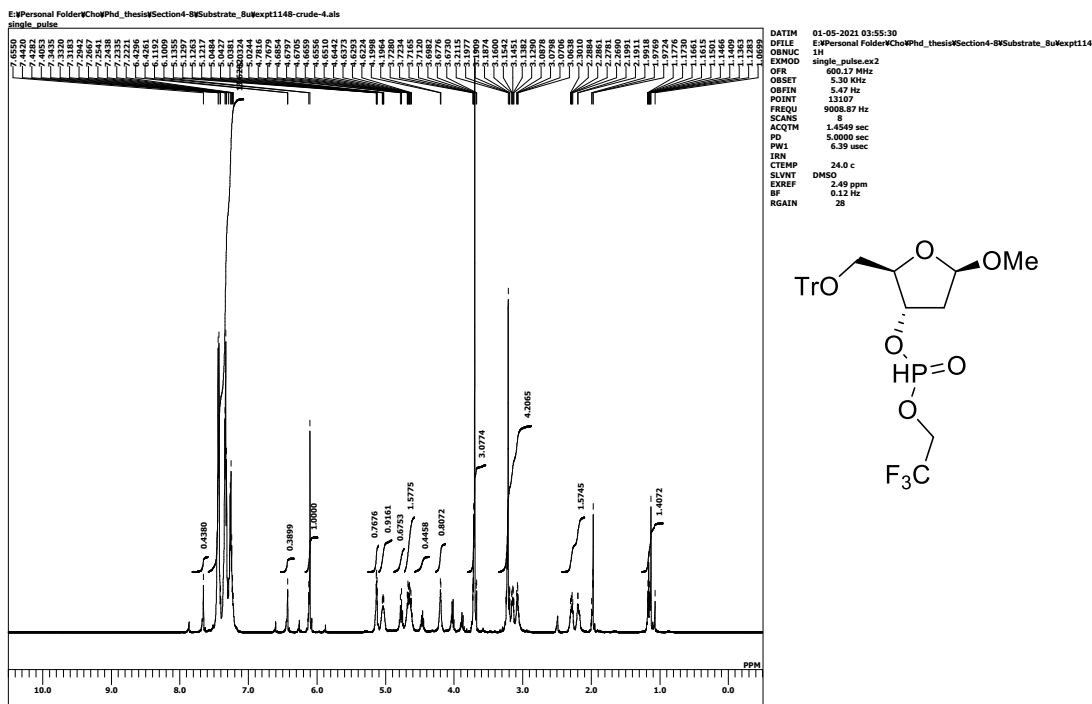

# <sup>13</sup>C NMR (151 MHz, DMSO-d<sub>6</sub>) of **3t**

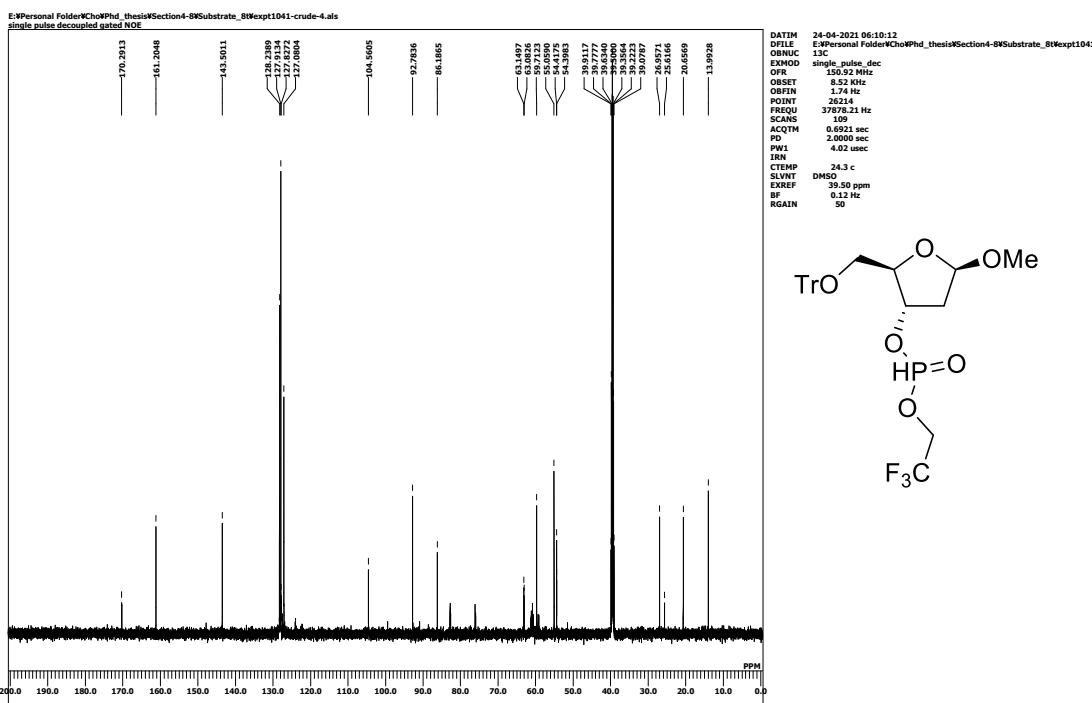

### $^{31}\text{P}$ NMR (243 MHz, $\text{DMSO-}d_6$ ) of **3t**

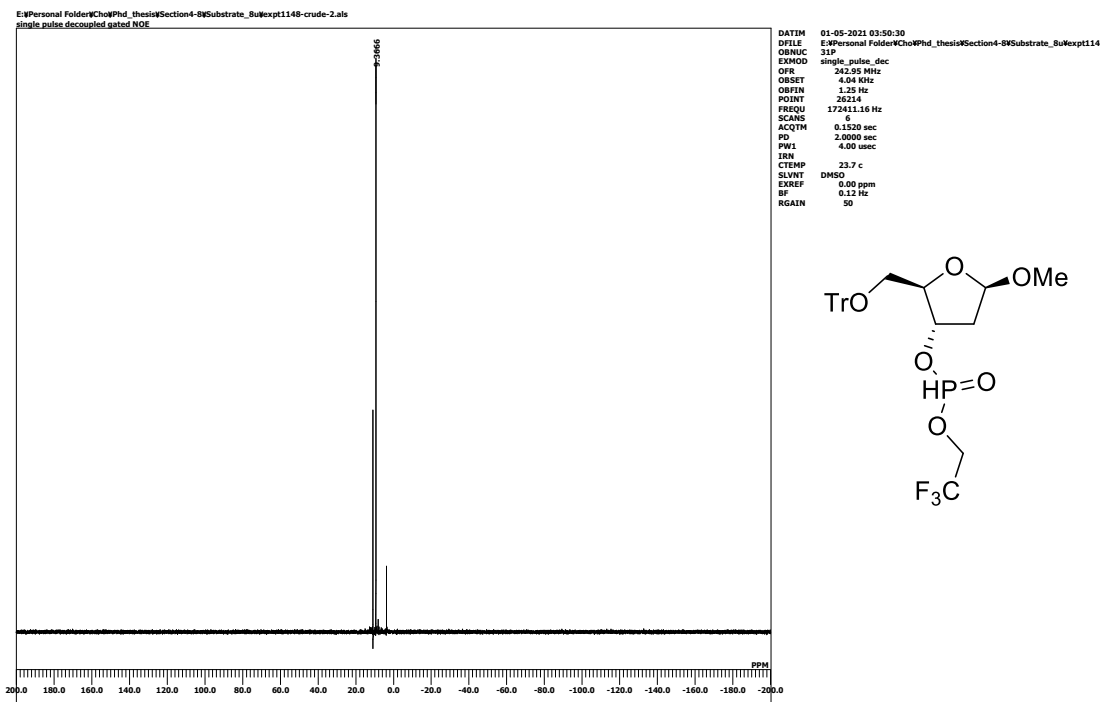

### $^{19}\text{F}$ NMR (565 MHz, $\text{DMSO-}d_6$ ) of **3t**

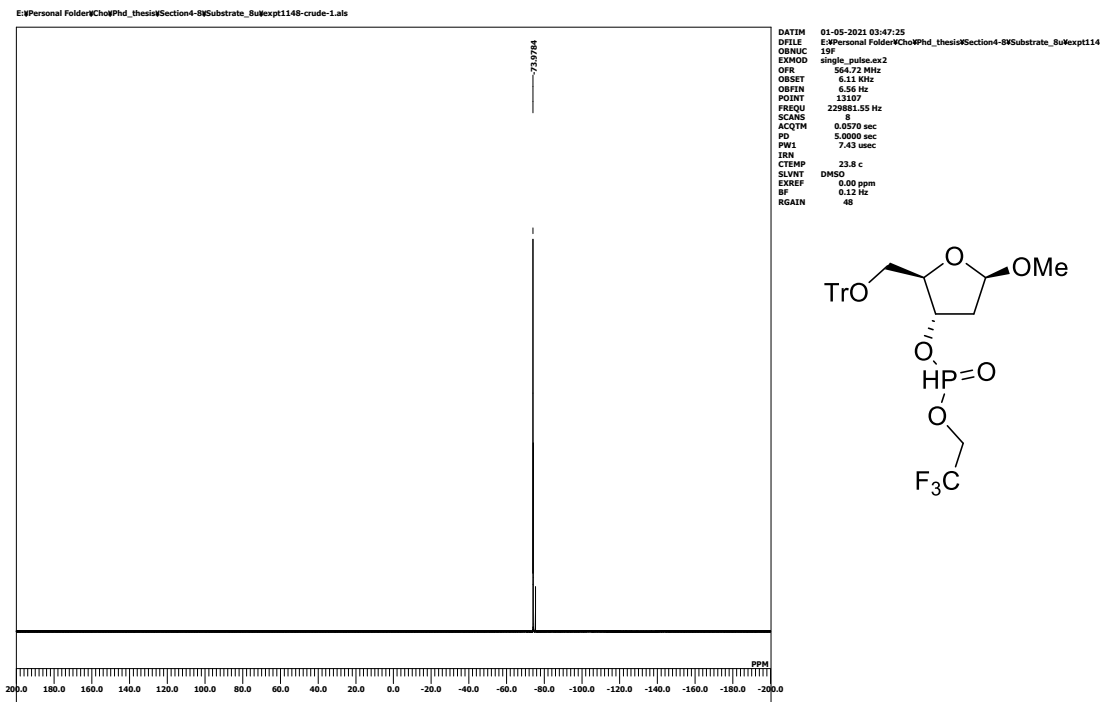

# <sup>1</sup>H NMR (600 MHz, DMSO-d<sub>6</sub>) of **3u**

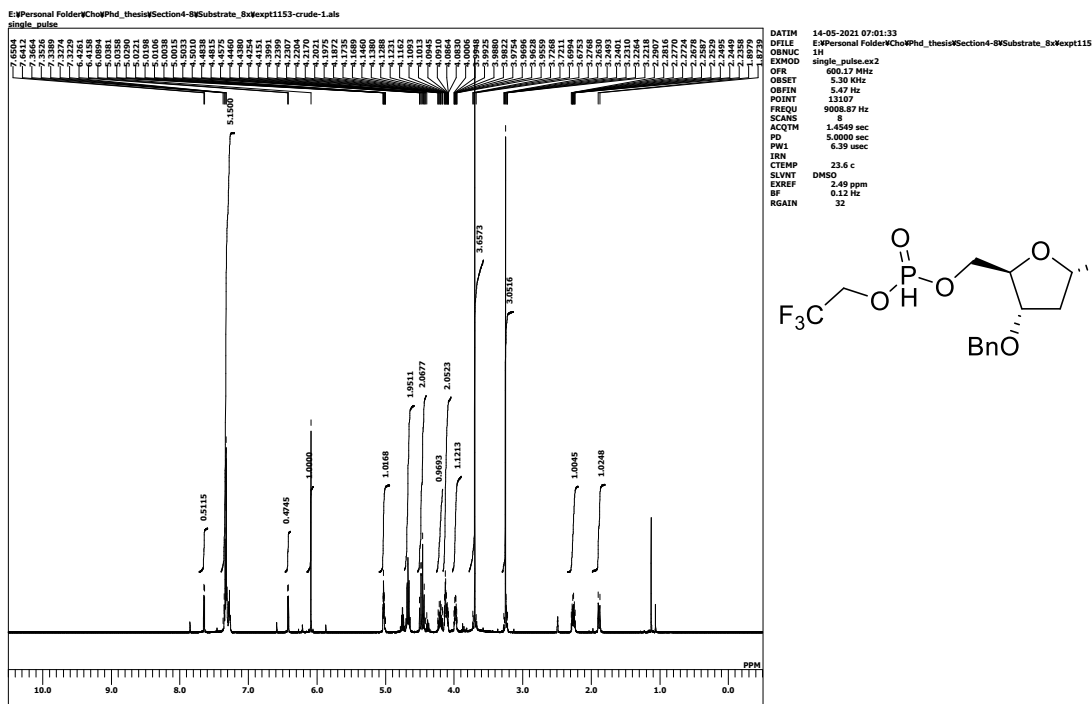

# <sup>13</sup>C NMR (151 MHz, DMSO-d<sub>6</sub>) of **3u**

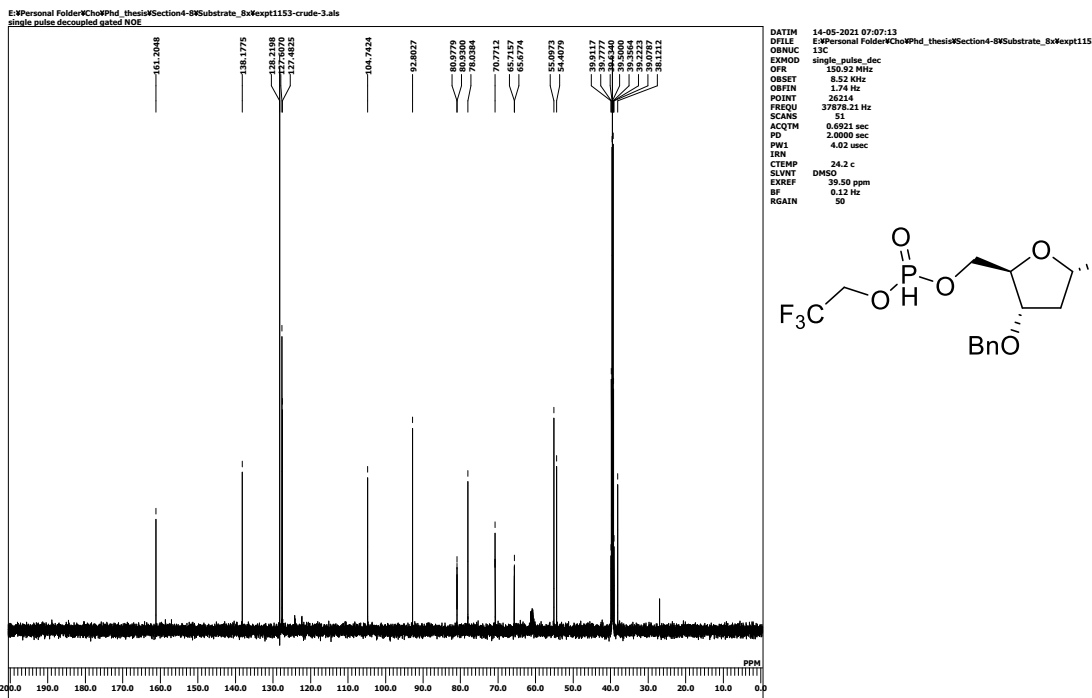



$^{31}\text{P}$  NMR (243 MHz,  $\text{DMSO-}d_6$ ) of **3u**

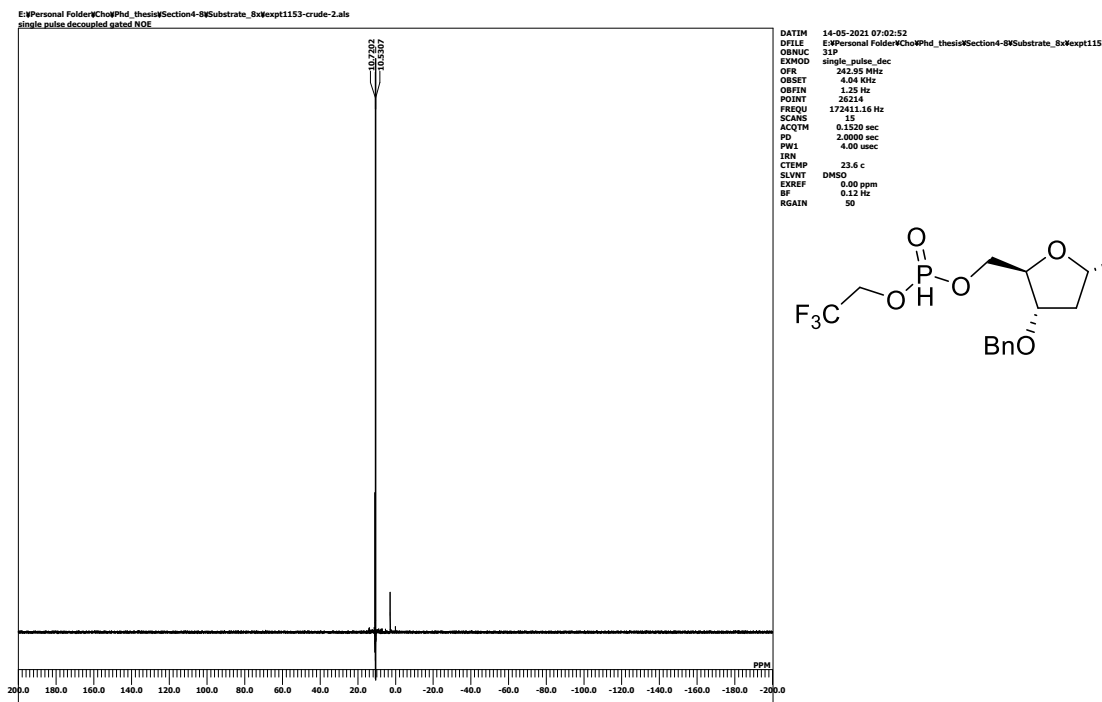

$^{19}\text{F}$  NMR (565 MHz,  $\text{DMSO-}d_6$ ) of **3u**

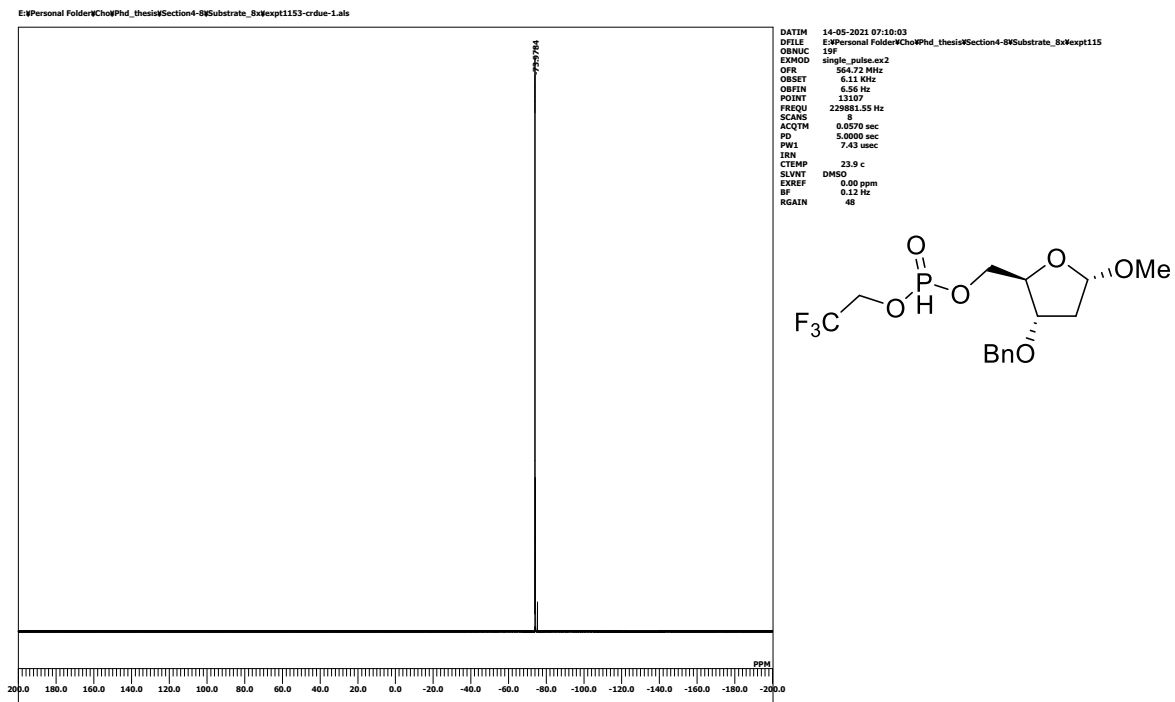

<sup>1</sup>H NMR (600 MHz, DMSO-d<sub>6</sub>) of **3v**

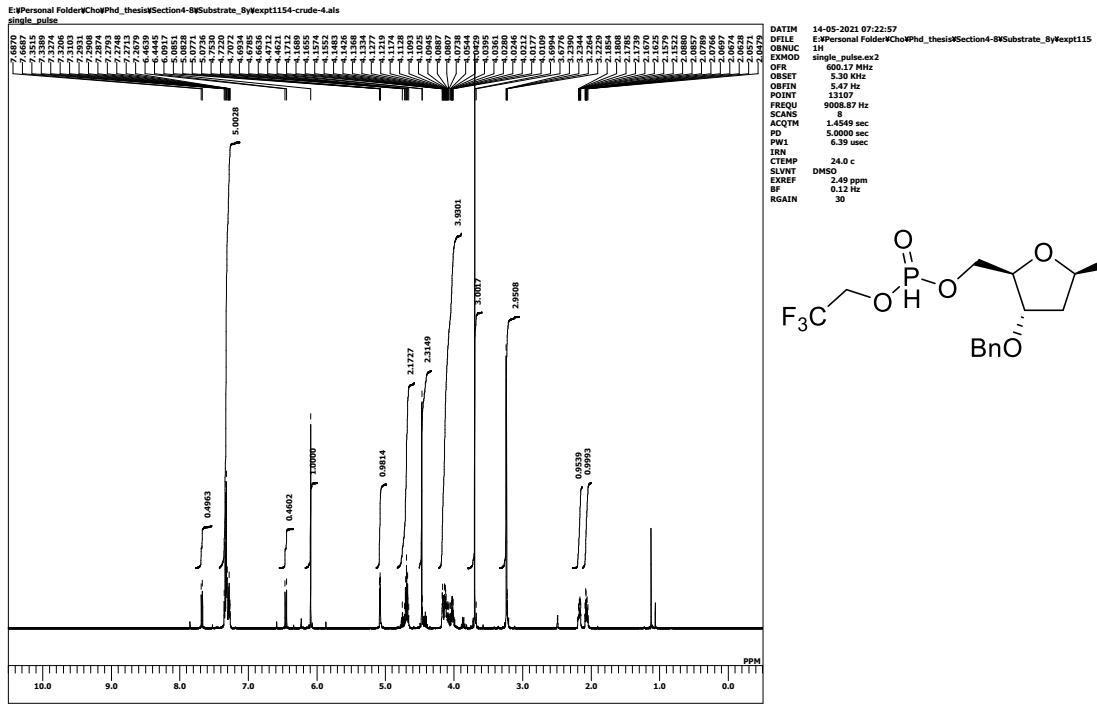

<sup>13</sup>C NMR (151 MHz, DMSO-d<sub>6</sub>) of **3v**

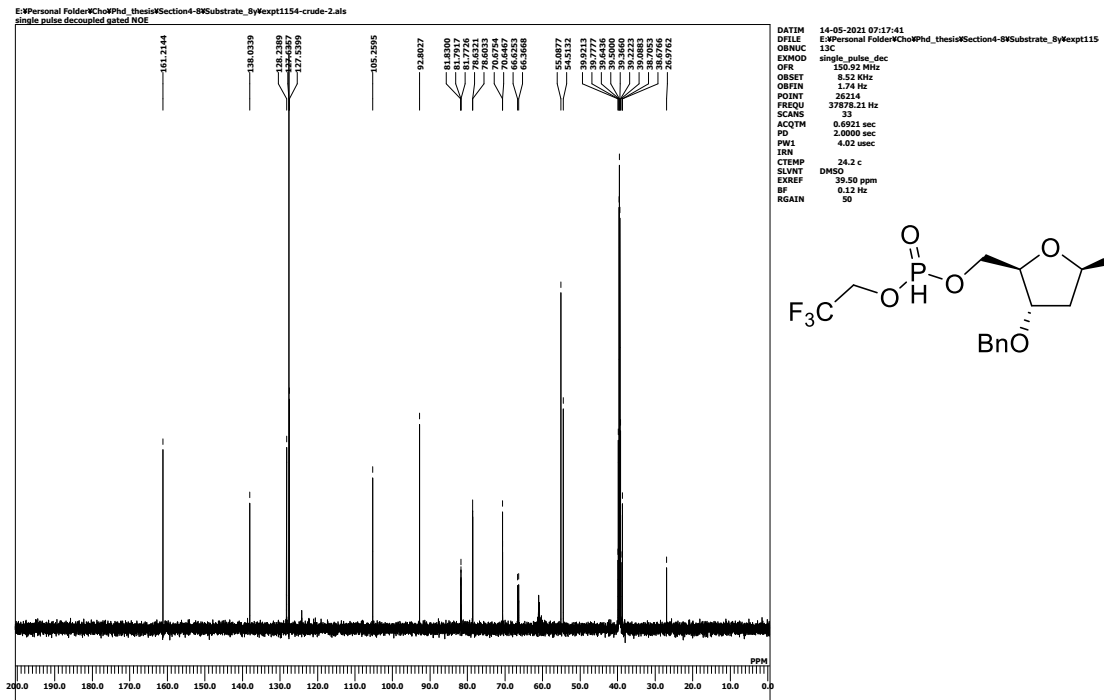

$^{31}\text{P}$  NMR (243 MHz,  $\text{DMSO-}d_6$ ) of **3v**

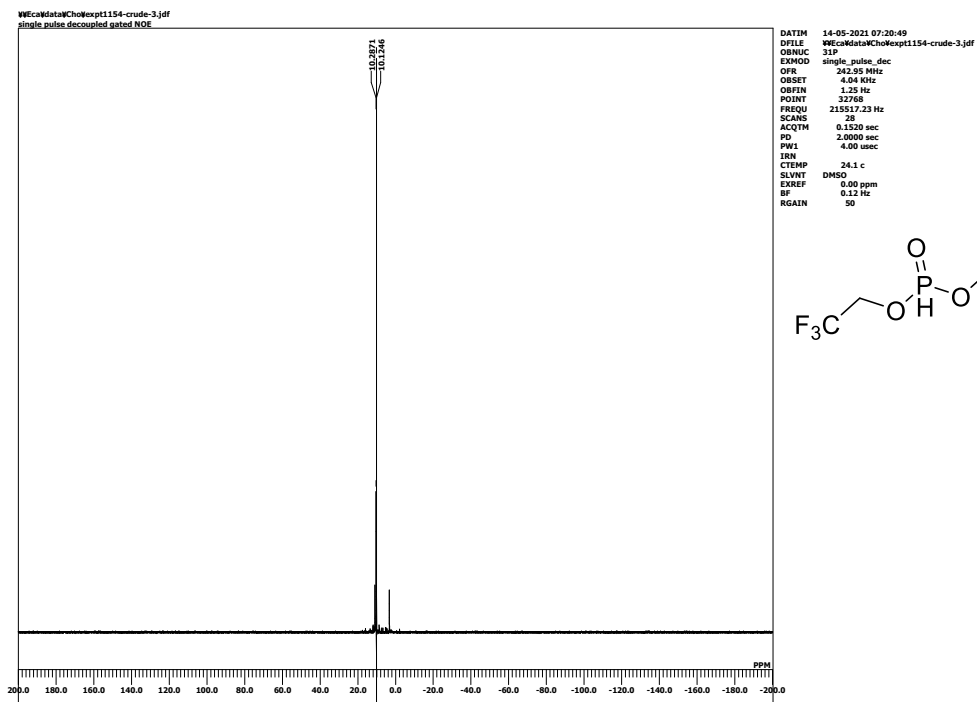

$^{19}\text{F}$  NMR (565 MHz,  $\text{DMSO-}d_6$ ) of **3v**

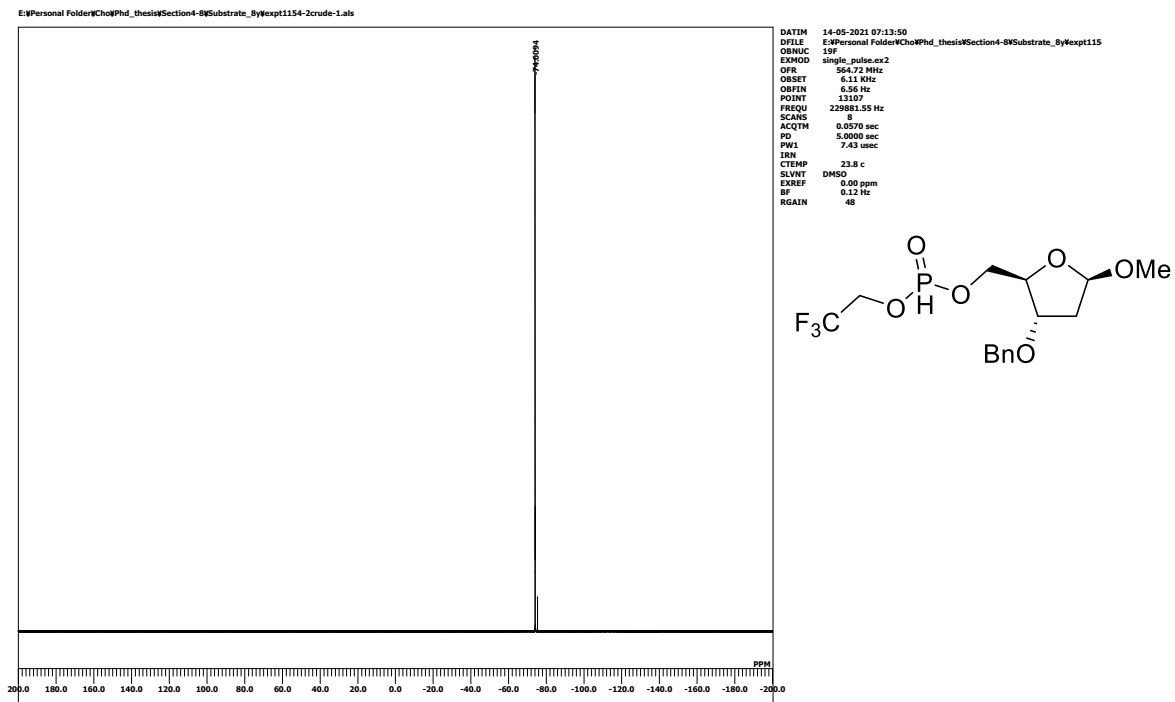

<sup>1</sup>H NMR (600 MHz, DMSO-d<sub>6</sub>) of **3w**

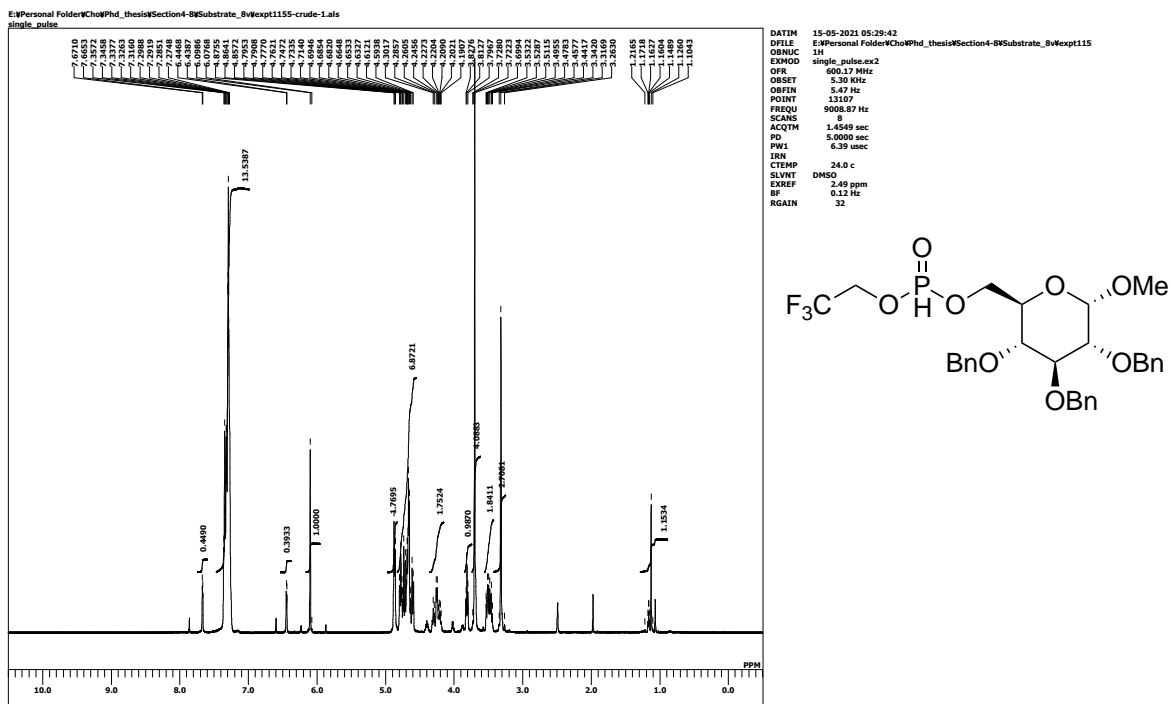

<sup>13</sup>C NMR (151 MHz, DMSO-d<sub>6</sub>) of **3w**

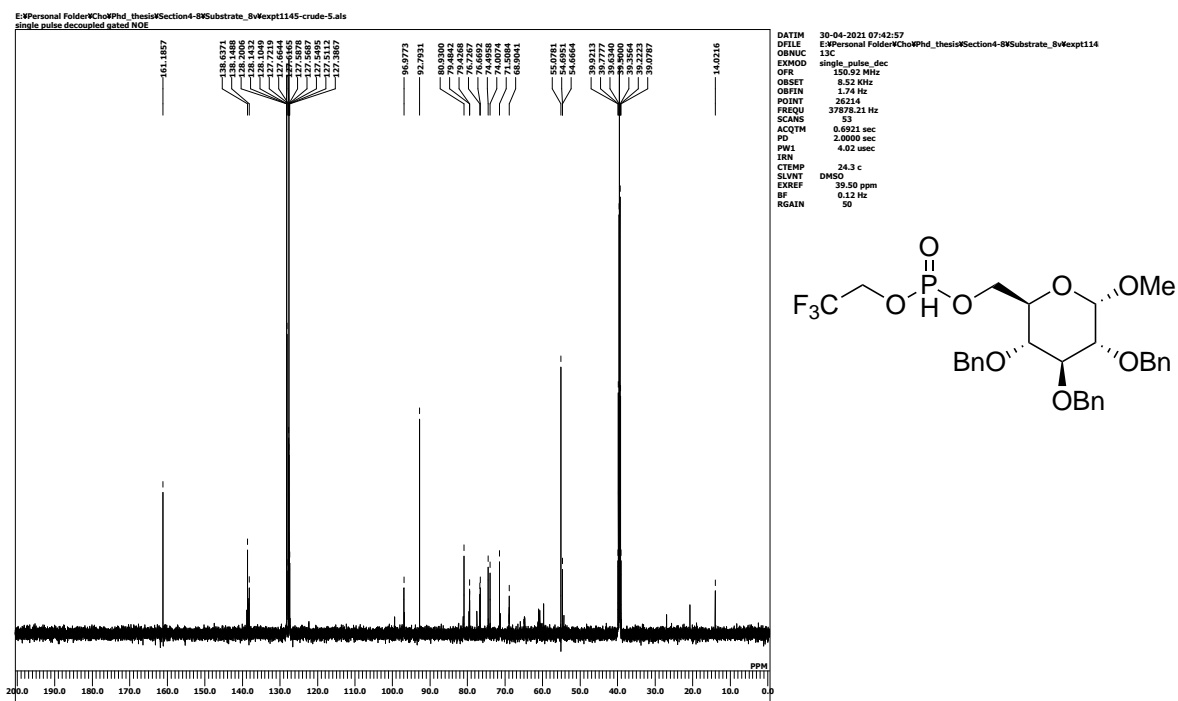

<sup>31</sup>P NMR (243 MHz, DMSO-*d*<sub>6</sub>) of **3w**

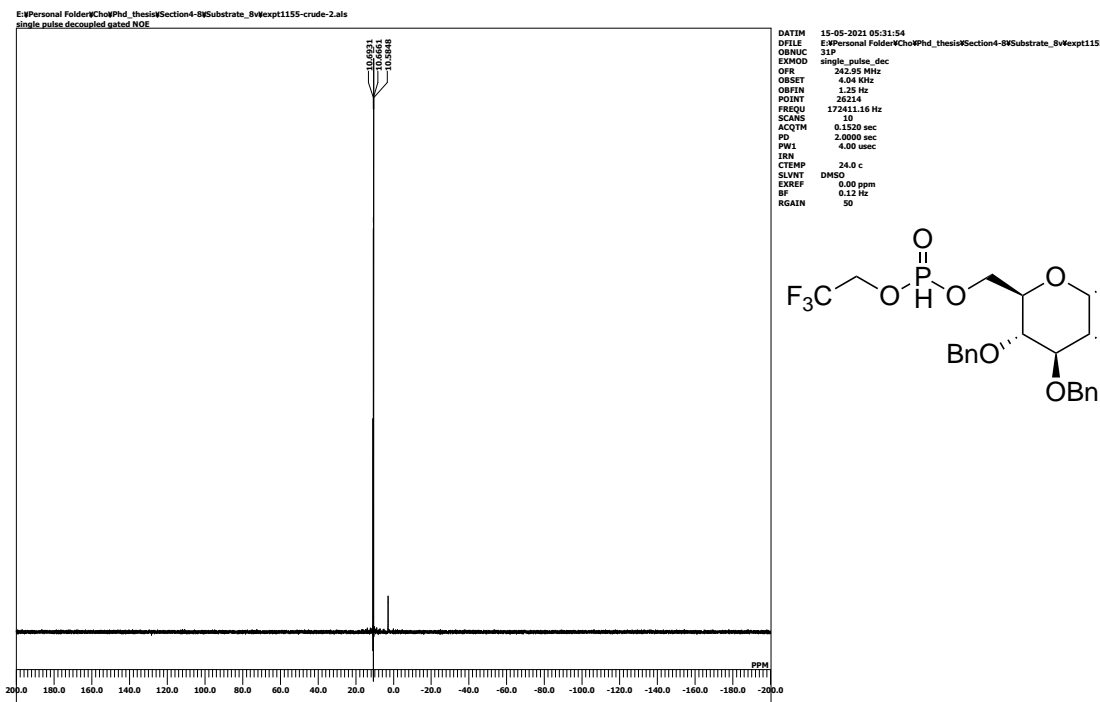

<sup>19</sup>F NMR (565 MHz, DMSO-*d*<sub>6</sub>) of **3w**

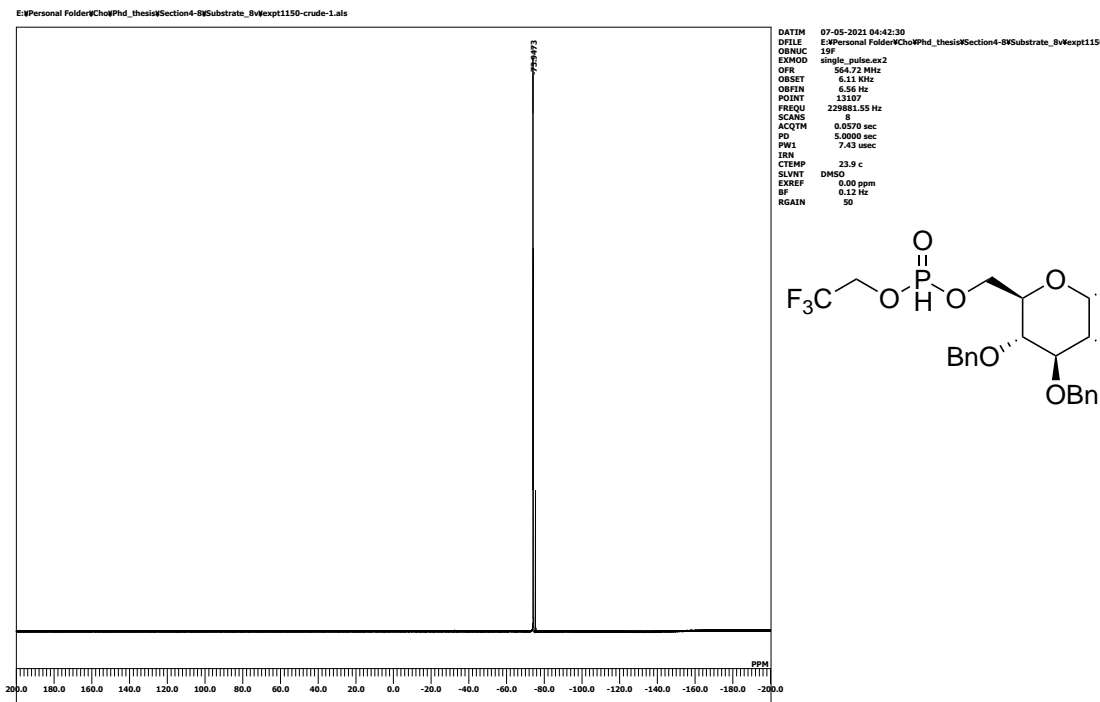

# <sup>1</sup>H NMR (600 MHz, DMSO-d<sub>6</sub>) of 3x

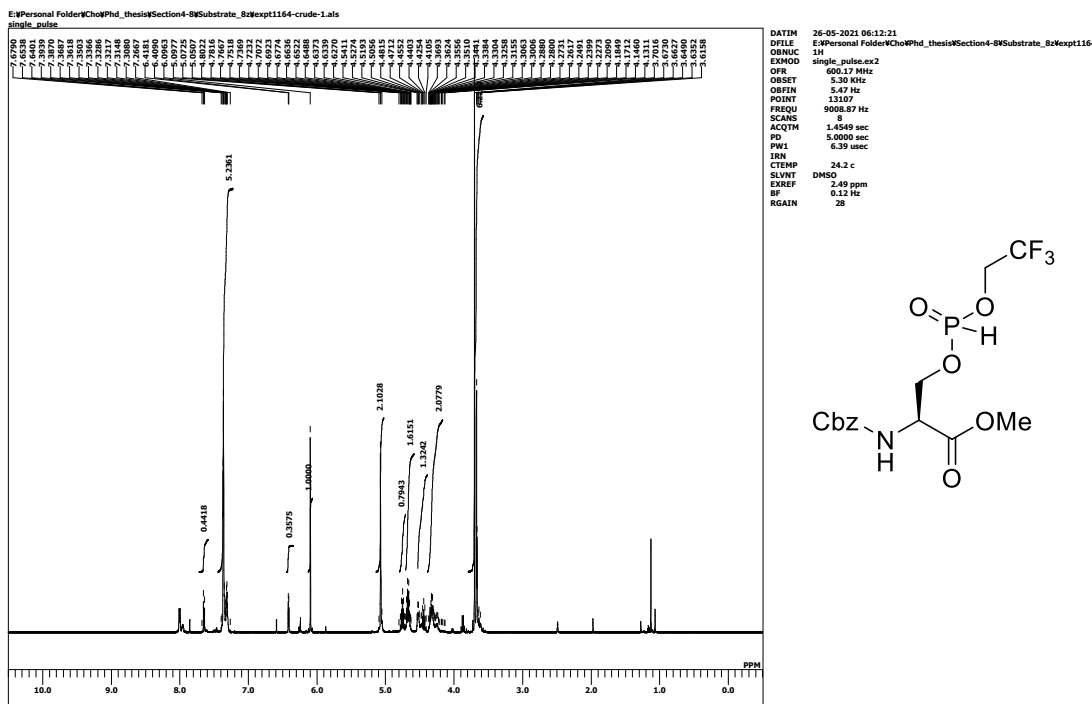

# <sup>13</sup>C NMR (151 MHz, DMSO-d<sub>6</sub>) of 3x

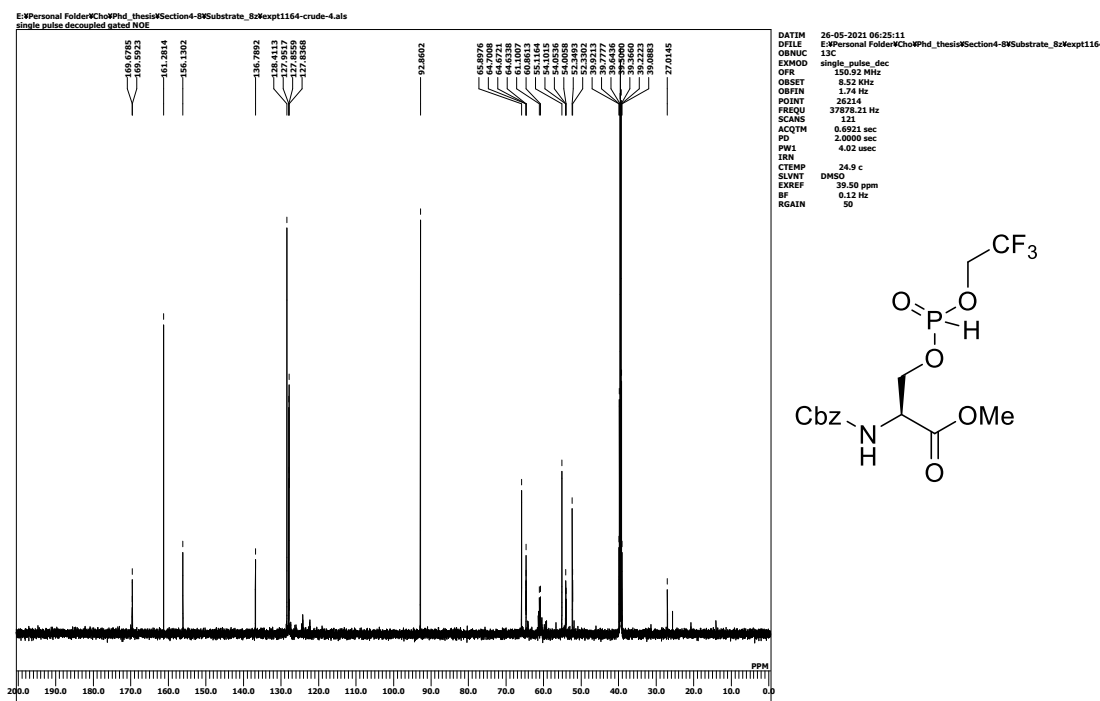

### $^{31}\text{P}$ NMR (243 MHz, $\text{DMSO-}d_6$ ) of **3x**

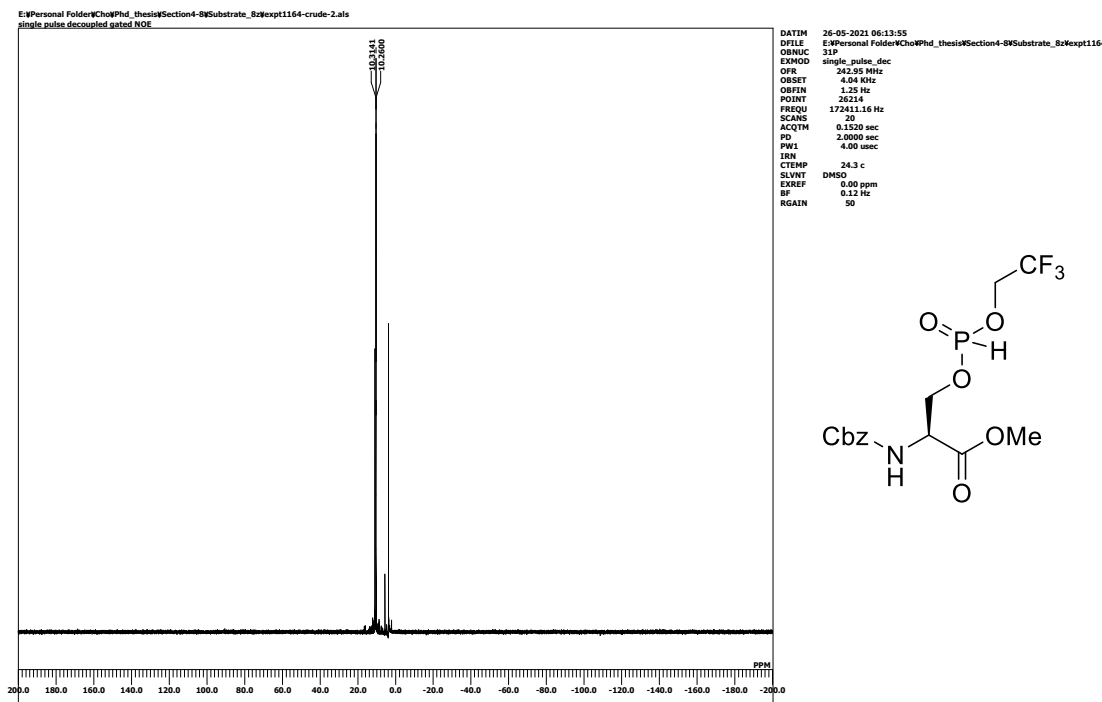

### $^{19}\text{F}$ NMR (565 MHz, $\text{DMSO-}d_6$ ) of **3x**

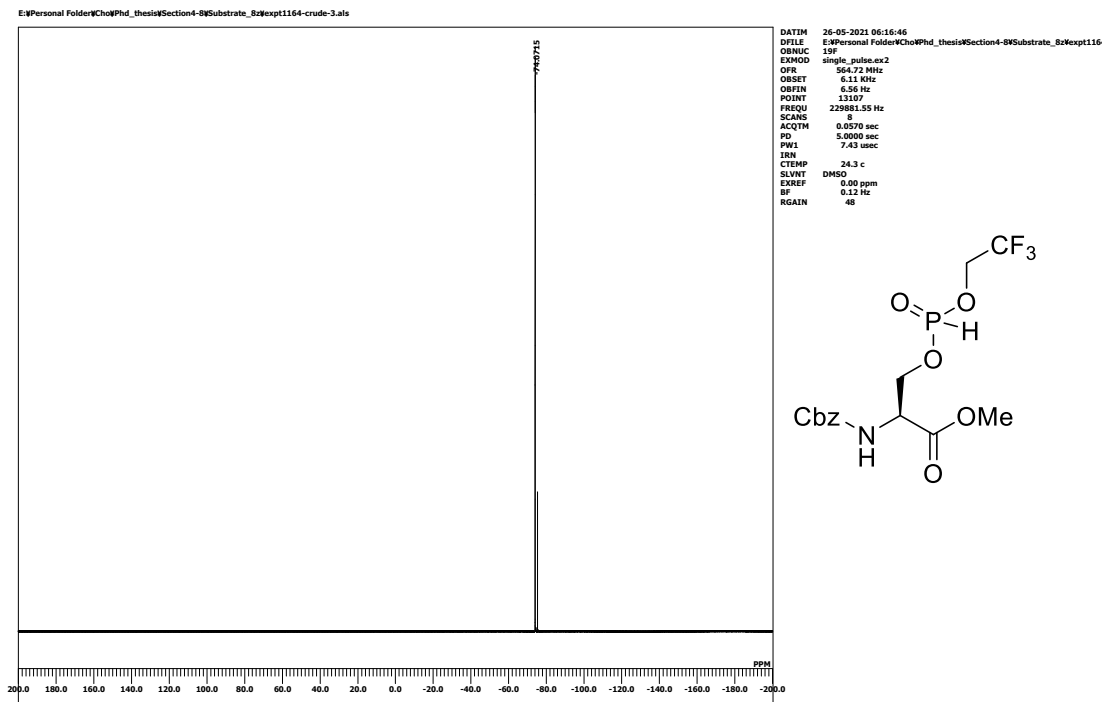

# <sup>1</sup>H NMR (600 MHz, CDCl<sub>3</sub>) of **3y**

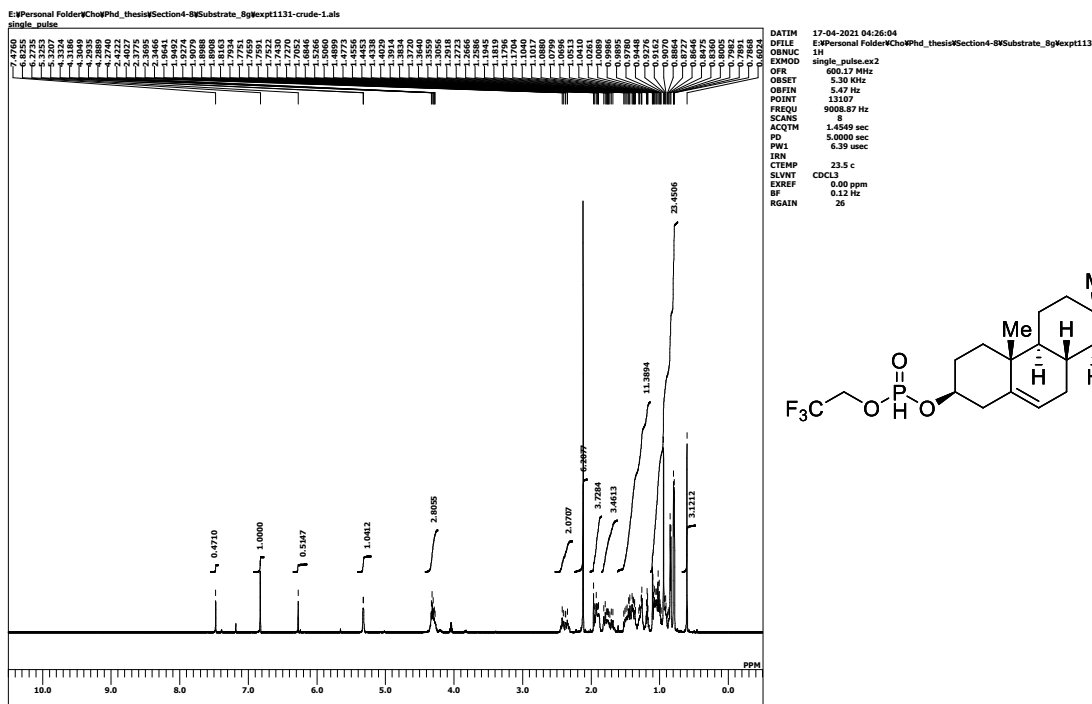



$^{31}\text{P}$  NMR (243 MHz,  $\text{CDCl}_3$ ) of **3y**

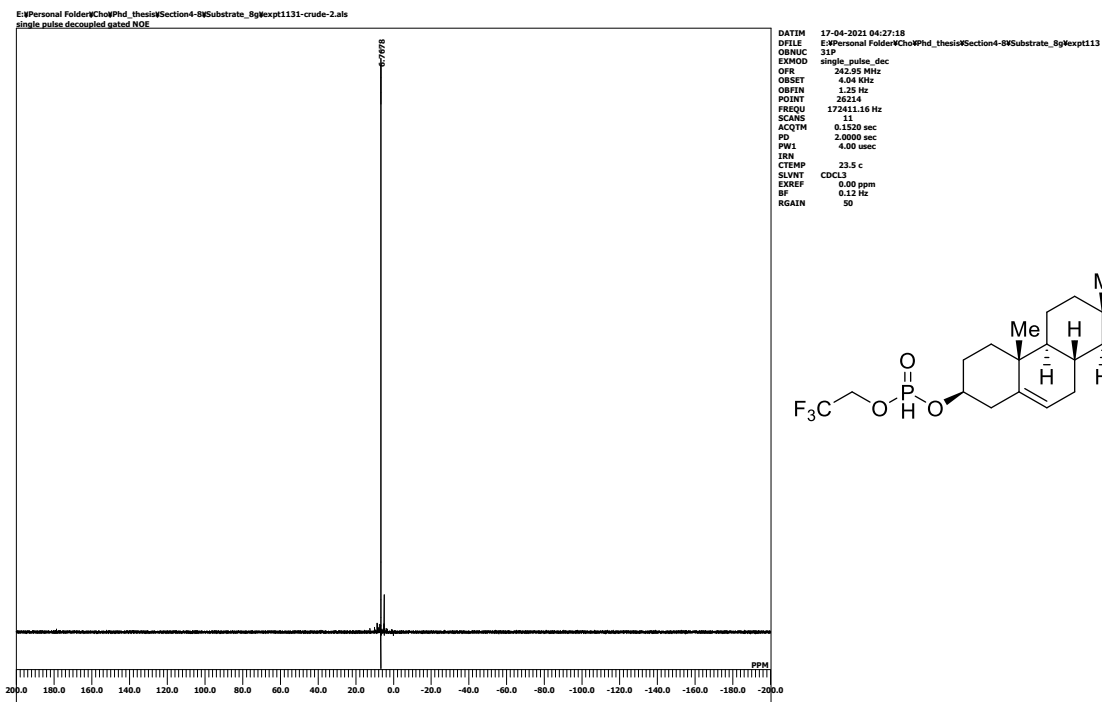

$^{19}\text{F}$  NMR (565 MHz,  $\text{CDCl}_3$ ) of **3y**

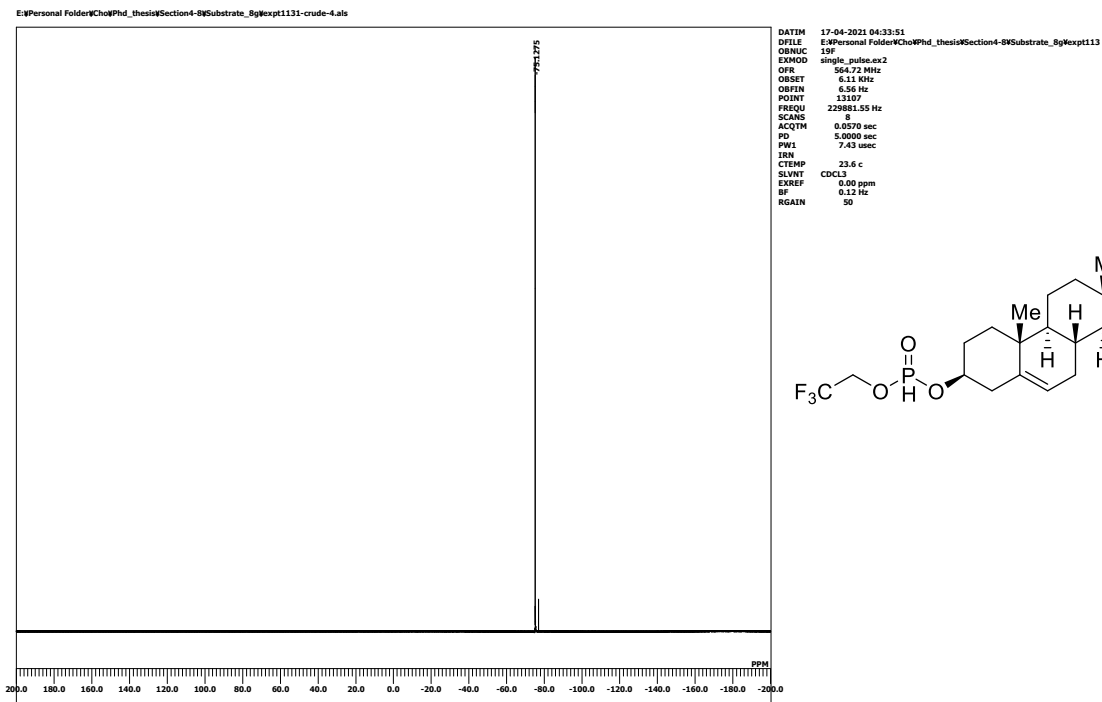



$^{31}\text{P}$  NMR (243 MHz,  $\text{DMSO-}d_6$ ) of **3z**

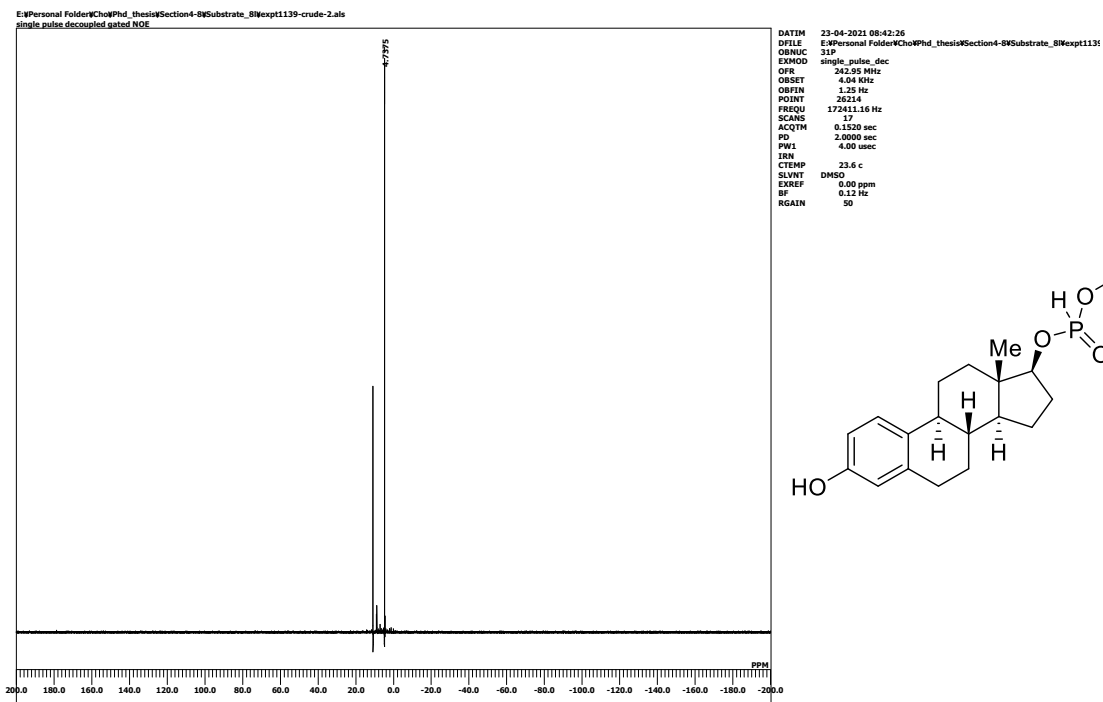

$^{19}\text{F}$  NMR (565 MHz,  $\text{DMSO-}d_6$ ) of **3z**

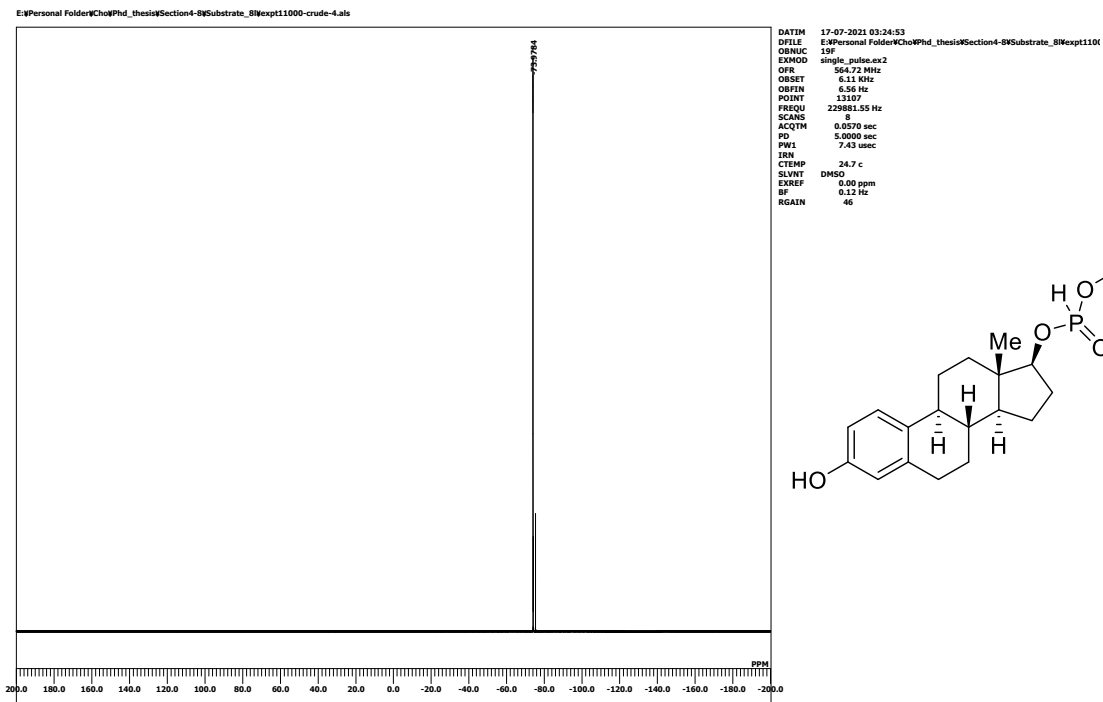

# <sup>1</sup>H NMR (600 MHz, CDCl<sub>3</sub>) of **3aa**

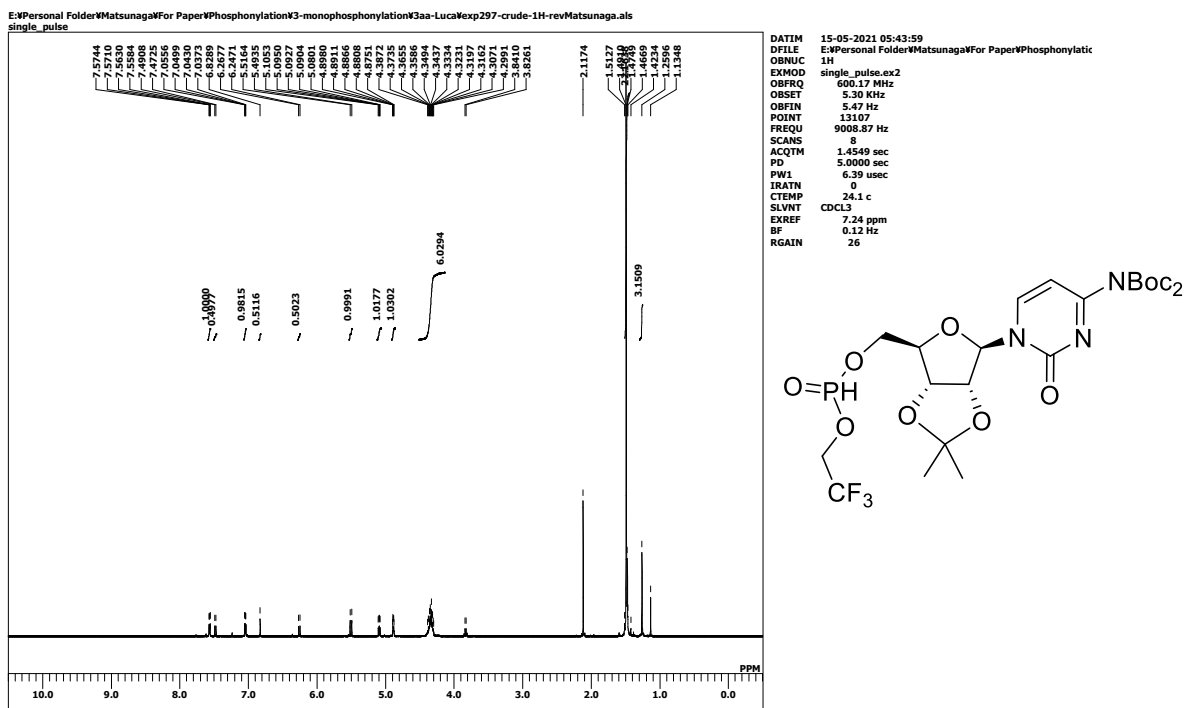

# <sup>13</sup>C NMR (151 MHz, CDCl<sub>3</sub>) of **3aa**

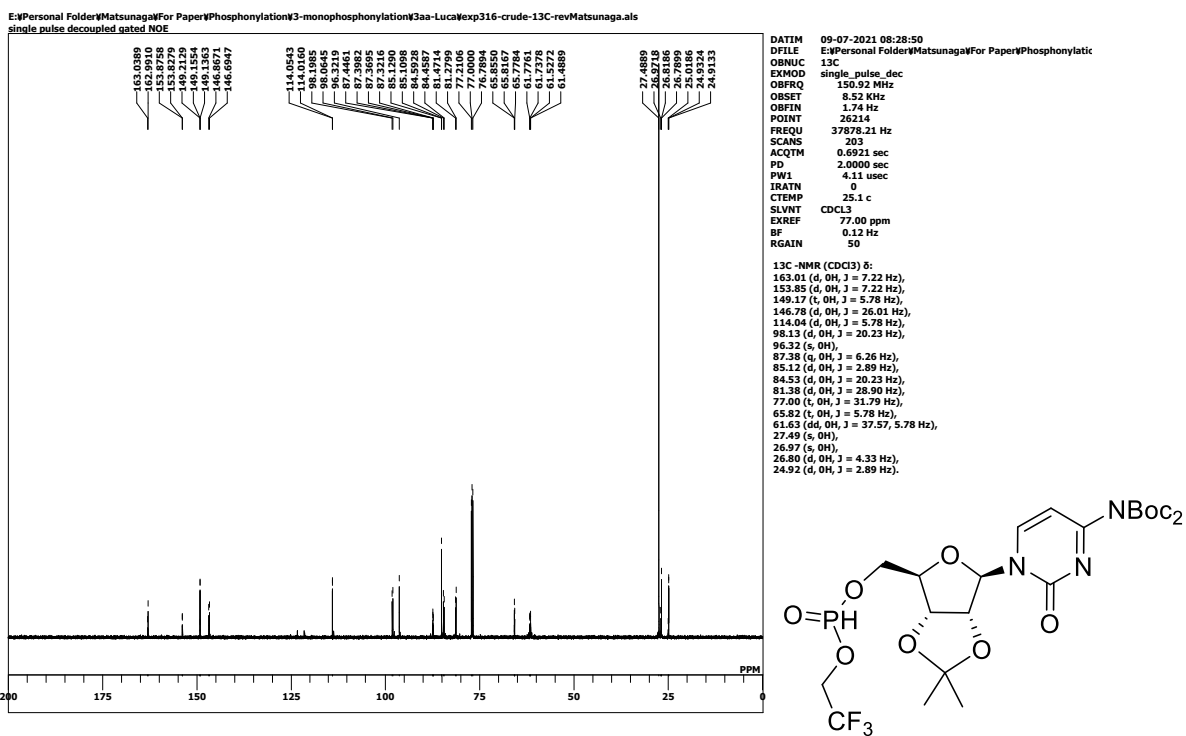

<sup>31</sup>P NMR (243 MHz, CDCl<sub>3</sub>) of **3aa**

E:\Personal Folder\Matsunaga\For Paper\Phosphorylation\3-monophosphorylation\3aa-Luca\exp297-crude-31P-revMatsunaga.als  
single pulse decoupled gated NOE

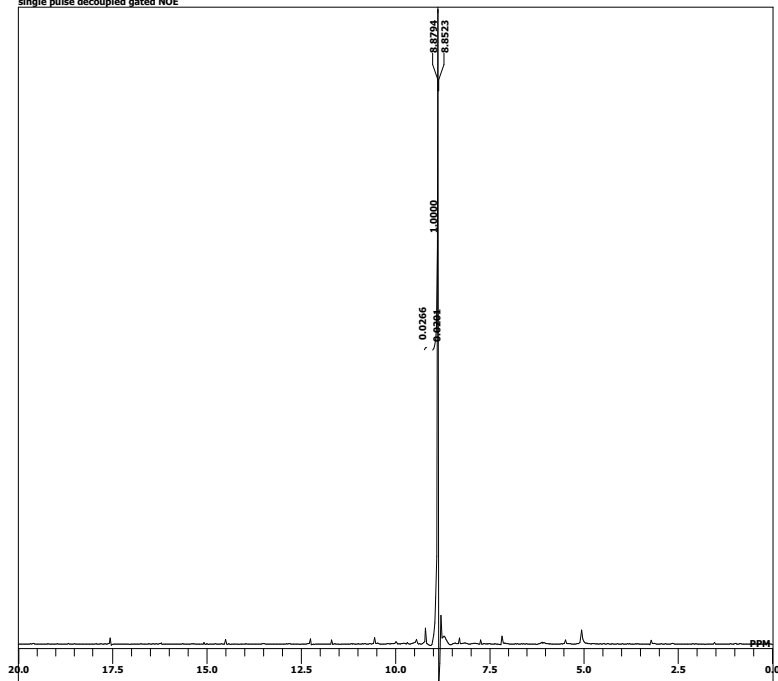

DATIM 15-05-2021 05:47:58  
DFILE E:\Personal Folder\Matsunaga\For Paper\Phosphorylati  
OBNUC 31P  
EXMOD single\_pulse\_dec  
OBFRQ 242.95 MHz  
OBSET 4.04 KHz  
OBFIN 1.25 Hz  
POINT 26214  
FREQU 172411.16 Hz  
SCANS 102  
ACQTM 0.1520 sec  
PD 2.0000 sec  
PW1 4.00 usec  
IRATN 0  
CTEMP 24.6 c  
SLVNT CDCl3  
EXREF 0.00 ppm  
BF 0.12 Hz  
RGAIN 50

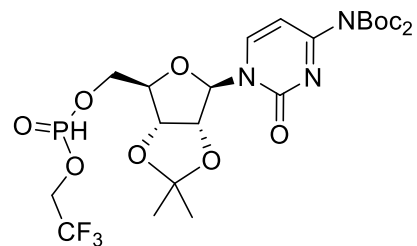

<sup>19</sup>F NMR (565 MHz, CDCl<sub>3</sub>) of **3aa**

E:\Personal Folder\Matsunaga\For Paper\Phosphorylation\3-monophosphorylation\3aa-Luca\exp316-crude-19F-revMatsunaga.als

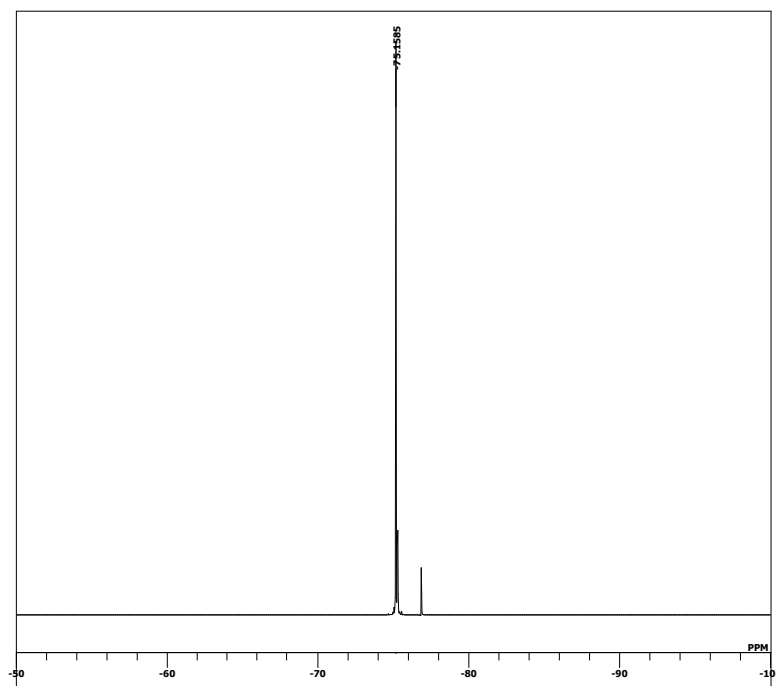

DATIM 09-07-2021 08:18:17  
DFILE E:\Personal Folder\Matsunaga\For Paper\Phosphorylati  
OBNUC 19F  
EXMOD single\_pulse.ex2  
OBFRQ 564.72 MHz  
OBSET 6.11 KHz  
OBFIN 6.56 Hz  
POINT 13107  
FREQU 229881.55 Hz  
SCANS 8  
ACQTM 0.0570 sec  
PD 5.0000 sec  
PW1 7.43 usec  
IRATN 0  
CTEMP 24.3 c  
SLVNT CDCl3  
EXREF 0.00 ppm  
BF 0.12 Hz  
RGAIN 48

<sup>19</sup>F-NMR (CDCl<sub>3</sub>) δ:  
-75.16 (s, 0H).

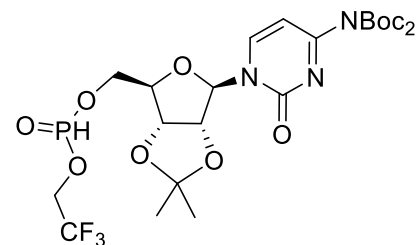

<sup>1</sup>H NMR (600 MHz, CDCl<sub>3</sub>) of **3ab**

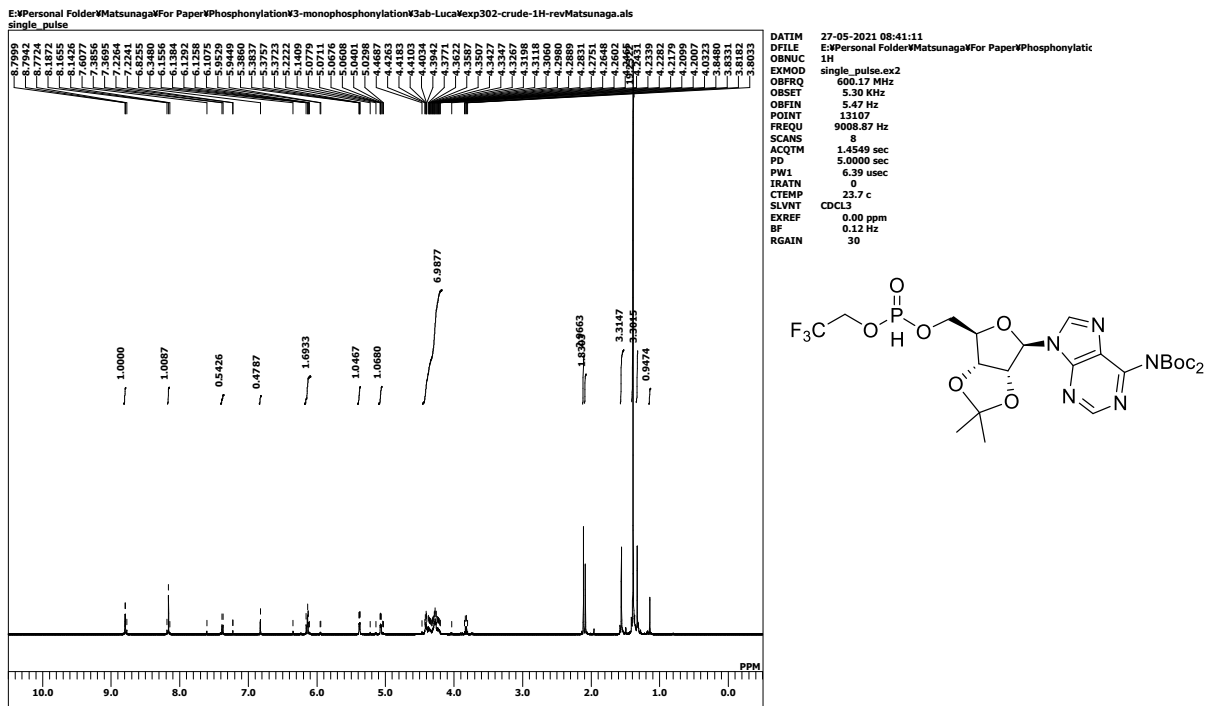

<sup>31</sup>P NMR (243 MHz, CDCl<sub>3</sub>) of **3ab**

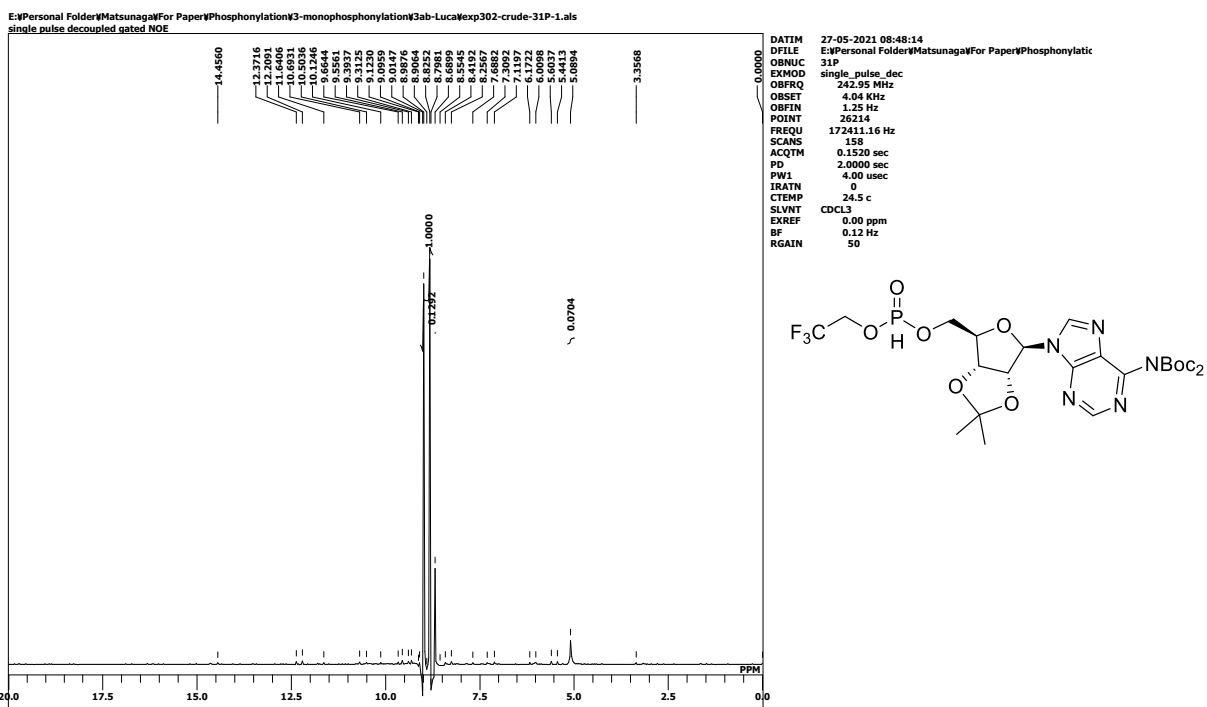



### <sup>31</sup>P NMR (243 MHz, CDCl<sub>3</sub>) of **3ac**

E:\Personal Folder\Matsunaga\For Paper\Phosphorylation\3-monophosphorylation\3ac-Luca\exp299-crude-31P-revMatsunaga.als  
single pulse decoupled gated NOE

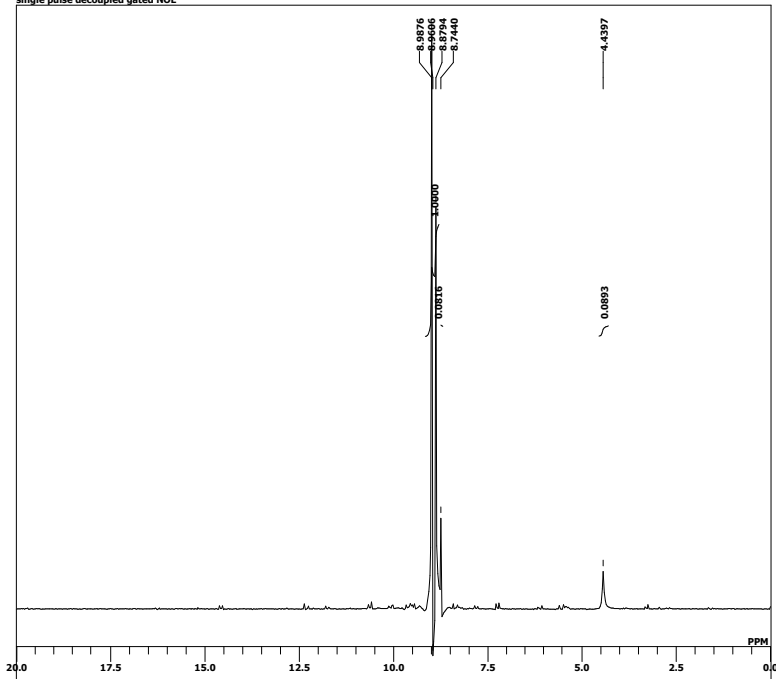

DATIM 20-05-2021 05:43:17  
DFILE E:\Personal Folder\Matsunaga\For Paper\Phosphorylation\3-monophosphorylation\3ac-Luca\exp299-crude-31P-revMatsunaga.als  
OBNUC 31P  
EXMOD single\_pulse\_dec  
OBFRQ 242.95 MHz  
OBSET 4.04 KHz  
OBFIN 1.25 Hz  
POINT 26214  
FREQU 172411.16 Hz  
SCANS 73  
ACQTM 0.1520 sec  
PD 2.0000 sec  
PW1 4.00 usec  
IRATN 0  
CTEMP 24.4 c  
SLVNT CDCl3  
EXREF 0.00 ppm  
BF 0.12 Hz  
RGAIN 50

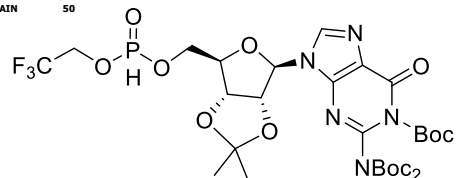

### <sup>19</sup>F NMR (565 MHz, CDCl<sub>3</sub>) of **3ac**

E:\Personal Folder\Matsunaga\For Paper\Phosphorylation\3-monophosphorylation\3ac-Luca\exp317-crude-19F-revMatsunaga.als

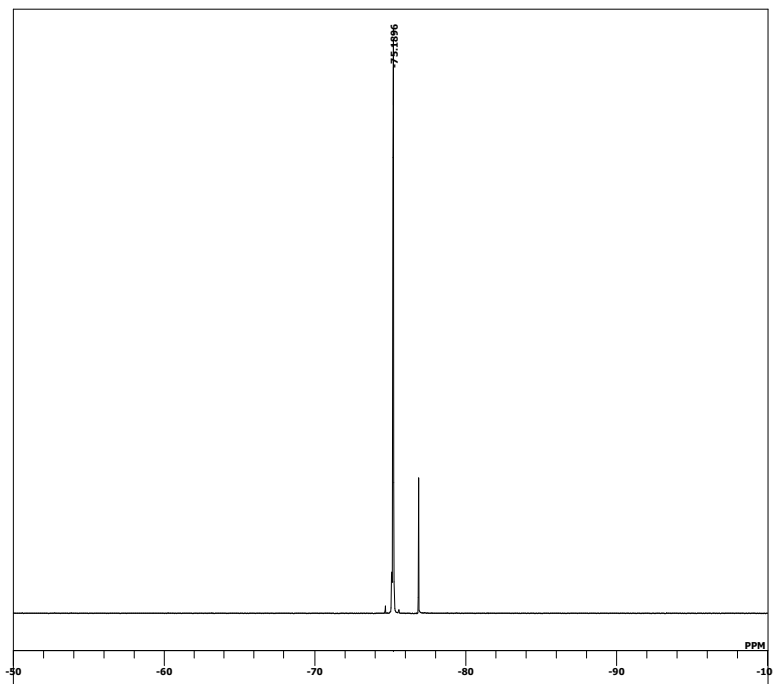

DATIM 09-07-2021 08:38:43  
DFILE E:\Personal Folder\Matsunaga\For Paper\Phosphorylation\3-monophosphorylation\3ac-Luca\exp317-crude-19F-revMatsunaga.als  
OBNUC 19F  
EXMOD single\_pulse.ex2  
OBFRQ 564.72 MHz  
OBSET 6.11 KHz  
OBFIN 6.56 Hz  
POINT 13107  
FREQU 229881.55 Hz  
SCANS 8  
ACQTM 0.0570 sec  
PD 5.0000 sec  
PW1 7.43 usec  
IRATN 0  
CTEMP 24.5 c  
SLVNT CDCl3  
EXREF 0.00 ppm  
BF 0.12 Hz  
RGAIN 50

<sup>19</sup>F-NMR (CDCl<sub>3</sub>) δ:

-75.19 (s, 0H).

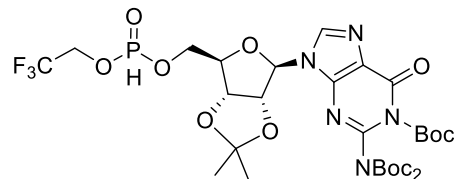



# <sup>1</sup>H NMR (600 MHz, CDCl<sub>3</sub>) of 4a

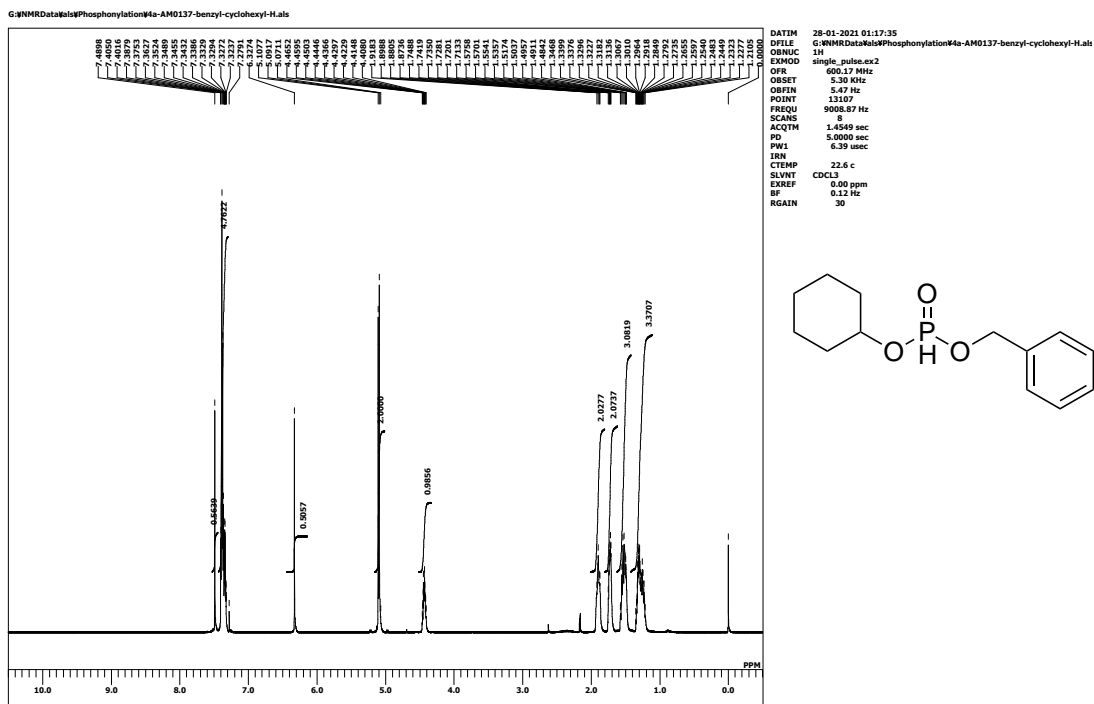

# <sup>13</sup>C NMR (151 MHz, CDCl<sub>3</sub>) of 4a

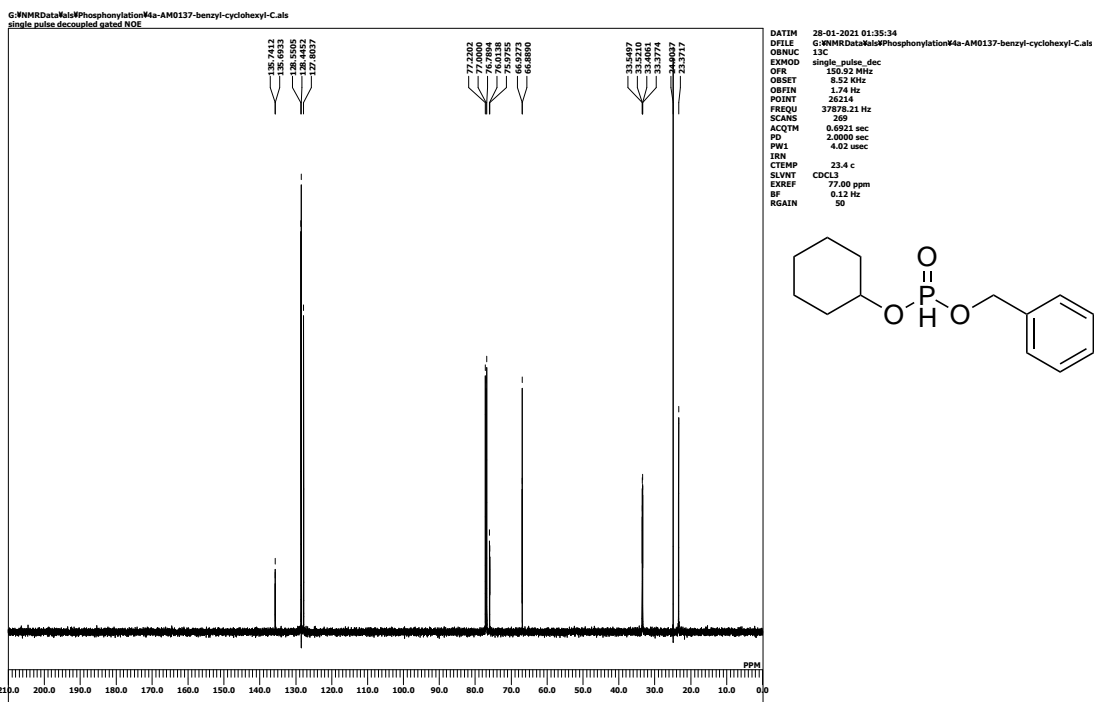

$^{31}\text{P}$  NMR (243 MHz,  $\text{CDCl}_3$ ) of **4a**

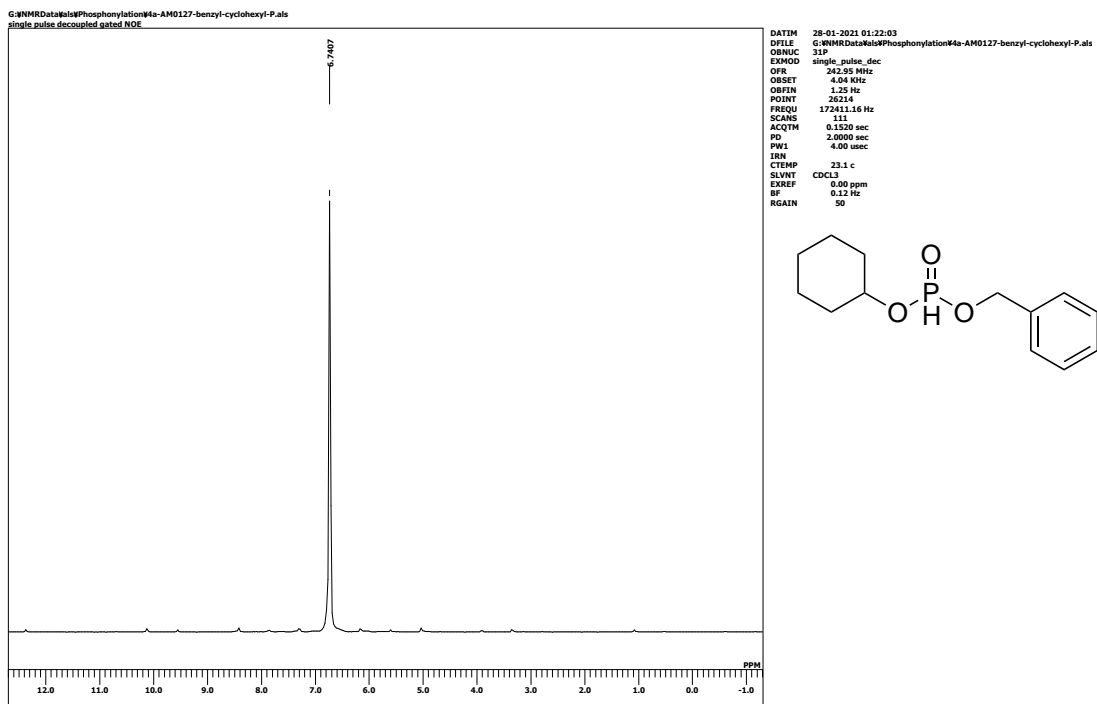



$^{31}\text{P}$  NMR (243 MHz,  $\text{CDCl}_3$ ) of **4b**

E:\Personal Folder\Cho\Phd\_thesis\Section5-5\substrate\_4a\expt1112-isolated3rd-2.a1s  
single pulse decoupled gated NDE

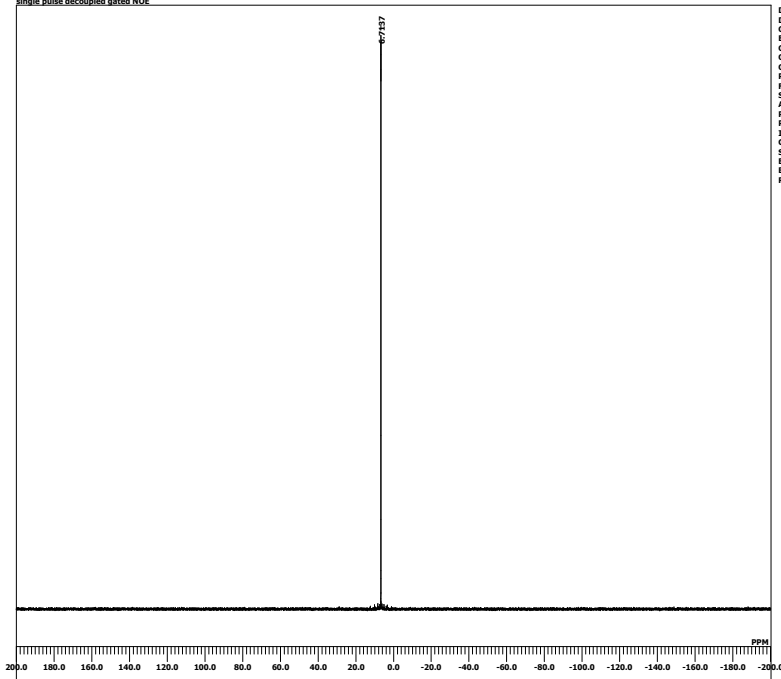

DATIM 10-03-2021 19:57:28  
DFILE E:\Personal Folder\Cho\Phd\_thesis\Section5-5\substrate\_4a\expt1112  
ORNUC  $^{31}\text{P}$   
EXMOD single\_pulse\_dec  
GPR 242.95 MHz  
OBSET 4.04 KHz  
OBFIN 1.25 Hz  
POINT 25214  
FREQU 172411.16 Hz  
SCANS 20  
AQTM 0.1520 sec  
PD 2.0000 sec  
PWL 4.00 sec  
IRN  
CTEMP 23.3 c  
SLVNT  $\text{CDCl}_3$   
EXREF 0.00 ppm  
BF 0.12 Hz  
RGAIN 50

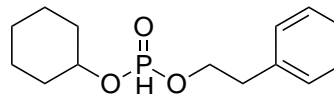



$^{31}\text{P}$  NMR (200 MHz,  $\text{CDCl}_3$ ) of **4c**

G:\NMRData\als\Phosphorylation\4c-AM0157-phenylpropyl-cyclohexyl-P.als

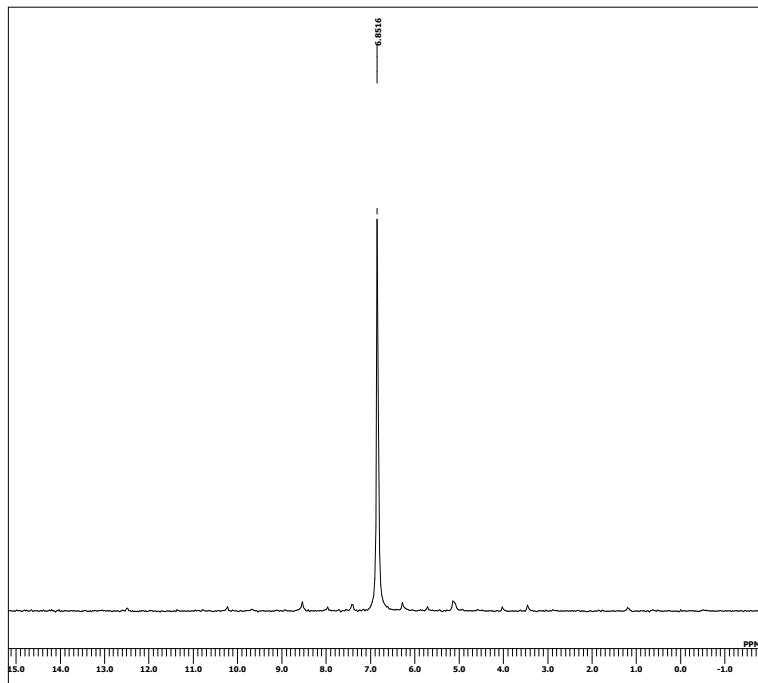

DATIM 27-03-2021 19:09:49  
DIFILE G:\NMRData\als\Phosphorylation\4c-AM0157-phenylpropyl-cyclohex  
ORNUC 31P  
EXMOD single\_pulse\_dec  
QPR 200.43 MHz  
OBSET 2.93 KHz  
OBFIN 9.89 Hz  
POINT 25214  
FREQU 142854.95 Hz  
SCANS 54  
AQTM 0.1835 sec  
PD 2.0000 sec  
PWS 3.40 sec  
IRN  
CTEMP 24.3 c  
SLVNT  $\text{CDCl}_3$   
EXREF 0.00 ppm  
BF 0.12 Hz  
RGAIN 50

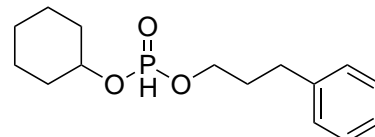

<sup>1</sup>H NMR (600 MHz, CDCl<sub>3</sub>) of **4d**

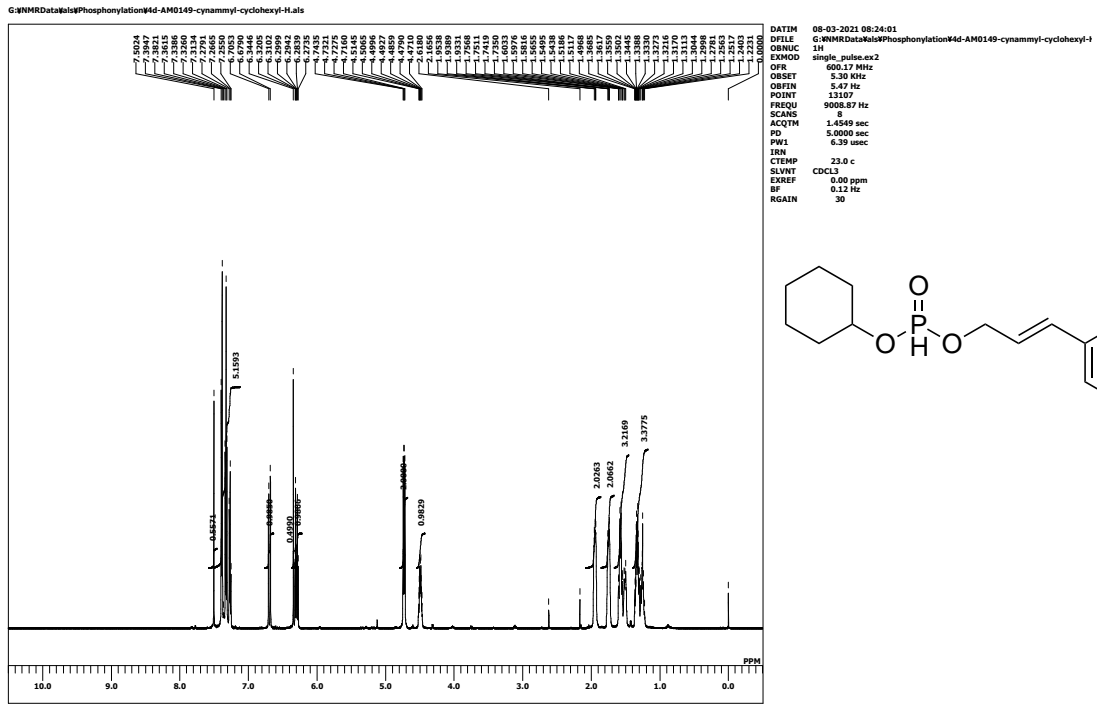

<sup>13</sup>C NMR (151 MHz, CDCl<sub>3</sub>) of **4d**

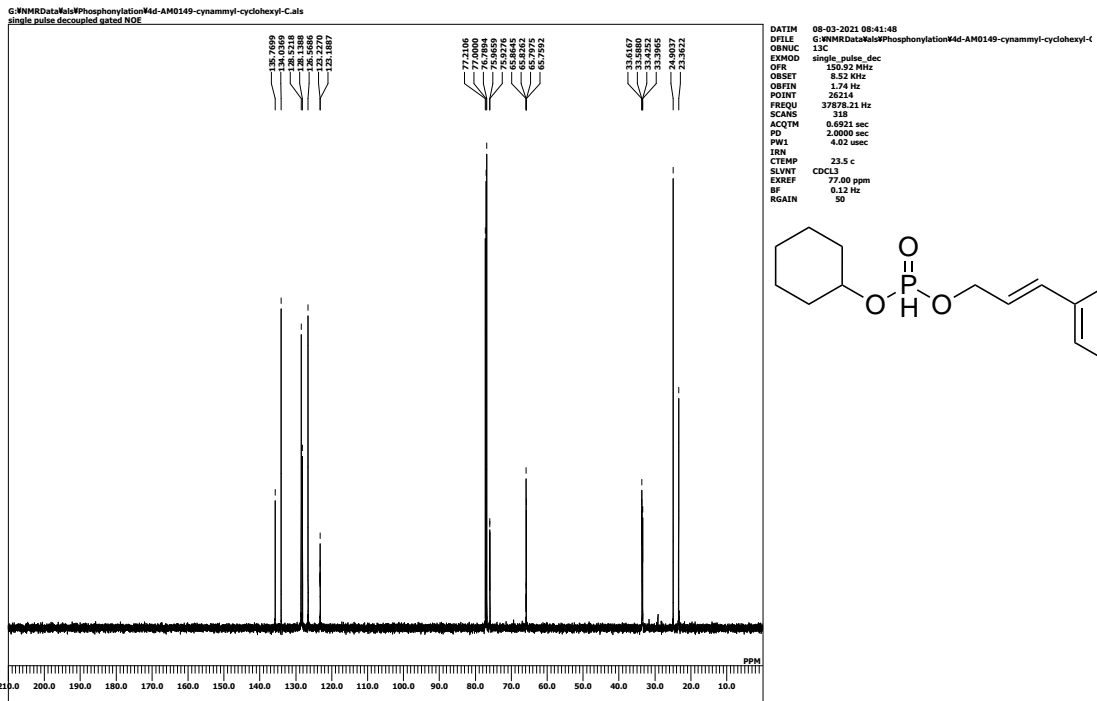

$^{31}\text{P}$  NMR (243 MHz,  $\text{CDCl}_3$ ) of **4d**

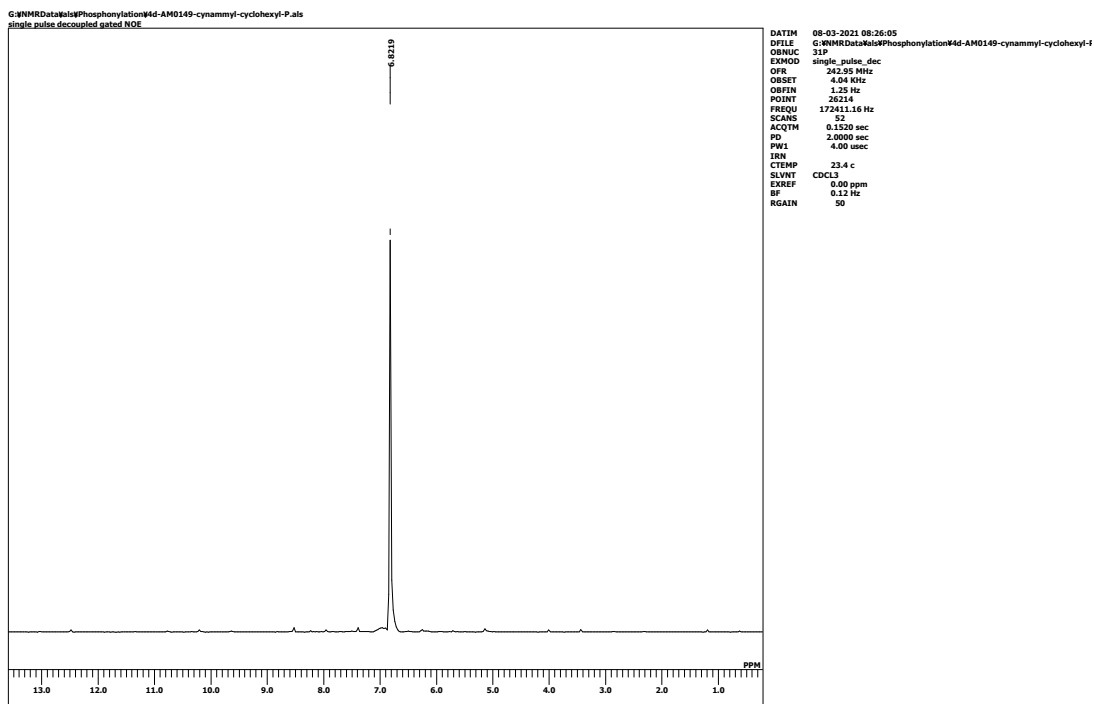



# <sup>1</sup>H NMR (600 MHz, CDCl<sub>3</sub>) of 4e

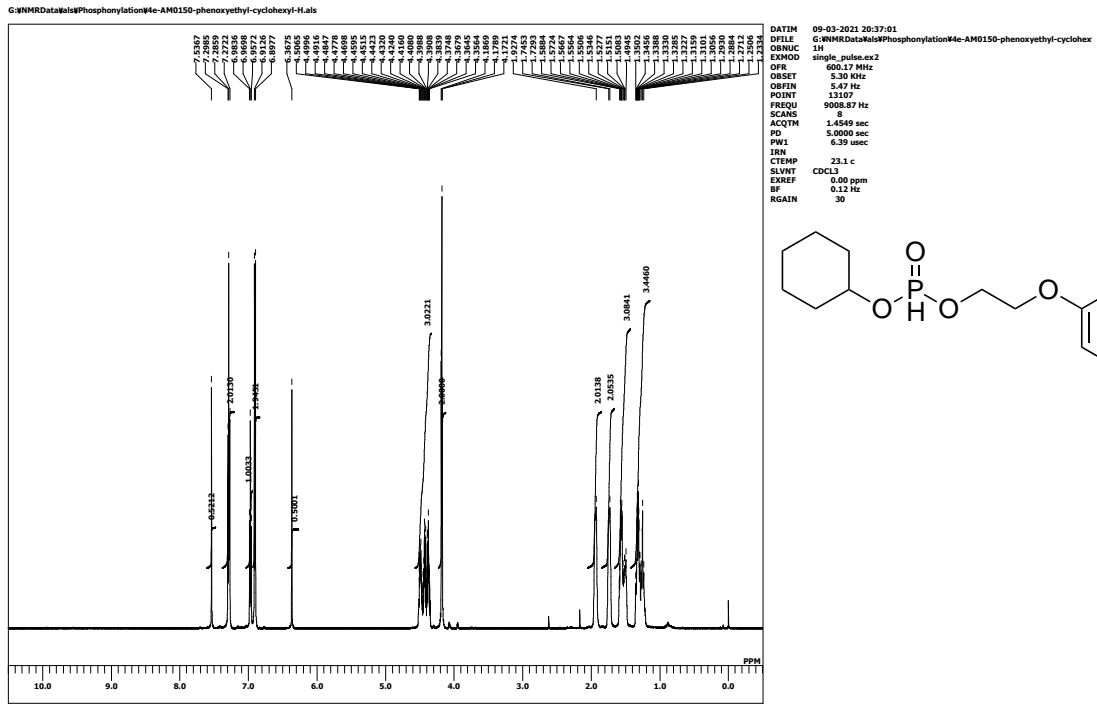

# <sup>13</sup>C NMR (151 MHz, CDCl<sub>3</sub>) of 4e

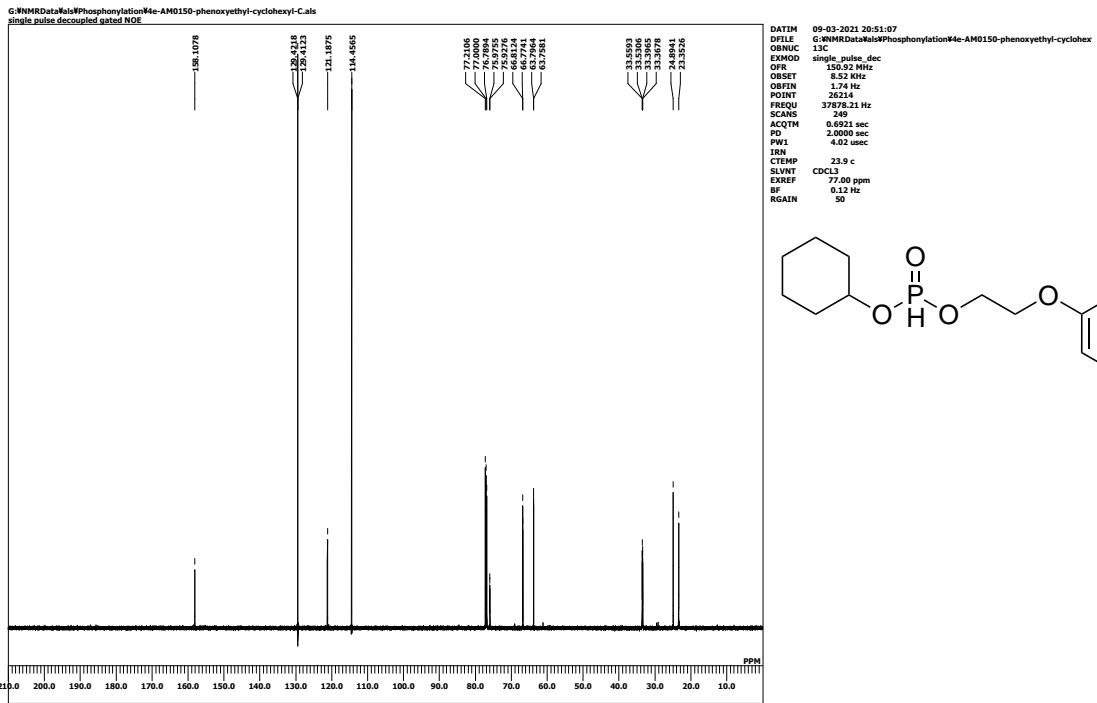

$^{31}\text{P}$  NMR (243 MHz,  $\text{CDCl}_3$ ) of **4e**

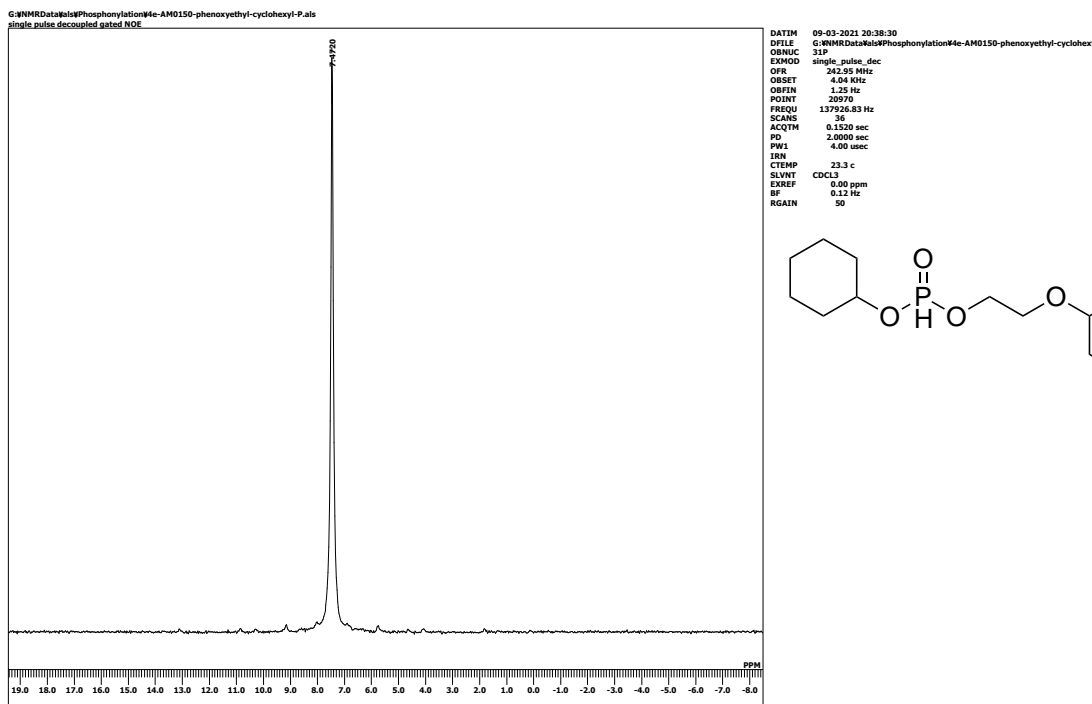

<sup>1</sup>H NMR (600 MHz, CDCl<sub>3</sub>) of **4f**

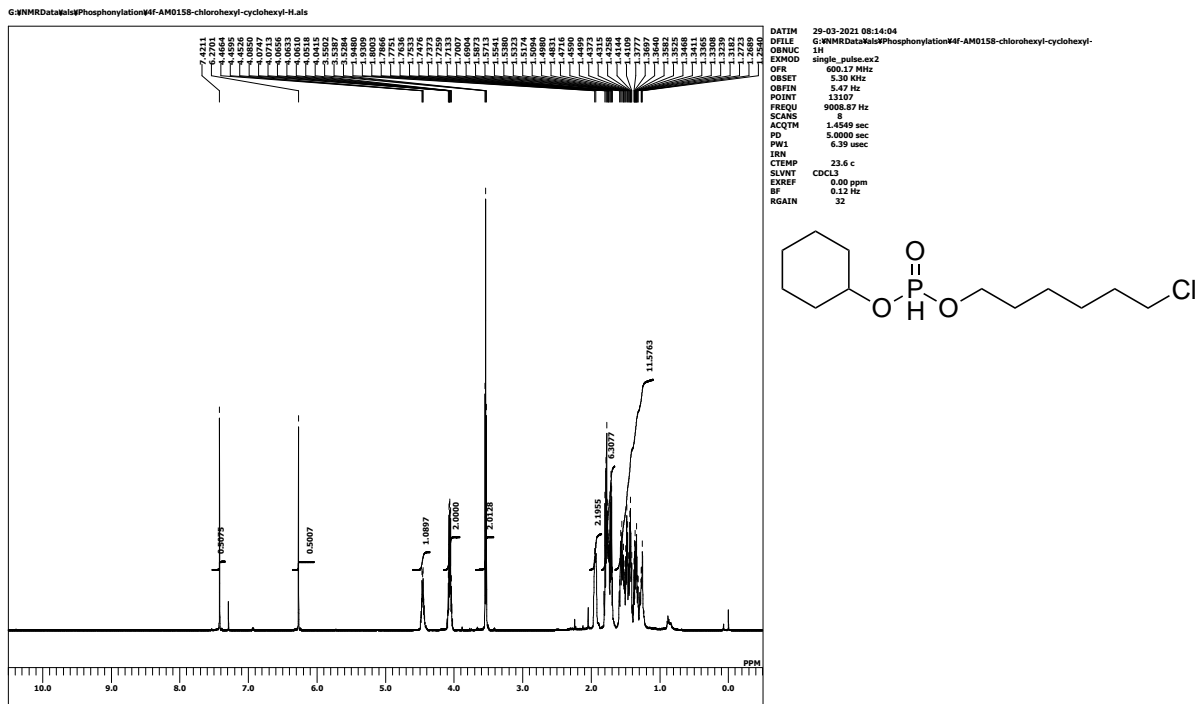

<sup>13</sup>C NMR (151 MHz, CDCl<sub>3</sub>) of **4f**

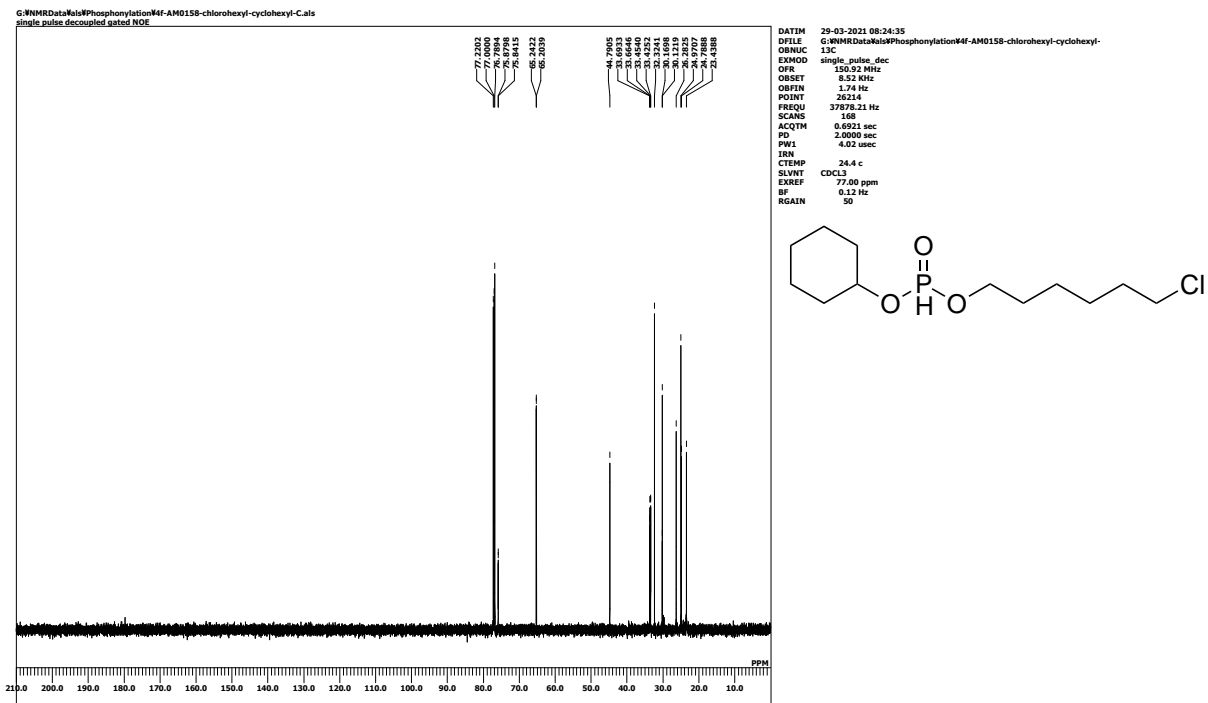

$^{31}\text{P}$  NMR (243 MHz,  $\text{CDCl}_3$ ) of **4f**

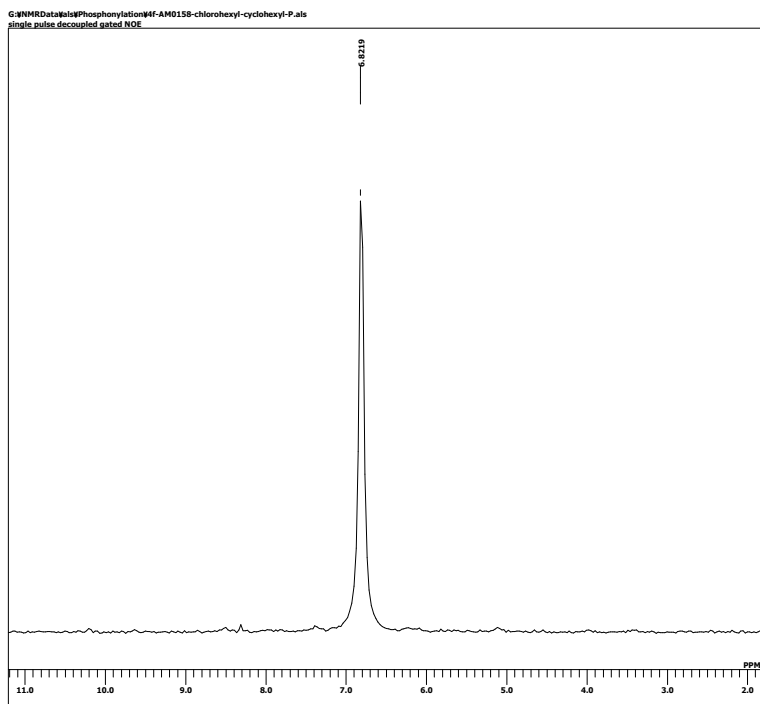

DATIM 29-03-2021 08:15:37  
DZFILE G:\NMRData\als\Phosphorylation\4f-AM0158-chlorohexyl-cyclohexyl-  
ORNUC 31P  
EXMOD single\_pulse\_dec  
GPR 242.95 MHz  
OBSET 4.04 KHz  
OBFIN 1.25 Hz  
POINT 25214  
FREQU 172411.16 Hz  
SCANS 20  
AQTM 0.1520 sec  
PD 2.0000 sec  
PWL 4.00 sec  
IRN  
CTEMP 23.9 c  
SLVNT  $\text{CDCl}_3$   
EXREF 0.00 ppm  
BF 0.12 Hz  
RGAIN 54

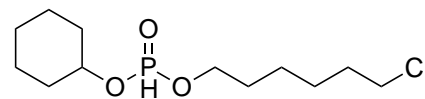

<sup>1</sup>H NMR (600 MHz, CDCl<sub>3</sub>) of **4g**

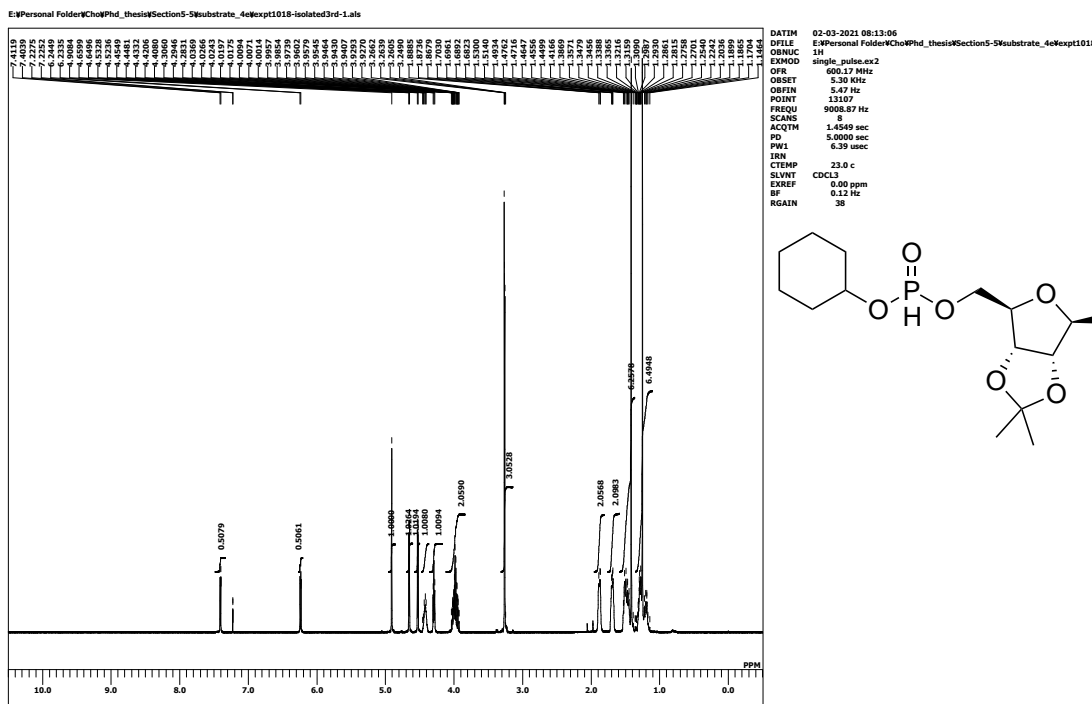

<sup>13</sup>C NMR (151 MHz, CDCl<sub>3</sub>) of **4a**

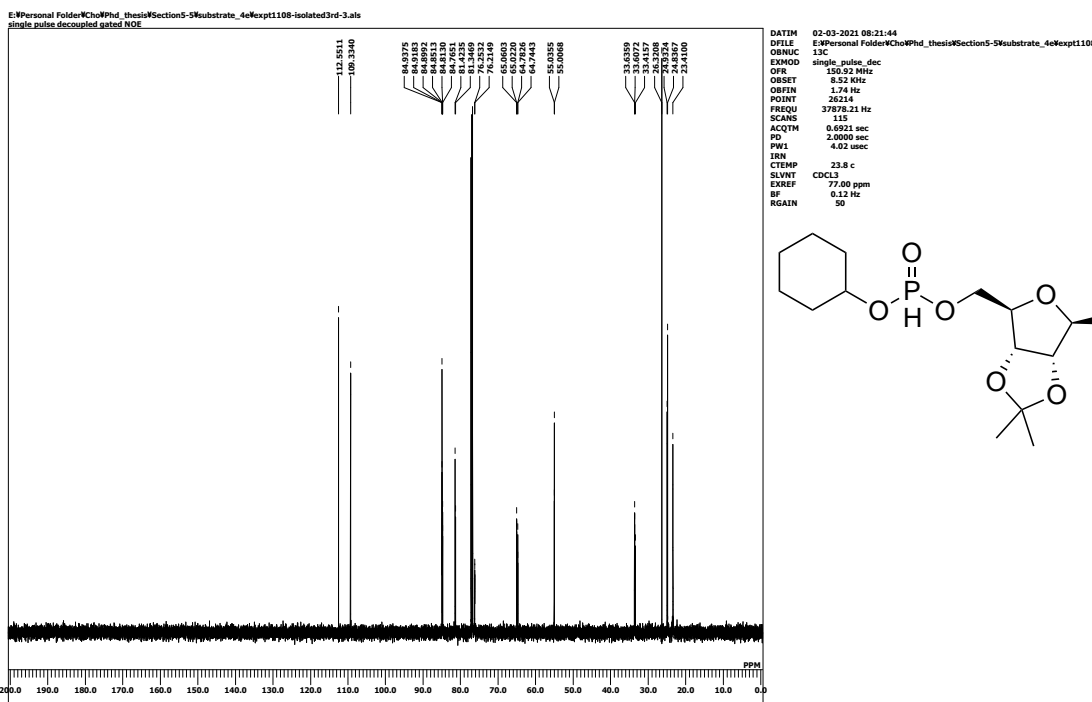

$^{31}\text{P}$  NMR (243 MHz,  $\text{CDCl}_3$ ) of **4g**

E:\Personal Folder\Cho\Phd\_thesis\Section5-5\substrate\_4e\expt1018-isolated3rd-2.als  
single pulse decoupled gated NDE

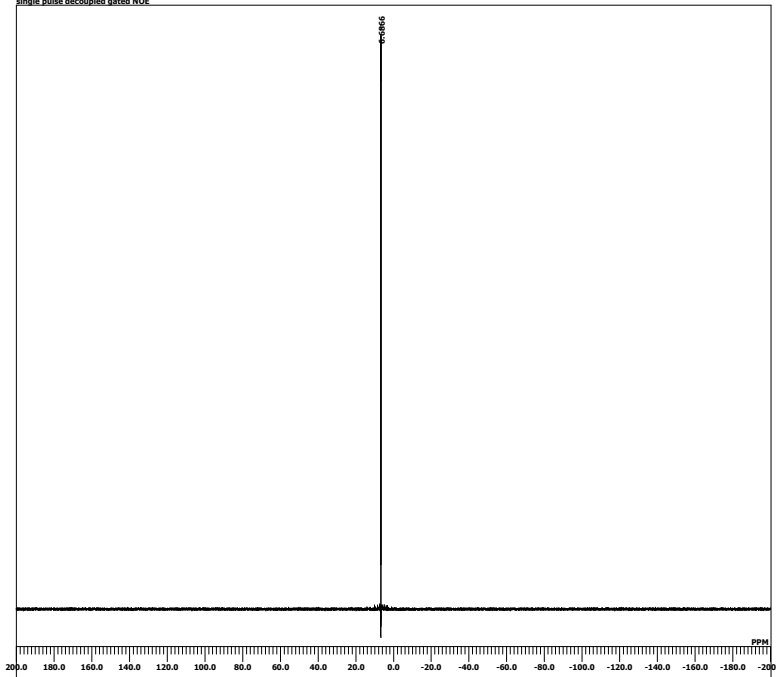

DATIM 02-03-2021 08:14:43  
DZFILE E:\Personal Folder\Cho\Phd\_thesis\Section5-5\substrate\_4e\expt1018  
ORNUC  $^{31}\text{P}$   
EXMOD single\_pulse\_dec  
GPR 242.95 MHz  
OBSET 4.04 KHz  
OBFIN 1.25 Hz  
POINT 25214  
FREQU 172411.16 Hz  
SCANS 21  
AQTM 0.1520 sec  
PD 2.0000 sec  
PWL 4.00 sec  
IRN  
CTEMP 23.1 c  
SLVNT  $\text{CDCl}_3$   
EXREF 0.00 ppm  
BF 0.12 Hz  
RGAIN 50

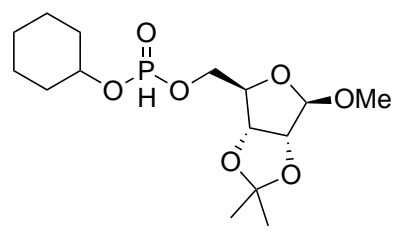

<sup>1</sup>H NMR (600 MHz, CDCl<sub>3</sub>) of **4h**

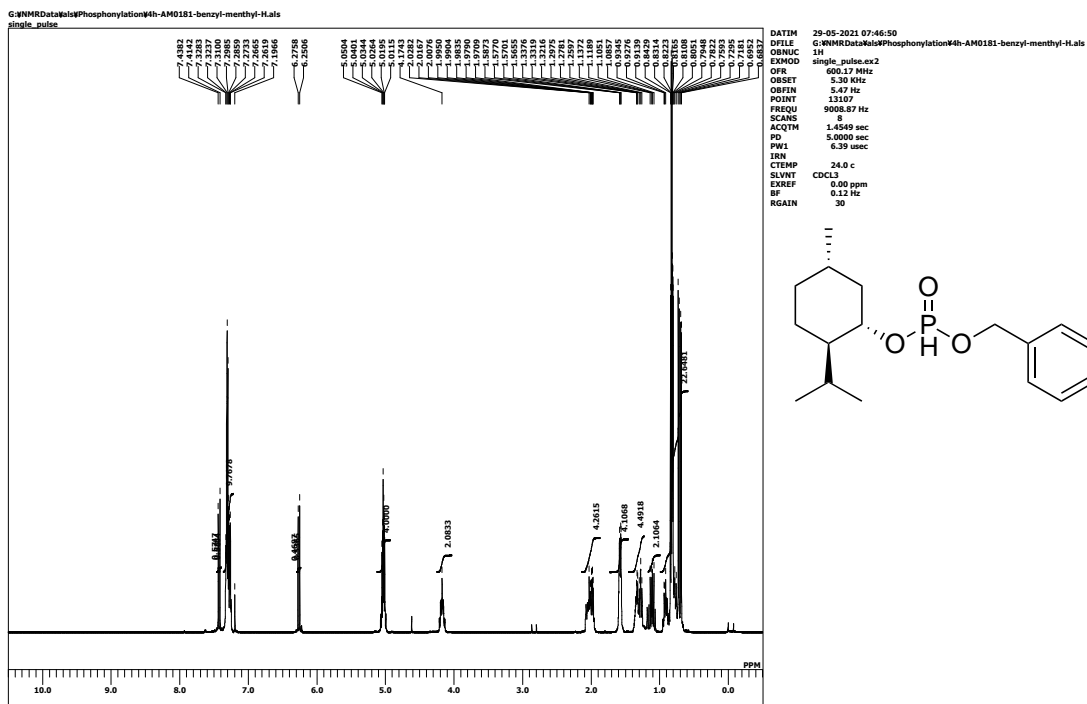

<sup>13</sup>C NMR (151 MHz, CDCl<sub>3</sub>) of **4h**

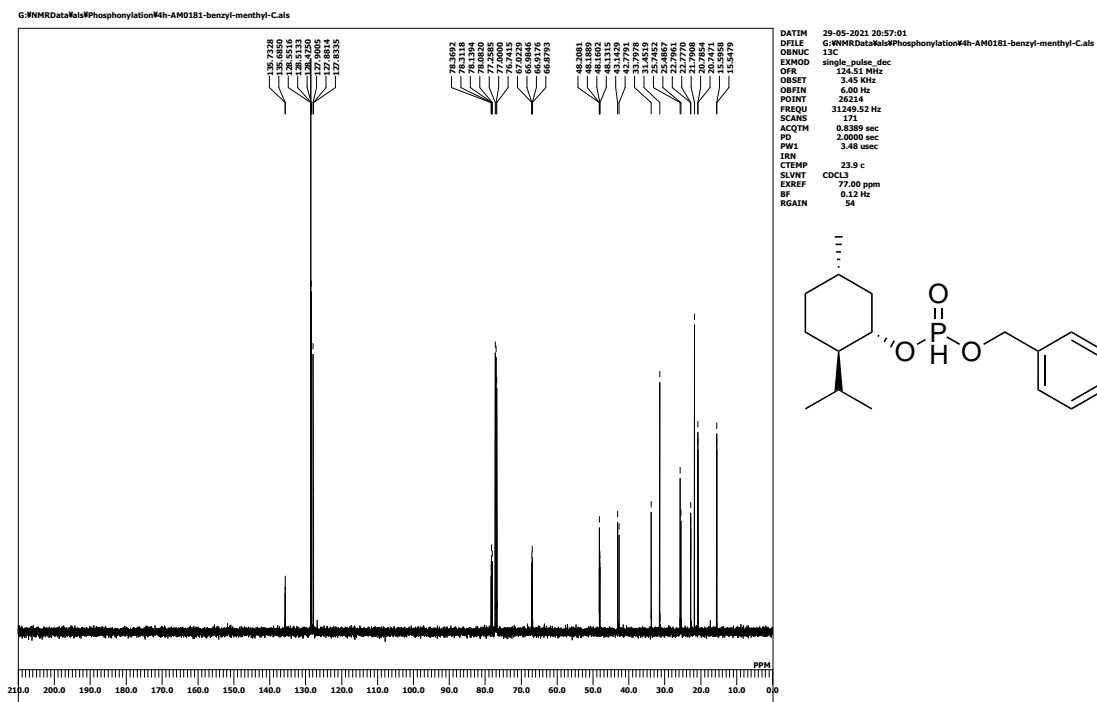

$^{31}\text{P}$  NMR (243 MHz,  $\text{CDCl}_3$ ) of **4h**

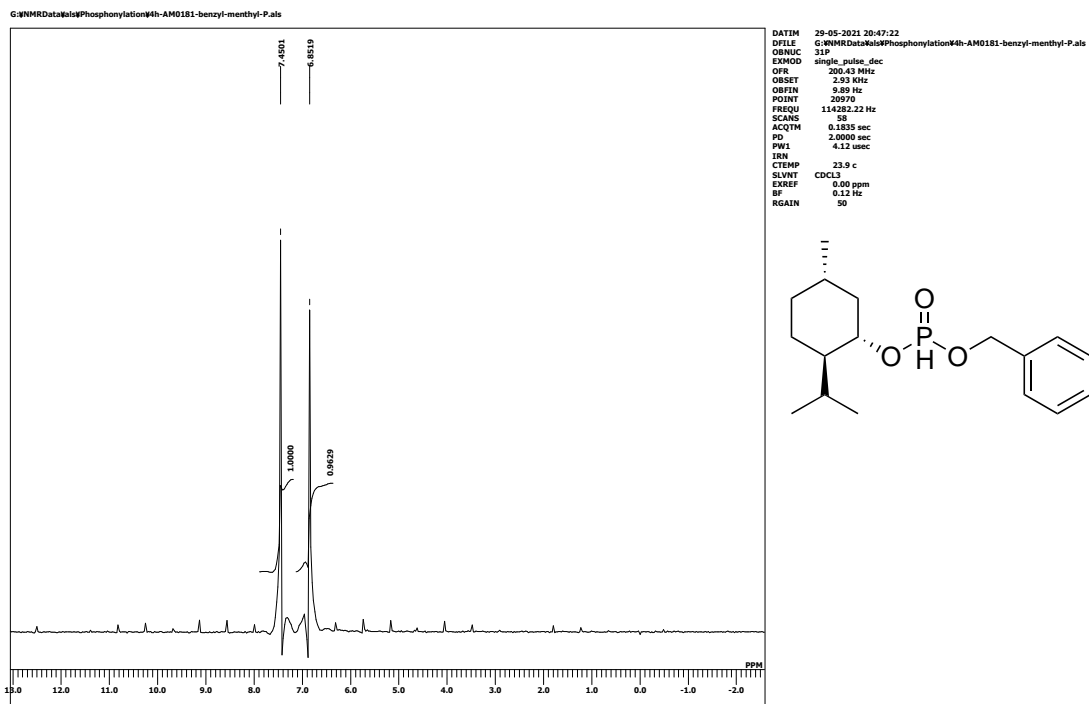



<sup>1</sup>H NMR (600 MHz, CDCl<sub>3</sub>) of **4i**

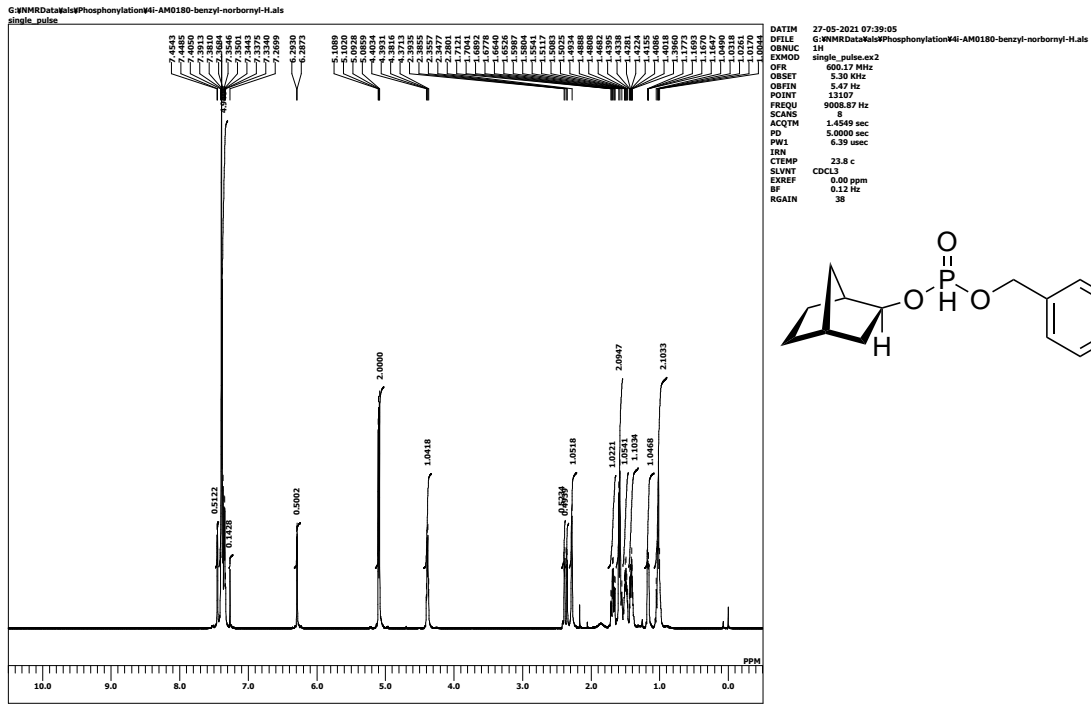

<sup>13</sup>C NMR (151 MHz, CDCl<sub>3</sub>) of **4i**

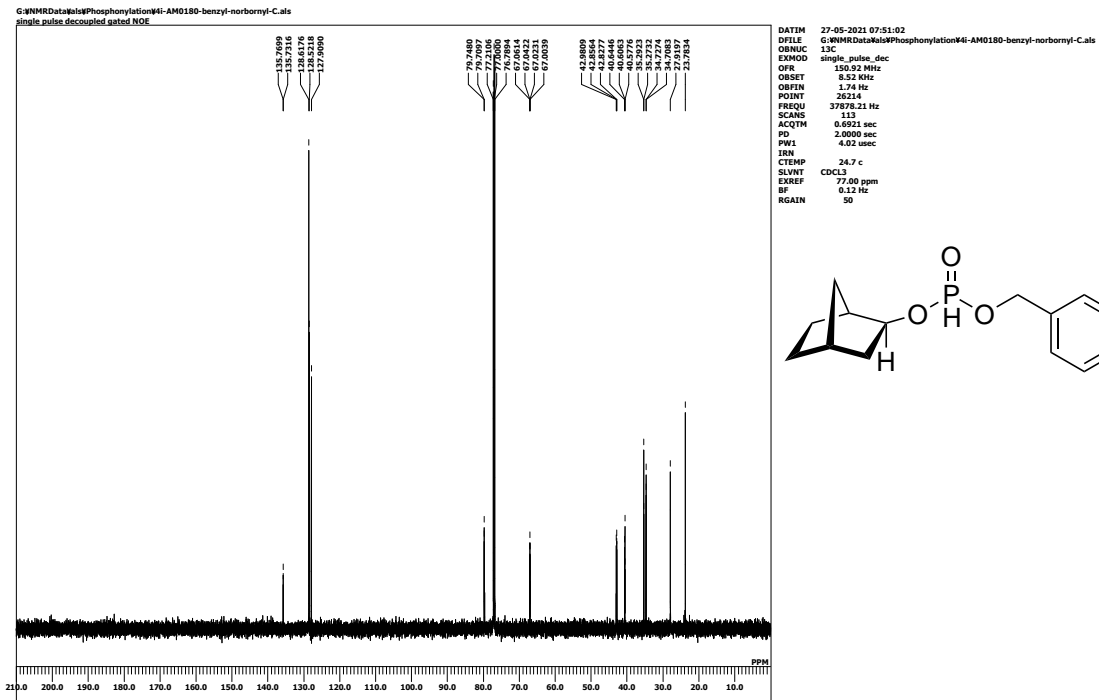

$^{31}\text{P}$  NMR (243 MHz,  $\text{CDCl}_3$ ) of **4i**

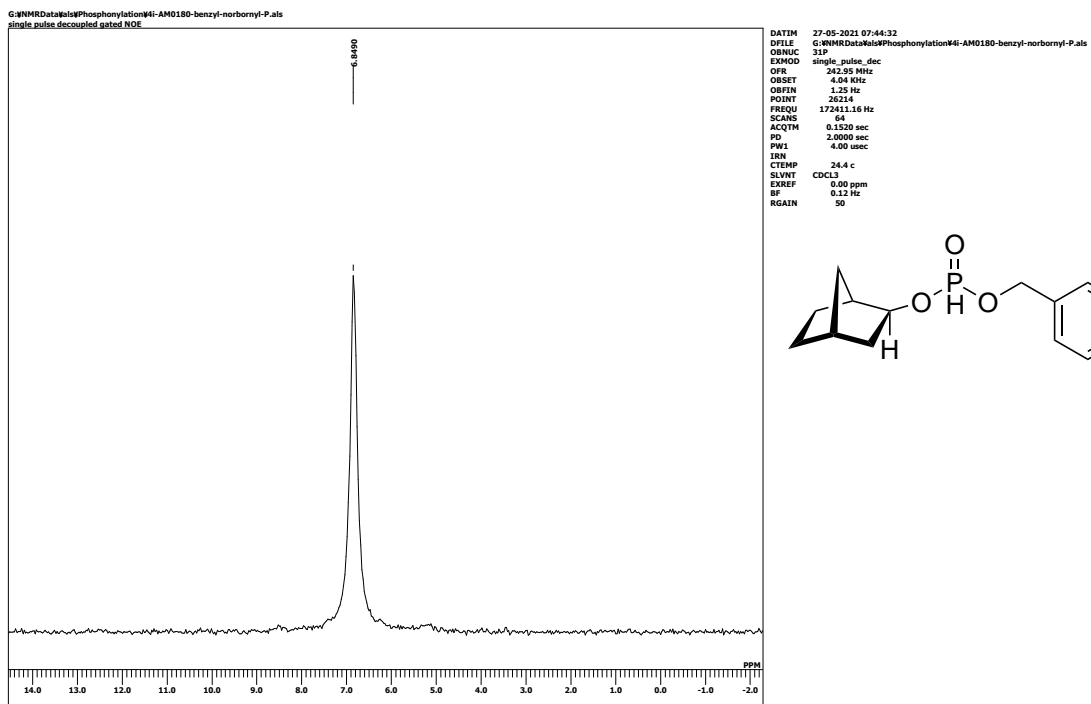

# <sup>1</sup>H NMR (600 MHz, CDCl<sub>3</sub>) of 4j

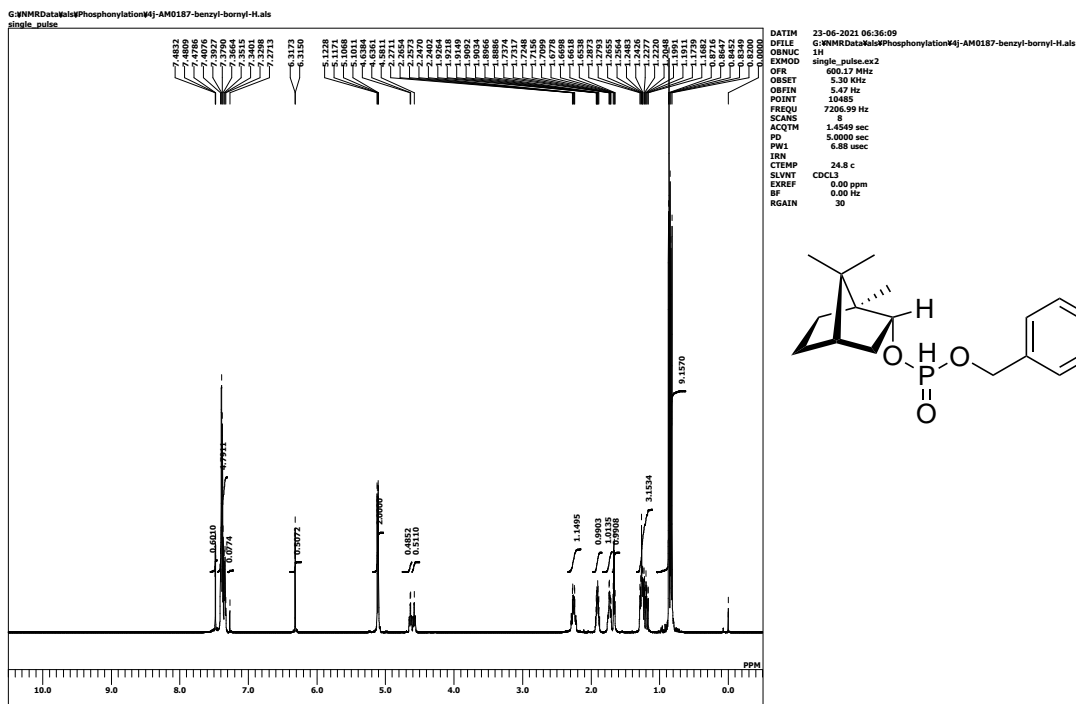

# <sup>13</sup>C NMR (151 MHz, CDCl<sub>3</sub>) of 4j

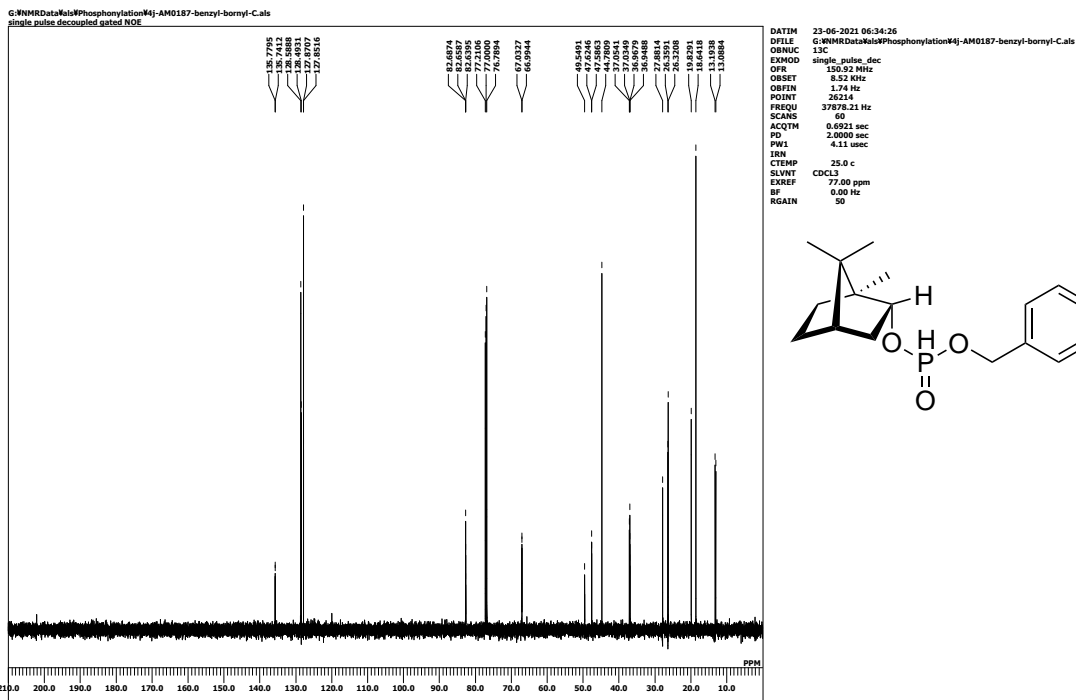

$^{31}\text{P}$  NMR (243 MHz,  $\text{CDCl}_3$ ) of **4j**

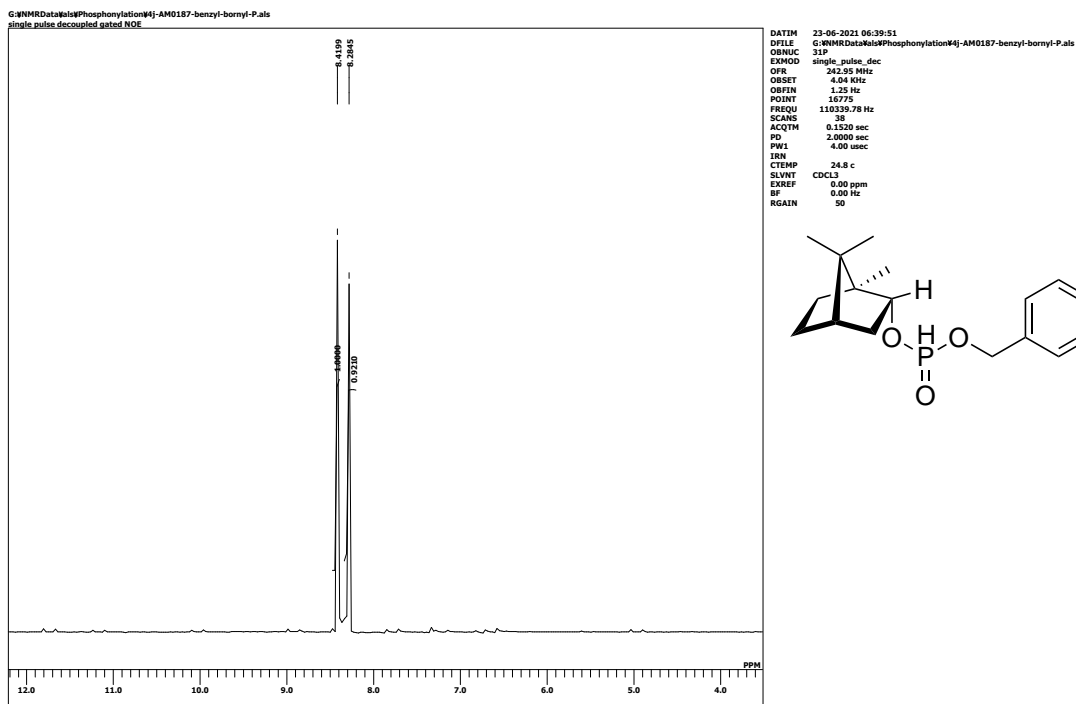



$^{31}\text{P}$  NMR (243 MHz,  $\text{CDCl}_3$ ) of **4k**

G:\NMRData\als\Phosphorylation\4k-AM0182-benzyl-2-octyl-P.als

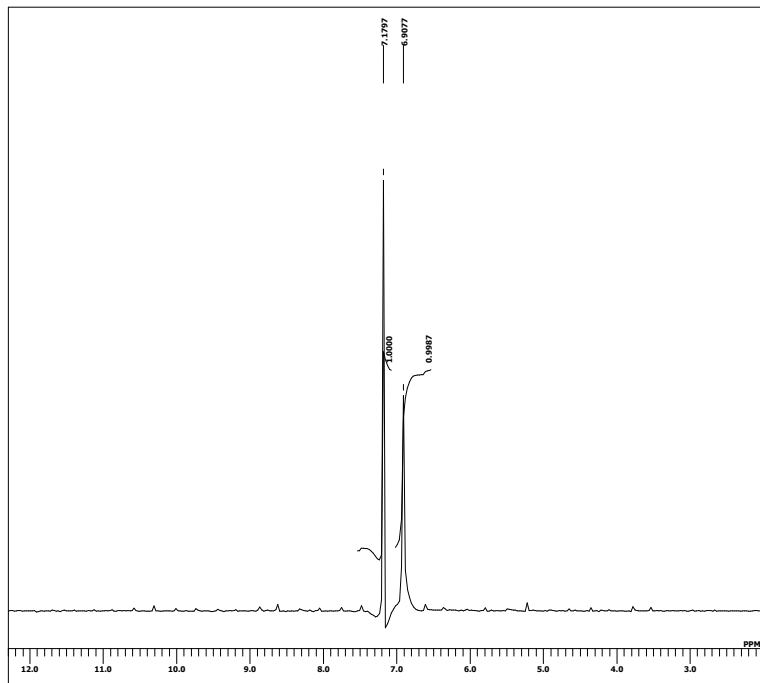

DATIM 03-06-2021 16:04:33  
DZFILE G:\NMRData\als\Phosphorylation\4k-AM0182-benzyl-2-octyl-P.als  
ORNUC 31P  
EXMOD single\_pulse\_dec  
GPR 200.43 MHz  
OBSET 2.93 KHz  
OBFIN 9.89 Hz  
POINT 8587  
FREQU 46807.14 Hz  
SCANS 40  
AQTM 0.1835 sec  
PD 2.0000 sec  
PWL 4.12 sec  
IRN  
CTEMP 24.2 c  
SLVNT  $\text{CDCl}_3$   
EXREF 0.00 ppm  
BF 0.12 Hz  
RGAIN 50

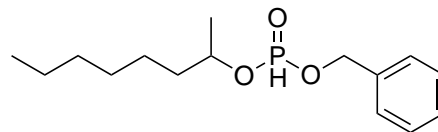

$^1\text{H}$  NMR (600 MHz,  $\text{CDCl}_3$ ) of **4I**

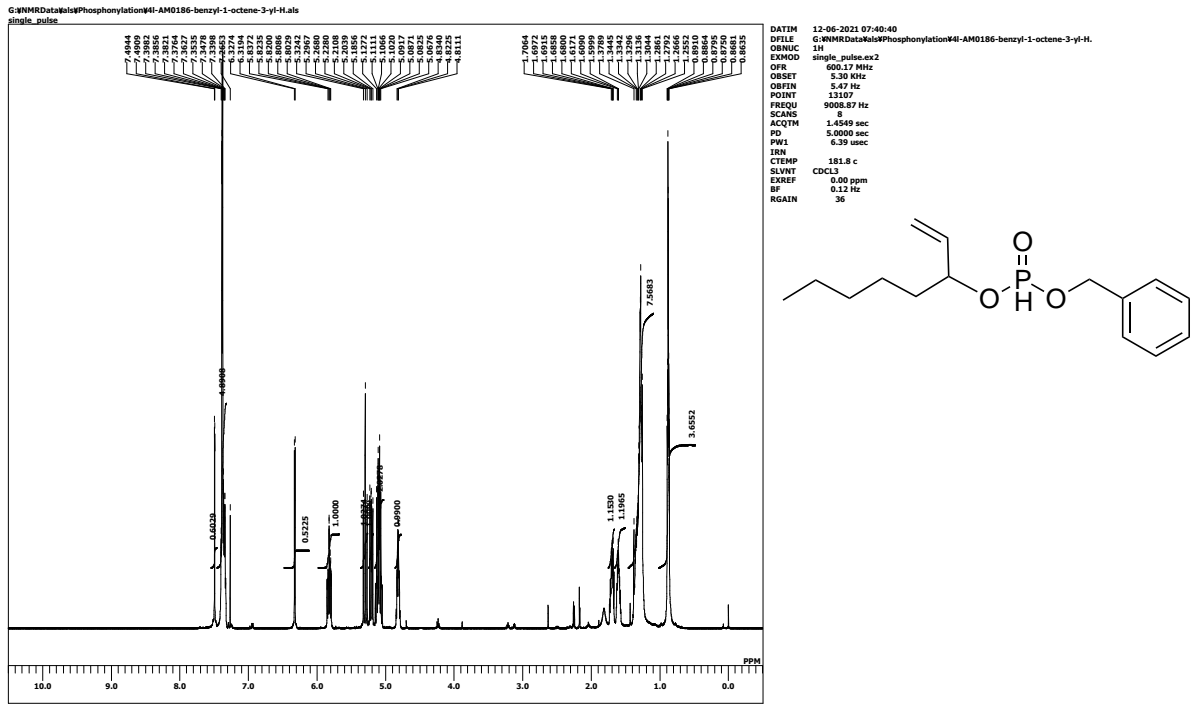

<sup>31</sup>P NMR (243 MHz, CDCl<sub>3</sub>) of **4I**

G:\NMRData\als\Phosphonylation\4I-AM0186-benzyl-1-octene-3-yl-P.als

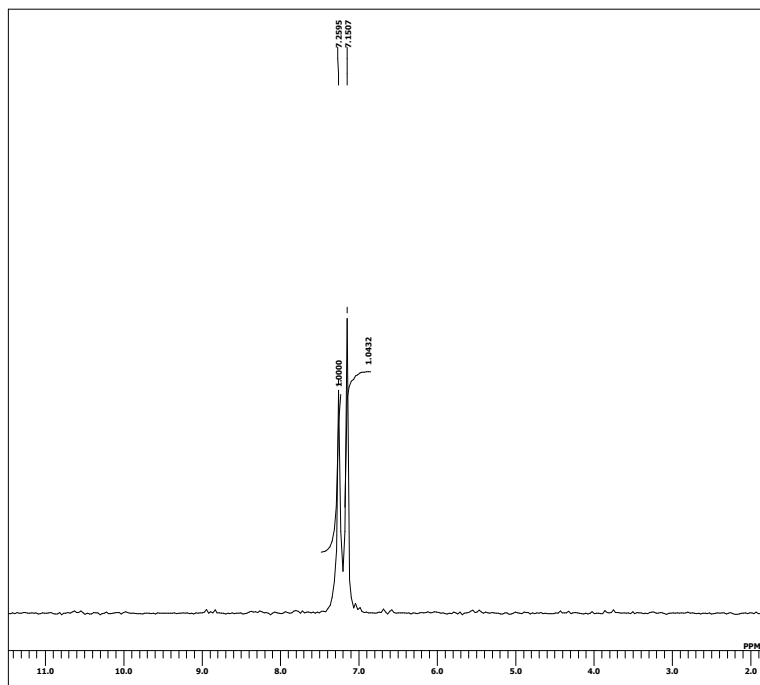

DATIM 12-06-2021 20:51:10  
DZFILE G:\NMRData\als\Phosphonylation\4I-AM0186-benzyl-1-octene-3-yl-P.  
ORNUC 31P  
EXMOD single\_pulse\_dec  
GPR 200.43 MHz  
OBSET 2.93 KHz  
OBFIN 9.89 Hz  
POINT 25214  
FREQU 142854.95 Hz  
SCANS 52  
AQTM 0.1835 sec  
PD 2.0000 sec  
PWL 4.12 usec  
IRN  
CTEMP 24.4 c  
SLVNT CDCl3  
EXREF 0.00 ppm  
BF 0.12 Hz  
RGAIN 50

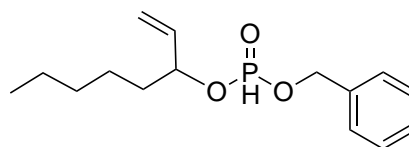





$^{31}\text{P}$  NMR (243 MHz,  $\text{CDCl}_3$ ) of **4m**

G:\NMRData\als\Phosphorylation\4m-AM0194-benzyl-cholestyl-P.als  
single pulse decoupled gated NDE

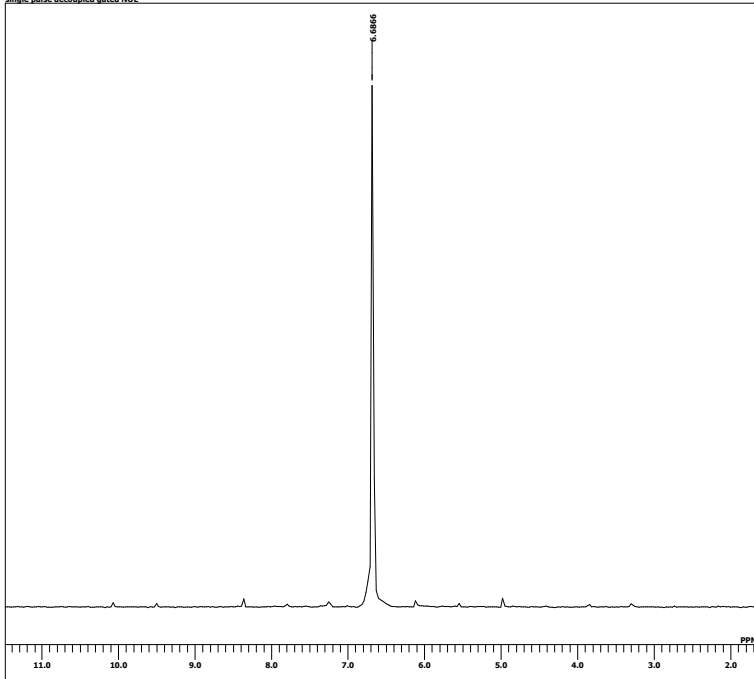

DATIM 08-07-2021 23:18:23  
DFILE G:\NMRData\als\Phosphorylation\4m-AM0194-benzyl-cholestyl-P.als  
DRVIC 31P  
EXMOD single\_pulse\_dec  
DPR 242.25 MHz  
OBSET 4.04 KHz  
OBFIN 1.25 Hz  
POINT 20214  
FREQU 172411.16 Hz  
SCANS 64  
AQTM 0.1520 sec  
PD 2.0000 sec  
PWL 4.00 usec  
IRN  
CTEMP 24.7 c  
SLVNT  $\text{CDCl}_3$   
EXREF 0.00 ppm  
BF 0.12 Hz  
RGAIN 50

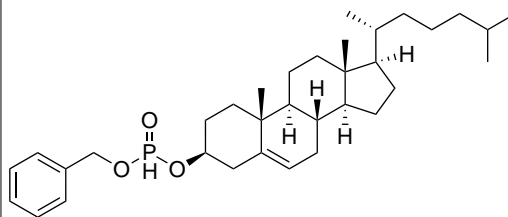

<sup>1</sup>H NMR (600 MHz, CDCl<sub>3</sub>) of **4n**

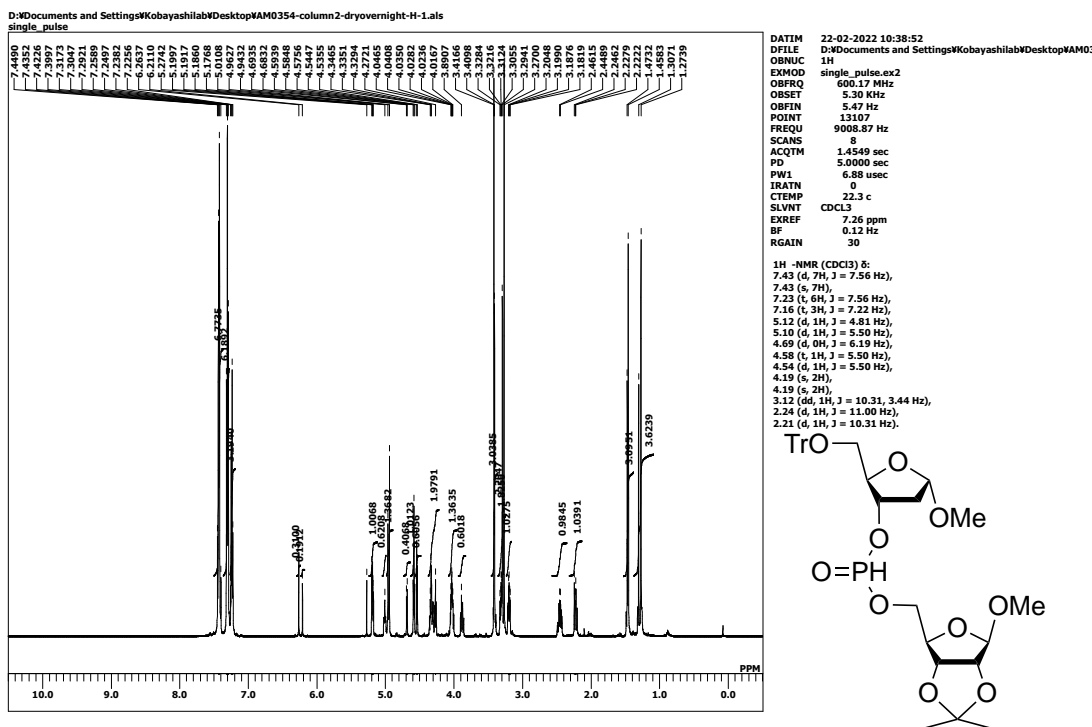

<sup>13</sup>C NMR (151 MHz, CDCl<sub>3</sub>) of **4n**

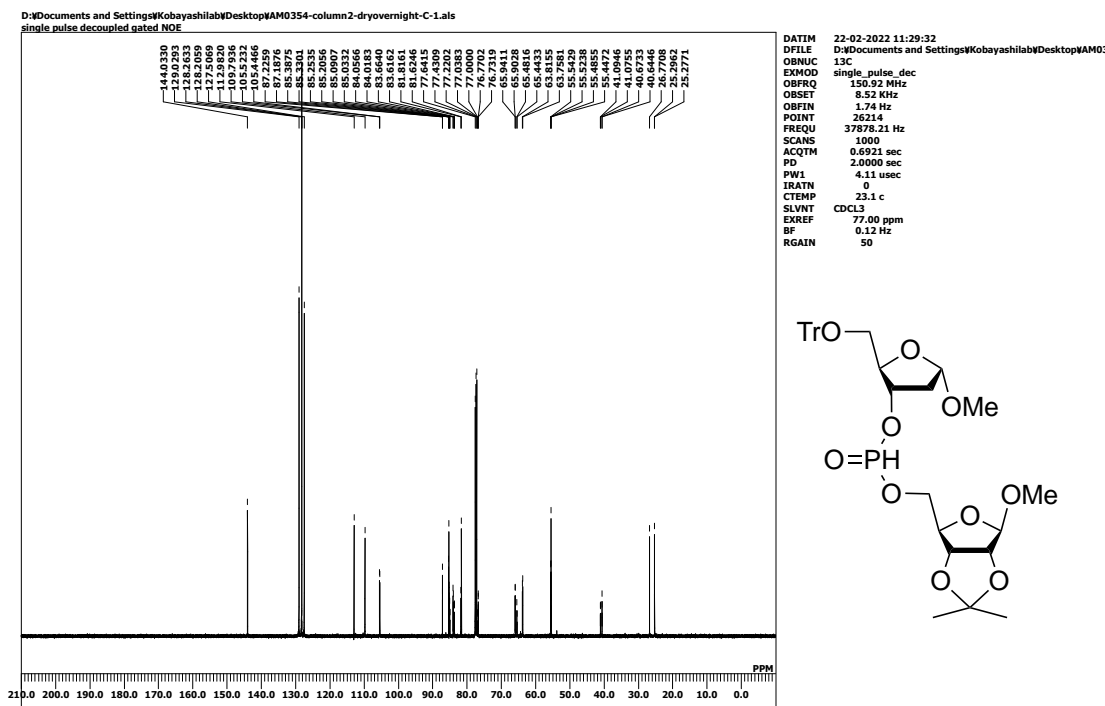

$^{31}\text{P}$  NMR (243 MHz,  $\text{CDCl}_3$ ) of **4n**

D:\Documents and Settings\Kobayashilab\Desktop\AM0354-column2-dryovernight-P-1.als  
single pulse decoupled gated NOE

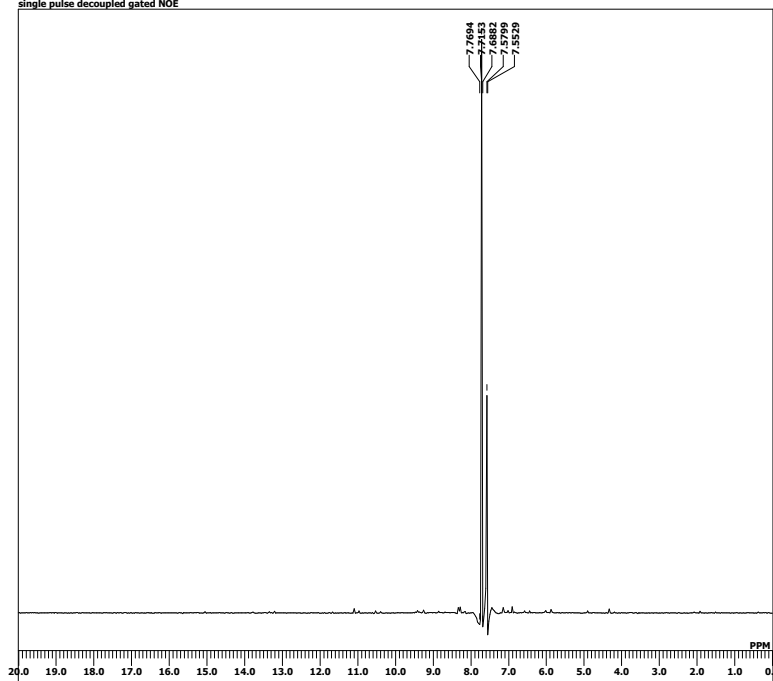

DATIM 22-02-2022 10:43:14  
D:\Documents and Settings\Kobayashilab\Desktop\AM0354-column2-dryovernight-P-1.als  
DFILE D:\Documents and Settings\Kobayashilab\Desktop\AM0354-column2-dryovernight-P-1.als  
OBNUC 31P  
EXMOD single\_pulse\_dec  
OBFRQ 242.95 MHz  
OBSET 4.04 KHz  
OBFIN 1.25 Hz  
POINT 26214  
FREQU 172411.16 Hz  
SCANS 116  
ACQTM 0.1520 sec  
PD 2.0000 sec  
PW1 4.00 usec  
IRATH 0  
CTEMP 22.8 c  
SLVNT  $\text{CDCl}_3$   
EKREF 0.00 ppm  
BF 0.12 Hz  
RGAIN 50

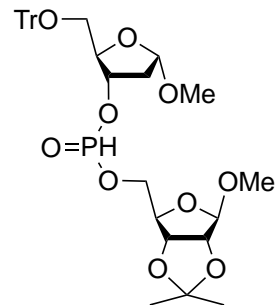

# <sup>1</sup>H NMR (500 MHz, CDCl<sub>3</sub>) of **5a**

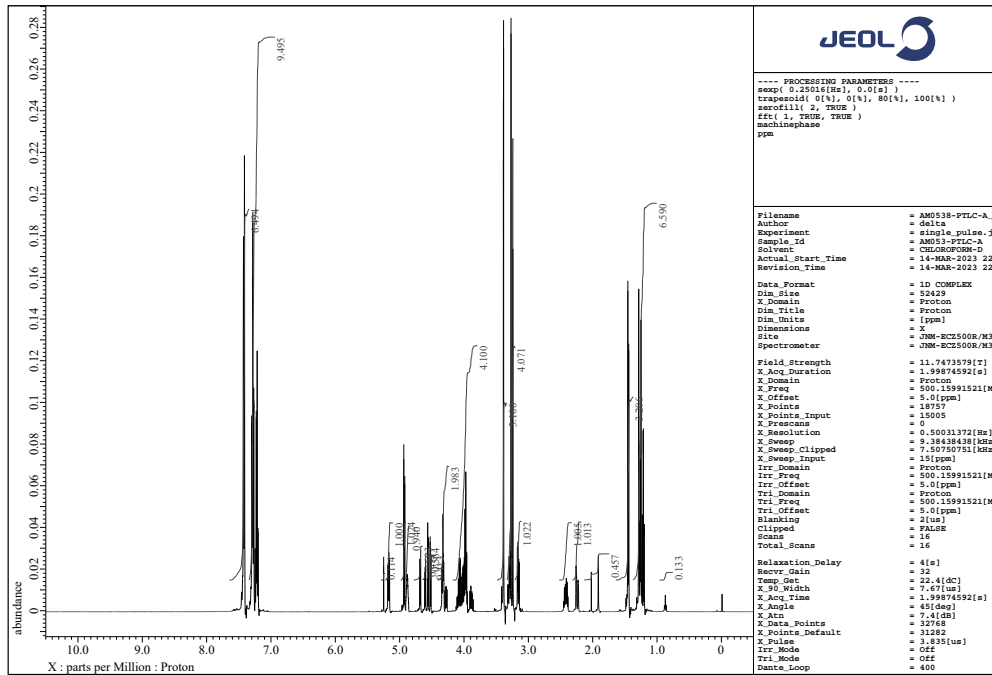

# <sup>13</sup>C NMR (126 MHz, CDCl<sub>3</sub>) of **5a**

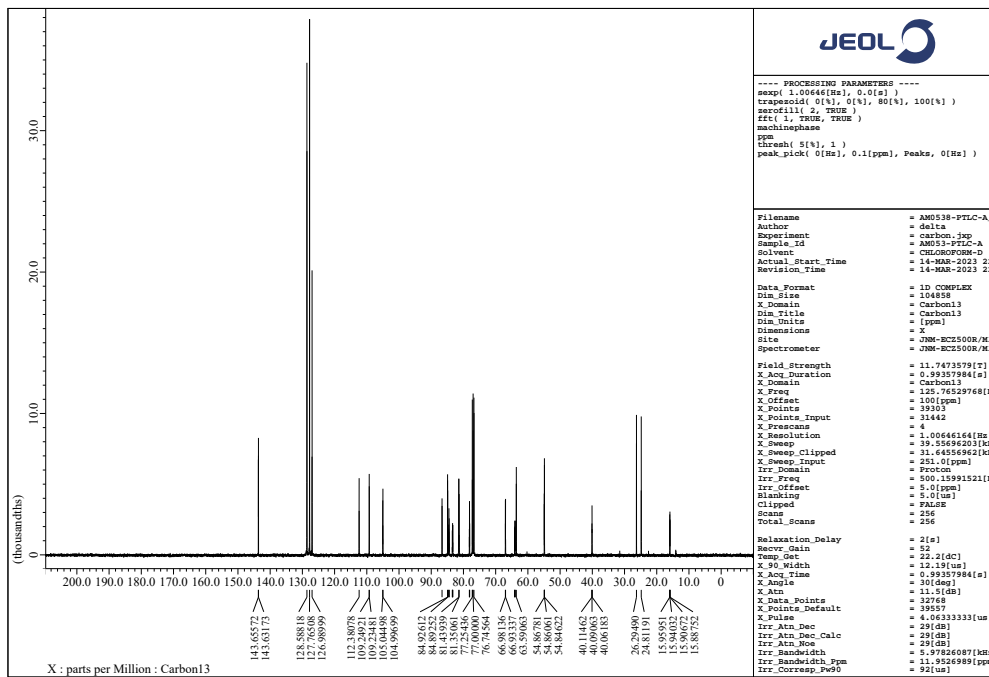

<sup>31</sup>P NMR (243 MHz, CDCl<sub>3</sub>) of **5a**

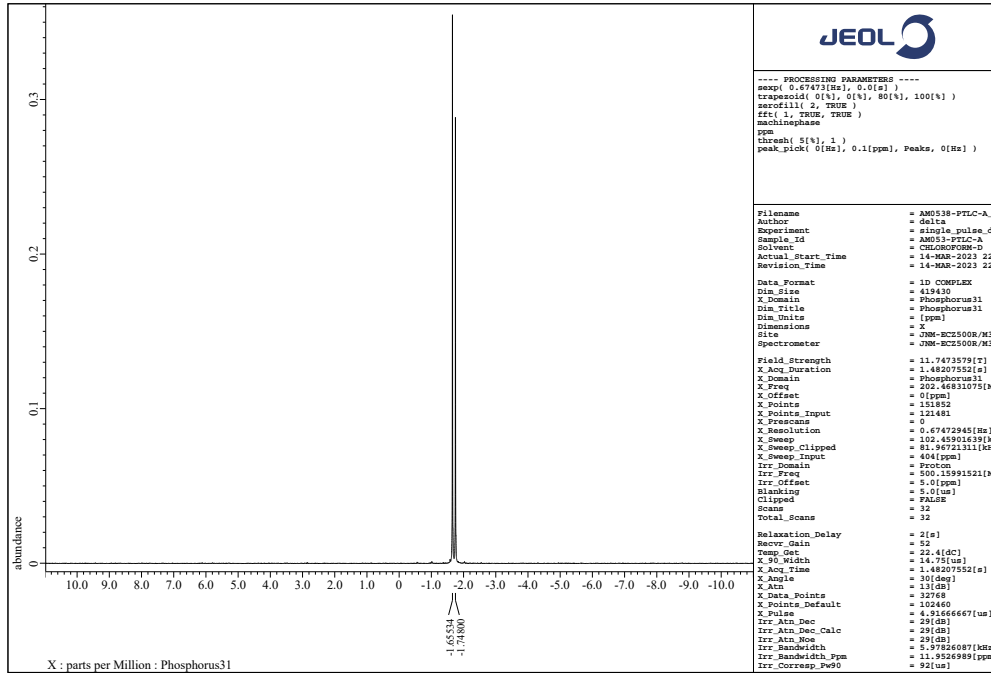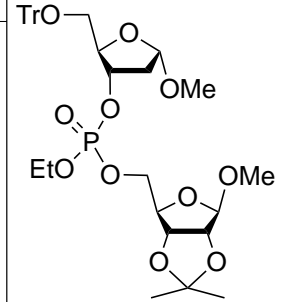

<sup>1</sup>H NMR (500 MHz, CDCl<sub>3</sub>) of **40**

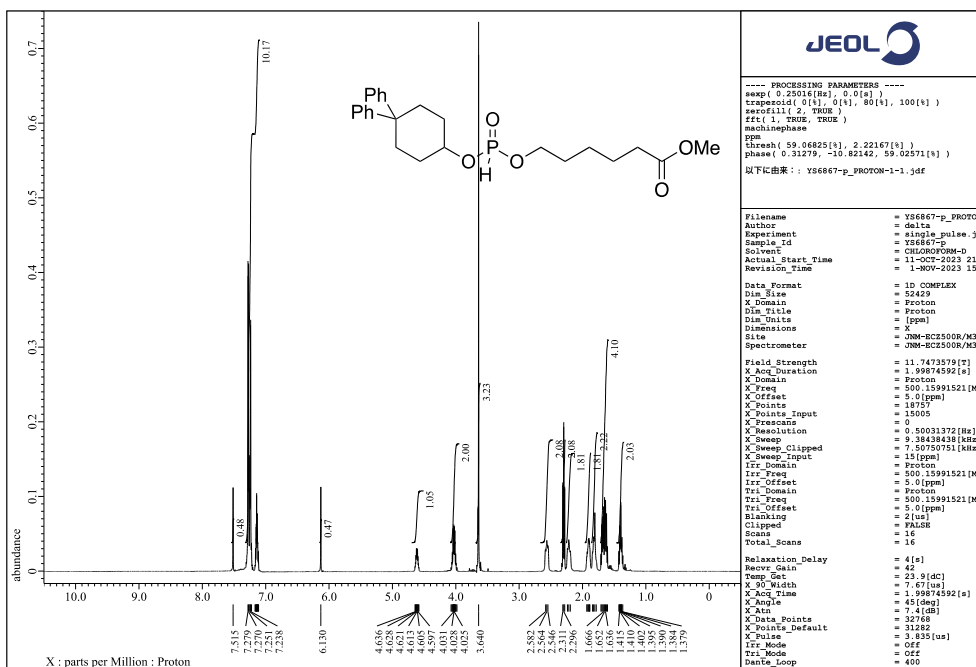

<sup>13</sup>C NMR (126 MHz, CDCl<sub>3</sub>) of **40**

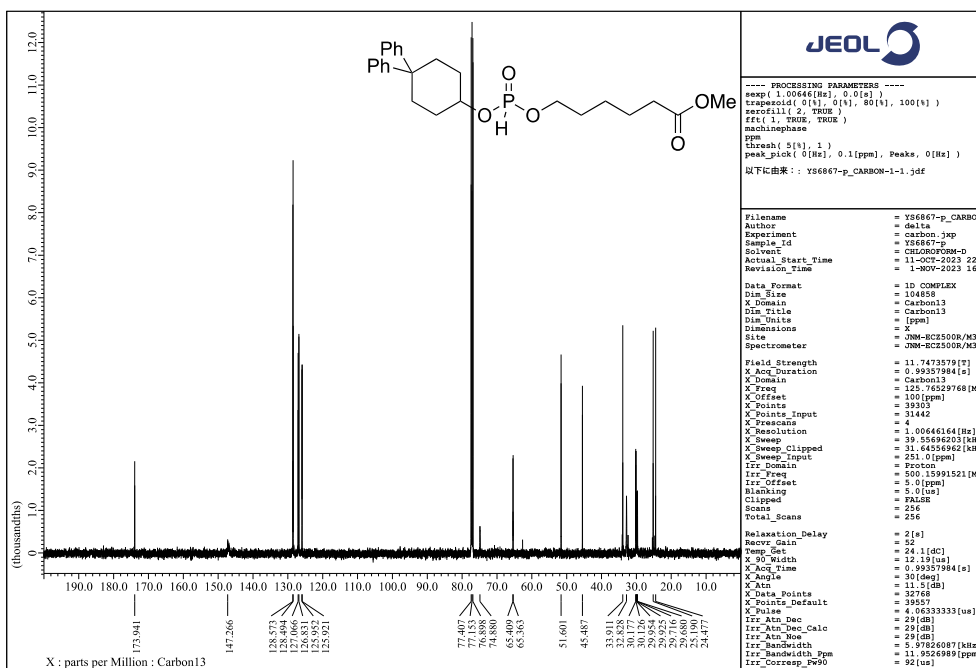

<sup>31</sup>P NMR (203 MHz, CDCl<sub>3</sub>) of **4o**

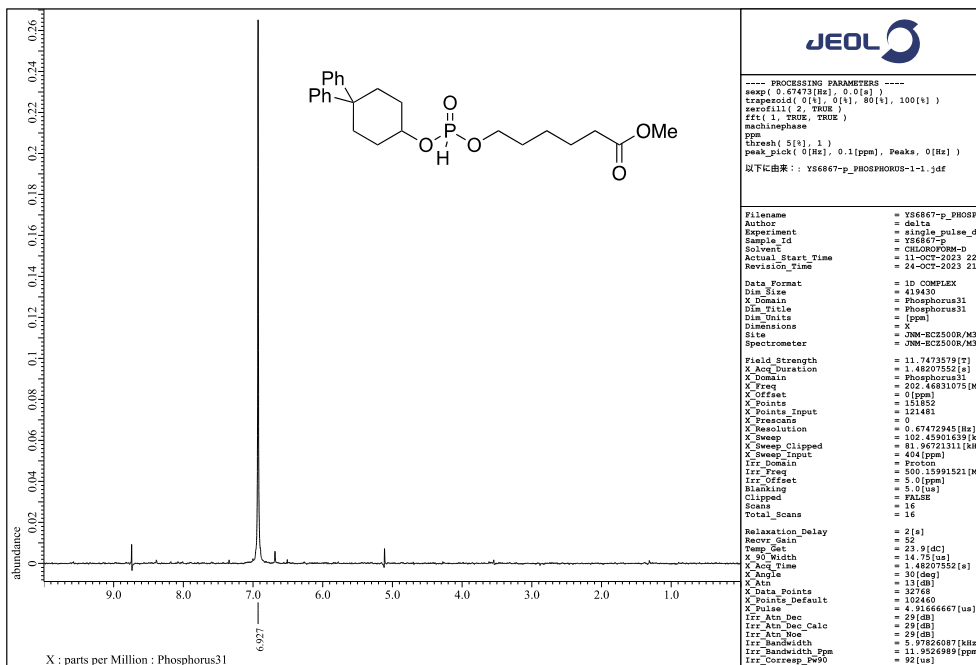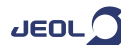

```

----- PROCESSING PARAMETERS -----
sweep( 0.67473[Hz], 0.0[s] )
trapezoid( 0[Hz], 0[Hz], 80[Hz], 100[Hz] )
zerofill( 2, TRUE )
fft( 1, TRUE, TRUE )
machinphases
ppm
thresh( 5[Hz], 1 )
peak_pick( 0[Hz], 0.1[ppm], Peaks, 0[Hz] )
以下は由来: YS6867-p_PHOSPHORUS-1-1.jdf
    
```

```

Filename      = YS6867-p_PHOSP
Author        = delta
Experiment    = single_pulse_d
Sample_id     = YS6867p
Solvent       = CHLOROFORM-D
Actual_Start_Time = 11-OCT-2023 22
Revision_Time = 24-OCT-2023 21

Data_Format   = ID COMPLEX
Dir_Size      = 419430
X_Domain      = Phosphorus31
Dir_Title     = Phosphorus31
Dir_Units     = [ppm]
Dimensions    = X
Site          = JNM-ECS500R/M3
Spectrometer  = JNM-ECS500R/M3

Field_Strength = 11.747379[Hz]
X_AcqDuration  = 1.48207552[s]
X_Domain       = Phosphorus31
X_Freq         = 202.4631075[M]
X_Offset       = 0[ppm]
X_Points       = 151832
X_Time         = 121481
X_Prescans     = 0
X_Resolution   = 0.67472945[Hz]
X_Sweep        = 102.45901639[k]
X_Sweep_Input  = 81.98701311[Hz]
X_Sweep_Clipped = 404[ppm]
X_Sweep_Input  = 404[ppm]
F1r_Domain     = F1r
F1r_Freq       = 500.13991521[M]
F1r_Offset     = 5.0[ppm]
Blanking       = 5.0[us]
Clipping       = PALSS
Scans          = 16
Total_Scans    = 16

Relaxation_Delay = 2[s]
Recvr_Gain       = 32
Temp_Cnt        = 23.9[degC]
X_90_Width      = 14.75[us]
X_Acq_Time      = 1.48207552[s]
X_Angle         = 30[deg]
X_Attn          = 13[dB]
X_Data_Points   = 102460
X_Points_Default = 102460
X_Pulse         = 4.91666667[us]
F1r_Atn_Dec     = 29[dB]
F1r_Atn_Dec_Calc = 29[dB]
F1r_Atn_Noise   = 29[dB]
F1r_Bandwidth   = 5.97626087[MHz]
F1r_Bandwidth_Ppm = 11.95269891[ppm]
F1r_Corresp_Fw90 = 92[us]
    
```



<sup>1</sup>H NMR (500 MHz, CDCl<sub>3</sub>) of **5b**

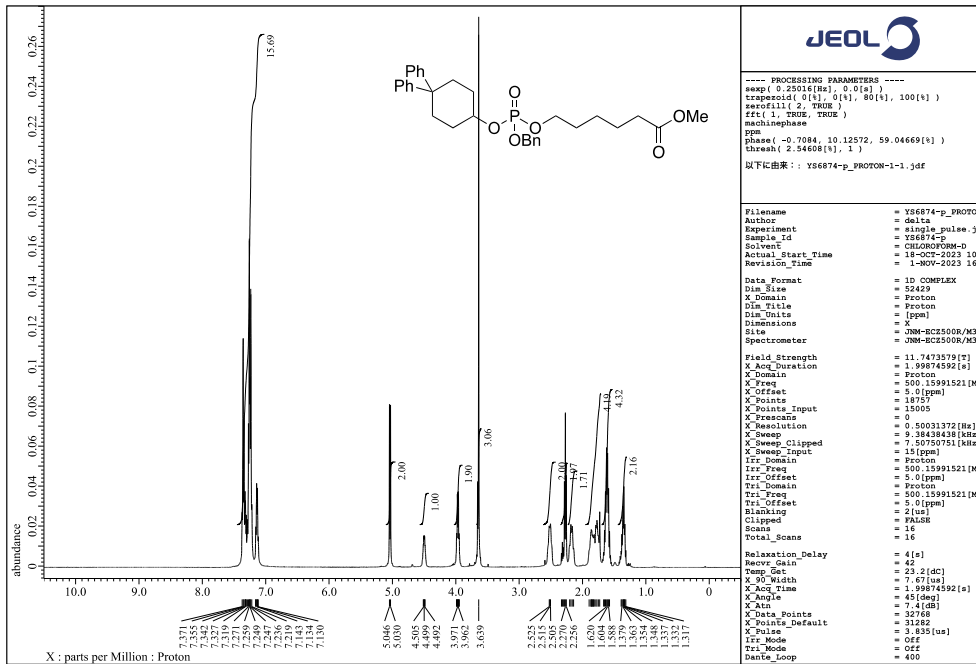

<sup>13</sup>C NMR (126 MHz, CDCl<sub>3</sub>) of **5b**

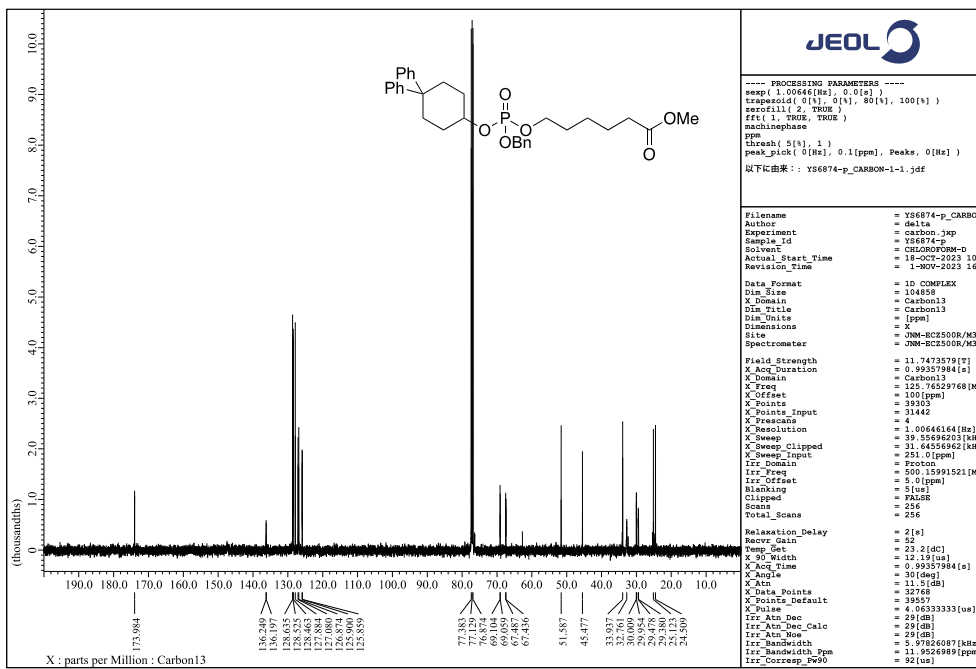

<sup>31</sup>P NMR (203 MHz, CDCl<sub>3</sub>) of **5b**

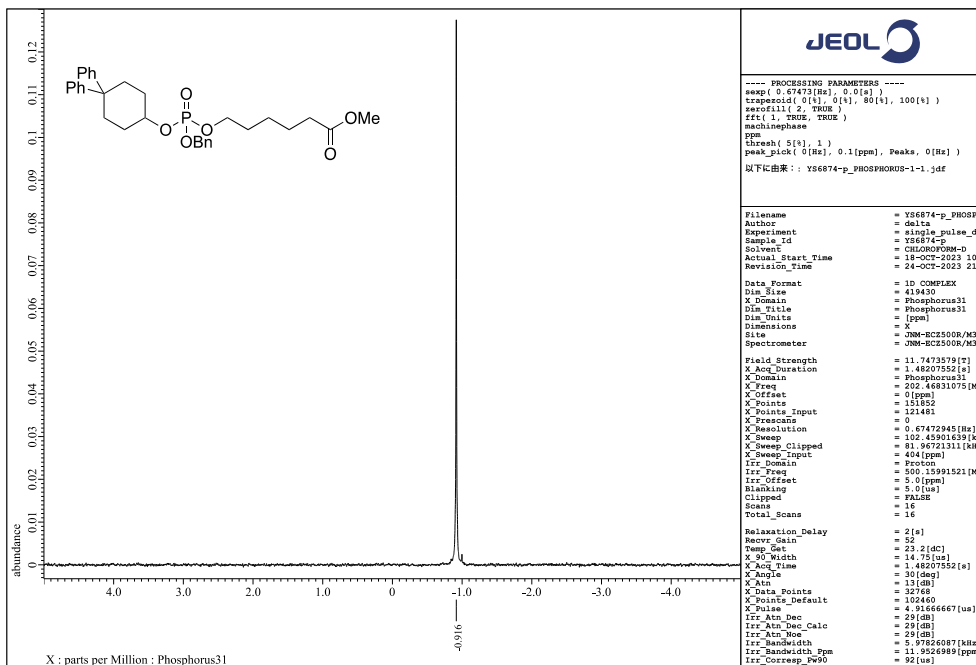

<sup>1</sup>H NMR (500 MHz, CDCl<sub>3</sub>) of **5c**

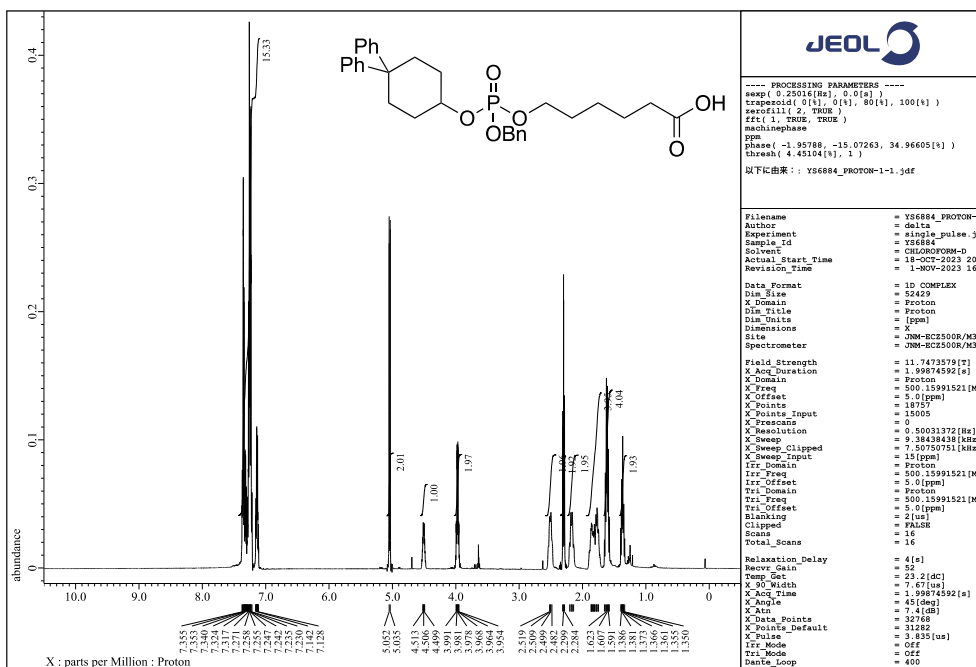

<sup>13</sup>C NMR (126 MHz, CDCl<sub>3</sub>) of **5c**

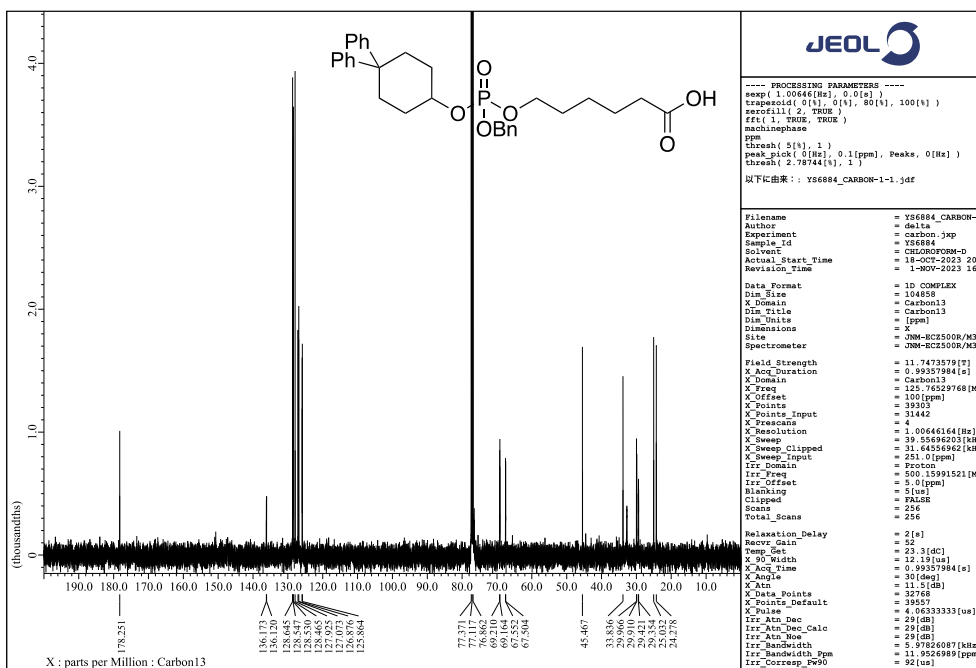

<sup>31</sup>P NMR (203 MHz, CDCl<sub>3</sub>) of **5c**

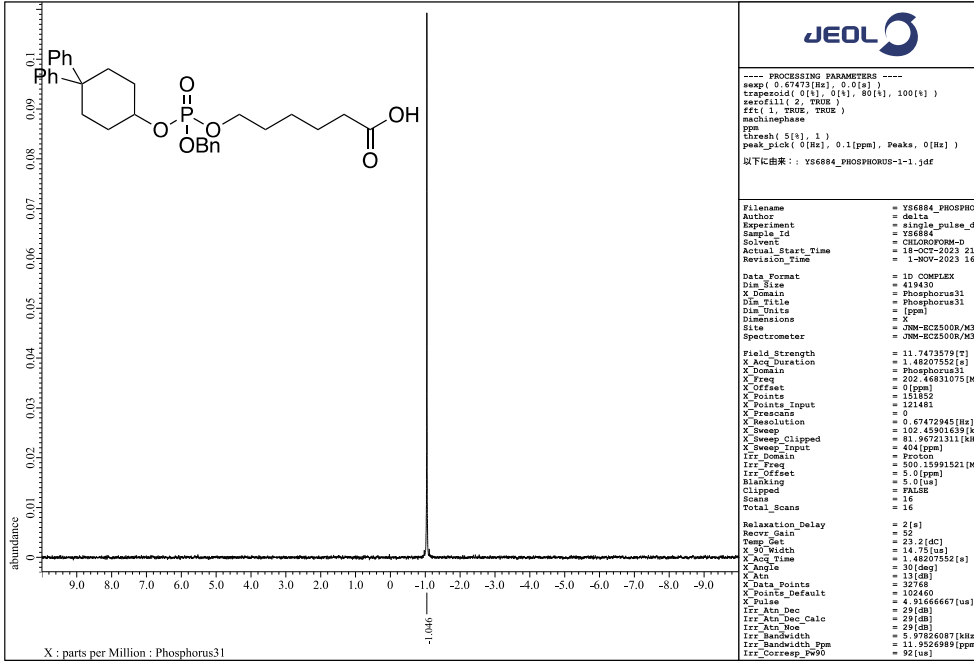

<sup>1</sup>H NMR (500 MHz, MeOH-d<sub>4</sub>) of **5d**

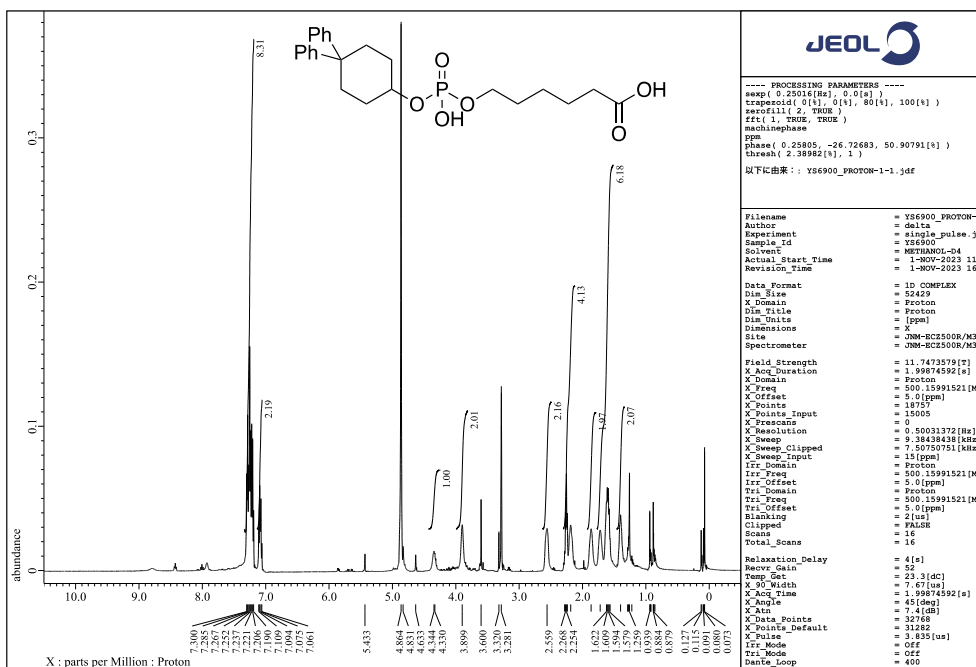

<sup>13</sup>C NMR (126 MHz, MeOH-d<sub>4</sub>) of **5d**

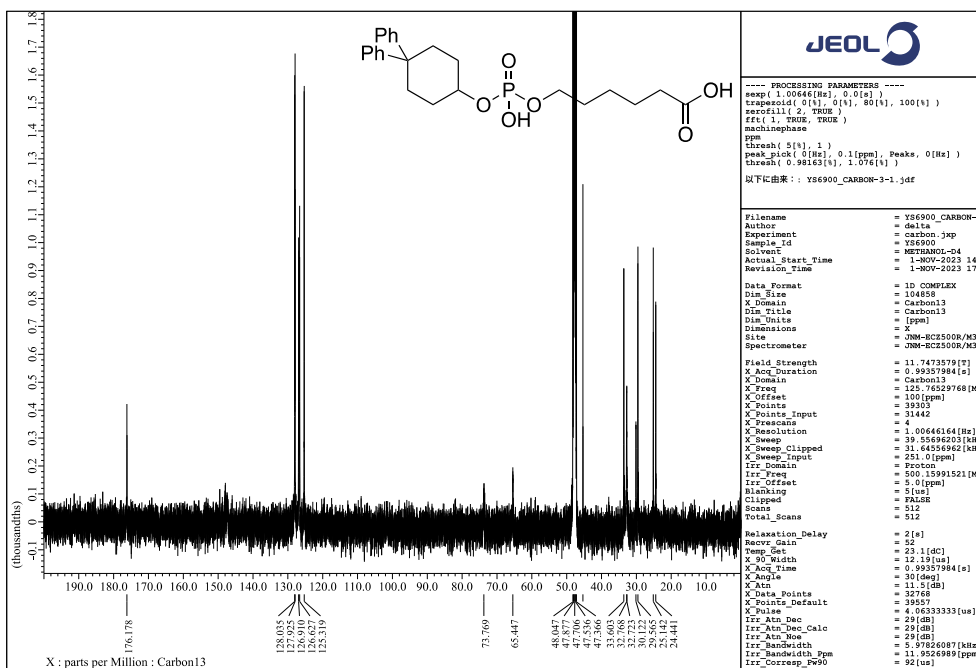

<sup>31</sup>P NMR (203 MHz, MeOH-d<sub>4</sub>) of **5d**

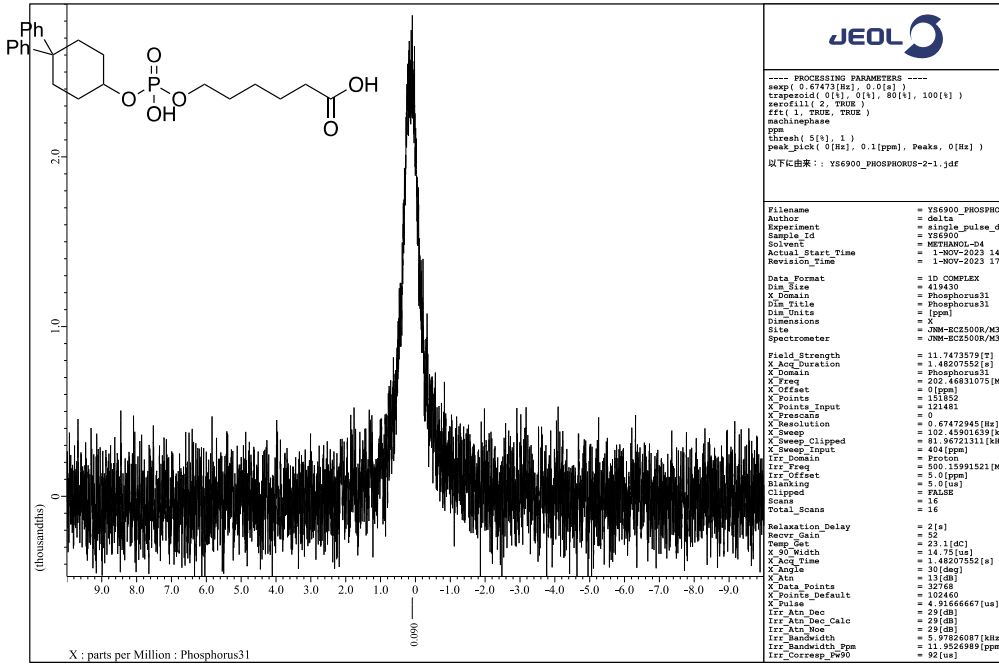

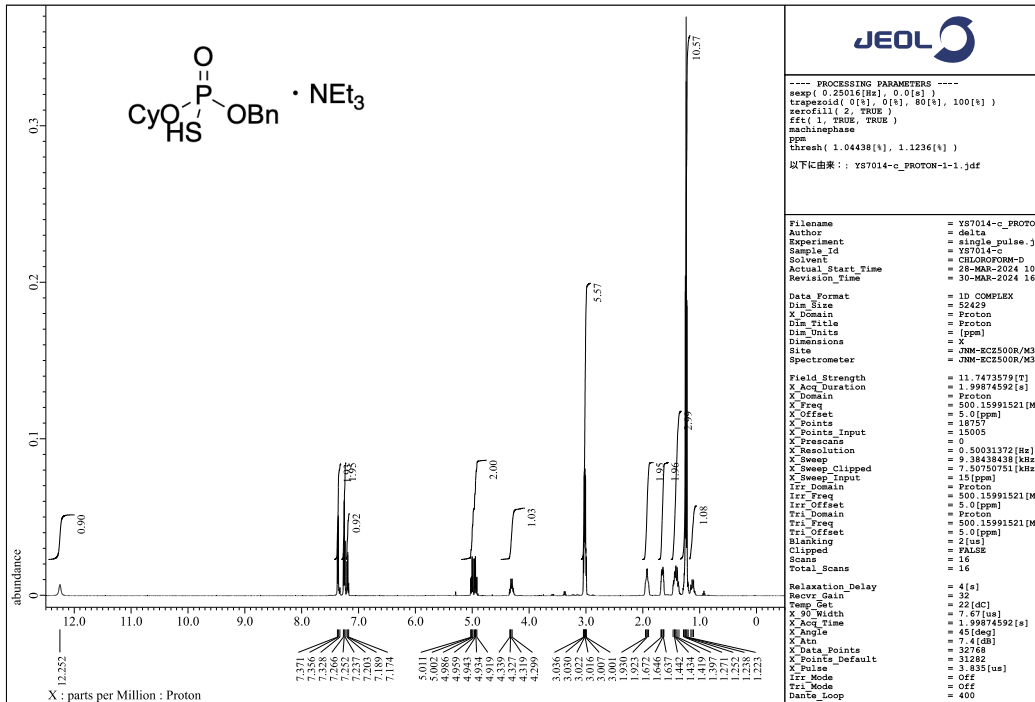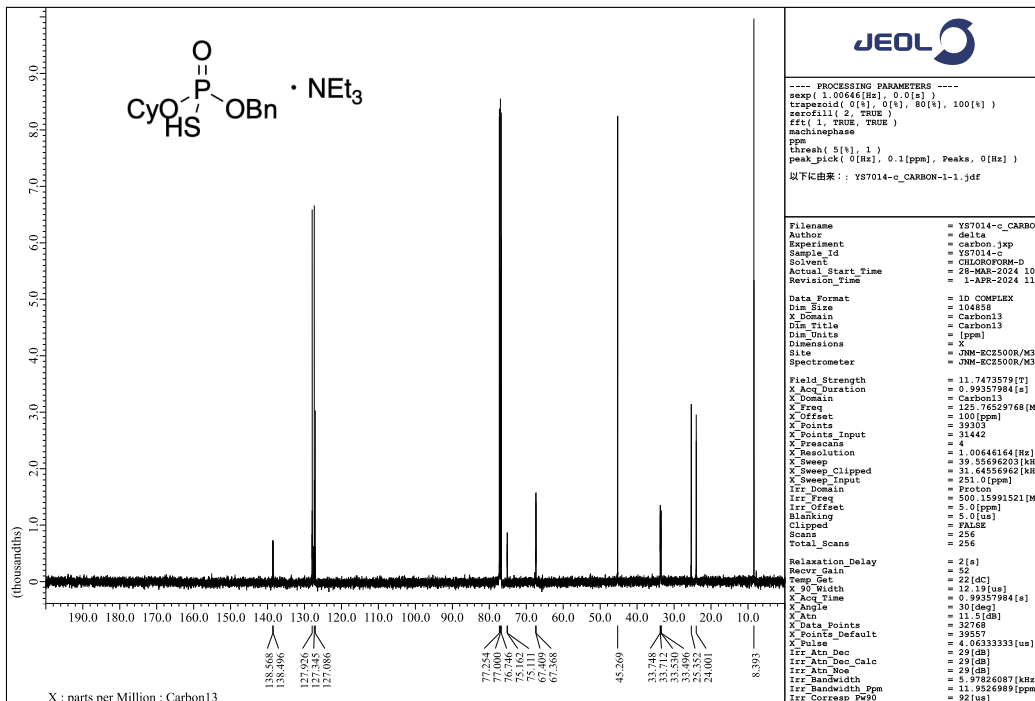

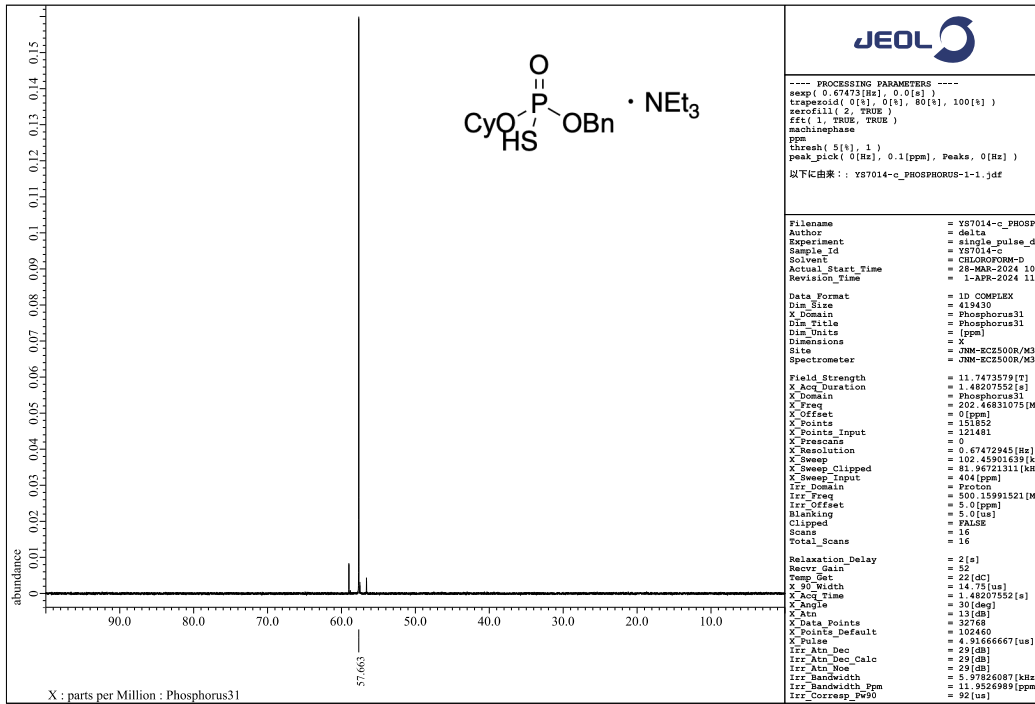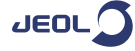

```

---- PROCESSING PARAMETERS ----
sexp( 0.67475[Hz], 0.0[s] )
trapezoid( 0[Hz], 0[Hz], 80[Hz], 100[Hz] )
zerofill( 2, TRUE )
fit( 1, TRUE, TRUE )
machinephase
ppm
thresh( 5[Hz], 1 )
peak_pick( 0[Hz], 0.1[ppm], Peaks, 0[Hz] )
以下は由来 : YS7014-c_PHOSPHORUS-1-1.jdf

```

```

Filename      = YS7014-c_PHOSP
Author        = delta
Experiment    = single_pulse_d
Sample_Id     = YS7014-c
Solvent       = CHLOROFORM-D
Actual_Start_Time = 28-MAR-2024 10
Revision_Time = 1-APR-2024 11

Data Format    = ID COMPLEX
Dim Size      = 419430
X_Domain      = Phosphorus31
Dim Title     = Phosphorus31
Dim Units     = [ppm]
Dimensions    = X
Spectrometer  = JNM-ECZ500R/M3

Field Strength = 11.7473579[T]
X_Acq_Duration = 1.48207532[s]
X_Domain       = Phosphorus31
X_Freq         = 202.46831075[M]
X_Offset       = 0[ppm]
X_Points       = 151852
X_Points_Input = 121481
X_Prescans     = 0
X_Resolution   = 0.67472945 [Hz]
X_Sweep        = 102.45901639[kHz]
X_Sweep_Clippped = 404[ppm]
X_Sweep_Input  = 404[ppm]
Irr_Domain     = Proton
Irr_Freq       = 500.15991521[M]
Irr_Offset     = 5.0[ppm]
Blanking      = 5.0[us]
Clipped       = FALSE
Scans         = 16
Total_Scans   = 16

Relaxation_Delay = 2[s]
Recv_Gain        = 52
Temp_Set         = 22[dc]
X_90_Width       = 14.75[us]
X_Acq_Time       = 1.48207532[s]
X_Angle          = 30[deg]
X_Attn           = 13[db]
X_Data_Points   = 32768
X_Points_Default = 102460
X_Pulse          = 4.91666667[us]
Irr_Atn_Dec     = 29[db]
Irr_Atn_Dec_Calc = 29[db]
Irr_Atn_Noise   = 29[db]
Irr_Bandwidth   = 5.97856887[kHz]
Irr_Bandwidth_Ppm = 11.9526989[ppm]
Irr_Corresp_MW90 = 92[us]

```



# <sup>1</sup>H NMR (600 MHz, CDCl<sub>3</sub>) of **3ad**

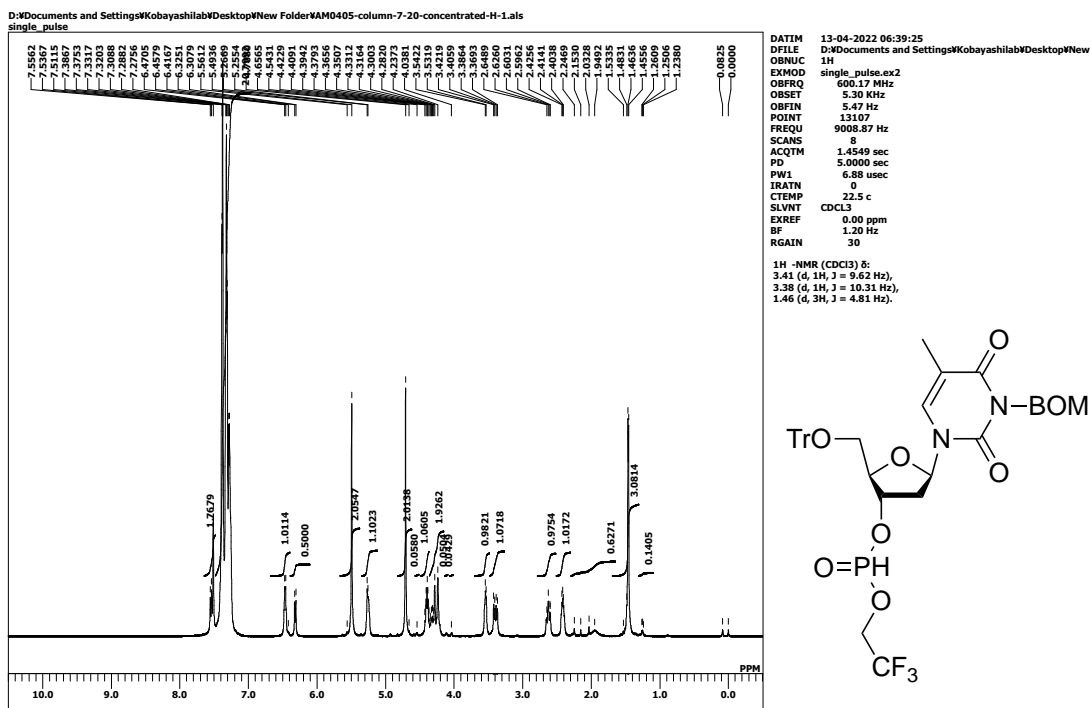

# <sup>13</sup>C NMR (151 MHz, CDCl<sub>3</sub>) of **3ad**

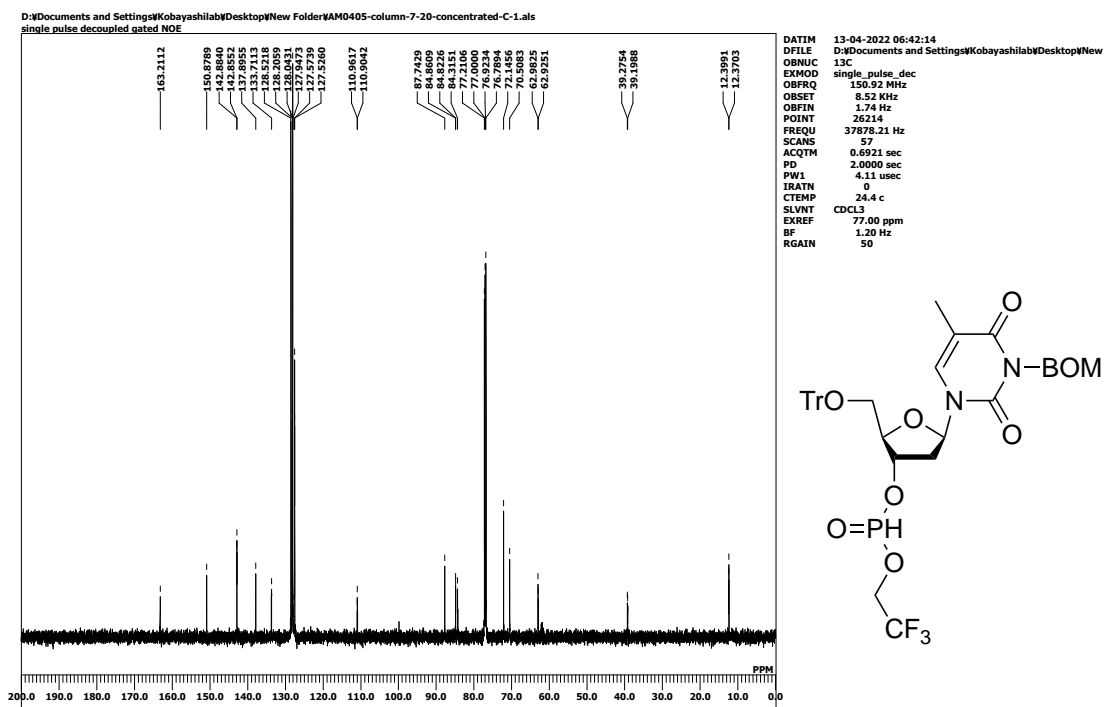

### $^{31}\text{P}$ NMR (243 MHz, $\text{CDCl}_3$ ) of **3ad**

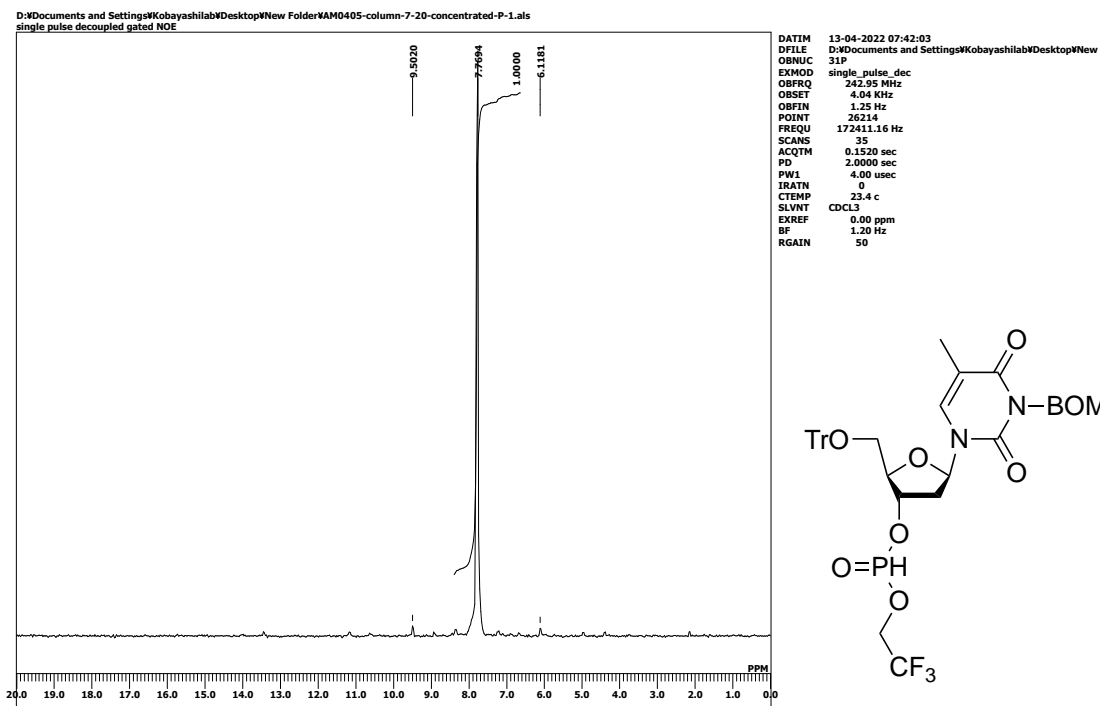

### $^{19}\text{F}$ NMR (565 MHz, $\text{CDCl}_3$ ) of **3ad**

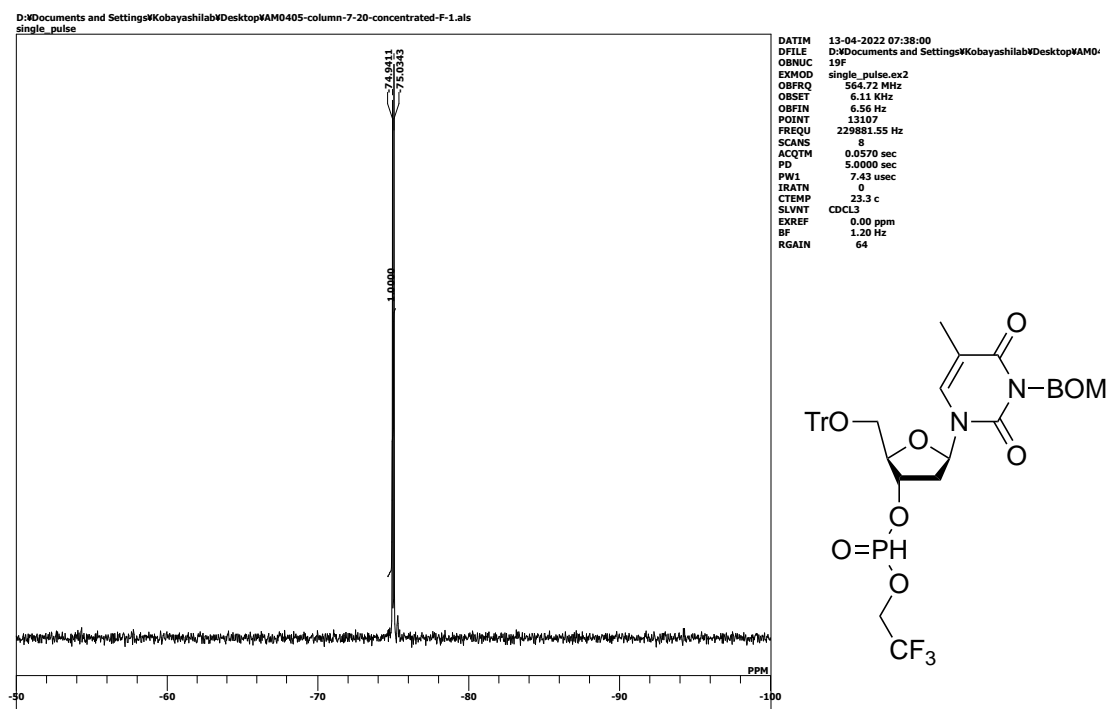



<sup>31</sup>P NMR (202 MHz, CDCl<sub>3</sub>) of **6a**

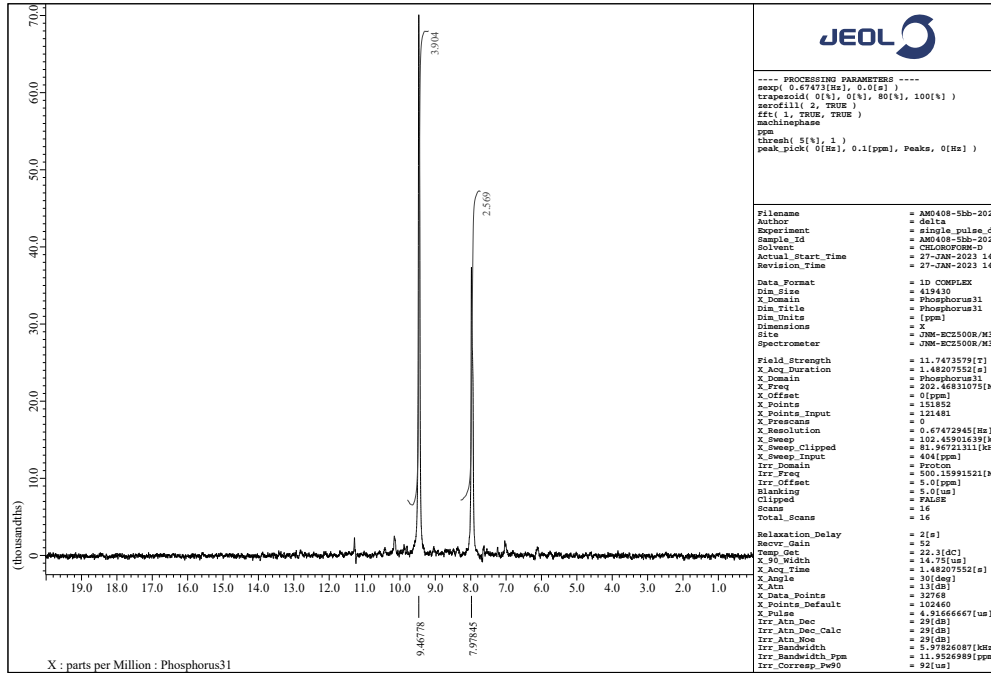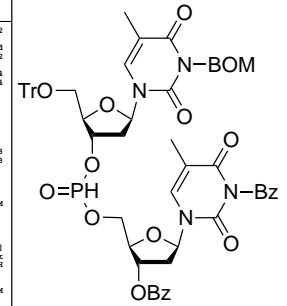

<sup>1</sup>H NMR (500 MHz, CDCl<sub>3</sub>) of **6b**

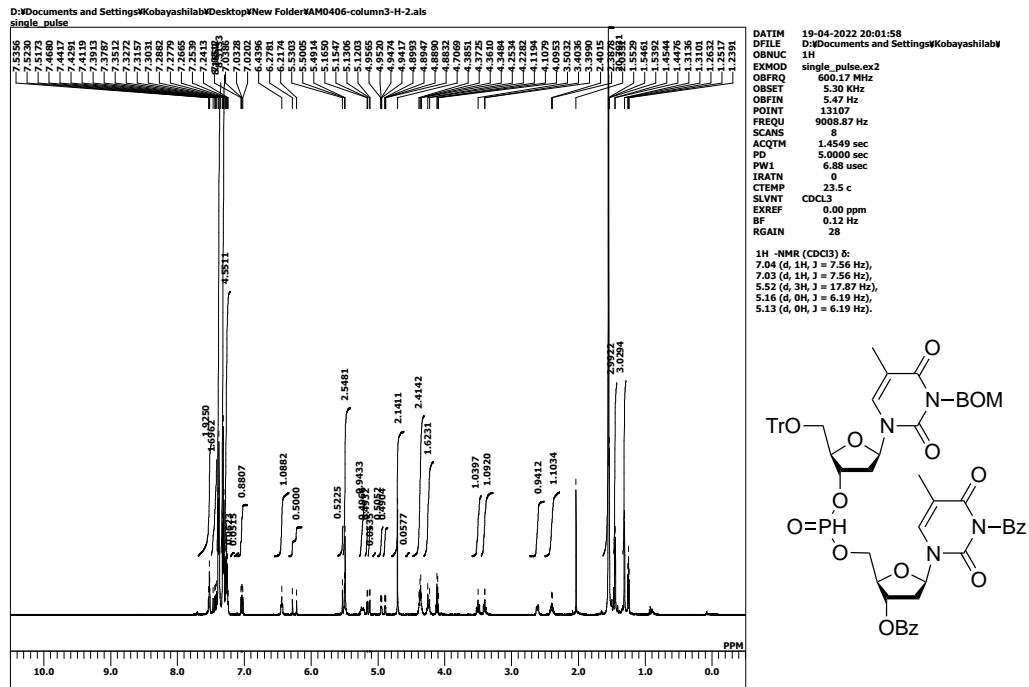

<sup>13</sup>C NMR (126 MHz, CDCl<sub>3</sub>) of **6b**

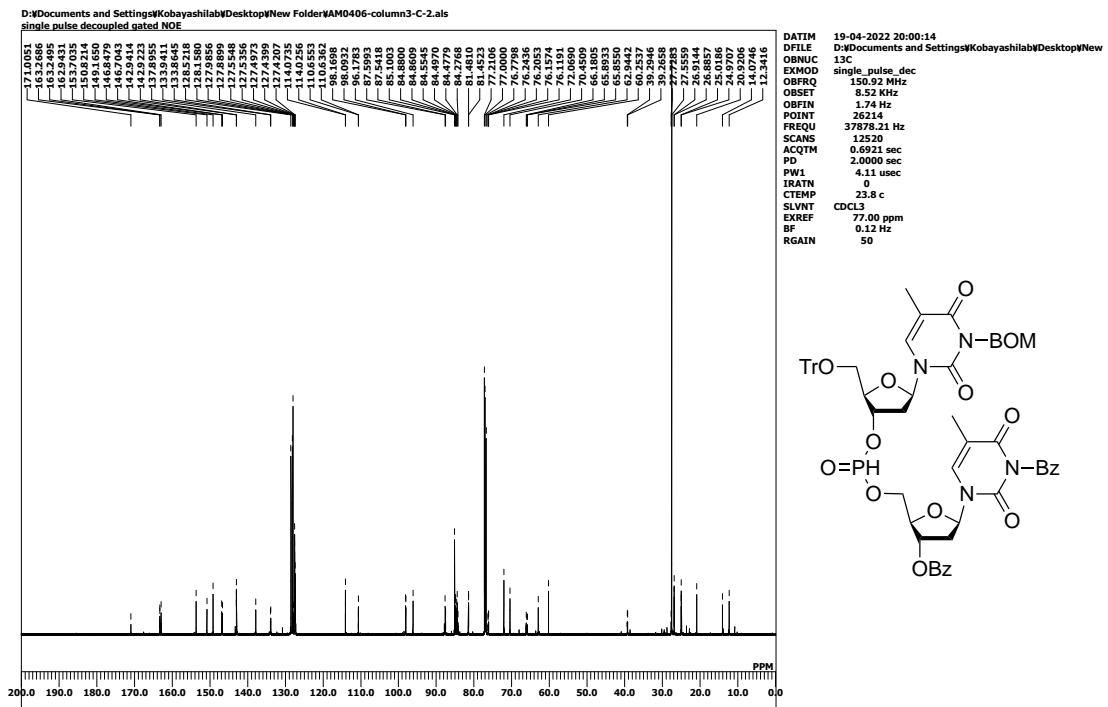

$^{31}\text{P}$  NMR (202 MHz,  $\text{CDCl}_3$ ) of **6b**

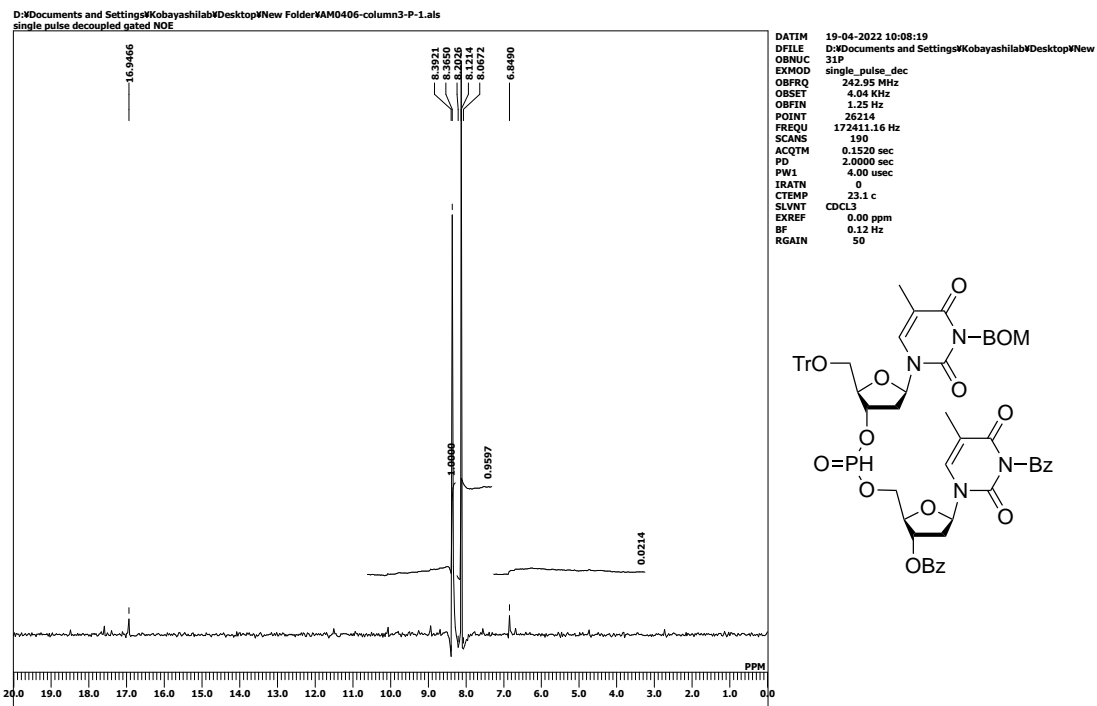



<sup>31</sup>P NMR (202 MHz, CDCl<sub>3</sub>) of **7a**

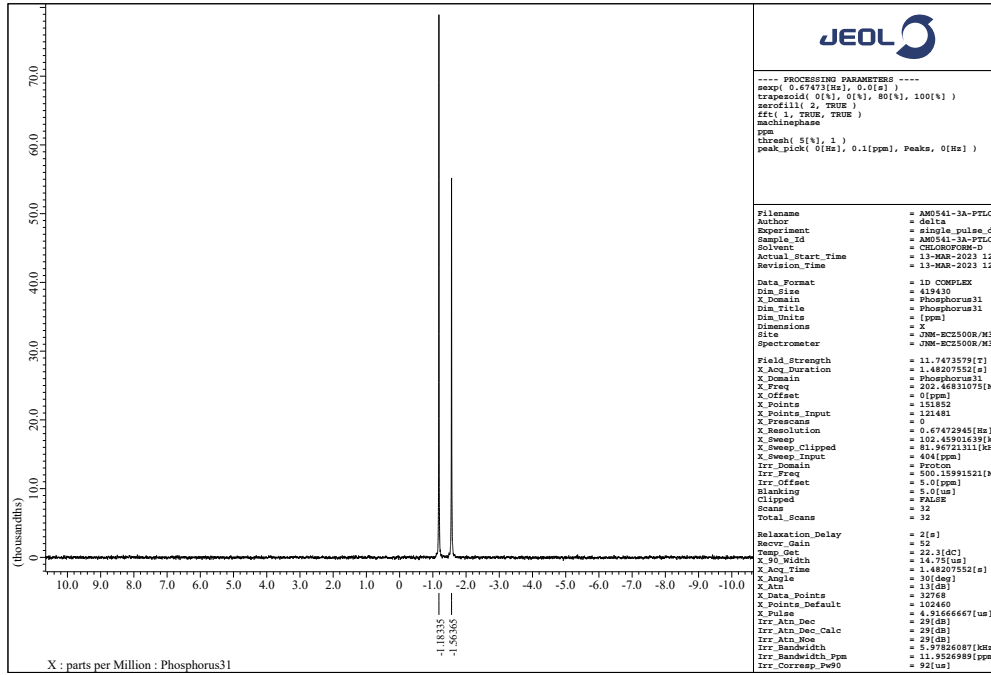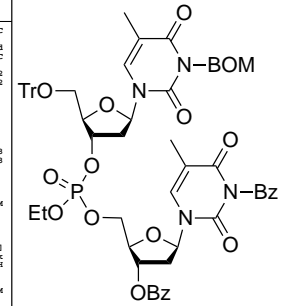



<sup>1</sup>H NMR (500 MHz, CDCl<sub>3</sub>) of **7b**

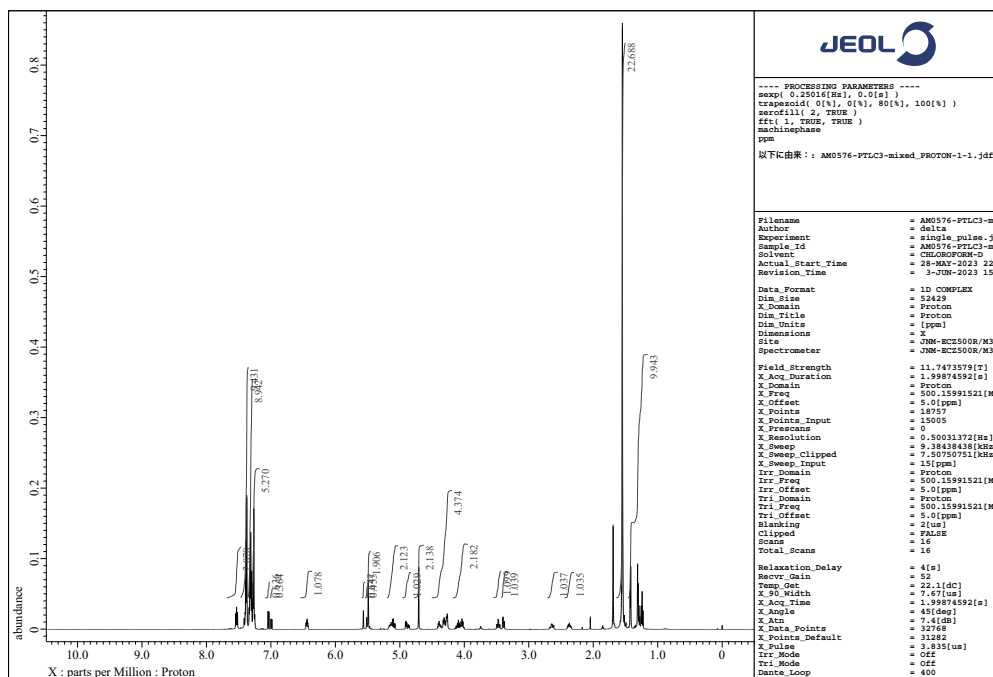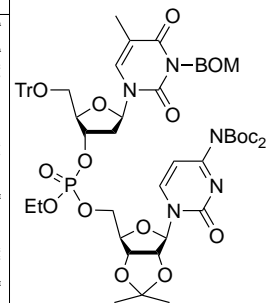

<sup>13</sup>C NMR (126 MHz, CDCl<sub>3</sub>) of **7b**

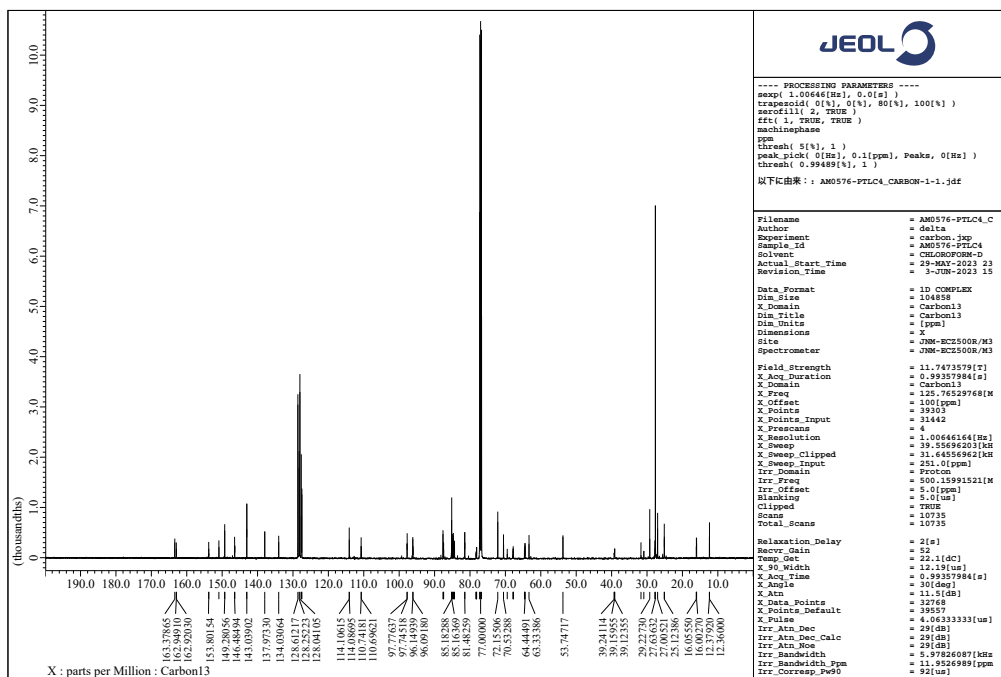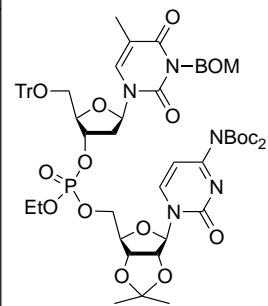

<sup>31</sup>P NMR (202 MHz, CDCl<sub>3</sub>) of **7b**

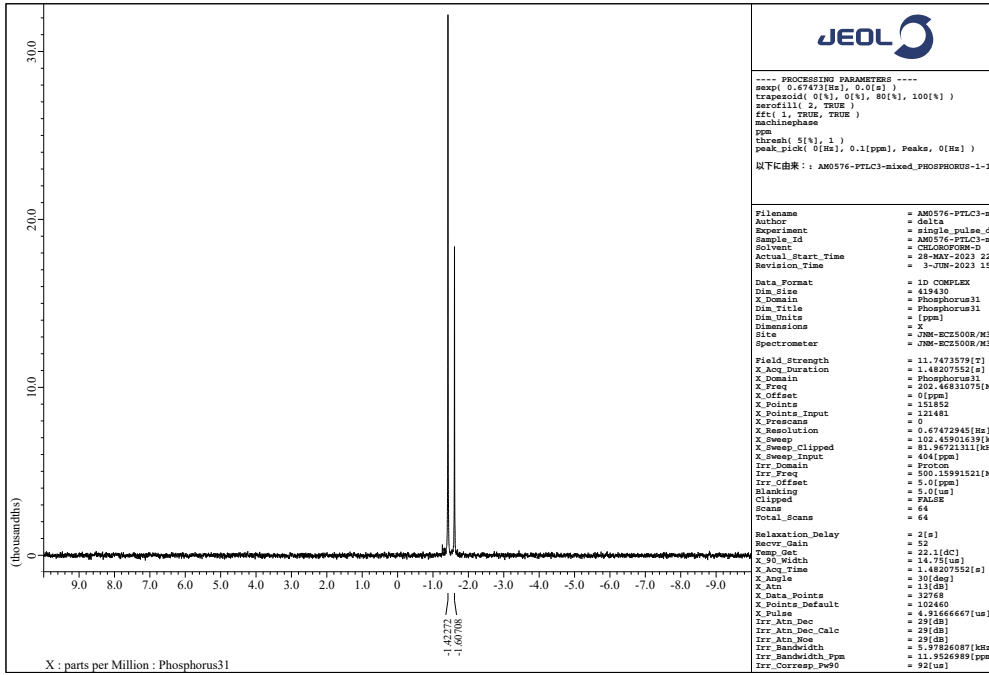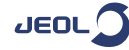

```

---- PROCESSING PARAMETERS ----
aopd( 0.67473[Hz], 0.0[us] )
trapezoid( 0[%), 0[%), 80[%), 100[%)
seofill( 2, TRUE )
fft( 2, TRUE, TRUE )
machstepsize
ppm
(thresh( 5[%), 1 )
peak_pos( [Hz], 0.1[ppm], Peaks, 0[Hz] )
以下に由来 : AM0576-PTLC3-mixed_PHOSPHORUS-1-1.
    
```

```

Filename           = AM0576-PTLC3-m
Author             = delta
Experiment         = single_pulse_d
Sample_Id         = AM0576-PTLC3-m
Solvent           = CDCl3OCDCl3-0
Actual_Start_Time = 28-MAY-2023 22
Revision_Time     = 3-JUN-2023 15

Data Format        = 1D COMPLEX
Dir_Size         = 419430
X_Domain         = Phosphorus31
Dir_Title        = Phosphorus31
Dir_Units        = [ppm]
Dimensions       = 2
Site             = JNM-ECZ500R/M3
Spectrometer     = JNM-ECZ500R/M3

Field_Strength   = 11.7473579[T]
X_Acq_Duration   = 1.48207552[s]
X_Domain         = Phosphorus31
X_Freq           = 202.46831075[M]
X_Offset         = 0[ppm]
X_Points         = 15852
X_Points_Input   = 121481
X_Frescans       = 0
X_Resolution     = 0.67472945[Hz]
X_Sweep          = 104.48204161[Hz]
X_Sweep_Clipped = 81.96721311[MHz]
X_Sweep_Input    = 404[ppm]
Irr_Domain       = Proton
Irr_Freq        = 500.1359915221[M]
Irr_Offset       = 5.0[ppm]
Blanking        = 3.0[us]
Clipped         = FALSE
#Scans          = 64
Total_Scans     = 64

Relaxation_Delay = 2[s]
Recvr_Gain       = 52
Temp_Get        = 22.1[dc]
X_90_Width     = 14.75[us]
X_Acq_Time     = 1.48207552[s]
X_Angle        = 30[deg]
X_Alt          = 13[db]
X_Data_Points  = 32768
X_Points_Default = 102460
X_Pulse        = 4.81666667[us]
Irr_Atn_Dec    = 29[db]
Irr_Atn_Dec_Calc = 29[db]
Irr_Atn_Noise = 29[db]
Irr_Bandwidth  = 5.37826087[MHz]
Irr_Bandwidth_Ppm = 11.9526989[ppm]
Irr_Corresp_Pw90 = 92[us]
    
```

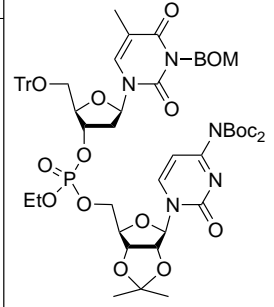

## 7. References

- [1] Li, J.; Tan, E.; Keller, N.; Chen, Y.-H.; Zehetmaier, P. M.; Jakowetz, A. C.; Bein, T.; Knochel, P. *J. Am. Chem. Soc.* **2019**, *141*, 98.
- [2] Li, X.-G.; Helariutta, K.; Roivainen, A.; Jalkanen, S.; Knuuti, J.; Airaksinen, A. J. *Nat. Protoc.* **2014**, *9*, 138.
- [3] Zammit, S. C.; Ferro, V.; Hammond, E.; Rizzacasa, M. A. *Org. Biomol. Chem.* **2007**, *5*, 2826.
- [4] Aleem, A. A. H. A.; Larsen, E.; Pedersen, E. B.; Nielsen, C.; Thomassen, T.; Mo, F.; Bartfai, T.; Langel, Ü. *Acta Chem. Scand.* **1995**, *49*, 609.
- [5] Giuliano, R. M.; Villani, F. J. *J. Org. Chem.*, **1995**, *60*, 202.
- [6] Wang, L.; Liang, T.; Fang, Z. *J. Carbohydr. Chem.* **2020**, *39*, 36.
- [7] Kang, M.; Park, J.; Konradi, A. W.; Pedersen, S. F. *J. Org. Chem.*, **1996**, *61*, 5528
- [8] Smit, C.; Bluemer, J.; Eerland, M. F.; Albers, M. F.; Mueller, M. P.; Goody, R. S.; Itzen, A.; Hedberg, C. *Angew. Chem. Int. Ed.*, **2011**, *50*, 9200.
- [9] Hospital, A.; Meurillon, M.; Peyrottes, S.; Perigaud, C. *Org. Lett.* **2013**, *15*, 4778.
- [10] Debarge, S.; Balzarini, J.; Maguire, A. R. *J. Org. Chem.* **2011**, *76*, 105.
- [11] Timperley, C. M.; Arbon, R. E.; Saunders, S. A.; Waters, M. J. *J. Fluor. Chem.* **2002**, *113*, 65.
- [12] Eger, K.; Klünder, E.; Beck, R. A.; Schloz, U. *Pharm. Res.* **1993**, *10*, 771.
- [13] He, S.; Zhao, H.; Guo, X.; Xin, G.; Huang, B.; Ma, L.; Zhou, X.; Zhang, R.; Du, D.; Wu, X.; Xing, Z.; Huang, W.; Chen, Q.; He, Y. *Tetrahedron* **2013**, *69*, 9245.
